# Supplementary material for: Magnesium Nutrient Application Induces Metabolomics and Physiological Responses in Mulberry (Morus alba) Plants
Source: Int J Mol Sci. 2023 Jun 2;24(11):9650. doi: 10.3390/ijms24119650 (PMC10253527; doi:10.3390/ijms24119650)
Supplement: Supplementary file 1 [file ijms-24-09650-s001.zip › Supplementary Table S1.xlsx]

## Sheet: all.exp.POS
Table S1: Metabolites profile at the positive (POS) ion mode in mulberry plants under deficiency, low and high magnesium (Mg) supply
index	MS2_name	MS1_name	formula	rtmin	mz	CK-1	CK-2	T1-1	T1-2	T2-1	T2-2	T3-1	T3-2	T4-1	T4-2	T5-1	T5-2	QC1	QC2	QC3	Class	CAS	HMDB	C_ID	Pathway	KEGG_B_class	KEGG_A_class
Com_5421_pos	Muramic acid	--	C9 H17 N O7	1.335	252.107	5.83856e+06	7.43167e+06	7.2936e+06	6.43664e+06	9.8318e+06	9.57602e+06	9.48517e+06	1.34465e+07	1.03713e+07	8.7452e+06	8.16348e+06	8.74377e+06	9.11161e+06	8.03193e+06	9.77056e+06	Organooxygen compounds	1114-41-6	HMDB0003254	-	-	-	-
Com_321_pos	Kaempferol	--	C15 H10 O6	5.506	287.055	4.00644e+07	4.13825e+07	6.00151e+07	6.00922e+07	1.60889e+08	1.4242e+08	1.18437e+08	9.90505e+07	7.27078e+07	6.75529e+07	3.815e+08	4.10729e+08	1.55415e+08	1.472e+08	1.51706e+08	Flavonoids	520-18-3	HMDB0005801	C05903	ko01100//Metabolic pathways;ko01110//Biosynthesis of secondary metabolites;ko00941//Flavonoid biosynthesis;ko00944//Flavone and flavonol biosynthesis	Biosynthesis of other secondary metabolites;Global and overview maps	Metabolism
Com_713_pos	Ecdysterone	--	C27 H44 O7	7.804	481.315	1.40698e+08	1.25064e+08	1.45603e+08	1.16751e+08	1.04045e+08	1.02442e+08	9.99843e+07	9.275e+07	1.4162e+08	1.35501e+08	1.07043e+08	9.12059e+07	1.15658e+08	9.88554e+07	1.14156e+08	Steroids and steroid derivatives	5289-74-7	HMDB0030180	-	-	-	-
Com_2291_pos	L-Threonine	--	C4 H9 N O3	1.307	120.065	2.42576e+07	2.20958e+07	2.44983e+07	2.43227e+07	4.02713e+07	4.16539e+07	1.95185e+07	2.38965e+07	3.95565e+07	3.71263e+07	2.78016e+07	2.05557e+07	2.0283e+07	2.30045e+07	3.38214e+07	Carboxylic acids and derivatives	72-19-5	HMDB0000167	C00188	ko01100//Metabolic pathways;ko01110//Biosynthesis of secondary metabolites;ko01120//Microbial metabolism in diverse environments;ko01130//Biosynthesis of antibiotics;ko01230//Biosynthesis of amino acids;ko02010//ABC transporters;ko00970//Aminoacyl-tRNA biosynthesis;ko00260//Glycine, serine and threonine metabolism;ko00860//Porphyrin and chlorophyll metabolism;ko00261//Monobactam biosynthesis;ko00…	Amino acid metabolism;Biosynthesis of other secondary metabolites;Global and overview maps;Membrane transport;Metabolism of cofactors and vitamins;Translation	Environmental Information Processing;Genetic Information Processing;Metabolism
Com_7702_pos	L-Lysine	--	C6 H14 N2 O2	1.147	147.113	7.05199e+06	5.6454e+06	5.51338e+06	5.72634e+06	3.13849e+06	3.70035e+06	5.15994e+06	4.79063e+06	6.35479e+06	6.00155e+06	5.01196e+06	4.76494e+06	4.9306e+06	5.07075e+06	4.99065e+06	Carboxylic acids and derivatives	-	HMDB0062809	C00047	ko01100//Metabolic pathways;ko01110//Biosynthesis of secondary metabolites;ko01120//Microbial metabolism in diverse environments;ko01130//Biosynthesis of antibiotics;ko01230//Biosynthesis of amino acids;ko02010//ABC transporters;ko01210//2-Oxocarboxylic acid metabolism;ko00970//Aminoacyl-tRNA biosynthesis;ko00960//Tropane, piperidine and pyridine alkaloid biosynthesis;ko00300//Lysine biosynthesis…	Amino acid metabolism;Biosynthesis of other secondary metabolites;Global and overview maps;Membrane transport;Metabolism of cofactors and vitamins;Translation	Environmental Information Processing;Genetic Information Processing;Metabolism
Com_706_pos	Uracil	--	C4 H4 N2 O2	2.208	113.034	1.67992e+08	1.48238e+08	1.09915e+08	1.00551e+08	1.25192e+08	1.22266e+08	1.45664e+08	1.36592e+08	1.06226e+08	1.31198e+08	1.63673e+08	1.42361e+08	1.38351e+08	1.39629e+08	1.3838e+08	Diazines	66-22-8	HMDB0000300	C00106	ko01100//Metabolic pathways;ko00410//beta-Alanine metabolism;ko00240//Pyrimidine metabolism;ko00770//Pantothenate and CoA biosynthesis	Global and overview maps;Metabolism of cofactors and vitamins;Metabolism of other amino acids;Nucleotide metabolism	Metabolism
Com_12884_pos	(1E,4Z,6E)-5-hydroxy-1,7-bis(4-hydroxyphenyl)hepta-1,4,6-trien-3-one	--	C19 H16 O4	4.919	309.111	2.26532e+06	1.9467e+06	837967	542271	1.70338e+06	1.49595e+06	1.16977e+06	975604	2.4304e+06	2.43187e+06	763445	789918	1.20988e+06	1.31458e+06	1.58436e+06	--	--	--	-	-	-	-
Com_5905_pos	Spermine	--	C10 H26 N4	1.184	203.223	7.97627e+06	6.8919e+06	3.76447e+06	3.33558e+06	1.51434e+06	1.54313e+06	3.71832e+06	3.58857e+06	1.20155e+07	1.20689e+07	2.2699e+06	2.37073e+06	4.54331e+06	4.99747e+06	4.3633e+06	Organonitrogen compounds	71-44-3	HMDB0001256	C00750	ko01100//Metabolic pathways;ko00330//Arginine and proline metabolism;ko00480//Glutathione metabolism;ko00410//beta-Alanine metabolism	Amino acid metabolism;Global and overview maps;Metabolism of other amino acids	Metabolism
Com_11054_pos	Kuromanin	--	C21 H20 O11	4.933	449.107	195781	179383	165074	152234	543246	279215	204083	215359	201159	205553	3.85752e+06	2.88356e+06	447148	485255	384063	--	--	--	-	-	-	-
Com_41_pos	Proline	--	C5 H9 N O2	1.367	116.07	3.3568e+09	3.15811e+09	2.36687e+09	2.239e+09	1.91101e+09	1.90332e+09	2.72494e+09	2.48178e+09	3.84087e+09	3.96491e+09	8.04076e+08	8.3292e+08	2.35496e+09	2.54792e+09	2.6462e+09	Carboxylic acids and derivatives	344-25-2	HMDB0003411	-	-	-	-
Com_586_pos	Coumarin	--	C9 H6 O2	5.324	147.044	9.64717e+07	8.20359e+07	1.51697e+08	1.44614e+08	5.21456e+07	8.20948e+07	2.17798e+08	1.95615e+08	1.4589e+08	1.53284e+08	1.72452e+08	1.89053e+08	1.25296e+08	1.4577e+08	1.22475e+08	Coumarins and derivatives	91-64-5	HMDB0001218	C05851	ko01110//Biosynthesis of secondary metabolites;ko00940//Phenylpropanoid biosynthesis	Biosynthesis of other secondary metabolites;Global and overview maps	Metabolism
Com_2872_pos	5,7-dihydroxy-3-(4-methoxyphenyl)-4H-chromen-4-one	--	C16 H12 O5	6.543	285.075	1.64346e+06	2.19426e+06	1.23473e+06	1.18552e+06	3.00948e+07	3.05714e+07	1.52436e+07	1.37913e+07	887645	1.4722e+06	1.51085e+07	1.46171e+07	1.0424e+07	9.18064e+06	9.10855e+06	--	--	--	-	-	-	-
Com_35_pos	Choline	--	C5 H13 N O	1.29	104.107	3.72842e+09	3.61818e+09	3.53675e+09	3.29039e+09	3.703e+09	3.63794e+09	4.75229e+09	4.6148e+09	4.13196e+09	4.13716e+09	4.60119e+09	4.47806e+09	3.73711e+09	4.08128e+09	3.34805e+09	Organonitrogen compounds	62-49-7	HMDB0000097	C00114	ko01100//Metabolic pathways;ko02010//ABC transporters;ko00260//Glycine, serine and threonine metabolism;ko00564//Glycerophospholipid metabolism	Amino acid metabolism;Global and overview maps;Lipid metabolism;Membrane transport	Environmental Information Processing;Metabolism
Com_65_pos	Pipecolic acid	--	C6 H11 N O2	1.762	130.086	2.19348e+08	1.83784e+08	1.4391e+08	1.2452e+08	2.26939e+09	2.28863e+09	9.90953e+08	9.51974e+08	2.21103e+08	2.01094e+08	5.28582e+08	4.97412e+08	6.75888e+08	7.90009e+08	7.5973e+08	Carboxylic acids and derivatives	3105-95-1	HMDB0000716	C00408	ko01100//Metabolic pathways;ko01110//Biosynthesis of secondary metabolites;ko00960//Tropane, piperidine and pyridine alkaloid biosynthesis;ko00310//Lysine degradation	Amino acid metabolism;Biosynthesis of other secondary metabolites;Global and overview maps	Metabolism
Com_3979_pos	Glycyl-L-leucine	--	C8 H16 N2 O3	5.027	189.123	2.01254e+07	1.63407e+07	1.67341e+07	1.5453e+07	7.99647e+06	7.39508e+06	1.31372e+07	1.16174e+07	9.34325e+06	1.03372e+07	1.09609e+07	9.38133e+06	1.21178e+07	1.31416e+07	1.35087e+07	Carboxylic acids and derivatives	-	HMDB0028929	-	-	-	-
Com_2462_pos	Isoeugenyl acetate	--	C12 H14 O3	5.227	207.101	1.78042e+07	1.98386e+07	1.95639e+07	1.85348e+07	2.8023e+07	2.21938e+07	2.29568e+07	2.14741e+07	2.19958e+07	2.20278e+07	4.34827e+07	3.66926e+07	2.57295e+07	2.3065e+07	2.48574e+07	Benzene and substituted derivatives	5912-87-8	HMDB0034135	-	-	-	-
Com_4850_pos	7汐-Hydroxytestosterone	--	C19 H28 O3	9.567	305.21	9.04217e+06	1.00429e+07	9.64715e+06	1.25544e+07	7.10023e+06	8.51145e+06	9.97538e+06	6.11027e+06	1.13996e+07	1.17052e+07	1.17108e+07	9.31446e+06	7.61795e+06	1.24775e+07	1.5138e+07	--	--	--	-	-	-	-
Com_1594_pos	8-Hydroxyquinoline	--	C9 H7 N O	5.477	146.06	7.54626e+06	7.94868e+06	4.99342e+06	4.97385e+06	6.54169e+07	5.70682e+07	2.24519e+07	2.11992e+07	6.97686e+06	7.07646e+06	6.35506e+06	5.57749e+06	2.03665e+07	1.92917e+07	1.8545e+07	--	--	--	-	-	-	-
Com_7190_pos	Kaempferol-3-O-汕-glucopyranosyl-7-O-汐-rhamnopyranoside	--	C27 H30 O15	5.201	595.165	565479	703340	236139	273367	6.47135e+06	7.78986e+06	3.39563e+06	2.16492e+06	266356	256099	3.02285e+06	3.28652e+06	2.26643e+06	2.23427e+06	2.13301e+06	--	--	--	-	-	-	-
Com_10637_pos	L-Kynurenine	--	C10 H12 N2 O3	4.689	209.092	3.70908e+06	2.85118e+06	1.59123e+06	1.81623e+06	2.69796e+06	2.24522e+06	2.30284e+06	2.09771e+06	1.70818e+06	1.80498e+06	2.22019e+06	2.31489e+06	2.13148e+06	2.34286e+06	2.18071e+06	Organooxygen compounds	2922-83-0	HMDB0000684	C00328	ko01100//Metabolic pathways;ko00380//Tryptophan metabolism	Amino acid metabolism;Global and overview maps	Metabolism
Com_1117_pos	2-Methoxybenzaldehyde	--	C8 H8 O2	5.381	137.06	5.43732e+07	5.10096e+07	6.06784e+07	8.62243e+07	6.21947e+07	5.94271e+07	9.12593e+07	7.65912e+07	5.3638e+07	4.80177e+07	6.8338e+07	5.54865e+07	8.08054e+07	4.6845e+07	6.4506e+07	Benzene and substituted derivatives	135-02-4	HMDB0033766	-	-	-	-
Com_5175_pos	Epinephrine	--	C9 H13 N O3	4.964	184.097	1.07267e+07	9.01603e+06	9.64148e+06	9.10253e+06	1.35831e+07	1.33501e+07	1.45928e+07	1.44638e+07	1.24754e+07	1.17984e+07	1.02579e+07	1.30465e+07	1.22763e+07	1.20241e+07	1.18535e+07	Phenols	114-07-8	HMDB0014344	C00788	ko01100//Metabolic pathways;ko00350//Tyrosine metabolism	Amino acid metabolism;Global and overview maps	Metabolism
Com_1163_pos	(3汕,5缶,9缶)-3,6,19-Trihydroxyurs-12-en-28-oic acid	--	C30 H48 O5	7.523	489.356	6.03244e+07	5.93259e+07	8.66007e+07	7.99246e+07	3.4365e+07	3.27079e+07	6.50125e+07	5.81076e+07	6.18201e+07	6.47083e+07	4.70136e+07	5.30438e+07	5.79173e+07	6.06716e+07	6.01989e+07	--	--	--	-	-	-	-
Com_2888_pos	Methyl cinnamate	--	C10 H10 O2	5.442	163.075	1.9674e+07	2.23068e+07	2.5745e+07	1.49852e+07	2.07296e+07	2.57998e+07	1.66868e+07	2.20771e+07	3.21862e+07	2.97498e+07	2.0958e+07	2.99382e+07	2.95763e+07	3.15246e+07	2.95126e+07	Cinnamic acids and derivatives	103-26-4	HMDB0033833	-	-	-	-
Com_1620_pos	Valylproline	--	C10 H18 N2 O3	4.736	215.139	6.45477e+07	6.06311e+07	5.31246e+07	4.88154e+07	3.92323e+07	4.12893e+07	4.17194e+07	3.96994e+07	4.2856e+07	4.33977e+07	4.17162e+07	3.97842e+07	4.66102e+07	4.7611e+07	4.78854e+07	Carboxylic acids and derivatives	-	HMDB0029135	-	-	-	-
Com_9133_pos	1-Methyladenosine	--	C11 H15 N5 O4	4.732	282.119	5.11424e+06	3.76789e+06	3.76573e+06	2.82779e+06	2.27547e+06	1.80435e+06	1.85762e+06	1.77184e+06	2.37884e+06	2.86251e+06	3.08395e+06	2.02005e+06	2.48939e+06	2.74169e+06	2.69612e+06	Purine nucleosides	15763-06-1	HMDB0003331	-	-	-	-
Com_4238_pos	Isohomovanillic acid	--	C9 H10 O4	5.01	183.065	5.06095e+06	4.59792e+06	1.17261e+07	1.5432e+07	8.07311e+06	7.27966e+06	1.11846e+07	6.86181e+06	1.18203e+07	7.31596e+06	1.0122e+07	1.03747e+07	9.06264e+06	7.38935e+06	9.79127e+06	Phenols	1131-94-8	HMDB0000333	-	-	-	-
Com_1876_pos	D-(+)-Proline	--	C5 H9 N O2	5.829	116.07	4.33613e+07	5.14821e+07	2.24668e+07	2.23042e+07	3.95901e+07	3.18572e+07	1.48712e+07	1.61845e+07	3.52491e+07	3.58258e+07	1.06422e+07	9.9227e+06	2.69764e+07	2.49585e+07	2.75561e+07	--	--	--	-	-	-	-
Com_2641_pos	2-Amino-1,3,4-octadecanetriol	--	C18 H39 N O3	6.222	318.299	2.56156e+07	1.22311e+07	2.09176e+07	1.95333e+07	2.18766e+07	3.41288e+07	3.40355e+07	3.19909e+07	3.01775e+07	3.16333e+07	3.40848e+07	3.40077e+07	2.59332e+07	2.81572e+07	2.87985e+07	--	--	--	-	-	-	-
Com_14175_pos	Biotin	--	C10 H16 N2 O3 S	5.285	245.095	537710	583616	871286	921951	1.16856e+06	1.61216e+06	890588	909017	931219	1.05878e+06	1.00959e+06	726701	905911	883886	947478	Biotin and derivatives	58-85-5	HMDB0000030	C00120	ko01100//Metabolic pathways;ko02010//ABC transporters;ko00780//Biotin metabolism	Global and overview maps;Membrane transport;Metabolism of cofactors and vitamins	Environmental Information Processing;Metabolism
Com_2372_pos	2-Hydroxyphenylalanine	--	C9 H11 N O3	1.899	182.081	3.22379e+07	3.04127e+07	3.13163e+07	3.35349e+07	2.37312e+07	2.13998e+07	2.33914e+07	2.18921e+07	3.05142e+07	3.11056e+07	3.43494e+07	2.93814e+07	2.5162e+07	2.6688e+07	2.87764e+07	Carboxylic acids and derivatives	2370-61-8	HMDB0006050	-	-	-	-
Com_548_pos	Testosterone	--	C19 H28 O2	7.252	289.216	1.63323e+08	1.57199e+08	1.7078e+08	1.73644e+08	7.49963e+07	7.74695e+07	9.65391e+07	1.01495e+08	1.75824e+08	2.00627e+08	1.20119e+08	1.23639e+08	1.38622e+08	1.42642e+08	1.31725e+08	Steroids and steroid derivatives	651-45-6	HMDB0002833	C00535	ko01100//Metabolic pathways;ko01120//Microbial metabolism in diverse environments	Global and overview maps	Metabolism
Com_2071_pos	Gentisic acid	--	C7 H6 O4	4.849	155.034	3.99051e+07	3.06301e+07	2.8734e+07	2.76339e+07	3.25717e+07	3.42454e+07	3.79194e+07	4.86986e+07	2.86654e+07	2.75454e+07	5.54455e+07	4.59352e+07	3.2757e+07	4.0539e+07	4.45807e+07	Benzene and substituted derivatives	490-79-9	HMDB0000152	C00628	ko01100//Metabolic pathways;ko01120//Microbial metabolism in diverse environments;ko00350//Tyrosine metabolism	Amino acid metabolism;Global and overview maps	Metabolism
Com_309_pos	Nicotinamide	--	C6 H6 N2 O	1.926	123.055	2.45999e+08	2.28919e+08	1.85227e+08	2.12057e+08	3.73062e+08	3.49294e+08	1.93223e+08	2.49896e+08	1.62083e+08	1.73231e+08	2.39269e+08	2.67904e+08	1.97638e+08	2.67432e+08	2.13696e+08	Pyridines and derivatives	98-92-0	HMDB0001406	C00153	ko01100//Metabolic pathways;ko00760//Nicotinate and nicotinamide metabolism	Global and overview maps;Metabolism of cofactors and vitamins	Metabolism
Com_4269_pos	11-汐-Hydroxy-17-methyltestosterone	--	C20 H30 O3	6.788	319.226	1.06459e+07	9.93911e+06	1.29156e+07	1.52985e+07	1.02261e+07	1.03464e+07	7.19238e+06	6.24591e+06	1.21996e+07	1.23573e+07	8.85358e+06	8.7239e+06	1.14288e+07	1.11477e+07	1.16364e+07	--	--	--	-	-	-	-
Com_913_pos	Phenmetrazine	--	C11 H15 N O	4.894	178.123	4.32047e+07	4.12351e+07	2.79029e+07	2.80579e+07	7.15168e+07	7.39146e+07	9.11005e+07	9.63286e+07	1.37091e+08	1.37617e+08	1.0857e+08	9.2612e+07	6.71216e+07	7.0874e+07	7.39953e+07	Oxazinanes	134-49-6	HMDB0014968	-	-	-	-
Com_1011_pos	3',4'-Dihydroxyphenylacetone	--	C9 H10 O3	5.612	167.07	9.1747e+06	9.16762e+06	7.57485e+06	8.42412e+06	4.16821e+07	4.04676e+07	2.35096e+07	1.71521e+07	8.46622e+06	8.51459e+06	1.27267e+08	1.2792e+08	5.37077e+07	3.98768e+07	3.80812e+07	--	--	--	-	-	-	-
Com_2540_pos	Apocynin	--	C9 H10 O3	5.177	167.07	2.79226e+07	3.01589e+07	2.32041e+07	2.52826e+07	3.62592e+07	1.34015e+07	2.7755e+07	2.53885e+07	3.13179e+07	3.15051e+07	2.8181e+07	2.84249e+07	3.02574e+07	2.81764e+07	3.16673e+07	--	--	--	-	-	-	-
Com_50_pos	Adenosine	--	C10 H13 N5 O4	2.807	268.103	2.98867e+09	2.45369e+09	2.25928e+09	2.22581e+09	1.67807e+09	1.66867e+09	3.20312e+09	2.92323e+09	2.24223e+09	2.64388e+09	2.06884e+09	1.82147e+09	2.16318e+09	2.50629e+09	2.29745e+09	Purine nucleosides	58-61-7	HMDB0000050	C00212	ko01100//Metabolic pathways;ko00230//Purine metabolism	Global and overview maps;Nucleotide metabolism	Metabolism
Com_10432_pos	Folinic acid	--	C20 H23 N7 O7	4.891	474.171	2.24048e+06	3.42244e+06	3.25639e+06	3.23918e+06	1.18512e+06	1.30695e+06	3.9771e+06	4.01158e+06	3.19608e+06	2.93114e+06	2.7859e+06	2.60344e+06	2.06521e+06	2.86697e+06	2.97609e+06	Pteridines and derivatives	-	HMDB0062757	C03479	ko01100//Metabolic pathways;ko00670//One carbon pool by folate	Global and overview maps;Metabolism of cofactors and vitamins	Metabolism
Com_2626_pos	Artemisinin	--	C15 H22 O5	5.601	283.153	2.84204e+07	2.88703e+07	2.78709e+07	2.42216e+07	2.42146e+07	2.67465e+07	3.52286e+07	3.0763e+07	3.86815e+07	2.41512e+07	3.43506e+07	3.74083e+07	2.92584e+07	3.08328e+07	3.26986e+07	--	--	--	-	-	-	-
Com_778_pos	1-(3,4-dimethoxyphenyl)ethan-1-one oxime	--	C10 H13 N O3	4.707	196.097	1.51948e+08	1.40259e+08	1.31449e+08	1.19462e+08	9.25686e+07	9.26366e+07	8.52481e+07	7.99548e+07	1.49514e+08	1.53651e+08	1.40313e+08	1.2914e+08	1.19446e+08	1.24845e+08	1.20775e+08	--	--	--	-	-	-	-
Com_693_pos	Tricin 5-O-汕-D-glucoside	--	C23 H24 O12	5.947	493.132	1.06585e+08	1.14836e+08	1.50157e+08	1.21097e+08	8.1156e+07	7.95397e+07	1.4668e+08	1.16442e+08	1.06848e+08	1.52927e+08	1.32595e+08	1.1892e+08	1.11848e+08	1.31365e+08	1.18727e+08	--	--	--	-	-	-	-
Com_702_pos	Ecgonine methyl ester	--	C10 H17 N O3	2.364	200.128	1.29572e+08	1.53089e+08	8.70038e+07	7.99134e+07	1.35587e+08	1.2751e+08	6.01242e+07	5.58724e+07	1.39192e+08	1.83608e+08	4.84222e+07	4.92973e+07	1.01467e+08	1.11904e+08	1.18453e+08	Carboxylic acids and derivatives	-	HMDB0062751	C12448	ko01100//Metabolic pathways;ko01110//Biosynthesis of secondary metabolites;ko00960//Tropane, piperidine and pyridine alkaloid biosynthesis	Biosynthesis of other secondary metabolites;Global and overview maps	Metabolism
Com_44_pos	L-Phenylalanine	--	C9 H11 N O2	4.829	166.086	1.92223e+09	1.77959e+09	1.74736e+09	1.63634e+09	3.54736e+09	3.53546e+09	1.67922e+09	1.63924e+09	2.47316e+09	2.44566e+09	1.79336e+09	1.77831e+09	2.1498e+09	2.20312e+09	2.24144e+09	Carboxylic acids and derivatives	63-91-2	HMDB0000159	C00079	ko01100//Metabolic pathways;ko01110//Biosynthesis of secondary metabolites;ko01130//Biosynthesis of antibiotics;ko01230//Biosynthesis of amino acids;ko02010//ABC transporters;ko00940//Phenylpropanoid biosynthesis;ko00360//Phenylalanine metabolism;ko01210//2-Oxocarboxylic acid metabolism;ko00970//Aminoacyl-tRNA biosynthesis;ko00960//Tropane, piperidine and pyridine alkaloid biosynthesis;ko00400//P…	Amino acid metabolism;Biosynthesis of other secondary metabolites;Global and overview maps;Membrane transport;Metabolism of other amino acids;Translation	Environmental Information Processing;Genetic Information Processing;Metabolism
Com_5418_pos	Paracetamol	--	C8 H9 N O2	1.375	152.07	6.26901e+06	6.29668e+06	4.52429e+06	4.78022e+06	1.25665e+07	1.25385e+07	8.21245e+06	7.25575e+06	9.18319e+06	6.58536e+06	1.30791e+07	8.56901e+06	6.85332e+06	8.26245e+06	8.09517e+06	Phenols	103-90-2	HMDB0001859	-	-	-	-
Com_375_pos	Acetophenone	--	C8 H8 O	2.457	121.065	9.17474e+07	8.782e+07	2.78796e+08	2.62317e+08	4.97018e+07	4.83611e+07	2.19677e+08	2.32031e+08	2.93346e+08	2.77456e+08	1.10973e+08	1.21583e+08	1.60863e+08	1.84774e+08	1.82156e+08	Organooxygen compounds	98-86-2	HMDB0033910	C07113	ko01120//Microbial metabolism in diverse environments;ko01220//Degradation of aromatic compounds	Global and overview maps	Metabolism
Com_3349_pos	Hesperetin	--	C16 H14 O6	5.446	303.086	2.17541e+07	2.14293e+07	2.21246e+07	2.06021e+07	2.04661e+07	2.08213e+07	2.48812e+07	2.00421e+07	2.46253e+07	2.21935e+07	2.78698e+07	2.7937e+07	2.49839e+07	2.27961e+07	2.30771e+07	Flavonoids	520-33-2	HMDB0005782	C01709	ko00941//Flavonoid biosynthesis	Biosynthesis of other secondary metabolites	Metabolism
Com_1634_pos	(+/-)5(6)-EET	--	C20 H32 O3	7.193	321.241	5.64239e+07	4.86008e+07	3.64471e+07	3.27034e+07	6.14786e+07	6.30663e+07	5.95528e+07	5.45677e+07	4.38709e+07	4.51168e+07	6.59608e+07	6.6641e+07	4.63957e+07	5.37312e+07	4.71267e+07	--	--	--	-	-	-	-
Com_4691_pos	Arecoline	--	C8 H13 N O2	5.132	156.102	1.3187e+07	1.32128e+07	9.91734e+06	9.70956e+06	1.29474e+07	1.41427e+07	1.1895e+07	1.35722e+07	1.74901e+07	1.65937e+07	1.10477e+07	1.16036e+07	1.2359e+07	1.39281e+07	1.20824e+07	-	63-75-2	HMDB0030353	-	-	-	-
Com_358_pos	L-Pyroglutamic acid	--	C5 H7 N O3	2.179	130.05	3.30215e+08	3.06804e+08	4.14288e+07	3.95236e+07	3.75392e+07	3.64902e+07	5.29605e+07	4.3816e+07	2.60724e+08	1.8858e+08	3.56089e+07	3.70375e+07	1.00419e+08	1.09302e+08	1.11563e+08	Carboxylic acids and derivatives	98-79-3	HMDB0000267	C01879	ko01100//Metabolic pathways;ko00480//Glutathione metabolism	Global and overview maps;Metabolism of other amino acids	Metabolism
Com_231_pos	Indole-3-lactic acid	--	C11 H11 N O3	5.474	206.081	7.71076e+07	7.69055e+07	3.51125e+07	3.23206e+07	5.38163e+08	5.58079e+08	2.06177e+08	2.13133e+08	6.3964e+07	6.35201e+07	4.23989e+07	5.13115e+07	1.93389e+08	1.71656e+08	1.87747e+08	Indoles and derivatives	1821-52-9	HMDB0000671	-	-	-	-
Com_10780_pos	5-Hydroxyindole-3-acetic acid	--	C10 H9 N O3	4.926	192.065	2.22167e+06	2.0717e+06	2.54101e+06	2.98953e+06	2.3906e+06	2.62433e+06	2.43861e+06	3.46886e+06	3.96985e+06	1.9345e+06	3.29396e+06	2.61035e+06	2.17793e+06	2.3399e+06	3.51042e+06	Indoles and derivatives	54-16-0	HMDB0000763	C05635	ko01100//Metabolic pathways;ko00380//Tryptophan metabolism	Amino acid metabolism;Global and overview maps	Metabolism
Com_2104_pos	Carvone	--	C10 H14 O	6.336	151.112	4.13996e+07	3.49745e+07	4.18238e+07	3.74249e+07	2.85676e+07	3.32648e+07	3.24451e+07	3.2738e+07	4.03406e+07	3.27953e+07	3.86304e+07	3.54021e+07	3.83025e+07	3.46556e+07	3.49618e+07	Prenol lipids	-	HMDB0061788	C11383	ko01110//Biosynthesis of secondary metabolites;ko00902//Monoterpenoid biosynthesis;ko00903//Limonene and pinene degradation	Global and overview maps;Metabolism of terpenoids and polyketides	Metabolism
Com_416_pos	Isorhapontigenin	--	C15 H14 O4	5.787	259.096	1.40382e+08	1.30153e+08	1.29223e+08	1.26533e+08	1.67349e+08	2.76265e+08	2.77902e+08	2.55111e+08	2.07555e+08	1.6681e+08	2.07945e+08	2.41172e+08	1.86988e+08	2.64821e+08	1.79757e+08	Stilbenes	-	HMDB0128522	-	-	-	-
Com_333_pos	Valine	--	C5 H11 N O2	1.784	118.086	1.76919e+08	2.09695e+08	1.86118e+08	1.82146e+08	3.4623e+08	3.38891e+08	1.27032e+08	1.21606e+08	2.13308e+08	1.88483e+08	1.72104e+08	1.51124e+08	2.07823e+08	1.99499e+08	1.97039e+08	Carboxylic acids and derivatives	72-18-4	HMDB0000883	-	-	-	-
Com_718_pos	Propionylcarnitine	--	C10 H19 N O4	2.305	218.138	8.50078e+07	8.20679e+07	9.64607e+07	1.37051e+08	7.73095e+07	9.20464e+07	9.39065e+07	8.3444e+07	1.15541e+08	1.31977e+08	1.07468e+08	1.00329e+08	1.07096e+08	1.1305e+08	1.19437e+08	Fatty Acyls	17298-37-2	HMDB0000824	-	-	-	-
Com_4890_pos	N6,N6,N6-Trimethyl-L-lysine	--	C9 H20 N2 O2	1.221	189.16	1.09473e+07	1.12124e+07	1.07221e+07	1.03732e+07	1.42944e+07	1.45848e+07	1.40299e+07	1.27036e+07	1.26822e+07	1.29236e+07	8.99004e+06	9.71853e+06	1.22121e+07	1.19482e+07	1.24527e+07	Carboxylic acids and derivatives	19253-88-4	HMDB0001325	C03793	ko00310//Lysine degradation	Amino acid metabolism	Metabolism
Com_6996_pos	Progesterone	--	C21 H30 O2	6.014	315.231	7.56608e+06	6.60113e+06	3.7913e+06	2.8479e+06	2.47345e+06	8.17577e+06	1.91703e+06	1.49995e+06	5.467e+06	4.875e+06	6.76839e+06	6.56634e+06	6.18132e+06	5.66657e+06	5.30438e+06	Steroids and steroid derivatives	57-83-0	HMDB0001830	C00410	ko01100//Metabolic pathways	Global and overview maps	Metabolism
Com_3761_pos	N-Acetylornithine	--	C7 H14 N2 O3	1.374	175.107	4.08657e+06	3.17824e+06	1.24855e+07	6.69038e+06	5.60039e+06	4.00795e+06	1.47359e+07	2.28116e+07	7.47972e+06	1.0388e+07	2.84799e+06	3.08921e+06	6.03229e+06	5.75296e+06	8.92959e+06	Carboxylic acids and derivatives	1572591	HMDB0003357	C00437	ko01100//Metabolic pathways;ko01110//Biosynthesis of secondary metabolites;ko01130//Biosynthesis of antibiotics;ko01230//Biosynthesis of amino acids;ko01210//2-Oxocarboxylic acid metabolism;ko00220//Arginine biosynthesis	Amino acid metabolism;Global and overview maps	Metabolism
Com_2034_pos	Dihydrokawain	--	C14 H16 O3	5.597	233.117	3.11194e+07	3.62164e+07	3.63848e+07	3.43184e+07	4.90618e+07	3.84134e+07	3.41132e+07	2.91514e+07	3.24581e+07	3.38314e+07	4.36096e+07	4.14989e+07	3.9099e+07	3.62837e+07	4.65776e+07	Kavalactones	587-63-3	HMDB0029504	-	-	-	-
Com_4717_pos	2-(2,4-dihydroxyphenyl)-3,5,7-trihydroxy-4H-chromen-4-one	--	C15 H10 O7	5.034	303.05	1.23085e+06	919892	796432	1.03086e+06	7.30033e+06	6.09423e+06	5.49891e+06	5.8574e+06	2.36402e+06	1.65053e+06	1.79787e+07	1.63742e+07	5.36487e+06	4.65285e+06	5.15764e+06	Flavonoids	480-16-0	HMDB0030796	-	-	-	-
Com_829_pos	Guanine	--	C5 H5 N5 O	3.184	152.057	1.31991e+08	1.31888e+08	1.09549e+08	1.03197e+08	6.76516e+07	6.8672e+07	1.09151e+08	1.09092e+08	9.45683e+07	1.305e+08	9.03173e+07	8.8627e+07	1.17038e+08	9.5933e+07	1.02135e+08	Imidazopyrimidines	73-40-5	HMDB0000132	C00242	ko01100//Metabolic pathways;ko00230//Purine metabolism	Global and overview maps;Nucleotide metabolism	Metabolism
Com_1231_pos	Citral	--	C10 H16 O	5.319	153.127	8.05358e+07	7.40279e+07	4.911e+07	4.65206e+07	8.27154e+07	8.4913e+07	1.00186e+08	8.38505e+07	5.21704e+07	6.06966e+07	9.40202e+07	9.20083e+07	6.63765e+07	7.00712e+07	8.50105e+07	--	--	--	-	-	-	-
Com_1131_pos	4-Hydroxybenzaldehyde	--	C7 H6 O2	4.75	123.044	3.16549e+07	2.93751e+07	6.87366e+07	6.61158e+07	4.40439e+07	4.64288e+07	9.53912e+07	9.6685e+07	7.64464e+07	9.29407e+07	1.04637e+08	1.12512e+08	6.8115e+07	7.34497e+07	7.80992e+07	Organooxygen compounds	123-08-0	HMDB0011718	C00633	ko01100//Metabolic pathways;ko01120//Microbial metabolism in diverse environments	Global and overview maps	Metabolism
Com_7087_pos	3-(1-benzylpiperidin-4-yl)-3H-[1,2,3]triazolo[4,5-b]pyridine	--	C17 H19 N5	5.104	294.17	5.44837e+06	4.11968e+06	7.15231e+06	5.22739e+06	2.18778e+06	5.5545e+06	5.68053e+06	4.02353e+06	3.38354e+06	3.07192e+06	4.93435e+06	4.4658e+06	3.44809e+06	4.01282e+06	3.06293e+06	--	--	--	-	-	-	-
Com_428_pos	Quercetin	--	C15 H10 O7	5.41	303.049	2.0915e+07	2.45584e+07	3.15854e+07	3.8036e+07	9.51917e+07	1.02914e+08	9.57172e+07	8.66239e+07	5.17295e+07	5.74592e+07	2.9782e+08	3.074e+08	1.15278e+08	1.06755e+08	1.17335e+08	Flavonoids	117-39-5	HMDB0005794	C00389	ko01100//Metabolic pathways;ko01110//Biosynthesis of secondary metabolites;ko00941//Flavonoid biosynthesis;ko00944//Flavone and flavonol biosynthesis	Biosynthesis of other secondary metabolites;Global and overview maps	Metabolism
Com_2048_pos	Eicosapentaenoic acid	--	C20 H30 O2	7.525	303.232	2.71898e+07	2.92201e+07	3.09132e+07	2.69358e+07	3.02395e+07	2.33042e+07	2.37323e+07	2.32388e+07	3.4332e+07	3.33047e+07	2.24793e+07	2.30128e+07	2.83931e+07	5.03256e+07	2.79074e+07	Fatty Acyls	10417-94-4	HMDB0001999	C06428	ko01040//Biosynthesis of unsaturated fatty acids	Lipid metabolism	Metabolism
Com_1567_pos	18-汕-Glycyrrhetinic acid	--	C30 H46 O4	7.523	471.346	4.06428e+07	4.04543e+07	5.94911e+07	5.5061e+07	2.44787e+07	2.40088e+07	4.48782e+07	4.02795e+07	4.23401e+07	4.55272e+07	3.26586e+07	3.89001e+07	3.91076e+07	4.22284e+07	4.31993e+07	--	--	--	-	-	-	-
Com_1185_pos	Cafestol	--	C20 H28 O3	6.66	317.21	8.17988e+07	7.37927e+07	7.49666e+07	6.90503e+07	8.10678e+07	7.92149e+07	7.35264e+07	7.76308e+07	8.09194e+07	1.03517e+08	7.14528e+07	6.96123e+07	8.65595e+07	8.13567e+07	8.49162e+07	Naphthofurans	469-83-0	HMDB0035710	-	-	-	-
Com_1853_pos	Phenylethanolamine	--	C8 H11 N O	5.376	138.091	4.76513e+07	4.56548e+07	4.53072e+07	4.68497e+07	5.14756e+07	5.13662e+07	3.56519e+07	3.40118e+07	4.67286e+07	4.60351e+07	4.71551e+07	4.55597e+07	4.35291e+07	4.43276e+07	4.82578e+07	Organonitrogen compounds	-	HMDB0062626	-	-	-	-
Com_2051_pos	11(Z),14(Z),17(Z)-Eicosatrienoic acid	--	C20 H34 O2	10.427	307.262	1.73456e+07	1.73739e+07	3.14793e+07	2.1739e+07	4.708e+07	4.83304e+07	2.28774e+07	2.26182e+07	1.54474e+07	1.45079e+07	1.17361e+07	1.23324e+07	2.4422e+07	2.28613e+07	2.7008e+07	--	--	--	-	-	-	-
Com_4095_pos	Riboflavin	--	C17 H20 N4 O6	5.253	377.145	1.23717e+07	1.30315e+07	1.35864e+07	1.60916e+07	1.27328e+07	1.14895e+07	1.19552e+07	1.10924e+07	8.69088e+06	1.05642e+07	1.3407e+07	1.21742e+07	1.06858e+07	1.23533e+07	8.94453e+06	Flavin nucleotides	146-17-8	HMDB0001520	C00255	ko01100//Metabolic pathways;ko01110//Biosynthesis of secondary metabolites;ko00740//Riboflavin metabolism	Global and overview maps;Metabolism of cofactors and vitamins	Metabolism
Com_11747_pos	Epitestosterone	--	C19 H28 O2	10.099	289.216	869642	797089	2.06537e+06	1.77305e+06	1.51655e+06	1.58854e+06	1.26158e+06	940728	920466	800858	746005	667316	2.26441e+06	1.92364e+06	3.01734e+06	Steroids and steroid derivatives	481-30-1	HMDB0000628	-	-	-	-
Com_1266_pos	Nootkatone	--	C15 H22 O	8.232	219.174	7.75871e+07	7.57254e+07	7.69647e+07	6.35824e+07	7.61491e+07	7.98271e+07	6.39879e+07	6.59087e+07	8.21856e+07	7.20631e+07	8.22727e+07	6.56764e+07	7.31044e+07	8.53022e+07	8.26224e+07	--	--	--	-	-	-	-
Com_810_pos	Monoolein	--	C21 H40 O4	9.981	357.299	1.40658e+08	1.27225e+08	1.14938e+08	1.21007e+08	4.01187e+07	3.76539e+07	1.34231e+08	1.40022e+08	1.52617e+08	1.50137e+08	1.55787e+08	1.48959e+08	1.17077e+08	1.18156e+08	1.2369e+08	Glycerolipids	-	HMDB0011567	-	-	-	-
Com_168_pos	L-Glutamic acid	--	C5 H9 N O4	1.31	148.06	3.89159e+08	4.46122e+08	2.86662e+08	4.07308e+08	7.90858e+08	8.13466e+08	3.79828e+08	5.95087e+08	8.08003e+08	8.19596e+08	7.66044e+08	4.48835e+08	5.07758e+08	6.15136e+08	6.42812e+08	Carboxylic acids and derivatives	-	HMDB0060475	C00025	ko01100//Metabolic pathways;ko01110//Biosynthesis of secondary metabolites;ko01120//Microbial metabolism in diverse environments;ko01130//Biosynthesis of antibiotics;ko01230//Biosynthesis of amino acids;ko02010//ABC transporters;ko01200//Carbon metabolism;ko01210//2-Oxocarboxylic acid metabolism;ko00250//Alanine, aspartate and glutamate metabolism;ko00970//Aminoacyl-tRNA biosynthesis;ko00220//Arg…	Amino acid metabolism;Biosynthesis of other secondary metabolites;Carbohydrate metabolism;Energy metabolism;Global and overview maps;Membrane transport;Metabolism of cofactors and vitamins;Metabolism of other amino acids;Translation	Environmental Information Processing;Genetic Information Processing;Metabolism
Com_545_pos	Pyridoxine	--	C8 H11 N O3	4.937	170.081	1.27133e+08	1.18771e+08	8.31939e+07	7.87214e+07	1.03268e+08	1.17265e+08	1.00059e+08	8.9106e+07	2.26266e+08	2.26185e+08	4.54155e+07	4.92739e+07	1.08108e+08	1.13378e+08	1.17944e+08	Pyridines and derivatives	65-23-6	HMDB0000239	C00314	ko01100//Metabolic pathways;ko01120//Microbial metabolism in diverse environments;ko00750//Vitamin B6 metabolism	Global and overview maps;Metabolism of cofactors and vitamins	Metabolism
Com_1080_pos	N-Acetyl-L-leucine	--	C8 H15 N O3	2.01	174.112	3.38428e+07	3.93818e+07	7.86436e+07	8.90725e+07	2.83407e+07	2.79646e+07	4.57638e+07	6.12818e+07	6.34471e+07	2.25464e+07	2.74533e+07	2.62512e+07	6.24589e+07	4.7818e+07	5.52535e+07	Carboxylic acids and derivatives	1188-21-2	HMDB0011756	-	-	-	-
Com_2921_pos	Glycerophospho-N-palmitoyl ethanolamine	--	C21 H44 N O7 P	9.355	454.292	1.04785e+07	9.27811e+06	7.25428e+06	6.34016e+06	1.77072e+07	1.60815e+07	3.36704e+07	3.14574e+07	8.00068e+06	7.00214e+06	1.09707e+07	1.11119e+07	1.09726e+07	1.42099e+07	1.29041e+07	--	--	--	-	-	-	-
Com_18_pos	汐-Eleostearic acid	--	C18 H30 O2	7.939	279.231	5.44946e+09	5.46362e+09	7.26861e+09	6.93353e+09	3.00425e+09	3.04979e+09	5.81505e+09	5.38117e+09	5.81807e+09	5.70503e+09	4.32428e+09	4.36695e+09	5.56748e+09	5.26569e+09	5.43354e+09	--	--	--	-	-	-	-
Com_23_pos	DL-Tryptophan	--	C11 H12 N2 O2	5.087	205.097	1.99566e+09	1.76032e+09	1.35965e+09	1.30148e+09	7.73526e+09	7.65934e+09	2.651e+09	2.62366e+09	2.74744e+09	2.92992e+09	1.54929e+09	1.59822e+09	2.98617e+09	2.96789e+09	3.19247e+09	Indoles and derivatives	54-12-6	HMDB0030396	-	-	-	-
Com_211_pos	Pantothenic acid	--	C9 H17 N O5	4.963	220.118	3.14927e+08	2.80612e+08	3.07025e+08	2.8256e+08	6.15092e+08	6.15103e+08	5.8688e+08	5.50967e+08	3.79757e+08	3.79582e+08	4.21262e+08	4.15812e+08	4.16483e+08	4.13282e+08	4.35649e+08	Alcohols and polyols	79-83-4	HMDB0000210	C00864	ko01100//Metabolic pathways;ko01110//Biosynthesis of secondary metabolites;ko00410//beta-Alanine metabolism;ko00770//Pantothenate and CoA biosynthesis	Global and overview maps;Metabolism of cofactors and vitamins;Metabolism of other amino acids	Metabolism
Com_3032_pos	Dehydrocholic acid	--	C24 H34 O5	7.088	403.247	2.24973e+07	2.22331e+07	2.55086e+07	2.34787e+07	9.94681e+06	1.92831e+07	2.82102e+07	2.54035e+07	1.16751e+07	2.22925e+07	2.3278e+07	2.61935e+07	2.33073e+07	2.3571e+07	2.23946e+07	--	--	--	-	-	-	-
Com_2529_pos	Sorbic acid	--	C6 H8 O2	5.288	113.06	2.38801e+07	2.51489e+07	1.73583e+07	2.6158e+07	3.02356e+07	2.62132e+07	3.02498e+07	2.97258e+07	3.83593e+07	3.2229e+07	2.87092e+07	3.20168e+07	3.49292e+07	2.60196e+07	3.80728e+07	--	--	--	-	-	-	-
Com_53_pos	汐-Linolenic acid	--	C18 H30 O2	9.588	279.231	1.80686e+09	1.85155e+09	2.32778e+09	1.93002e+09	2.74811e+09	2.90412e+09	1.52921e+09	1.55681e+09	1.46683e+09	1.41743e+09	1.75633e+09	1.28114e+09	1.75606e+09	2.12766e+09	1.92923e+09	--	--	--	-	-	-	-
Com_883_pos	Asparagine	--	C4 H8 N2 O3	1.308	133.061	1.04331e+08	9.4967e+07	3.61087e+07	3.47324e+07	1.20763e+08	7.14492e+07	7.15208e+07	1.33557e+08	1.01914e+08	1.0548e+08	6.23617e+07	5.36875e+07	6.45794e+07	1.31812e+08	1.35167e+08	Carboxylic acids and derivatives	70-47-3	HMDB0000168	-	-	-	-
Com_1531_pos	D-(-)-Quinic acid	--	C7 H12 O6	1.386	193.071	1.50626e+07	1.20876e+07	4.46088e+07	3.48736e+07	7.01199e+06	7.02813e+06	7.74922e+07	6.72842e+07	2.10198e+07	3.02978e+07	1.70309e+07	1.82083e+07	2.9005e+07	3.05027e+07	2.67705e+07	--	--	--	-	-	-	-
Com_1145_pos	N-Acetyl-DL-tryptophan	--	C13 H14 N2 O3	5.494	247.107	2.14833e+07	2.15225e+07	1.26056e+07	1.21418e+07	9.58975e+07	9.8231e+07	6.32437e+07	5.92597e+07	3.9523e+07	4.0027e+07	3.5469e+07	3.58265e+07	4.35332e+07	4.67366e+07	4.61036e+07	--	--	--	-	-	-	-
Com_1595_pos	L-Aspartic acid	--	C4 H7 N O4	1.311	134.045	4.23313e+07	3.7429e+07	3.10753e+07	3.39088e+07	3.40689e+07	3.27092e+07	3.98236e+07	3.95474e+07	4.08577e+07	4.31816e+07	5.4071e+07	5.00479e+07	6.39503e+07	4.01101e+07	6.83009e+07	Carboxylic acids and derivatives	56-84-8	HMDB0000191	C00049	ko01100//Metabolic pathways;ko01110//Biosynthesis of secondary metabolites;ko01120//Microbial metabolism in diverse environments;ko01130//Biosynthesis of antibiotics;ko01230//Biosynthesis of amino acids;ko02010//ABC transporters;ko01200//Carbon metabolism;ko01210//2-Oxocarboxylic acid metabolism;ko00250//Alanine, aspartate and glutamate metabolism;ko00970//Aminoacyl-tRNA biosynthesis;ko00220//Arg…	Amino acid metabolism;Biosynthesis of other secondary metabolites;Energy metabolism;Global and overview maps;Membrane transport;Metabolism of cofactors and vitamins;Metabolism of other amino acids;Translation	Environmental Information Processing;Genetic Information Processing;Metabolism
Com_303_pos	Trifolin	--	C21 H20 O11	5.497	449.107	1.24491e+07	1.24479e+07	1.44685e+07	1.24039e+07	9.18984e+07	9.46952e+07	5.4323e+07	4.53727e+07	2.47606e+07	2.88685e+07	4.20488e+08	4.30115e+08	1.16248e+08	1.20993e+08	1.17487e+08	Flavonoids	23627-87-4	HMDB0030864	C12626	ko00944//Flavone and flavonol biosynthesis	Biosynthesis of other secondary metabolites	Metabolism
Com_1431_pos	Scopoletin	--	C10 H8 O4	5.083	193.049	9.95071e+06	1.05358e+07	6.19732e+06	4.00267e+06	3.73004e+07	3.60189e+07	3.07451e+07	2.82039e+07	6.38228e+06	5.40272e+06	8.25043e+07	8.45453e+07	2.97287e+07	3.04015e+07	3.12983e+07	Coumarins and derivatives	92-61-5	HMDB0034344	C01752	ko01110//Biosynthesis of secondary metabolites;ko00940//Phenylpropanoid biosynthesis	Biosynthesis of other secondary metabolites;Global and overview maps	Metabolism
Com_46_pos	Trigonelline	--	C7 H7 N O2	1.346	138.055	1.33751e+09	2.55023e+09	1.55514e+09	8.09377e+08	1.17933e+09	1.2335e+09	1.34758e+09	2.56905e+09	2.36035e+09	2.85642e+09	2.17385e+09	3.63584e+09	2.36501e+09	2.35174e+09	2.41209e+09	-	535-83-1	HMDB0000875	C01004	ko00760//Nicotinate and nicotinamide metabolism	Metabolism of cofactors and vitamins	Metabolism
Com_3236_pos	(3汕,5缶,9缶)-3,23-Dihydroxy-1-oxoolean-12-en-28-oic acid	--	C30 H46 O5	7.503	487.341	1.36151e+07	1.83843e+07	2.32995e+07	2.12892e+07	8.28551e+06	4.32189e+06	1.06025e+07	1.06429e+07	1.16105e+07	1.35772e+07	9.61134e+06	1.06128e+07	1.69895e+07	1.25988e+07	1.11754e+07	--	--	--	-	-	-	-
Com_12639_pos	5-[4-(phenylsulfonyl)phenyl]-1H-pyrazole	--	C15 H12 N2 O2 S	4.016	307.047	1.23356e+06	1.10045e+06	919102	958295	1.99997e+06	2.22062e+06	1.02225e+06	1.10174e+06	882986	847979	2.7477e+06	2.33373e+06	1.21438e+06	1.37859e+06	1.31113e+06	--	--	--	-	-	-	-
Com_4083_pos	--	Oxyresveratrol	C14 H12 O4	5.89	245.08	1.64316e+07	1.36408e+07	1.63502e+07	1.61488e+07	1.28476e+07	1.0054e+07	1.31692e+07	1.1e+07	2.12679e+07	1.79493e+07	1.29518e+07	1.86314e+07	1.42397e+07	1.48433e+07	1.31445e+07	Stilbenes	-	HMDB0128505	-	-	-	-
Com_3666_pos	Ciprostene	--	C22 H36 O4	7.922	183.138	1.84008e+07	2.01867e+07	1.73002e+07	1.86768e+07	1.0327e+07	9.22807e+06	1.81494e+07	1.52739e+07	1.98699e+07	2.01481e+07	1.71936e+07	1.45658e+07	1.72049e+07	1.94489e+07	1.70953e+07	--	--	--	-	-	-	-
Com_10522_pos	SLK	--	C15 H30 N4 O5	4.017	174.118	3.80806e+06	3.21216e+06	2.24239e+06	2.27606e+06	1.18159e+06	1.11381e+06	1.58801e+06	2.17867e+06	1.16692e+06	1.21569e+06	1.46602e+06	1.39885e+06	1.73508e+06	1.92505e+06	2.07258e+06	--	--	--	-	-	-	-
Com_14353_pos	--	Arabidopyl shikimic acid	C16 H16 O9	4.977	353.086	923438	801985	714758	626549	1.17725e+06	1.14743e+06	1.37789e+06	1.6466e+06	1.20676e+06	1.07987e+06	1.42909e+06	1.30606e+06	1.03192e+06	1.28587e+06	1.18932e+06	--	--	--	-	-	-	-
Com_834_pos	(+/-)11(12)-DiHET	--	C20 H34 O4	7.49	321.242	1.11612e+08	9.98342e+07	1.23417e+08	1.06595e+08	6.97263e+07	6.54611e+07	7.14004e+07	6.88968e+07	1.12404e+08	1.30511e+08	8.70989e+07	8.15575e+07	9.60269e+07	1.20581e+08	1.03299e+08	--	--	--	-	-	-	-
Com_1458_pos	--	Pro-Leu	C11 H20 N2 O3	1.977	229.154	7.09829e+07	6.9543e+07	6.52819e+07	6.10824e+07	3.30089e+07	3.22764e+07	7.67747e+07	6.86784e+07	5.59614e+07	5.50915e+07	5.08807e+07	4.94636e+07	5.21255e+07	7.18161e+07	5.7166e+07	--	--	--	-	-	-	-
Com_3081_pos	--	Naringerin	C15 H12 O5	5.022	273.075	332324	329597	669357	463329	894820	742716	3.13876e+07	2.61658e+07	228663	294351	1.49658e+06	1.20745e+06	4.01309e+06	5.41145e+06	4.31854e+06	--	--	--	-	-	-	-
Com_3363_pos	Epinastine	--	C16 H15 N3	4.91	250.13	1.41384e+07	1.2244e+07	1.24129e+07	1.0093e+07	1.80599e+07	8.85057e+06	1.65673e+07	1.48861e+07	1.72293e+07	1.60269e+07	2.88259e+07	2.53033e+07	1.56625e+07	1.76698e+07	1.73167e+07	Benzazepines	80012-43-7	HMDB0014889	-	-	-	-
Com_3865_pos	Deltaline	--	C27 H41 N O8	5.815	508.29	7.46317e+06	8.10668e+06	4.39962e+06	4.09758e+06	2.05672e+07	1.85379e+07	3.33509e+06	2.0666e+06	5.84405e+06	3.62074e+06	2.32369e+06	2.5024e+06	7.04303e+06	4.83401e+06	7.49889e+06	--	--	--	-	-	-	-
Com_485_pos	5-(6-hydroxy-6-methyloctyl)-2,5-dihydrofuran-2-one	--	C13 H22 O3	5.597	209.153	1.12042e+08	1.24874e+08	1.47468e+08	1.53095e+08	2.17798e+08	2.29609e+08	1.77347e+08	1.56363e+08	1.90908e+08	1.95997e+08	2.548e+08	2.21121e+08	2.01966e+08	1.89369e+08	1.89634e+08	--	--	--	-	-	-	-
Com_2017_pos	TAG (15:0-16:1-16:2)	--	C50 H90 O6	10.868	809.65	202749	184285	4.4284e+07	9.52427e+06	435583	389840	572586	535939	278505	313217	265284	261997	459816	447653	462745	--	--	--	-	-	-	-
Com_4299_pos	2-(tert-butyl)-6,7-dimethoxy-4H-3,1-benzoxazin-4-one	--	C14 H17 N O4	5.111	264.123	1.36569e+07	1.24477e+07	5.52031e+06	5.61893e+06	1.04897e+07	1.10689e+07	1.63338e+07	1.55529e+07	2.00703e+07	1.88254e+07	1.58878e+07	1.40939e+07	1.26529e+07	1.2588e+07	1.34933e+07	--	--	--	-	-	-	-
Com_4329_pos	IMH	--	C17 H29 N5 O4 S	5.154	400.208	6.68919e+06	6.41032e+06	6.31692e+06	3.25943e+06	1.47592e+07	1.77108e+07	6.80942e+06	5.44085e+06	1.10654e+07	1.11106e+07	3.96122e+06	4.6734e+06	7.34457e+06	7.77315e+06	6.64496e+06	--	--	--	-	-	-	-
Com_7907_pos	--	p-Coumaric acid ethyl ester	C11 H12 O3	4.955	193.086	3.38113e+06	3.87864e+06	3.28159e+06	3.18986e+06	4.23405e+06	6.57917e+06	4.54431e+06	3.97382e+06	4.89827e+06	4.44849e+06	5.32437e+06	5.20212e+06	4.00415e+06	4.33342e+06	4.23383e+06	--	--	--	-	-	-	-
Com_10165_pos	--	Methionine sulfoxide	C5 H11 N O3 S	1.323	166.053	2.79869e+06	2.75652e+06	1.81228e+06	1.67126e+06	1.1757e+06	920995	1.50863e+06	1.3572e+06	3.92829e+06	4.48436e+06	2.01968e+06	997860	2.25929e+06	2.41732e+06	2.31767e+06	Carboxylic acids and derivatives	62697-73-8	HMDB0002005	-	-	-	-
Com_15054_pos	1-benzyl-3-butyl-4-hydroxy-6-phenylpyridin-2(1H)-one	--	C22 H23 N O2	9.075	356.157	355941	378336	371820	521238	728940	953989	1.37351e+06	943964	515485	583451	635801	778604	620126	682900	541087	--	--	--	-	-	-	-
Com_1946_pos	Ala-Ile	--	C9 H18 N2 O3	5.01	203.139	5.19985e+07	4.92331e+07	3.56665e+07	3.36819e+07	2.13237e+07	2.24147e+07	4.16763e+07	4.08456e+07	2.93225e+07	3.06835e+07	3.45644e+07	3.25062e+07	3.56315e+07	3.36274e+07	3.7128e+07	Carboxylic acids and derivatives	-	HMDB0028690	-	-	-	-
Com_8280_pos	5汐-Pregnan-3,20-dione	--	C21 H32 O2	11.003	317.245	1.47676e+06	1.50752e+06	3.93169e+06	3.67773e+06	2.9139e+06	2.79602e+06	4.61982e+06	4.02368e+06	2.23871e+06	1.77896e+06	1.72491e+06	1.85078e+06	6.0758e+06	4.91784e+06	5.60248e+06	--	--	--	-	-	-	-
Com_12582_pos	--	Phenylacetylglutamine	C13 H16 N2 O4	4.88	265.118	2.08096e+06	1.91535e+06	1.65683e+06	1.62829e+06	2.16094e+06	2.00708e+06	1.8142e+06	1.52115e+06	2.28787e+06	1.92435e+06	2.78973e+06	1.83006e+06	1.83148e+06	1.76294e+06	1.64346e+06	Carboxylic acids and derivatives	-	HMDB0062645	C04148	ko00360//Phenylalanine metabolism	Amino acid metabolism	Metabolism
Com_3408_pos	--	Anhydroicaritin	C21 H20 O6	5.387	369.132	3.50011e+06	3.44959e+06	1.80905e+07	4.37882e+06	9.69168e+06	8.80478e+06	7.2911e+06	5.79038e+06	7.633e+06	2.11723e+07	2.83673e+07	1.11116e+07	7.26317e+06	7.86581e+06	7.92158e+06	--	--	--	-	-	-	-
Com_3845_pos	--	N-Feruloylspermidine	C17 H27 N3 O3	7.106	322.212	1.6161e+06	9.79391e+06	1.84737e+07	2.28062e+06	1.90632e+06	1.23551e+06	1.28447e+06	1.81412e+06	3.77011e+06	2.98974e+06	1.05861e+07	2.14805e+06	2.59523e+06	1.55772e+06	2.84923e+06	--	--	--	-	-	-	-
Com_5371_pos	Oleoyl ethanolamide	--	C20 H39 N O2	9.834	326.305	1.25772e+07	1.2123e+07	5.96293e+06	5.80527e+06	9.60674e+06	9.25451e+06	3.12736e+06	3.09018e+06	3.48081e+06	3.29545e+06	4.8913e+06	4.81079e+06	6.8642e+06	7.10467e+06	6.49043e+06	--	--	--	-	-	-	-
Com_430_pos	Lofepramine	--	C26 H27 Cl N2 O	5.52	441.173	2.3613e+08	2.45449e+08	2.27791e+08	2.28887e+08	2.16807e+08	1.87542e+08	2.61322e+08	2.27715e+08	2.01954e+08	1.98273e+08	3.10797e+08	2.87125e+08	2.31512e+08	2.59488e+08	2.47185e+08	Benzazepines	50-49-7	HMDB0001848	-	-	-	-
Com_2436_pos	Nifekalant	--	C19 H27 N5 O5	5.396	406.208	6.83399e+06	5.23376e+06	1.06603e+07	2.90896e+07	2.3269e+07	2.11105e+07	1.16408e+07	2.63405e+07	5.15007e+06	4.05193e+07	2.03221e+07	2.08178e+07	3.81662e+07	3.65798e+07	3.84824e+07	--	--	--	-	-	-	-
Com_690_pos	NNK	--	C14 H26 N6 O6	5.892	357.19	1.43013e+08	1.60141e+08	1.3521e+08	9.69337e+07	1.31558e+08	1.24753e+08	1.20194e+08	9.93795e+07	1.17993e+08	1.14493e+08	1.17607e+08	1.21255e+08	1.01235e+08	7.32406e+07	1.37334e+08	Organooxygen compounds	64091-91-4	HMDB0011603	-	-	-	-
Com_12282_pos	ACar 10:1	--	C17 H32 N O4	5.416	314.231	1.80134e+06	1.31885e+06	1.98233e+06	1.40853e+06	2.18564e+06	2.01635e+06	2.22371e+06	1.86973e+06	1.6857e+06	1.99145e+06	1.82266e+06	1.96358e+06	2.58039e+06	1.67752e+06	2.04768e+06	--	--	--	-	-	-	-
Com_1581_pos	(9cis)-Retinal	--	C20 H28 O	5.884	285.221	6.6914e+07	6.25061e+07	1.63743e+07	1.4086e+07	3.06232e+07	2.98041e+07	2.54809e+07	1.88785e+07	1.02261e+07	2.04507e+07	4.6475e+07	5.69194e+07	3.45253e+07	3.8656e+07	3.71597e+07	--	--	--	-	-	-	-
Com_582_pos	L-Tyrosine	--	C9 H11 N O3	2.351	182.081	1.24807e+08	1.45538e+08	1.74074e+08	1.47293e+08	1.08248e+08	1.00967e+08	1.22864e+08	1.28291e+08	1.26315e+08	1.21061e+08	1.38232e+08	1.15998e+08	1.29768e+08	1.25524e+08	1.27001e+08	Carboxylic acids and derivatives	60-18-4	HMDB0000158	C00082	ko01100//Metabolic pathways;ko01110//Biosynthesis of secondary metabolites;ko01130//Biosynthesis of antibiotics;ko01230//Biosynthesis of amino acids;ko00940//Phenylpropanoid biosynthesis;ko00360//Phenylalanine metabolism;ko01210//2-Oxocarboxylic acid metabolism;ko00350//Tyrosine metabolism;ko00970//Aminoacyl-tRNA biosynthesis;ko00950//Isoquinoline alkaloid biosynthesis;ko00400//Phenylalanine, tyr…	Amino acid metabolism;Biosynthesis of other secondary metabolites;Global and overview maps;Metabolism of cofactors and vitamins;Metabolism of other amino acids;Translation	Genetic Information Processing;Metabolism
Com_1415_pos	Linalool	--	C10 H18 O	7.144	155.143	5.95784e+07	5.41187e+07	6.75523e+07	6.02638e+07	2.32866e+07	2.39397e+07	2.76182e+07	2.07794e+07	4.25355e+07	4.28744e+07	3.50638e+07	3.08326e+07	4.21346e+07	4.3803e+07	4.08206e+07	Prenol lipids	78-70-6	HMDB0036100	-	-	-	-
Com_10474_pos	pentane-1,2,3,4,5-pentol	--	C5 H12 O5	1.381	153.075	3.17171e+06	2.38313e+06	1.39184e+06	1.47211e+06	2.44055e+06	2.90312e+06	2.5973e+06	3.22031e+06	2.26362e+06	2.88056e+06	4.37922e+06	3.94736e+06	2.46302e+06	2.49134e+06	3.00842e+06	--	--	--	-	-	-	-
Com_9033_pos	Dehydroepiandrosterone (DHEA)	--	C19 H28 O2	9.691	271.205	4.26688e+06	4.39079e+06	4.37174e+06	3.48656e+06	3.69936e+06	3.97653e+06	4.0137e+06	3.21514e+06	4.82495e+06	5.02438e+06	5.07305e+06	4.60871e+06	4.65809e+06	5.35349e+06	4.23716e+06	--	--	--	-	-	-	-
Com_4045_pos	Sesamoside	--	C17 H24 O12	5.079	438.154	1.7198e+07	1.83629e+07	3.59357e+06	3.38308e+06	3.03069e+06	2.43306e+06	3.65365e+06	3.59832e+06	1.1492e+07	1.13482e+07	3.16442e+06	3.20548e+06	6.42184e+06	5.97094e+06	6.28721e+06	--	--	--	-	-	-	-
Com_11292_pos	Androstenedione	--	C19 H26 O2	9.162	287.198	2.60728e+06	2.91661e+06	1.94095e+06	2.67461e+06	3.10348e+06	2.767e+06	1.8282e+06	1.57307e+06	1.45925e+06	1.64501e+06	1.36121e+06	1.22387e+06	2.02803e+06	1.82024e+06	1.867e+06	Steroids and steroid derivatives	63-05-8	HMDB0000053	C00280	ko01100//Metabolic pathways;ko01120//Microbial metabolism in diverse environments	Global and overview maps	Metabolism
Com_3211_pos	Proline-hydroxyproline	--	C10 H16 N2 O4	4.959	229.118	2.68403e+07	2.42834e+07	2.24593e+07	1.98336e+07	1.25289e+07	1.26615e+07	2.08873e+07	1.80311e+07	1.32227e+07	1.33486e+07	1.63908e+07	1.46147e+07	1.74188e+07	1.84095e+07	1.75413e+07	Carboxylic acids and derivatives	18684-24-7	HMDB0006695	-	-	-	-
Com_3253_pos	ethyl 3-methyl-5-[(phenoxycarbonyl)amino]isothiazole-4-carboxylate	--	C14 H14 N2 O4 S	1.407	135.065	1.23577e+07	8.66715e+06	5.98535e+06	4.67996e+06	1.71651e+07	1.75912e+07	8.65172e+06	9.50731e+06	1.22352e+07	1.24722e+07	3.00561e+07	2.819e+07	1.0392e+07	1.04895e+07	1.25601e+07	--	--	--	-	-	-	-
Com_2686_pos	5-fluoro AB-PINACA N-(4-hydroxypentyl) metabolite	--	C18 H25 F N4 O3	5.942	387.18	2.46145e+07	2.57837e+07	2.13294e+07	2.38811e+07	2.59168e+07	2.33e+07	3.04395e+07	3.57306e+07	1.99429e+07	2.9019e+07	3.16136e+07	2.85933e+07	2.55329e+07	2.6393e+07	2.19856e+07	--	--	--	-	-	-	-
Com_8609_pos	Bufotalin	--	C26 H36 O6	5.344	445.265	5.73324e+06	5.36681e+06	2.91713e+06	2.6259e+06	2.45656e+06	1.73442e+06	4.27129e+06	3.0684e+06	2.69533e+06	2.84871e+06	3.54779e+06	3.87377e+06	4.82979e+06	3.54447e+06	2.97091e+06	--	--	--	-	-	-	-
Com_6605_pos	--	Xanthotoxol geranyl ether	C21 H22 O4	6.871	339.158	1.29152e+06	1.26653e+06	1.38393e+06	1.27986e+06	7.24263e+06	9.07314e+06	4.40074e+06	3.43165e+06	1.32435e+06	1.21186e+06	4.06024e+06	4.04184e+06	2.70069e+06	2.80357e+06	3.21037e+06	Coumarins and derivatives	7437-55-0	HMDB0039309	-	-	-	-
Com_15294_pos	--	Tussilagone	C23 H34 O5	5.855	391.247	999623	1.02563e+06	879452	422671	563285	900271	463387	695086	1.25058e+06	960167	1.05341e+06	932273	518939	715376	964366	Prenol lipids	104012-37-5	HMDB0040953	-	-	-	-
Com_4665_pos	朽-L-Glutamyl-L-glutamic acid	--	C10 H16 N2 O7	1.379	260.076	6.76685e+06	7.08133e+06	1.4064e+07	1.07144e+07	1.14636e+07	1.0565e+07	1.28213e+07	1.14175e+07	8.59335e+06	9.80371e+06	9.6075e+06	1.05884e+07	1.04124e+07	8.71031e+06	1.37415e+07	--	--	--	-	-	-	-
Com_16683_pos	--	6-Gingerol	C17 H26 O4	7.073	611.356	335608	298892	356054	250907	289796	227438	168723	235895	189309	178310	403739	189362	365228	235947	188895	Phenols	58253-27-3	HMDB0005783	C10462	ko01110//Biosynthesis of secondary metabolites;ko00945//Stilbenoid, diarylheptanoid and gingerol biosynthesis	Biosynthesis of other secondary metabolites;Global and overview maps	Metabolism
Com_1010_pos	(+)-ar-Turmerone	--	C15 H20 O	6.38	217.158	8.82623e+07	7.74233e+07	7.4754e+07	9.6022e+07	6.31904e+07	5.9152e+07	6.2152e+07	5.59351e+07	9.54047e+07	7.50502e+07	8.63391e+07	7.63979e+07	8.56395e+07	7.21941e+07	8.58643e+07	--	--	--	-	-	-	-
Com_7773_pos	Estriol	--	C18 H24 O3	10.02	289.18	4.1572e+06	4.14103e+06	5.24581e+06	4.92052e+06	6.18974e+06	6.80195e+06	4.59e+06	3.61059e+06	3.50685e+06	2.65027e+06	3.00394e+06	2.58753e+06	5.09596e+06	4.48943e+06	4.15057e+06	Steroids and steroid derivatives	547-81-9	HMDB0000347	C05141	ko01100//Metabolic pathways	Global and overview maps	Metabolism
Com_6_pos	Palmitoleic Acid	--	C16 H30 O2	7.534	277.215	1.38027e+10	1.33807e+10	1.66488e+10	1.53628e+10	1.17033e+10	1.15236e+10	1.51128e+10	1.48244e+10	1.54264e+10	1.48135e+10	1.40051e+10	1.40057e+10	1.42274e+10	1.45829e+10	1.49252e+10	Fatty Acyls	10030-73-6	HMDB0012328	C08362	ko00061//Fatty acid biosynthesis	Lipid metabolism	Metabolism
Com_5129_pos	--	Timosaponin A1	C33 H54 O8	8.619	579.39	3.24296e+06	3.39308e+06	3.44303e+06	3.04749e+06	3.59794e+06	3.55476e+06	1.09429e+07	1.47413e+07	1.13998e+07	1.36381e+07	5.71423e+06	7.14719e+06	7.73264e+06	7.69015e+06	7.00287e+06	--	--	--	-	-	-	-
Com_16210_pos	--	Tanshinone I	C18 H12 O3	4.015	277.085	396849	311793	275639	145188	391206	386928	300511	331766	784891	572740	559267	577841	254429	332843	369553	--	--	--	-	-	-	-
Com_8276_pos	Esculetin	--	C9 H6 O4	4.791	197.044	2.37505e+06	2.82264e+06	2.93775e+06	2.43562e+06	4.33623e+06	4.13821e+06	4.01871e+06	3.82155e+06	3.40205e+06	3.38306e+06	7.03878e+06	6.36895e+06	3.63155e+06	4.06378e+06	4.34899e+06	Coumarins and derivatives	305-01-1	HMDB0030819	-	-	-	-
Com_9932_pos	Homoveratrylamine	--	C10 H15 N O2	5.304	182.117	2.5053e+06	2.50292e+06	3.01457e+06	3.60032e+06	2.78331e+06	2.37724e+06	3.14055e+06	3.34998e+06	3.27373e+06	3.81202e+06	2.85238e+06	2.54506e+06	2.70476e+06	3.11086e+06	3.10896e+06	Benzene and substituted derivatives	120-20-7	HMDB0041806	-	-	-	-
Com_2987_pos	Lithocholic Acid	--	C24 H40 O3	8.329	415.256	2.91032e+07	2.75919e+07	1.22618e+06	1.00035e+06	5.94359e+06	7.47699e+06	595584	314564	2.97761e+06	2.83703e+06	624785	870288	5.74406e+06	5.94237e+06	5.79518e+06	Lipids and lipid-like molecules	434-13-9	HMDB0000761	-	-	-	-
Com_1884_pos	PC (2:0/16:3)	--	C26 H46 N O8 P	6.382	532.303	1.45754e+07	9.41816e+06	1.14472e+07	1.23231e+07	4.63344e+07	4.53828e+07	3.31712e+07	3.09436e+07	1.77946e+07	1.94063e+07	6.23635e+07	5.99054e+07	3.89277e+07	2.69367e+07	3.37393e+07	--	--	--	-	-	-	-
Com_12841_pos	--	Lupulin A	C30 H46 O11	6.783	583.308	1.18198e+06	1.59132e+06	1.84455e+06	1.9077e+06	1.17478e+06	1.16977e+06	1.34492e+06	2.0614e+06	1.37957e+06	1.37997e+06	960517	1.39617e+06	1.41069e+06	1.29846e+06	1.3388e+06	--	--	--	-	-	-	-
Com_10480_pos	--	Glutathione	C10 H17 N3 O6 S	4.934	308.091	3.03301e+06	3.59343e+06	1.23173e+06	1.28408e+06	1.3196e+06	1.87006e+06	2.00521e+06	2.28288e+06	3.0036e+06	3.13843e+06	1.88831e+06	1.99752e+06	2.05316e+06	2.3103e+06	2.24366e+06	Carboxylic acids and derivatives	-	HMDB0062697	C00051	ko01100//Metabolic pathways;ko02010//ABC transporters;ko00270//Cysteine and methionine metabolism;ko00480//Glutathione metabolism	Amino acid metabolism;Global and overview maps;Membrane transport;Metabolism of other amino acids	Environmental Information Processing;Metabolism
Com_1267_pos	--	Tianshic acid	C18 H37 N O5	6.293	348.274	6.4016e+07	5.68782e+07	6.85617e+07	7.2924e+07	3.19934e+07	3.55959e+07	4.45281e+07	3.7979e+07	5.74536e+07	5.19963e+07	4.54613e+07	4.25951e+07	6.46019e+07	5.61396e+07	5.51084e+07	--	--	--	-	-	-	-
Com_6276_pos	3-n-Butylphathlide	--	C12 H14 O2	6.529	191.106	4.54042e+06	4.15891e+06	4.66102e+06	3.10947e+06	9.86998e+06	9.34124e+06	7.71609e+06	6.92389e+06	3.31027e+06	3.44172e+06	6.91731e+06	5.6898e+06	5.88612e+06	5.50069e+06	5.8462e+06	--	--	--	-	-	-	-
Com_11736_pos	Morellic acid	--	C33 H36 O8	5.497	539.269	922603	1.12814e+06	1.591e+06	2.45005e+06	1.50954e+06	1.48286e+06	1.84229e+06	1.29377e+06	1.87065e+06	1.95126e+06	1.44215e+06	1.68112e+06	2.06677e+06	1.58537e+06	1.57473e+06	--	--	--	-	-	-	-
Com_3801_pos	Noroxycodone-d3	--	C17 H16 [2]H3 N O4	5.146	305.159	1.5249e+07	2.00083e+07	9.64772e+06	8.15224e+06	1.71487e+07	2.0271e+07	1.48314e+07	1.26887e+07	1.74922e+07	1.80496e+07	1.49203e+07	1.6293e+07	1.5469e+07	1.98205e+07	1.83561e+07	--	--	--	-	-	-	-
Com_15828_pos	--	trans-Zeatin-riboside	C15 H21 N5 O5	5.463	720.345	323212	318674	325707	305815	872342	623520	380019	338729	374707	328245	366538	370193	483360	546656	501379	--	--	--	-	-	-	-
Com_2598_pos	3,4-Dimethoxy-汐-pyrrolidinopentiophenone	--	C17 H25 N O3	5.344	292.19	2.60785e+07	2.6079e+07	2.02968e+07	2.05546e+07	3.51316e+07	3.38729e+07	2.80747e+07	2.75301e+07	2.57687e+07	2.63299e+07	3.02411e+07	2.74777e+07	2.85428e+07	2.72157e+07	3.09417e+07	--	--	--	-	-	-	-
Com_3925_pos	--	1-Aminocyclopropanecarboxylic acid	C4 H7 N O2	1.38	102.055	1.61538e+07	1.31732e+07	1.30546e+07	9.36505e+06	1.74689e+07	1.76794e+07	1.32557e+07	1.44257e+07	1.4657e+07	1.46891e+07	2.33456e+07	1.9611e+07	1.55198e+07	1.5003e+07	1.8001e+07	Carboxylic acids and derivatives	22059-21-8	HMDB0036458	C01234	ko01100//Metabolic pathways;ko01110//Biosynthesis of secondary metabolites;ko00270//Cysteine and methionine metabolism	Amino acid metabolism;Global and overview maps	Metabolism
Com_3370_pos	Indirubin	--	C16 H10 N2 O2	5.181	263.076	2.07839e+07	2.04837e+07	9.71974e+06	8.86684e+06	1.42542e+07	1.2819e+07	9.21216e+06	9.36451e+06	1.38072e+07	1.34908e+07	2.87562e+07	2.5711e+07	1.56197e+07	1.44653e+07	1.73194e+07	--	--	--	-	-	-	-
Com_5899_pos	Lagochilin	--	C20 H36 O5	5.581	357.263	4.63176e+06	4.60836e+06	4.13572e+06	4.98735e+06	8.31359e+06	8.14709e+06	5.72171e+06	4.62422e+06	5.82263e+06	5.92812e+06	1.00087e+07	1.23832e+07	6.88342e+06	7.75908e+06	7.19382e+06	--	--	--	-	-	-	-
Com_659_pos	SM (d14:0/12:1)	--	C31 H63 N2 O6 P	7.921	591.462	8.98933e+07	8.90772e+07	1.56185e+08	1.45196e+08	2.80915e+07	2.56727e+07	9.69331e+07	9.09555e+07	9.15415e+07	1.00797e+08	5.64788e+07	5.30978e+07	8.32873e+07	8.328e+07	8.74407e+07	--	--	--	-	-	-	-
Com_2076_pos	1-(4-benzylpiperazino)-2-(pyridin-2-ylamino)propan-1-one	--	C19 H24 N4 O	5.03	363.162	1.35703e+07	1.26522e+07	1.21388e+07	8.53019e+06	4.77127e+07	4.18346e+07	2.32264e+07	2.15816e+07	2.39363e+07	2.49464e+07	2.7947e+07	2.7664e+07	2.32183e+07	2.49574e+07	2.55534e+07	--	--	--	-	-	-	-
Com_8102_pos	5-nitro-2-furaldehyde 2,2-dimethylhydrazone	--	C7 H9 N3 O3	9.125	184.073	3.64848e+06	3.15427e+06	5.16322e+06	5.36059e+06	2.32484e+06	2.36428e+06	4.96507e+06	4.81847e+06	4.8726e+06	5.01695e+06	4.12203e+06	3.45314e+06	4.97767e+06	3.44872e+06	4.92267e+06	--	--	--	-	-	-	-
Com_3292_pos	Zeatin-7-N-glucoside	--	C16 H23 N5 O6	4.946	382.171	2.58922e+07	2.38826e+07	1.24415e+07	1.15361e+07	2.03298e+07	2.00595e+07	1.35105e+07	1.65182e+07	2.04735e+07	1.41943e+07	2.19689e+07	2.51856e+07	2.04323e+07	1.90715e+07	1.91687e+07	--	--	--	-	-	-	-
Com_14143_pos	--	Lysopc 17:0	C25 H52 N O7 P	9.574	510.355	1.43273e+06	919727	987038	1.14595e+06	1.15866e+06	1.62445e+06	1.24005e+06	512614	953764	1.04844e+06	633497	718380	947276	897307	1.24366e+06	--	--	--	-	-	-	-
Com_3477_pos	N'-[(2,4-dihydroxyphenyl)methylene]-4-methylbenzenesulfonohydrazide	--	C14 H14 N2 O4 S	1.401	307.078	9.58827e+06	7.18139e+06	4.98089e+06	3.82552e+06	1.67782e+07	1.51656e+07	7.2598e+06	8.18202e+06	1.04612e+07	1.03648e+07	2.75125e+07	2.62439e+07	8.49161e+06	8.35894e+06	1.02177e+07	--	--	--	-	-	-	-
Com_12276_pos	Delsoline	--	C25 H41 N O7	8.985	468.298	1.9762e+06	1.78708e+06	1.41486e+06	1.40481e+06	494582	367094	724112	1.00609e+06	2.81353e+06	2.84707e+06	1.13894e+06	1.46123e+06	1.30725e+06	943915	1.42089e+06	--	--	--	-	-	-	-
Com_12228_pos	Diosbulbin B	--	C19 H20 O6	4.825	362.155	2.302e+06	2.08332e+06	1.98596e+06	2.20891e+06	1.3634e+06	2.34962e+06	2.2929e+06	1.89717e+06	1.54077e+06	1.92907e+06	1.25165e+06	1.46273e+06	1.58676e+06	1.62458e+06	2.06133e+06	Naphthofurans	20086-06-0	HMDB0036777	-	-	-	-
Com_12403_pos	--	Glycyrrhetinic acid	C30 H46 O4	8.714	471.345	1.99792e+06	1.80741e+06	2.24216e+06	1.74077e+06	2.2117e+06	2.37749e+06	1.1021e+06	1.55782e+06	1.119e+06	1.75451e+06	1.71221e+06	1.94667e+06	2.10636e+06	1.76172e+06	2.08945e+06	Prenol lipids	471-53-4	HMDB0011628	-	-	-	-
Com_470_pos	Idebenone	--	C19 H30 O5	6.15	339.216	2.31721e+08	2.27016e+08	1.99719e+08	1.94867e+08	1.10022e+08	1.25014e+08	1.25601e+08	9.11452e+07	1.66955e+08	1.75397e+08	1.6793e+08	1.5821e+08	1.7469e+08	1.79354e+08	1.75442e+08	--	--	--	-	-	-	-
Com_196_pos	(12Z)-9,10,11-trihydroxyoctadec-12-enoic acid	--	C18 H34 O5	6.294	353.229	4.87337e+08	4.52679e+08	5.66492e+08	5.72559e+08	2.90337e+08	2.91589e+08	4.37987e+08	3.90285e+08	3.50405e+08	4.18482e+08	3.29668e+08	3.45627e+08	4.66983e+08	4.18847e+08	5.28669e+08	--	--	--	-	-	-	-
Com_7488_pos	--	Isomucronulatol	C17 H18 O5	5.379	303.122	5.07858e+06	5.7382e+06	4.41204e+06	4.65715e+06	4.81035e+06	6.05254e+06	4.38302e+06	4.53241e+06	8.16732e+06	7.67854e+06	6.78227e+06	6.66599e+06	5.00302e+06	5.42462e+06	5.83271e+06	Isoflavonoids	64474-51-7	HMDB0033189	-	-	-	-
Com_10985_pos	--	Dehydropachymic Acid	C33 H50 O5	8.112	527.372	2.77771e+06	3.21409e+06	2.13359e+06	2.62866e+06	2.52352e+06	2.58592e+06	2.30642e+06	2.22316e+06	1.97133e+06	2.58698e+06	2.15413e+06	2.65932e+06	2.28095e+06	2.36497e+06	2.27575e+06	--	--	--	-	-	-	-
Com_2747_pos	2-[(3S)-1-(3,4-Difluorobenzyl)-3-pyrrolidinyl]-1,3-benzoxazole	--	C18 H16 F2 N2 O	5.713	315.133	8.64576e+06	7.36171e+06	6.16935e+06	6.28598e+06	2.83065e+07	3.2324e+07	1.11505e+07	1.06013e+07	1.45979e+07	1.38209e+07	1.86552e+07	1.47427e+07	1.55055e+07	1.53937e+07	1.46809e+07	--	--	--	-	-	-	-
Com_13443_pos	Acetyl-11-keto-汕-boswellic acid	--	C32 H48 O5	8.649	513.356	1.03862e+06	1.35843e+06	1.50195e+06	1.65066e+06	779365	966729	922331	951240	855773	1.40469e+06	970605	845237	1.19828e+06	981128	1.19077e+06	--	--	--	-	-	-	-
Com_15341_pos	Cimigenol-3-O-汐-L-arabinoside	--	C35 H56 O9	10.191	621.41	92919.9	87690.4	734987	633133	609314	515010	311853	291641	103323	160297	157526	105828	831805	833135	1.14857e+06	--	--	--	-	-	-	-
Com_16420_pos	Lithosprmoside	--	C14 H19 N O8	5.266	330.118	350938	411704	407257	266008	327262	319129	381873	354639	313296	435452	369398	377365	587309	413683	406716	--	--	--	-	-	-	-
Com_1793_pos	--	Momordin Ic	C41 H64 O13	8.637	765.438	9.94542e+06	8.55156e+06	7.18904e+06	6.94753e+06	1.31101e+07	1.28411e+07	6.48117e+07	6.00272e+07	4.59022e+07	4.8775e+07	5.21575e+07	5.18647e+07	2.47404e+07	2.96004e+07	2.88559e+07	--	--	--	-	-	-	-
Com_6091_pos	Cocaethylene	--	C18 H23 N O4	5.105	318.165	8.29366e+06	7.70826e+06	9.28227e+06	8.62454e+06	4.80417e+06	5.58902e+06	7.46399e+06	765331	7.40643e+06	5.03882e+06	4.33503e+06	5.76266e+06	6.55186e+06	6.47602e+06	7.19341e+06	Benzene and substituted derivatives	529-38-4	HMDB0041860	-	-	-	-
Com_1582_pos	4-Phenyl-3-buten-2-one	--	C10 H10 O	6.37	147.08	5.61894e+07	6.26055e+07	5.2474e+07	5.05627e+07	4.45654e+07	3.96524e+07	2.70777e+07	2.81386e+07	5.11512e+07	4.0337e+07	3.626e+07	6.71085e+07	4.22974e+07	6.08899e+07	4.20076e+07	Benzene and substituted derivatives	-	HMDB0141081	-	-	-	-
Com_8437_pos	Muscone	--	C16 H30 O	8.881	239.236	1.56291e+06	1.69836e+06	1.66623e+06	1.88845e+06	1.99884e+06	2.92762e+06	6.59868e+06	6.04197e+06	4.66074e+06	4.39123e+06	2.2433e+06	2.42619e+06	2.54905e+06	3.29226e+06	3.17485e+06	Carbonyl compounds	541-91-3	HMDB0034181	-	-	-	-
Com_16353_pos	--	Gly-Tyr	C11 H14 N2 O4	5	239.102	408360	425346	529400	530299	504313	416395	451883	389276	441858	403398	649118	647325	298892	386156	560844	Carboxylic acids and derivatives	658-79-7	HMDB0028853	-	-	-	-
Com_1333_pos	N-Methylparoxetine	--	C20 H22 F N O3	5.354	344.17	4.04857e+07	4.23347e+07	3.43971e+07	3.25957e+07	4.01928e+07	4.72458e+07	5.76435e+07	4.92308e+07	4.94068e+07	4.97466e+07	9.37748e+07	8.54953e+07	7.26523e+07	4.88418e+07	5.11493e+07	--	--	--	-	-	-	-
Com_4764_pos	Dehydronuciferin	--	C19 H19 N O2	5.078	294.144	1.54868e+07	1.22487e+07	1.02981e+07	1.02187e+07	5.43663e+06	5.93328e+06	9.07103e+06	1.20263e+07	6.80363e+06	6.11362e+06	7.72443e+06	9.37711e+06	7.89859e+06	8.44685e+06	6.77581e+06	--	--	--	-	-	-	-
Com_1364_pos	Euphorbiasteroid	--	C32 H40 O8	5.67	553.284	4.34213e+07	4.82282e+07	6.77653e+07	6.68538e+07	5.89671e+07	5.99828e+07	5.85501e+07	5.85625e+07	6.3037e+07	5.988e+07	4.85795e+07	4.83042e+07	6.32748e+07	6.17051e+07	5.33815e+07	--	--	--	-	-	-	-
Com_1085_pos	--	Ferruginol	C20 H30 O	6.195	287.236	8.79308e+07	9.95066e+07	1.59512e+07	9.91049e+06	5.00522e+07	4.26783e+07	1.92987e+07	1.75157e+07	1.98099e+07	2.03498e+07	7.12017e+07	6.04723e+07	5.34007e+07	4.66591e+07	4.14651e+07	--	--	--	C09092	ko01110//Biosynthesis of secondary metabolites;ko00904//Diterpenoid biosynthesis	Global and overview maps;Metabolism of terpenoids and polyketides	Metabolism
Com_3849_pos	--	Timosaponin A3	C39 H64 O13	8.626	741.442	2.09982e+06	2.15769e+06	2.42086e+06	2.63791e+06	2.80829e+06	3.40022e+06	2.24773e+07	1.88453e+07	2.02844e+07	2.27467e+07	1.034e+07	1.0047e+07	9.04e+06	1.05049e+07	1.11005e+07	--	--	--	-	-	-	-
Com_6272_pos	(+)-Corynoline	--	C21 H21 N O5	4.991	368.155	9.37183e+06	7.91213e+06	6.15258e+06	6.11315e+06	4.80957e+06	4.93216e+06	5.33535e+06	5.61233e+06	7.87086e+06	7.09803e+06	1.14371e+07	9.62945e+06	7.70551e+06	8.07551e+06	7.10029e+06	--	--	--	-	-	-	-
Com_5056_pos	Leonurine	--	C14 H21 N3 O5	4.915	312.156	2.29498e+06	1.7632e+06	1.82626e+06	1.78658e+06	1.27847e+07	1.40055e+07	2.14937e+06	2.47231e+06	2.71102e+06	3.07125e+06	4.56272e+06	3.17793e+06	4.26921e+06	4.62139e+06	4.99553e+06	--	--	--	-	-	-	-
Com_6609_pos	--	6-Phosphogluconic acid	C6 H13 O10 P	1.33	277.031	2.16172e+06	1.93703e+06	1.7505e+06	1.55375e+06	3.14173e+06	2.4917e+06	3.8779e+06	9.72243e+06	2.3373e+06	2.8539e+06	4.34405e+06	4.60061e+06	2.22811e+06	3.03833e+06	2.80832e+06	Organooxygen compounds	921-62-0	HMDB0001316	C00345	ko01100//Metabolic pathways;ko01110//Biosynthesis of secondary metabolites;ko01120//Microbial metabolism in diverse environments;ko01130//Biosynthesis of antibiotics;ko01200//Carbon metabolism;ko00030//Pentose phosphate pathway	Carbohydrate metabolism;Global and overview maps	Metabolism
Com_1683_pos	Jasminoside B	--	C16 H26 O8	5.592	347.167	2.39392e+07	1.67117e+07	1.28219e+07	1.28658e+07	6.14658e+07	5.55952e+07	3.05409e+07	2.86303e+07	2.77007e+07	3.22014e+07	3.28532e+07	2.88559e+07	3.13555e+07	3.30615e+07	3.08361e+07	--	--	--	-	-	-	-
Com_12622_pos	Astragaloside II	--	C43 H70 O15	9.846	827.49	197072	392055	512392	305516	872326	691545	2.66459e+06	2.55258e+06	1.66242e+06	1.00537e+06	665327	658923	986810	869166	465900	--	--	--	-	-	-	-
Com_13412_pos	Eupalinolide A	--	C24 H30 O9	10.72	463.201	1.92408e+06	1.78546e+06	1.28877e+06	1.35442e+06	1.4949e+06	1.55954e+06	2.20731e+06	2.03432e+06	1.65911e+06	2.06711e+06	2.11265e+06	1.79779e+06	1.63537e+06	1.87034e+06	1.90505e+06	--	--	--	-	-	-	-
Com_8722_pos	6汕-Hydroxy-21-desacetyl deflazacort	--	C23 H29 N O6	5.99	434.225	3.53789e+06	3.86881e+06	4.14783e+06	4.66695e+06	2.70716e+06	2.94517e+06	2.61922e+06	2.65304e+06	3.81738e+06	3.52141e+06	3.84911e+06	4.18627e+06	3.28728e+06	3.54979e+06	3.75545e+06	--	--	--	-	-	-	-
Com_11898_pos	7-hydroxy-5-methoxy-2-phenyl-3,4-dihydro-2H-1-benzopyran-4-one	--	C16 H14 O4	5.517	311.09	1.16239e+06	1.45832e+06	2.25168e+06	2.36901e+06	1.27582e+06	921372	1.53122e+06	1.48454e+06	2.16353e+06	2.22474e+06	1.53825e+06	1.73681e+06	1.70663e+06	1.38556e+06	1.54285e+06	--	--	--	-	-	-	-
Com_13785_pos	--	B Liriopesides B	C39 H62 O12	7.066	723.431	934215	764399	688493	709147	697925	597634	1.96086e+06	1.90784e+06	1.50984e+06	1.39513e+06	1.63739e+06	1.7361e+06	1.60584e+06	1.33237e+06	1.56793e+06	--	--	--	-	-	-	-
Com_13897_pos	--	Succinic anhydride	C4 H4 O3	5.45	101.023	1.39026e+06	1.31629e+06	1.2461e+06	1.1043e+06	1.19664e+06	1.72818e+06	1.59938e+06	1.25463e+06	1.7859e+06	1.57467e+06	1.59119e+06	1.42701e+06	1.72608e+06	1.41468e+06	1.39132e+06	Oxolanes	108-30-5	HMDB0032523	-	-	-	-
Com_10730_pos	PC (16:2e/3:0)	--	C27 H52 N O7 P	9.24	534.355	2.02542e+06	2.09664e+06	2.27047e+06	1.84846e+06	2.36652e+06	2.19182e+06	3.32054e+06	2.43388e+06	3.43819e+06	3.49048e+06	3.1564e+06	2.81301e+06	2.69794e+06	3.01422e+06	3.74072e+06	--	--	--	-	-	-	-
Com_15297_pos	PE (18:5e/8:0)	--	C31 H54 N O7 P	10.587	584.382	681464	528968	501639	320013	135907	138538	169538	169593	1.24943e+06	1.21505e+06	306300	266173	291580	426388	567189	--	--	--	-	-	-	-
Com_538_pos	2,4-Dimethylbenzaldehyde	--	C9 H10 O	6.336	135.08	2.01043e+08	1.93865e+08	1.80404e+08	1.77608e+08	1.35882e+08	1.50046e+08	1.93731e+08	1.834e+08	1.93481e+08	1.86119e+08	2.26734e+08	1.91578e+08	1.87306e+08	1.51395e+08	1.68966e+08	Benzene and substituted derivatives	15764-16-6	HMDB0032142	-	-	-	-
Com_1731_pos	--	Dihydrocapsaicin	C18 H29 N O3	7.54	308.221	1.57387e+07	1.05911e+07	5.30515e+07	4.35513e+07	2.22362e+07	1.71463e+07	2.09764e+07	7.07602e+06	1.97418e+07	1.16367e+07	1.76683e+07	1.20335e+07	2.20053e+07	1.63736e+07	1.65521e+07	Benzene and substituted derivatives	19408-84-5	HMDB0038457	-	-	-	-
Com_7295_pos	--	N-(9H-Purin-6-ylcarbamoyl)threonine	C10 H12 N6 O4	5.065	281.099	4.82295e+06	4.21069e+06	5.01909e+06	3.77765e+06	7.63693e+06	6.79681e+06	5.07293e+06	4.93155e+06	5.66199e+06	5.69709e+06	7.76279e+06	6.73395e+06	6.12284e+06	5.46914e+06	5.35634e+06	--	--	--	-	-	-	-
Com_182_pos	--	Bakuchiol	C18 H24 O	6.26	257.189	7.37909e+08	5.82781e+08	4.75735e+08	4.98683e+08	5.36609e+08	5.08735e+08	3.51404e+08	3.62839e+08	3.48085e+08	5.19591e+08	3.90174e+08	3.71627e+08	5.18947e+08	3.13314e+08	3.36603e+08	--	--	--	-	-	-	-
Com_3170_pos	N2-Acetyl-L-ornithine	--	C7 H14 N2 O3	5.515	175.111	2.26287e+07	1.89165e+07	1.9918e+07	2.05669e+07	1.79497e+07	2.68711e+07	2.91578e+07	2.45517e+07	1.10979e+07	2.94487e+07	3.1173e+07	1.97104e+07	2.59764e+07	2.64221e+07	2.6051e+07	Carboxylic acids and derivatives	1572591	HMDB0003357	C00437	ko01100//Metabolic pathways;ko01110//Biosynthesis of secondary metabolites;ko01130//Biosynthesis of antibiotics;ko01230//Biosynthesis of amino acids;ko01210//2-Oxocarboxylic acid metabolism;ko00220//Arginine biosynthesis	Amino acid metabolism;Global and overview maps	Metabolism
Com_1671_pos	Linarin	--	C28 H32 O14	5.077	593.197	1.24076e+07	1.13044e+07	2.89526e+07	2.85039e+07	6.18574e+07	6.11295e+07	4.23142e+07	3.78048e+07	5.08531e+07	5.12985e+07	1.411e+07	1.44392e+07	4.03288e+07	4.11825e+07	4.00554e+07	--	--	--	-	-	-	-
Com_8135_pos	--	Methyl linolenate	C19 H32 O2	5.817	293.247	4.14823e+06	3.40404e+06	4.04718e+06	3.86386e+06	6.29973e+06	6.21293e+06	4.31897e+06	4.3338e+06	4.66815e+06	4.9206e+06	6.58988e+06	5.5016e+06	5.74267e+06	4.17796e+06	5.39387e+06	--	--	--	-	-	-	-
Com_10285_pos	Azelastine	--	C22 H24 Cl N3 O	7.87	382.175	3.19031e+06	2.44639e+06	2.97366e+06	3.34304e+06	2.87258e+06	1.69991e+06	1.98406e+06	3.08863e+06	2.28752e+06	1.82237e+06	2.01097e+06	2.45247e+06	2.34659e+06	2.49291e+06	2.29785e+06	Diazanaphthalenes	58581-89-8	HMDB0015107	-	-	-	-
Com_15667_pos	Biochanin A	--	C16 H12 O5	5.435	285.075	710585	456411	332272	421927	551272	489229	1.07248e+06	393997	911357	414995	380444	446222	361982	415487	432828	Isoflavonoids	491-80-5	HMDB0002338	C00814	ko01110//Biosynthesis of secondary metabolites;ko00943//Isoflavonoid biosynthesis	Biosynthesis of other secondary metabolites;Global and overview maps	Metabolism
Com_2201_pos	Isoquinoline	--	C9 H7 N	5.089	148.075	1.947e+07	1.75949e+07	1.46488e+07	1.26428e+07	4.40589e+07	4.06552e+07	2.41259e+07	1.90468e+07	2.50224e+07	2.59901e+07	1.78834e+07	1.60859e+07	2.26252e+07	2.62743e+07	2.65167e+07	Isoquinolines and derivatives	119-65-3	HMDB0034244	-	-	-	-
Com_5856_pos	Epigallocatechin	--	C15 H14 O7	4.902	307.081	874004	809921	736694	612926	2.36127e+06	2.31332e+06	1.66495e+06	1.18849e+07	931596	1.17943e+06	3.23227e+06	3.1209e+06	1.41428e+06	1.58331e+06	1.41548e+06	Flavonoids	-	HMDB0141542	C12136	ko01110//Biosynthesis of secondary metabolites;ko00941//Flavonoid biosynthesis	Biosynthesis of other secondary metabolites;Global and overview maps	Metabolism
Com_8873_pos	--	3-Butylidenephthalide	C12 H12 O2	6.77	189.091	2.41157e+06	2.09618e+06	2.05006e+06	2.0654e+06	4.7479e+06	5.30505e+06	2.73839e+06	3.11196e+06	1.89619e+06	2.09122e+06	2.13813e+06	2.411e+06	2.65876e+06	2.54684e+06	3.01597e+06	--	--	--	-	-	-	-
Com_6254_pos	27-Deoxyactein	--	C37 H56 O10	9.609	661.384	3.88736e+06	4.85442e+06	3.53213e+06	3.31177e+06	9.48034e+06	9.91497e+06	5.13341e+06	4.11594e+06	3.40727e+06	3.91724e+06	3.63237e+06	1.80923e+06	4.01767e+06	5.4019e+06	6.43151e+06	--	--	--	-	-	-	-
Com_7922_pos	--	Oryzalexin E	C20 H32 O2	7.337	305.247	6.06168e+06	5.3927e+06	4.95634e+06	5.56782e+06	4.40476e+06	5.67109e+06	3.8309e+06	3.31349e+06	3.49177e+06	3.34713e+06	4.15616e+06	4.02218e+06	4.73998e+06	4.99315e+06	5.16601e+06	Phenanthrenes and derivatives	150943-96-7	HMDB0039702	C21561	ko01110//Biosynthesis of secondary metabolites	Global and overview maps	Metabolism
Com_5744_pos	Simvastatin	--	C25 H38 O5	6.909	419.277	7.54405e+06	1.09287e+07	8.37182e+06	7.65822e+06	8.65308e+06	7.55919e+06	7.73141e+06	6.44523e+06	1.96314e+06	1.0434e+07	1.2625e+06	1.0428e+07	9.67493e+06	8.58302e+06	1.05988e+07	Lactones	79902-63-9	HMDB0005007	-	-	-	-
Com_2138_pos	汐-Linolenoyl ethanolamide	--	C20 H35 N O2	8.722	322.273	4.29355e+07	4.18534e+07	3.59961e+07	3.60043e+07	4.6097e+07	4.54565e+07	1.79925e+07	1.70678e+07	1.18868e+07	1.31067e+07	2.20701e+07	2.22196e+07	2.78063e+07	3.00784e+07	3.2479e+07	--	--	--	-	-	-	-
Com_3248_pos	4-chloro-5-morpholino-2-quinoxalin-2-ylpyridazin-3(2H)-one	--	C16 H14 Cl N5 O2	2.03	344.091	1.08943e+07	1.1093e+07	1.04388e+07	9.71931e+06	1.70754e+07	2.12522e+07	2.11474e+07	1.91323e+07	1.08418e+07	1.29942e+07	3.01013e+07	2.92876e+07	1.26023e+07	1.52691e+07	1.86676e+07	--	--	--	-	-	-	-
Com_5453_pos	Daurisoline	--	C37 H42 N2 O6	5.088	611.317	1.22808e+06	996799	1.6506e+06	1.45929e+06	3.52203e+06	1.24142e+07	3.71725e+06	2.58845e+06	4.07574e+06	3.77425e+06	3.46338e+06	3.78417e+06	5.56181e+06	3.95619e+06	4.39047e+06	--	--	--	-	-	-	-
Com_8561_pos	Ifenprodil	--	C21 H27 N O2	5.209	326.207	2.95781e+06	3.17076e+06	3.92823e+06	3.86856e+06	5.20381e+06	5.69716e+06	2.77932e+06	2.38574e+06	2.3798e+06	2.67424e+06	2.20695e+06	2.55792e+06	2.95953e+06	3.50503e+06	3.87478e+06	--	--	--	-	-	-	-
Com_2841_pos	PE (8:0/18:3)	--	C31 H56 N O8 P	8.399	602.389	3.9079e+06	4.823e+06	4.13832e+06	3.48146e+06	6.76698e+06	6.07555e+06	3.48198e+07	3.28402e+07	1.98886e+07	2.19428e+07	1.00042e+07	1.03231e+07	1.14576e+07	1.14145e+07	8.85257e+06	--	--	--	-	-	-	-
Com_1824_pos	Flunitrazepam-d3	--	C16 H9 [2]H3 F N3 O3	5.286	334.139	1.57322e+07	1.7907e+07	1.54945e+07	1.66166e+07	5.63081e+07	5.39481e+07	1.23684e+07	1.20137e+07	1.43837e+07	1.73835e+07	1.04772e+07	9.85816e+06	2.25497e+07	2.17485e+07	2.27509e+07	--	--	--	-	-	-	-
Com_11239_pos	4-(2,3-dihydro-1,4-benzodioxin-6-yl)butanoic acid	--	C12 H14 O4	5.455	223.1	2.39191e+06	2.14818e+06	1.34169e+06	2.70734e+06	640197	633054	594346	542952	1.77366e+06	1.81185e+06	568386	902511	549028	690470	576327	--	--	--	-	-	-	-
Com_5154_pos	--	Ipriflavone	C18 H16 O3	6.474	281.117	1.04543e+07	9.43669e+06	1.22025e+07	9.67402e+06	1.24379e+07	9.56907e+06	1.11669e+07	1.15737e+07	1.34315e+07	1.266e+07	1.23952e+07	1.39365e+07	1.28219e+07	1.14263e+07	1.09499e+07	Isoflavonoids	35212-22-7	HMDB0032987	-	-	-	-
Com_69_pos	9-Oxo-ODE	--	C18 H30 O3	7.827	295.226	2.0873e+09	1.95482e+09	1.49322e+09	1.79365e+09	9.72297e+08	9.76736e+08	1.20084e+09	1.21098e+09	9.93825e+08	1.11045e+09	1.2319e+09	1.24426e+09	1406190131	1.31089e+09	1.44952e+09	Fatty Acyls	-	HMDB0004669	C14766	ko00591//Linoleic acid metabolism	Lipid metabolism	Metabolism
Com_6280_pos	(-)-Epigallocatechin gallate	--	C22 H18 O11	5.859	459.089	2.70105e+06	2.60136e+06	2.15152e+06	2.27339e+06	9.38436e+06	9.81608e+06	9.06793e+06	8.93006e+06	2.71307e+06	2.82494e+06	7.04398e+06	6.18718e+06	6.82802e+06	5.35965e+06	5.35592e+06	--	--	--	-	-	-	-
Com_1372_pos	6 汕-Hydroxycortisol	--	C21 H30 O6	6.6	361.198	7.9642e+07	7.24892e+07	6.87751e+07	6.13069e+07	4.14828e+07	3.80685e+07	4.18797e+07	3.5059e+07	6.82819e+07	6.88055e+07	5.22922e+07	5.0009e+07	5.96158e+07	6.58245e+07	6.28949e+07	--	--	--	-	-	-	-
Com_2630_pos	TPH	--	C15 H23 N5 O5	2.252	336.166	2.0953e+07	2.00214e+07	1.70972e+07	1.24572e+07	3.44752e+07	3.24025e+07	2.52092e+07	1.17677e+07	2.87399e+07	1.32276e+07	3.17397e+07	2.98842e+07	1.25992e+07	1.28859e+07	2.11709e+07	--	--	--	-	-	-	-
Com_851_pos	DGTS (6:0/20:4)	--	C36 H61 N O7	8.931	620.452	1.19109e+08	1.03414e+08	1.19746e+08	1.07543e+08	1.20756e+08	8.28031e+07	8.74796e+07	5.13691e+07	1.21959e+08	6.2442e+07	1.00963e+08	8.04246e+07	7.97143e+07	1.12097e+08	1.20883e+08	--	--	--	-	-	-	-
Com_14731_pos	Xanthine	--	C5 H4 N4 O2	4.101	153.041	857445	855583	1.21295e+06	918586	852111	967540	1.38302e+06	1.18693e+06	1.22279e+06	1.05029e+06	598833	652203	976070	1.16066e+06	943962	Imidazopyrimidines	69-89-6	HMDB0000292	C00385	ko01100//Metabolic pathways;ko01110//Biosynthesis of secondary metabolites;ko01120//Microbial metabolism in diverse environments;ko00230//Purine metabolism;ko00232//Caffeine metabolism	Biosynthesis of other secondary metabolites;Global and overview maps;Nucleotide metabolism	Metabolism
Com_15108_pos	Strychnine sulfate	--	C21 H22 N2 O2	5.515	335.17	730575	1.14265e+06	577071	681663	791342	687380	818656	477923	631722	671147	580054	794522	772823	839185	976662	--	--	--	-	-	-	-
Com_8825_pos	--	Cinobufagin	C26 H34 O6	7.087	465.224	3.98049e+06	4.01558e+06	3.39729e+06	4.29881e+06	2.81931e+06	2.32228e+06	4.55558e+06	4.77142e+06	5.19581e+06	3.22381e+06	3.80479e+06	4.33451e+06	3.85018e+06	5.56517e+06	3.55533e+06	--	--	--	-	-	-	-
Com_6510_pos	N-[methyl(oxo)phenyl-lambda~6~-sulfanylidene]-N'-phenylurea	--	C14 H14 N2 O2 S	5.23	275.076	8.8727e+06	8.91085e+06	4.25681e+06	4.45989e+06	3.6283e+06	3.22399e+06	3.07958e+06	3.70582e+06	4.53306e+06	4.68557e+06	7.43122e+06	5.93795e+06	5.74144e+06	5.25865e+06	5.27545e+06	--	--	--	-	-	-	-
Com_160_pos	SM (d14:2/12:1)	--	C31 H59 N2 O6 P	7.514	587.43	4.76232e+08	4.6206e+08	7.6762e+08	6.53185e+08	2.87351e+08	2.68459e+08	4.36337e+08	4.2673e+08	4.6729e+08	4.73671e+08	3.68552e+08	3.75498e+08	4.80723e+08	4.31967e+08	4.73705e+08	--	--	--	-	-	-	-
Com_1639_pos	PE (6:0/16:3)	--	C27 H48 N O8 P	8.46	546.318	4.67443e+07	3.4812e+07	5.61387e+07	5.28772e+07	3.80243e+07	3.91796e+07	6.44685e+07	6.58872e+07	6.93082e+07	6.81337e+07	5.80044e+07	5.85517e+07	5.69291e+07	4.16833e+07	5.44405e+07	--	--	--	-	-	-	-
Com_3307_pos	PE (18:5e/22:0)	--	C45 H82 N O7 P	10.297	780.588	893319	903751	1.51766e+06	2.14504e+07	1.85257e+06	2.07643e+06	1.77791e+06	2.0135e+06	1.48993e+06	1.43107e+06	1.43808e+06	1.64208e+06	1.76475e+06	1.68476e+06	1.58218e+06	--	--	--	-	-	-	-
Com_2613_pos	LDGTS 6:0	--	C16 H31 N O6	5.063	334.222	3.15479e+07	2.82481e+07	2.74226e+07	2.65759e+07	3.06358e+07	3.40959e+07	2.77588e+07	2.75409e+07	3.76716e+07	3.83386e+07	2.95432e+07	2.89434e+07	3.02527e+07	2.86762e+07	3.2684e+07	--	--	--	-	-	-	-
Com_14237_pos	3-Aminotyrosine	--	C9 H12 N2 O3	5.604	197.096	867915	790766	877188	724096	1.54872e+06	737198	935917	896246	1.25073e+06	1.41562e+06	861683	1.35012e+06	1.26789e+06	1.65407e+06	1.17402e+06	--	--	--	-	-	-	-
Com_2157_pos	HKK	--	C18 H33 N7 O4	5.634	412.269	4.04428e+07	4.09581e+07	3.87272e+07	3.84873e+07	2.26314e+07	2.08342e+07	1.89387e+07	1.999e+07	1.18634e+07	1.4878e+07	2.34137e+07	2.19097e+07	2.95354e+07	2.71262e+07	2.34823e+07	--	--	--	-	-	-	-
Com_16733_pos	--	Flavokawain B	C17 H16 O4	5.994	285.112	231006	300936	223074	207209	333931	245501	252349	182678	216345	257012	212037	208348	227704	257835	264412	Linear 1,3-diarylpropanoids	1775-97-9	HMDB0033691	-	-	-	-
Com_12426_pos	3-Hydroxy-3-methylbutanoic acid	--	C5 H10 O3	5.476	102.046	1.16568e+06	1.13527e+06	746303	714654	2.41495e+06	2.49139e+06	1.24981e+06	1.60995e+06	993007	814092	958760	1.31042e+06	1.12277e+06	1.20769e+06	1.43329e+06	Fatty Acyls	625-08-1	HMDB0000754	-	-	-	-
Com_2515_pos	--	N-[(-)-Jasmonoyl]-(L)-Isoleucine	C18 H29 N O4	5.43	324.216	3.52842e+07	3.47446e+07	4.79972e+06	4.12255e+06	1.1119e+07	1.24899e+07	7.32719e+06	6.57335e+06	1.83634e+06	7.21332e+06	8.54482e+06	8.90576e+06	1.24707e+07	1.22942e+07	1.23607e+07	--	--	--	-	-	-	-
Com_4314_pos	SM (d17:2/15:0)	--	C37 H73 N2 O6 P	7.519	691.529	6.25153e+06	5.8468e+06	1.5317e+07	1.5115e+07	3.28443e+06	3.37234e+06	8.0522e+06	6.28269e+06	1.02638e+07	6.45819e+06	3.54188e+06	6.19351e+06	7.84511e+06	5.6472e+06	7.68366e+06	--	--	--	-	-	-	-
Com_6638_pos	FNH	--	C19 H24 N6 O5	5.19	400.166	7.8196e+06	8.57758e+06	4.43929e+06	4.69698e+06	1.6824e+06	2.2317e+06	3.21388e+06	3.50665e+06	1.60805e+06	7.26784e+06	2.96455e+06	2.60233e+06	4.99291e+06	3.87867e+06	4.10194e+06	--	--	--	-	-	-	-
Com_547_pos	N1,N1-dicyclohexyl-3-(1-naphthyl)acrylamide	--	C25 H31 N O	5.074	362.253	2.0824e+08	1.86049e+08	1.72781e+08	1.6151e+08	1.87281e+08	1.72791e+08	1.73634e+08	1.51405e+08	1.90329e+08	1.97268e+08	1.63813e+08	1.64659e+08	1.63663e+08	1.78915e+08	1.92602e+08	--	--	--	-	-	-	-
Com_1348_pos	2-(acetylamino)-3-[4-(acetylamino)phenyl]acrylic acid	--	C13 H14 N2 O4	5.32	263.102	4.47219e+07	3.89214e+07	3.45876e+07	3.42264e+07	8.00237e+07	6.87865e+07	6.70682e+07	5.71671e+07	7.40829e+07	7.25334e+07	7.65555e+07	7.99475e+07	5.68225e+07	5.74958e+07	5.94998e+07	--	--	--	-	-	-	-
Com_33_pos	5汐-Dihydrotestosterone	--	C19 H30 O2	8.256	291.231	3.21655e+09	3.22613e+09	4.00084e+09	3.75457e+09	2.12298e+09	2.2175e+09	3.59065e+09	3.53519e+09	3.57677e+09	3.62017e+09	3.00855e+09	3.03411e+09	3.26362e+09	3.39129e+09	3.35229e+09	--	--	--	-	-	-	-
Com_10622_pos	PC (18:1e/17:0)	--	C43 H86 N O7 P	9.912	760.608	1.59558e+06	1.27291e+06	2.18731e+06	2.33337e+06	3.67351e+06	3.14622e+06	1.94143e+06	2.06289e+06	1.14729e+06	1.37857e+06	1.50179e+06	1.42112e+06	2.34428e+06	1.86536e+06	2.51798e+06	--	--	--	-	-	-	-
Com_5672_pos	4-acetyl-4-(ethoxycarbonyl)heptanedioic acid	--	C12 H18 O7	4.867	275.11	7.07911e+06	5.3759e+06	5.57427e+06	4.82046e+06	1.05237e+07	1.11682e+07	9.46921e+06	1.15011e+07	8.73245e+06	7.73559e+06	1.36103e+07	1.29595e+07	8.14549e+06	9.281e+06	8.96501e+06	--	--	--	-	-	-	-
Com_4684_pos	--	3-Hydroxy-glabrol	C25 H28 O5	9.41	409.202	5.88475e+06	7.42853e+06	8.64357e+06	1.32844e+07	5.31305e+06	4.816e+06	1.32382e+07	1.35032e+07	1.12706e+07	1.14828e+07	1.06572e+07	1.31044e+07	1.14464e+07	1.197e+07	9.70007e+06	--	--	--	-	-	-	-
Com_2988_pos	--	D-Panthotenate	C9 H17 N O5	1.917	220.118	2.94501e+07	1.80309e+07	9.64258e+06	8.47238e+06	1.40967e+07	1.46772e+07	1.10876e+07	1.02745e+07	1.11341e+07	1.20236e+07	1.65228e+07	1.44193e+07	1.29152e+07	1.32874e+07	1.36263e+07	--	--	--	-	-	-	-
Com_10635_pos	--	Asperulosid	C18 H22 O11	5.216	397.111	2.24753e+06	2.34276e+06	1.29094e+06	1.13427e+06	2.78899e+06	2.7336e+06	1.5247e+06	1.70221e+06	1.71091e+06	1.46413e+06	1.49385e+06	4.12637e+06	3.09207e+06	2.21897e+06	2.32581e+06	--	--	--	-	-	-	-
Com_4858_pos	Dihydrolycorine	--	C16 H19 N O4	2.139	290.134	5.01969e+06	4.32137e+06	2.8168e+06	2.46944e+06	1.47916e+07	9.00346e+06	6.43997e+06	6.27353e+06	2.65803e+06	2.31916e+06	2.66474e+06	2.72981e+06	4.56178e+06	4.51977e+06	4.71364e+06	--	--	--	-	-	-	-
Com_7447_pos	--	Acetyl-trans-resveratrol	C20 H18 O6	6.714	355.118	967682	951629	949372	898973	5.66407e+06	7.35062e+06	5.34709e+06	4.89299e+06	1.01343e+06	1.00166e+06	1.06348e+06	969989	2.16842e+06	1.56574e+06	1.24387e+06	--	--	--	-	-	-	-
Com_4878_pos	Medroxyprogesterone	--	C22 H32 O3	7.847	345.242	8.42932e+06	9.82188e+06	1.31203e+07	1.04084e+07	1.4253e+07	1.21126e+07	1.6006e+07	1.34848e+07	1.49609e+07	1.5582e+07	1.0134e+07	9.43321e+06	1.09564e+07	1.19551e+07	1.24514e+07	Steroids and steroid derivatives	520-85-4	HMDB0001939	-	-	-	-
Com_14903_pos	--	ladanein	C17 H14 O6	5.287	315.086	377953	381070	377368	368315	1.03436e+06	804850	978253	632549	746408	359177	586673	1.45874e+06	552992	358272	590505	--	--	--	-	-	-	-
Com_808_pos	LNH	--	C16 H26 N6 O5	5.728	383.203	1.25577e+08	1.20471e+08	8.89444e+07	1.21134e+08	1.34354e+08	1.08202e+08	8.28158e+07	1.08735e+08	1.18032e+08	1.4894e+08	1.13361e+08	1.44692e+08	5.8527e+07	1.28592e+08	1.11131e+08	--	--	--	-	-	-	-
Com_11047_pos	Mupirocin	--	C26 H44 O9	7.993	523.286	356844	294672	359426	490465	839056	581893	3.75362e+06	3.39354e+06	1.91938e+06	1.95088e+06	1.73736e+06	1.40441e+06	1.27162e+06	898156	1.26636e+06	Fatty Acyls	12650-69-0	HMDB0014554	-	-	-	-
Com_4385_pos	1-(7-methoxy-2-oxo-2H-chromen-8-yl)-3-methyl-2-oxobutyl acetate	--	C17 H18 O6	5.521	341.101	9.10033e+06	8.81413e+06	1.47578e+07	1.47727e+07	1.0102e+07	3.67887e+06	1.04372e+07	9.69614e+06	1.45585e+07	1.38316e+07	9.1671e+06	1.01416e+07	1.08222e+07	1.06117e+07	1.00229e+07	--	--	--	-	-	-	-
Com_9989_pos	FNK	--	C19 H29 N5 O5	4.776	408.222	3.47831e+06	2.66897e+06	3.16926e+06	3.55505e+06	3.40733e+06	3.10219e+06	3.93524e+06	3.42485e+06	3.58204e+06	3.60595e+06	3.49641e+06	3.10959e+06	3.58573e+06	2.75161e+06	3.83163e+06	--	--	--	-	-	-	-
Com_1210_pos	Cuminaldehyde	--	C10 H12 O	5.356	149.096	5.0964e+07	5.17585e+07	5.94991e+07	6.35232e+07	9.15337e+07	8.61594e+07	7.26624e+07	6.43513e+07	7.69865e+07	8.04938e+07	9.2224e+07	1.0201e+08	7.69865e+07	7.6053e+07	7.47161e+07	Prenol lipids	122-03-2	HMDB0002214	C06577	ko01120//Microbial metabolism in diverse environments;ko01220//Degradation of aromatic compounds	Global and overview maps	Metabolism
Com_1794_pos	--	N-Acetylglucosamine	C8 H15 N O6	1.362	222.097	3.15785e+07	3.02179e+07	2.92334e+07	2.34631e+07	3.62786e+07	4.90887e+07	5.51203e+07	4.98862e+07	3.88287e+07	2.46014e+07	6.66801e+07	6.08678e+07	2.66115e+07	3.0889e+07	4.88594e+07	Organooxygen compounds	14131-68-1	HMDB0000803	C00140	ko01100//Metabolic pathways;ko02010//ABC transporters;ko00520//Amino sugar and nucleotide sugar metabolism	Carbohydrate metabolism;Global and overview maps;Membrane transport	Environmental Information Processing;Metabolism
Com_13270_pos	--	5-Methylcytidine	C10 H15 N3 O5	5.514	258.11	508307	586227	363604	610787	2.02844e+06	1.3409e+06	466408	517717	864760	756926	314218	531082	773822	963599	720643	Pyrimidine nucleosides	2140-61-6	HMDB0000982	-	-	-	-
Com_5221_pos	N1-(1,3-thiazol-2-yl)-2-(1-adamantyl)acetamide	--	C15 H20 N2 O S	7.373	255.159	9.44601e+06	7.69355e+06	1.01858e+07	1.13299e+07	1.01384e+07	1.22758e+07	1.05292e+07	1.18495e+07	1.07292e+07	1.06499e+07	1.30173e+07	1.29459e+07	1.1439e+07	9.28734e+06	1.06465e+07	--	--	--	-	-	-	-
Com_296_pos	VLH	--	C17 H29 N5 O4	5.623	373.184	3.97747e+08	3.12098e+08	1.69277e+08	1.92838e+08	1.08098e+08	1.02168e+08	8.9712e+07	1.02551e+08	1.23434e+08	1.61605e+08	1.02803e+08	1.23029e+08	1.81589e+08	1.73722e+08	1.92442e+08	--	--	--	-	-	-	-
Com_378_pos	SM (d14:3/12:1)	--	C31 H57 N2 O6 P	6.717	585.414	2.20013e+08	2.32844e+08	2.62882e+08	2.63501e+08	2.1168e+08	2.00034e+08	1.29131e+08	1.04435e+08	2.04836e+08	2.09787e+08	1.68405e+08	1.60894e+08	2.10704e+08	1.96407e+08	2.05796e+08	--	--	--	-	-	-	-
Com_2026_pos	Hastatoside	--	C17 H24 O11	5.058	383.154	3.37358e+07	2.90113e+07	1.60189e+07	1.63645e+07	3.34859e+07	2.91275e+07	4.21701e+07	4.43168e+07	2.13393e+07	4.78815e+07	4.72784e+07	4.37218e+07	4.91938e+07	4.09061e+07	4.44941e+07	--	--	--	-	-	-	-
Com_1508_pos	Ampiroxicam	--	C20 H21 N3 O7 S	5.494	448.118	2.54788e+06	2.7947e+06	3.00551e+06	3.08561e+06	1.57733e+07	1.58414e+07	9.58884e+06	7.94551e+06	5.21538e+06	5.67599e+06	7.60871e+07	7.95679e+07	2.12579e+07	2.30935e+07	2.34909e+07	--	--	--	-	-	-	-
Com_3263_pos	--	Valepotriate	C22 H30 O8	5.622	423.201	1.20786e+07	9.67085e+06	1.34568e+07	1.39539e+07	2.58305e+07	1.58126e+07	1.7973e+07	1.27863e+07	1.52552e+07	1.27716e+07	2.6662e+07	2.72518e+07	2.06636e+07	2.46099e+07	2.37002e+07	Prenol lipids	18296-44-1	HMDB0034493	-	-	-	-
Com_3157_pos	--	Coumalic acid	C6 H4 O4	1.983	141.018	2.31222e+07	2.16004e+07	2.41708e+07	2.08636e+07	2.37091e+07	1.8823e+07	2.6496e+07	2.2642e+07	2.26309e+07	2.52287e+07	2.00903e+07	2.78166e+07	2.2967e+07	1.40214e+07	1.97529e+07	--	--	--	-	-	-	-
Com_4567_pos	N2,N2-Dimethylguanosine	--	C12 H17 N5 O5	4.887	312.129	8.46267e+06	7.44691e+06	8.94276e+06	8.59612e+06	1.01047e+07	1.05301e+07	8.56726e+06	9.57626e+06	1.005e+07	8.45134e+06	1.87772e+07	1.73198e+07	1.05239e+07	1.0051e+07	1.1006e+07	Purine nucleosides	2140-67-2	HMDB0004824	-	-	-	-
Com_14232_pos	Rizatriptan	--	C15 H19 N5	4.748	270.169	777956	709362	763330	548074	540622	490466	1.79289e+06	338193	510253	810600	377277	489627	678620	542484	682819	Indoles and derivatives	145202-66-0	HMDB0015088	-	-	-	-
Com_10354_pos	--	Tigloylgomisin H	C28 H36 O8	5.09	523.228	2.81485e+06	920391	1.55977e+06	1.33997e+06	3.90301e+06	1.54274e+06	1.57524e+06	1.73331e+06	1.49508e+06	2.46303e+06	418288	1.63492e+06	1.63662e+06	2.05726e+06	2.77206e+06	--	--	--	-	-	-	-
Com_2528_pos	Linoleoyl ethanolamide	--	C20 H37 N O2	9.254	324.289	3.62851e+07	3.46393e+07	3.14308e+07	2.96946e+07	2.72855e+07	2.61388e+07	3.21263e+07	3.0346e+07	2.00943e+07	1.9902e+07	2.52462e+07	2.52372e+07	2.76414e+07	3.00806e+07	3.02558e+07	Organonitrogen compounds	-	HMDB0013624	-	-	-	-
Com_13478_pos	Quercetin-3-O-汕-D-glucose-7-O-汕-D-gentiobioside	--	C33 H40 O22	4.869	789.209	317557	249210	249696	220408	409413	373673	250900	231877	314403	321486	2.08743e+06	2.17999e+06	314795	335716	526722	--	--	--	-	-	-	-
Com_9408_pos	PC (14:0e/3:0)	--	C25 H52 N O7 P	9.788	510.355	883768	1.21831e+06	816477	489973	4.17067e+06	4.73728e+06	2.41936e+06	3.02756e+06	925065	1.10899e+06	2.92693e+06	2.92421e+06	1.81692e+06	2.01455e+06	1.94254e+06	--	--	--	-	-	-	-
Com_5241_pos	5-Methyl-2-thiouridine	--	C10 H14 N2 O5 S	1.223	275.067	1.08212e+07	1.06576e+07	9.18092e+06	9.94269e+06	1.08559e+07	1.01824e+07	1.19661e+07	1.42176e+07	1.37608e+07	1.3712e+07	1.01078e+07	1.13275e+07	1.31738e+07	1.2354e+07	1.20907e+07	--	--	--	-	-	-	-
Com_12685_pos	--	Polygalaxanthone ｌ	C27 H32 O15	5.197	597.181	288290	265799	227085	223545	2.01057e+06	2.34404e+06	1.13673e+06	1.08493e+06	245657	268816	780447	1.01265e+06	847019	465297	583596	--	--	--	-	-	-	-
Com_2192_pos	13-OxoODE	--	C18 H30 O3	7.338	317.208	3.44683e+07	3.19605e+07	2.92799e+07	3.40311e+07	3.77154e+07	4.25359e+07	4.87928e+07	4.31441e+07	3.42382e+07	1.70807e+07	3.94193e+07	1.46237e+07	4.42989e+07	3.47199e+07	3.90542e+07	Fatty Acyls	-	HMDB0004668	C14765	ko00591//Linoleic acid metabolism	Lipid metabolism	Metabolism
Com_7839_pos	--	Kynurenic acid O-hexside	C16 H17 N O8	5.367	352.102	6.82389e+06	5.16466e+06	3.18202e+06	3.20284e+06	5.20479e+06	5.03401e+06	4.28529e+06	4.45725e+06	4.16634e+06	3.99831e+06	7.45596e+06	5.5705e+06	5.33212e+06	4.87827e+06	5.65735e+06	--	--	--	-	-	-	-
Com_10557_pos	N2-Methylguanosine	--	C11 H15 N5 O5	5.176	298.113	3.61356e+06	3.25053e+06	1.56755e+06	1.65577e+06	2.18125e+06	2.03166e+06	1.40566e+06	1.5958e+06	2.33492e+06	2.05058e+06	4.31309e+06	3.67974e+06	2.70565e+06	2.34586e+06	2.51188e+06	--	--	--	-	-	-	-
Com_11295_pos	(㊣)11(12)-DiHET	--	C20 H34 O4	5.732	362.18	1.99023e+06	2.05465e+06	1.28978e+06	1.29606e+06	2.25021e+06	1.71779e+06	1.89407e+06	1.15836e+06	3.24805e+06	3.4798e+06	1.21931e+06	724926	1.25667e+06	2.35285e+06	1.88957e+06	--	--	--	-	-	-	-
Com_10969_pos	Polygalic acid	--	C29 H44 O6	9.176	489.32	1.74629e+06	1.79067e+06	2.28206e+06	2.87325e+06	872309	756897	1.38361e+06	2.75872e+06	2.03698e+06	2.34766e+06	1.40054e+06	1.26915e+06	1.67014e+06	1.434e+06	2.21893e+06	--	--	--	-	-	-	-
Com_9165_pos	PC (14:0e/4:0)	--	C26 H54 N O7 P	9.994	524.37	2.60356e+06	2.42173e+06	4.46143e+06	4.00759e+06	2.79293e+06	2.79506e+06	1.5053e+06	1.36221e+06	2.68893e+06	2.22269e+06	1.66747e+06	1.86701e+06	2.64602e+06	2.91834e+06	2.70169e+06	--	--	--	-	-	-	-
Com_15335_pos	ACar 13:0	--	C20 H40 N O4	8.14	358.294	825505	699488	622337	602722	317000	240952	656933	554898	1.23335e+06	925632	525812	537104	571693	582965	622902	--	--	--	-	-	-	-
Com_12828_pos	--	Smyrindioloside	C20 H24 O10	4.903	407.132	997553	624957	497913	484703	2.26168e+06	458948	659941	423058	818779	736220	844021	487854	766722	1.02732e+06	812693	Coumarins and derivatives	87592-77-6	HMDB0039037	-	-	-	-
Com_2056_pos	PC (2:0/16:2)	--	C26 H48 N O8 P	6.737	534.32	1.42035e+07	1.50799e+07	1.60894e+07	1.39742e+07	1.57727e+07	1.30608e+07	3.35494e+07	3.6943e+07	5.41367e+07	5.20096e+07	4.92897e+07	5.07391e+07	2.53334e+07	2.34549e+07	3.69615e+07	--	--	--	-	-	-	-
Com_6781_pos	Nialamide	--	C16 H18 N4 O2	6.011	299.146	4.2962e+06	3.97038e+06	3.93881e+06	2.5985e+06	4.05699e+06	4.52949e+06	7.14204e+06	8.24013e+06	6.65189e+06	6.84338e+06	1.00612e+07	8.78573e+06	5.02416e+06	5.28031e+06	4.68983e+06	--	--	--	-	-	-	-
Com_6242_pos	Picrotin	--	C15 H18 O7	5.386	311.112	8.66848e+06	6.04804e+06	4.71776e+06	5.03732e+06	7.40454e+06	4.85205e+06	2.54692e+06	4.04184e+06	6.52891e+06	6.38416e+06	1.14195e+07	1.12526e+07	5.90392e+06	8.59035e+06	4.31746e+06	Furopyrans	-	HMDB0240279	-	-	-	-
Com_9906_pos	Diphenoxylate	--	C30 H32 N2 O2	7.392	453.262	1.30188e+06	2.2013e+06	1.63828e+06	1.47431e+06	1.34653e+06	1.94895e+06	4.80875e+06	3.28978e+06	2.40048e+06	1.83538e+06	1.47789e+06	1.52906e+06	2.47641e+06	1.98926e+06	1.72957e+06	Benzene and substituted derivatives	915-30-0	HMDB0015213	-	-	-	-
Com_6387_pos	13,14-dihydro-15-keto-tetranor Prostaglandin E2	--	C16 H26 O5	7.409	321.167	2.07646e+06	2.3472e+06	4.04545e+06	5.09798e+06	2.09066e+06	1.67906e+06	1.05882e+07	1.03082e+07	4.20297e+06	4.24428e+06	6.69225e+06	5.64582e+06	4.39355e+06	5.19863e+06	4.78532e+06	--	--	--	-	-	-	-
Com_3977_pos	Angiotensin IV	--	C40 H54 N8 O8	8.156	775.423	1.72598e+06	1.14325e+06	2.36321e+06	1.68531e+06	1.00955e+06	1.46899e+06	2.22841e+07	2.02409e+07	7.16955e+06	7.87053e+06	5.16988e+06	5.39714e+06	4.84364e+06	5.30112e+06	4.13443e+06	Carboxylic acids and derivatives	12676-15-2	HMDB0001038	-	-	-	-
Com_16506_pos	--	4,5-DCQA Isochlorogenic acid C	C25 H24 O12	5.629	517.133	343525	263564	212415	460003	190723	186364	246416	275280	233216	245450	201170	223991	271077	258481	260362	--	--	--	-	-	-	-
Com_9079_pos	Triptonide	--	C20 H22 O6	4.871	359.148	4.59575e+06	2.8212e+06	2.61788e+06	2.9791e+06	1.57094e+06	2.78123e+06	3.01007e+06	2.77668e+06	5.70094e+06	4.14567e+06	3.04762e+06	4.78424e+06	3.24865e+06	3.32829e+06	1.58334e+06	--	--	--	-	-	-	-
Com_3046_pos	3-Furfuryl 2-pyrrolecarboxylate	--	C10 H9 N O3	5.475	192.065	4.98304e+06	4.80335e+06	2.32271e+06	2.1741e+06	2.69307e+07	2.83461e+07	1.10347e+07	1.00487e+07	3.42563e+06	3.07375e+06	2.49766e+06	2.41424e+06	8.7579e+06	9.61591e+06	8.92102e+06	--	--	--	-	-	-	-
Com_1778_pos	AL 8810 Methyl ester	--	C25 H33 F O4	5.895	439.23	4.38116e+07	4.42539e+07	4.55046e+07	4.07996e+07	3.41689e+07	3.51505e+07	4.39249e+07	6.22248e+07	5.74381e+07	5.13408e+07	4.9018e+07	5.45816e+07	4.91998e+07	4.62898e+07	4.55001e+07	--	--	--	-	-	-	-
Com_9399_pos	Pachymic acid	--	C33 H52 O5	9.253	529.388	4.63481e+06	3.87546e+06	4.25543e+06	3.60332e+06	3.04446e+06	3.1403e+06	3.42355e+06	2.75451e+06	3.47218e+06	2.80047e+06	2.33249e+06	1.9628e+06	3.20915e+06	3.237e+06	2.56471e+06	--	--	--	-	-	-	-
Com_3692_pos	Flavin mononucleotide	--	C17 H21 N4 O9 P	5.667	457.112	2.08293e+07	2.08103e+07	1.66854e+07	1.61346e+07	9.60478e+06	9.50486e+06	1.28059e+07	1.13481e+07	1.67016e+07	1.62421e+07	1.40011e+07	1.37586e+07	1.65437e+07	1.57101e+07	1.54832e+07	Flavin nucleotides	146-17-8	HMDB0001520	C00061	ko01100//Metabolic pathways;ko01110//Biosynthesis of secondary metabolites;ko00190//Oxidative phosphorylation;ko00740//Riboflavin metabolism	Energy metabolism;Global and overview maps;Metabolism of cofactors and vitamins	Metabolism
Com_6420_pos	Methoxamine	--	C11 H17 N O3	2.171	212.129	4.65169e+06	4.25887e+06	3.42323e+06	2.91976e+06	3.71365e+06	3.61048e+06	6.15053e+06	5.82041e+06	1.07015e+07	1.01999e+07	3.14092e+06	3.50847e+06	5.04977e+06	5.38217e+06	5.54567e+06	Benzene and substituted derivatives	390-28-3	HMDB0014861	-	-	-	-
Com_4467_pos	--	N-Lauryldiethanolamine	C16 H35 N O2	6.559	274.274	4.94977e+06	5.11657e+06	3.28844e+06	3.24437e+06	2.84743e+06	2.69018e+06	7.5531e+06	7.80955e+06	1.88579e+07	1.85171e+07	4.28658e+06	4.26774e+06	7.51038e+06	6.99193e+06	6.83919e+06	--	--	--	-	-	-	-
Com_8220_pos	Iristectorigenin B	--	C17 H14 O7	4.682	331.078	2.93298e+06	3.58123e+06	2.72345e+06	2.97477e+06	3.53768e+06	6.15156e+06	3.66172e+06	3.79237e+06	3.10105e+06	3.56196e+06	5.66538e+06	4.83148e+06	4.22222e+06	4.37288e+06	6.09564e+06	--	--	--	-	-	-	-
Com_11726_pos	--	Gly-Tyr-Ala	C14 H19 N3 O5	4.979	310.139	2.94115e+06	2.75473e+06	1.55894e+06	1.55681e+06	1.94158e+06	1.52541e+06	1.9908e+06	1.82652e+06	2.24716e+06	2.55694e+06	2.21209e+06	2.34185e+06	1.85686e+06	1.51387e+06	2.07818e+06	--	--	--	-	-	-	-
Com_1528_pos	5-methoxy-8,8-dimethyl-2-phenyl-4H,8H-pyrano[2,3-h]chromen-4-one	--	C21 H18 O4	4.688	313.149	5.16236e+07	4.12927e+07	2.41599e+07	2.20655e+07	6.43535e+07	6.33564e+07	3.98093e+07	3.61101e+07	5.43293e+07	4.3994e+07	8.00293e+07	6.23889e+07	5.18066e+07	5.36976e+07	4.63357e+07	--	--	--	-	-	-	-
Com_6113_pos	PE (18:0e/18:2)	--	C41 H80 N O7 P	10.511	730.574	394009	398610	669385	8.75892e+06	817100	915834	837740	888081	657150	631193	634283	724258	778365	743084	697838	--	--	--	-	-	-	-
Com_7586_pos	5-[(10Z)-14-(3,5-dihydroxyphenyl)tetradec-10-en-1-yl]benzene-1,3-diol	--	C26 H36 O4	7.629	413.266	4.67904e+06	4.7327e+06	3.93725e+06	2.71802e+06	5.34129e+06	5.82557e+06	7.70371e+06	5.46238e+06	4.65388e+06	5.7675e+06	8.23105e+06	7.49654e+06	5.03859e+06	5.10094e+06	4.57868e+06	--	--	--	-	-	-	-
Com_7249_pos	Arglabin	--	C15 H18 O3	8.442	247.13	4.97255e+06	5.02648e+06	6.8868e+06	4.45491e+06	837895	4.44458e+06	3.20512e+06	2.8881e+06	4.17559e+06	2.85946e+06	6.91753e+06	6.2003e+06	3.20416e+06	4.43218e+06	5.08479e+06	--	--	--	-	-	-	-
Com_1666_pos	Isopimpinellin	--	C13 H10 O5	1.491	247.057	5.59369e+07	4.81695e+07	5.52801e+07	5.01446e+07	2.29146e+07	2.26971e+07	2.44173e+07	2.97954e+07	3.12849e+07	3.29211e+07	5.44537e+07	4.16618e+07	3.15199e+07	3.10241e+07	4.0485e+07	Coumarins and derivatives	482-27-9	HMDB0034312	C02162	ko01110//Biosynthesis of secondary metabolites	Global and overview maps	Metabolism
Com_803_pos	Senkyunolide A	--	C12 H16 O2	5.967	193.122	5.99491e+07	4.85222e+07	1.08681e+08	3.82075e+07	4.18555e+07	6.65839e+07	6.03141e+07	5.60472e+07	7.77651e+07	6.48205e+07	1.67206e+08	1.60474e+08	5.55157e+07	4.82041e+07	4.99779e+07	--	--	--	-	-	-	-
Com_226_pos	4-oxododecanedioic acid	--	C12 H20 O5	5.758	227.125	4.91379e+08	4.53867e+08	5.11441e+08	4.62158e+08	2.91006e+08	2.71797e+08	5.36184e+08	4.98305e+08	5.62859e+08	5.54998e+08	4.14434e+08	4.24801e+08	4.51707e+08	4.59961e+08	4.91447e+08	--	--	--	-	-	-	-
Com_7684_pos	4-oxo-5-phenylpentanoic acid	--	C11 H12 O3	5.884	193.083	6.87463e+06	6.55164e+06	6.22223e+06	5.57963e+06	6.0213e+06	5.89088e+06	4.09084e+06	4.86479e+06	5.36902e+06	6.7527e+06	4.686e+06	4.77204e+06	5.25839e+06	5.28256e+06	5.33938e+06	--	--	--	-	-	-	-
Com_8124_pos	--	Petunidin-3-O-glucoside chloride	C22 H23 Cl O12	5.958	515.094	5.25806e+06	4.91131e+06	5.48231e+06	5.33908e+06	2.78827e+06	3.01049e+06	4.07697e+06	3.15085e+06	5.31366e+06	6.54785e+06	2.80878e+06	3.01591e+06	4.03618e+06	4.61282e+06	4.51485e+06	--	--	--	-	-	-	-
Com_9160_pos	LPC 14:0	--	C22 H46 N O7 P	8.219	468.309	2.72601e+06	2.57841e+06	4.09764e+06	2.94131e+06	2.78151e+06	4.13197e+06	5.26245e+06	3.75415e+06	5.59692e+06	4.92052e+06	2.46559e+06	2.88909e+06	3.27129e+06	2.89779e+06	2.88127e+06	--	--	--	-	-	-	-
Com_3811_pos	--	Isobavachalcone	C20 H20 O4	6.864	325.143	5.10938e+06	3.7016e+06	1.46773e+06	1.35736e+06	1.79614e+07	1.68915e+07	2.35535e+07	2.12165e+07	1.40454e+06	1.28524e+06	1.65469e+06	1.3022e+06	7.18865e+06	7.00826e+06	5.2193e+06	--	--	--	-	-	-	-
Com_1120_pos	DGTS (2:0/10:0)	--	C22 H41 N O7	5.617	432.295	9.90852e+07	9.60428e+07	6.29632e+07	5.7797e+07	4.05641e+07	4.86059e+07	3.17222e+07	3.70346e+07	2.12075e+07	2.19593e+07	3.80951e+07	3.39435e+07	6.59747e+07	7.14245e+07	8.64976e+07	--	--	--	-	-	-	-
Com_9229_pos	--	Palmitoylethanolamide	C18 H37 N O2	9.595	300.289	4.57768e+06	4.28967e+06	2.84311e+06	2.73527e+06	4.31227e+06	4.91612e+06	3.81261e+06	2.76239e+06	2.46872e+06	2.78855e+06	2.75683e+06	2.79943e+06	4.12645e+06	4.24503e+06	4.00513e+06	Carboximidic acids and derivatives	544-31-0	HMDB0002100	-	-	-	-
Com_4734_pos	RKK	--	C18 H38 N8 O4	5.159	216.159	8.01546e+06	7.13586e+06	6.42501e+06	6.69829e+06	1.13068e+07	1.53891e+07	6.69897e+06	6.15754e+06	5.43646e+06	5.15088e+06	7.19809e+06	7.19289e+06	7.44981e+06	7.91759e+06	7.76426e+06	--	--	--	-	-	-	-
Com_5484_pos	Chlorogenic acid	--	C16 H18 O9	4.789	355.101	858810	711659	796819	975175	1.31879e+06	1.65322e+06	940971	1.08633e+06	909560	1.36168e+07	1.63721e+06	2.07762e+06	1.24377e+06	1.27519e+06	1.07377e+06	Organooxygen compounds	327-97-9	HMDB0003164	C00852	ko01110//Biosynthesis of secondary metabolites;ko00940//Phenylpropanoid biosynthesis;ko00941//Flavonoid biosynthesis;ko00945//Stilbenoid, diarylheptanoid and gingerol biosynthesis	Biosynthesis of other secondary metabolites;Global and overview maps	Metabolism
Com_4187_pos	Tyr-Tyr-Tyr	--	C27 H29 N3 O7	4.828	508.201	1.87755e+07	1.6695e+07	8.93659e+06	8.96352e+06	1.50873e+07	1.68248e+07	9.45853e+06	8.94229e+06	1.31526e+07	1.28719e+07	1.99013e+07	1.90884e+07	1.43691e+07	1.46565e+07	1.57237e+07	--	--	--	-	-	-	-
Com_7816_pos	--	Curdione	C15 H24 O2	9.588	237.185	5.65616e+06	5.09366e+06	5.67271e+06	4.5249e+06	6.76077e+06	6.25006e+06	3.29038e+06	4.05607e+06	4.26937e+06	4.6391e+06	3.52509e+06	2.90136e+06	3.63418e+06	4.95832e+06	6.99032e+06	Prenol lipids	13657-68-6	HMDB0034714	-	-	-	-
Com_6207_pos	--	Artemether	C16 H26 O5	5.976	299.184	8.59146e+06	6.91969e+06	8.18057e+06	8.52958e+06	6.07109e+06	5.52294e+06	7.72892e+06	6.53752e+06	7.12841e+06	6.92692e+06	6.97894e+06	8.35374e+06	7.47237e+06	7.68903e+06	7.23769e+06	Prenol lipids	71963-77-4	HMDB0015643	-	-	-	-
Com_15221_pos	S-(-)-Carbidopa	--	C10 H14 N2 O4	1.401	227.102	1.168e+06	1.05229e+06	541407	877131	745655	891683	1.12704e+06	1.23368e+06	983750	1.00071e+06	1.01723e+06	1.13174e+06	787717	710328	796857	--	--	--	-	-	-	-
Com_3284_pos	15-OxoEDE	--	C20 H34 O3	8.632	323.257	1.66527e+07	1.5235e+07	1.85963e+07	2.16891e+07	7.79391e+06	7.92546e+06	2.0323e+07	2.03765e+07	1.77746e+07	1.79868e+07	1.93531e+07	1.68459e+07	1.81196e+07	1.69593e+07	1.66076e+07	--	--	--	-	-	-	-
Com_2387_pos	LDGTS 7:0	--	C17 H33 N O6	5.324	348.237	3.49697e+07	3.57132e+07	3.51004e+07	3.31798e+07	1.73019e+07	1.75368e+07	2.96228e+07	3.04495e+07	1.3852e+07	1.42993e+07	3.32679e+07	3.24781e+07	2.86238e+07	2.65622e+07	2.68747e+07	--	--	--	-	-	-	-
Com_1593_pos	2-{1-[2-(1-benzothiophen-5-ylamino)-2-oxoethyl]cyclohexyl}acetic acid	--	C18 H21 N O3 S	2.127	332.134	1.14168e+07	6.99235e+06	1.4738e+07	9.21243e+06	4.18459e+07	3.73865e+07	1.80319e+07	1.37183e+07	1.45545e+07	7.25798e+06	6.62629e+07	7.37829e+07	1.62022e+07	3.25973e+07	2.5239e+07	--	--	--	-	-	-	-
Com_12686_pos	--	Aloesin	C19 H22 O9	4.854	395.133	1.61414e+06	1.39843e+06	565872	564606	2.35244e+06	1.70501e+06	1.1595e+06	1.11183e+06	1.986e+06	1.63533e+06	1.7603e+06	1.61156e+06	1.2929e+06	931964	1.36222e+06	--	--	--	-	-	-	-
Com_683_pos	T-2 Triol	--	C20 H30 O7	5.669	366.175	1.35687e+08	1.62136e+08	1.01025e+08	1.30909e+08	8.13723e+07	6.33609e+07	9.32196e+07	7.57364e+07	1.25244e+08	9.23508e+07	7.16558e+07	6.03373e+07	9.24983e+07	8.80151e+07	9.22342e+07	Prenol lipids	34114-98-2	HMDB0035396	-	-	-	-
Com_171_pos	Octadecanedioic acid	--	C18 H34 O4	8.358	315.252	7.71831e+08	7.44147e+08	3.14042e+08	6.27521e+08	9.14568e+07	2.04959e+08	2.68339e+08	2.75851e+08	3.07614e+08	3.3539e+08	3.74468e+08	4.29228e+08	4.46721e+08	3.76871e+08	5.08636e+08	Fatty Acyls	871-70-5	HMDB0000782	-	-	-	-
Com_3203_pos	RNK	--	C16 H32 N8 O5	8.063	417.26	2.1762e+07	2.33568e+07	2.08823e+07	1.99264e+07	2.65268e+07	2.55882e+07	1.43618e+07	1.36896e+07	1.87676e+07	1.85708e+07	2.97789e+07	2.68906e+07	1.90786e+07	2.12057e+07	1.95259e+07	--	--	--	-	-	-	-
Com_9325_pos	1-(2,4-dihydroxyphenyl)-2-(3,5-dimethoxyphenyl)propan-1-one	--	C17 H18 O5	5.92	343.117	1.18463e+06	987606	967349	901650	4.41449e+06	4.83188e+06	3.49785e+06	3.11565e+06	988497	921768	1.27192e+06	1.33186e+06	1.93638e+06	1.52719e+06	2.27687e+06	--	--	--	-	-	-	-
Com_5897_pos	--	Fargesin	C21 H22 O6	5.19	371.148	4.87894e+06	3.71835e+06	5.8684e+06	5.50106e+06	9.23621e+06	1.0297e+07	7.98272e+06	1.17487e+07	1.04227e+07	6.17371e+06	1.18368e+07	1.06189e+07	8.08457e+06	8.82253e+06	9.16686e+06	--	--	--	-	-	-	-
Com_3533_pos	para-methoxy-Butyryl fentanyl-d7	--	C24 H25 [2]H7 N2 O2	6.512	388.305	2.10252e+07	1.8744e+07	1.91788e+07	1.96525e+07	1.61826e+07	1.54599e+07	1.73654e+07	1.89881e+07	1.37279e+07	2.04616e+07	2.02278e+07	1.89416e+07	1.88806e+07	1.90074e+07	2.0515e+07	--	--	--	-	-	-	-
Com_3268_pos	Papaverine HCl	--	C20 H21 N O4	5.418	340.16	1.44123e+07	1.25007e+07	1.16727e+07	1.24454e+07	2.58032e+07	2.3158e+07	1.91216e+07	1.73704e+07	1.96884e+07	1.95679e+07	2.08135e+07	2.08995e+07	1.66103e+07	2.1445e+07	1.85677e+07	--	--	--	-	-	-	-
Com_16148_pos	Ethyl oleate	--	C20 H38 O2	8.158	311.294	372509	566458	491495	396557	644277	728813	417010	328683	334646	396730	472233	543250	440986	495601	484573	Fatty Acyls	111-62-6	HMDB0034451	-	-	-	-
Com_1359_pos	1,8-diphenoxy-9,10-dihydroanthracene-9,10-dione	--	C26 H16 O4	5.576	393.115	5.79291e+07	5.29607e+07	3.80749e+07	3.79535e+07	7.92581e+07	7.54972e+07	7.44677e+07	6.84517e+07	5.89581e+07	6.06168e+07	6.13587e+07	6.46687e+07	6.15893e+07	6.38035e+07	6.21693e+07	--	--	--	-	-	-	-
Com_1548_pos	(6E,10E)-3,7,11,15-tetramethylhexadeca-1,6,10,14-tetraene-3,5,9-triol	--	C20 H34 O3	7.924	340.284	6.02858e+07	5.56932e+07	5.70087e+07	5.71834e+07	3.42332e+07	3.59723e+07	3.80394e+07	4.3375e+07	4.82941e+07	4.68036e+07	4.24635e+07	4.2768e+07	4.5192e+07	4.8608e+07	5.01261e+07	--	--	--	-	-	-	-
Com_4430_pos	N-(9-oxodecyl)acetamide	--	C12 H23 N O2	6.019	214.18	6.20169e+06	6.375e+06	3.76432e+06	3.69823e+06	6.60691e+06	1.70985e+07	9.20428e+06	8.57345e+06	7.36436e+06	6.41631e+06	6.23447e+06	6.90573e+06	6.29959e+06	6.37282e+06	7.45393e+06	--	--	--	-	-	-	-
Com_11471_pos	Troxipide	--	C15 H22 N2 O4	5.53	313.175	2.21541e+06	2.64216e+06	2.16245e+06	1.8823e+06	3.06291e+06	2.27584e+06	2.27668e+06	2.14031e+06	1.92444e+06	1.8476e+06	2.43023e+06	3.07849e+06	2.70756e+06	2.81029e+06	2.64618e+06	--	--	--	-	-	-	-
Com_6710_pos	--	5-Methyluridine	C10 H14 N2 O6	2.201	259.092	7.40765e+06	8.41676e+06	219223	201892	234294	226384	274076	247964	3.35392e+06	3.11199e+06	286441	291549	969437	1.07971e+06	1.25217e+06	Pyrimidine nucleosides	1463-10-1	HMDB0000884	-	-	-	-
Com_1393_pos	2,6-Di-tert-butyl-1,4-benzoquinone	--	C14 H20 O2	6.759	221.153	7.46623e+07	7.25281e+07	6.72563e+07	6.53379e+07	4.19208e+07	3.84605e+07	4.29724e+07	4.12859e+07	4.91985e+07	5.65898e+07	4.55949e+07	4.31308e+07	5.69534e+07	5.99042e+07	5.89185e+07	Prenol lipids	719-22-2	HMDB0013817	-	-	-	-
Com_1405_pos	3-Methylcrotonylglycine	--	C7 H11 N O3	2.121	176.091	6.01526e+07	5.86349e+07	6.16775e+07	6.45433e+07	3.99703e+07	4.22706e+07	3.77275e+07	3.69029e+07	5.12993e+07	4.9341e+07	4.8587e+07	4.52841e+07	5.31763e+07	4.78373e+07	4.88215e+07	Carboxylic acids and derivatives	33008-07-0	HMDB0000459	-	-	-	-
Com_4833_pos	L-Cysteinylglycine	--	C5 H10 N2 O3 S	5.292	162.022	1.51337e+07	1.41471e+07	9.67849e+06	1.01239e+07	7.17812e+06	7.8844e+06	6.63043e+06	5.58177e+06	9.67115e+06	9.30207e+06	4.92263e+06	4.97642e+06	1.01031e+07	8.84481e+06	9.28299e+06	Carboxylic acids and derivatives	19246-18-5	HMDB0000078	C01419	ko01100//Metabolic pathways;ko00480//Glutathione metabolism	Global and overview maps;Metabolism of other amino acids	Metabolism
Com_7655_pos	--	delta-Tridecalactone	C13 H24 O2	5.366	213.185	2.83893e+06	2.92264e+06	3.51938e+06	3.22953e+06	5.49553e+06	5.24127e+06	4.30366e+06	3.64339e+06	3.53779e+06	4.46992e+06	6.03563e+06	7.90165e+06	4.67839e+06	4.6563e+06	4.82024e+06	--	--	--	-	-	-	-
Com_13594_pos	Dehydrotumulosic acid	--	C31 H48 O4	11.728	485.36	652643	543896	519809	636743	1.30908e+06	1.86669e+06	861530	856617	505030	511354	694543	639075	662959	975146	963559	--	--	--	-	-	-	-
Com_13069_pos	--	Dl-3-Hydroxynorvaline	C5 H11 N O3	5.511	134.081	1.71608e+06	2.02324e+06	233794	249002	1.1923e+06	914168	434036	483653	506238	502795	663131	967717	1.17989e+06	791793	767536	--	--	--	-	-	-	-
Com_13542_pos	Uric acid	--	C5 H4 N4 O3	5.103	169.043	1.46488e+06	1.06344e+06	1.69833e+06	1.56718e+06	1.43579e+06	1.54292e+06	1.92529e+06	1.61071e+06	1.95435e+06	1.61927e+06	955061	1.00561e+06	1.04039e+06	1.34024e+06	1.39582e+06	Imidazopyrimidines	69-93-2	HMDB0000289	C00366	ko01100//Metabolic pathways;ko01120//Microbial metabolism in diverse environments;ko00230//Purine metabolism	Global and overview maps;Nucleotide metabolism	Metabolism
Com_394_pos	Jasmone	--	C11 H16 O	6.239	165.127	3.01348e+08	2.81646e+08	1.74754e+08	1.74492e+08	1.40177e+08	1.45747e+08	1.57453e+08	1.42627e+08	1.40471e+08	1.40426e+08	1.78329e+08	1.76063e+08	1.78944e+08	1.76797e+08	1.88682e+08	Organooxygen compounds	488-10-8	HMDB0035601	-	-	-	-
Com_764_pos	Isophorone	--	C9 H14 O	6.869	139.111	1.38233e+08	1.33237e+08	1.03593e+08	1.29366e+08	9.73792e+07	1.13499e+08	8.03709e+07	7.54966e+07	1.16708e+08	1.12437e+08	1.12122e+08	1.06388e+08	1.27492e+08	9.25637e+07	1.14634e+08	Carbonyl compounds	78-59-1	HMDB0031195	-	-	-	-
Com_13825_pos	--	Poricoic acid B	C30 H44 O5	8.727	485.325	1.59614e+06	1.46175e+06	1.41228e+06	1.39031e+06	1.34012e+06	1.49245e+06	1.56058e+06	1.88627e+06	1.66658e+06	1.59519e+06	1.09371e+06	1.27287e+06	1.43246e+06	1.14634e+06	1.38748e+06	--	--	--	-	-	-	-
Com_603_pos	fentanyl-d5	--	C22 H23 [2]H5 N2 O	7.47	360.274	1.62829e+08	1.42708e+08	1.5909e+08	1.59632e+08	5.95078e+07	5.93265e+07	7.21063e+07	6.61716e+07	1.66363e+08	1.59511e+08	1.00747e+08	1.23787e+08	1.14944e+08	1.13244e+08	1.13471e+08	--	--	--	-	-	-	-
Com_3873_pos	--	D-Erythrose 4-phosphate	C4 H9 O7 P	1.245	201.016	1.34911e+07	1.59932e+07	9.63479e+06	1.11093e+07	1.90418e+07	1.30667e+07	1.38172e+07	1.50318e+07	2.29554e+07	1.57518e+07	1.58239e+07	1.64845e+07	9.02815e+06	1.57942e+07	1.62025e+07	Organooxygen compounds	585-18-2	HMDB0001321	C00279	ko01100//Metabolic pathways;ko01110//Biosynthesis of secondary metabolites;ko01120//Microbial metabolism in diverse environments;ko01130//Biosynthesis of antibiotics;ko01230//Biosynthesis of amino acids;ko01200//Carbon metabolism;ko00030//Pentose phosphate pathway;ko00400//Phenylalanine, tyrosine and tryptophan biosynthesis;ko00750//Vitamin B6 metabolism;ko00710//Carbon fixation in photosynthetic…	Amino acid metabolism;Carbohydrate metabolism;Energy metabolism;Global and overview maps;Metabolism of cofactors and vitamins	Metabolism
Com_14856_pos	18 汕-Glycyrrhetintic Acid	--	C30 H46 O4	10.113	471.343	1.1216e+06	783485	468919	569632	1.30937e+06	1.21336e+06	855589	913415	1.1994e+06	831858	761048	1.07236e+06	835277	760320	1.15437e+06	--	--	--	-	-	-	-
Com_12275_pos	--	N alpha-Acetyl-L-lysine	C8 H16 N2 O3	4.635	189.123	2.4259e+06	2.45576e+06	2.22508e+06	2.06483e+06	2.07626e+06	2.04362e+06	1.89756e+06	1.68743e+06	1.25119e+06	1.40967e+06	1.40331e+06	1.54447e+06	1.65434e+06	1.66864e+06	2.31546e+06	--	--	--	-	-	-	-
Com_1585_pos	(2R)-2-[(2R,5S)-5-[(2S)-2-hydroxybutyl]oxolan-2-yl]propanoic acid	--	C11 H20 O4	5.917	199.133	4.45568e+07	6.24638e+07	3.58379e+07	2.20028e+07	2.48292e+07	2.12458e+07	2.32784e+07	1.97052e+07	3.40724e+07	3.43881e+07	3.00996e+07	2.71827e+07	2.43827e+07	3.22791e+07	3.87433e+07	--	--	--	-	-	-	-
Com_16069_pos	Lindenenol	--	C15 H18 O2	5.154	231.134	359264	260969	516974	407991	402003	491788	776272	540286	680488	554735	889359	836099	527559	355647	489196	--	--	--	-	-	-	-
Com_1191_pos	1,7-bis(4-hydroxyphenyl)heptan-3-one	--	C19 H22 O3	5.457	321.144	4.00412e+07	3.9092e+07	2.4373e+07	2.51851e+07	9.312e+07	8.55319e+07	4.20528e+07	3.54183e+07	5.7844e+07	5.32909e+07	3.05281e+07	3.28524e+07	4.56778e+07	4.63038e+07	4.80067e+07	Diarylheptanoids	-	HMDB0138216	-	-	-	-
Com_8209_pos	Kushenol F	--	C25 H28 O6	4.741	425.203	5.26884e+06	4.50672e+06	3.17136e+06	2.72759e+06	6.18537e+06	4.73571e+06	4.20995e+06	4.47911e+06	3.64356e+06	5.12712e+06	3.86546e+06	3.44295e+06	3.96489e+06	4.81552e+06	5.19255e+06	--	--	--	-	-	-	-
Com_6035_pos	Clofazimine	--	C27 H22 Cl2 N4	5.031	473.129	7.54543e+06	7.08983e+06	6.10382e+06	5.63161e+06	4.05285e+06	4.7871e+06	8.81743e+06	7.0527e+06	1.18398e+07	1.14837e+07	8.03035e+06	9.31008e+06	8.84044e+06	5.90691e+06	7.31886e+06	Diazanaphthalenes	2030-63-9	HMDB0014983	-	-	-	-
Com_12933_pos	Schisanhenol	--	C23 H30 O6	4.732	403.218	2.16919e+06	1.35784e+06	1.58082e+06	1.86665e+06	749897	852010	1.67108e+06	1.63907e+06	1.7508e+06	1.62638e+06	1.37819e+06	1.33778e+06	1.62751e+06	1.35569e+06	1.50731e+06	--	--	--	-	-	-	-
Com_6288_pos	--	Fragransin A2	C20 H24 O5	5.414	345.169	3.69855e+06	4.88578e+06	8.7665e+06	5.44166e+06	5.23865e+06	5.7465e+06	5.10858e+06	3.4187e+06	6.7863e+06	3.70811e+06	5.12642e+06	5.98682e+06	2.9017e+06	5.66073e+06	4.99382e+06	--	--	--	-	-	-	-
Com_9569_pos	Usaramine	--	C18 H25 N O6	5.893	330.19	4.67068e+06	4.36596e+06	2.76151e+06	2.52928e+06	2.88982e+06	3.12705e+06	1.97088e+06	1.79139e+06	3.07913e+06	2.15689e+06	3.53122e+06	4.94242e+06	3.34961e+06	3.26701e+06	2.02158e+06	--	--	--	-	-	-	-
Com_3619_pos	Magnolol	--	C18 H18 O2	4.851	267.143	2.27726e+07	1.77156e+07	1.60504e+07	1.56228e+07	2.03151e+07	1.98226e+07	2.13854e+07	2.0812e+07	1.5439e+07	2.22307e+07	2.38966e+07	2.2111e+07	1.9823e+07	1.85985e+07	2.00186e+07	--	--	--	-	-	-	-
Com_890_pos	3-Methoxy prostaglandin F1汐	--	C21 H38 O6	7.093	391.245	7.27374e+07	7.51756e+07	9.71207e+07	9.01781e+07	7.49566e+07	8.04632e+07	1.44756e+08	1.26038e+08	7.60658e+07	9.68976e+07	1.17739e+08	1.2015e+08	8.87877e+07	1.0032e+08	1.15217e+08	--	--	--	-	-	-	-
Com_11277_pos	Quillaic acid	--	C30 H46 O5	8.344	487.341	2.53274e+06	1.82361e+06	2.82697e+06	2.51845e+06	1.45142e+06	1.6556e+06	2.32715e+06	2.01346e+06	2.32456e+06	2.07253e+06	2.00464e+06	2.0813e+06	2.07267e+06	1.90223e+06	2.42236e+06	--	--	--	-	-	-	-
Com_714_pos	Arachidonoyl amide	--	C20 H33 N O	6.767	304.263	1.33641e+08	9.45957e+07	1.02941e+08	9.37592e+07	1.62898e+08	9.97822e+07	5.86157e+07	1.67811e+08	7.06369e+07	1.2663e+08	7.55933e+07	7.45411e+07	1.01134e+08	5.51103e+07	7.49479e+07	--	--	--	-	-	-	-
Com_9840_pos	Lactitol	--	C12 H24 O11	5.4	345.143	837192	660376	781499	626799	4.3363e+06	3.91661e+06	2.35594e+06	2.26796e+06	1.28472e+06	1.62768e+06	2.55895e+06	2.15444e+06	2.44133e+06	2.30783e+06	2.51772e+06	Fatty Acyls	585-86-4	HMDB0040937	-	-	-	-
Com_3970_pos	4-Hydroxybenzophenone	--	C13 H10 O2	5.447	199.075	1.74571e+07	1.7126e+07	1.6425e+07	1.61475e+07	1.69802e+07	1.85518e+07	1.90285e+07	1.53149e+07	1.97139e+07	1.76279e+07	2.22459e+07	2.24217e+07	1.72187e+07	1.80599e+07	1.76948e+07	--	--	--	-	-	-	-
Com_3750_pos	N-Acetylsphingosine	--	C20 H39 N O3	8.311	364.282	1.23087e+07	1.14711e+07	1.16627e+07	1.16772e+07	1.44825e+07	1.44904e+07	2.19684e+07	2.07472e+07	1.36614e+07	1.72389e+07	2.47519e+07	1.55292e+07	1.56272e+07	1.62915e+07	1.96119e+07	--	--	--	-	-	-	-
Com_7769_pos	--	2-(Dimethylamino)Guanosine	C12 H17 N5 O5	5.388	312.131	2.05434e+06	1.74601e+06	3.07848e+06	2.80529e+06	2.79716e+06	2.63201e+06	4.63097e+06	3.97734e+06	2.61087e+06	3.55803e+06	6.25056e+06	7.70329e+06	4.50303e+06	3.73295e+06	3.40927e+06	--	--	--	-	-	-	-
Com_8103_pos	Gatifloxacin	--	C19 H22 F N3 O4	10.106	376.17	4.61924e+06	4.45375e+06	5.51479e+06	4.8796e+06	4.95131e+06	5.66922e+06	4.70354e+06	5.7125e+06	3.98893e+06	3.93124e+06	3.74527e+06	2.92864e+06	6.32906e+06	5.38504e+06	6.51808e+06	Quinolines and derivatives	112811-59-3	HMDB0015178	-	-	-	-
Com_4580_pos	--	N-Oleoyl Glycine	C20 H37 N O3	8.654	340.284	2.79628e+06	2.066e+06	2.44443e+06	1.58855e+06	1.16052e+06	1.60842e+07	2.85349e+06	2.63994e+06	2.16296e+06	2.27547e+06	2.27136e+06	1.75603e+06	2.02112e+06	2.61653e+06	2.62633e+06	--	--	--	-	-	-	-
Com_4590_pos	N-(2-Furoyl)glycine	--	C7 H7 N O4	2.516	170.045	1.51432e+07	1.37904e+07	1.14332e+07	1.04813e+07	1.26467e+07	1.49033e+07	1.80854e+07	1.67502e+07	1.50854e+07	1.61421e+07	1.63938e+07	1.59388e+07	1.39139e+07	1.62029e+07	1.46719e+07	Carboxylic acids and derivatives	5657-19-2	HMDB0000439	-	-	-	-
Com_14259_pos	Maltitol	--	C12 H24 O11	4.81	362.173	1.23115e+06	1.50376e+06	1.00821e+06	936931	1.27019e+06	1.25249e+06	1.5511e+06	1.58482e+06	928697	1.27965e+06	1.65987e+06	1.07417e+06	1.09472e+06	1.40415e+06	1.27783e+06	Fatty Acyls	585-88-6	HMDB0002928	-	-	-	-
Com_5065_pos	(2R,3S,4S,5R,6R)-2-(hydroxymethyl)-6-(2-phenylethoxy)oxane-3,4,5-triol	--	C14 H20 O6	5.525	307.115	1.4239e+07	8.42767e+06	4.80968e+06	5.01626e+06	3.91476e+06	7.81455e+06	4.11935e+06	3.54299e+06	5.71501e+06	6.57477e+06	5.99507e+06	6.87338e+06	6.79068e+06	5.48254e+06	6.57694e+06	--	--	--	-	-	-	-
Com_7193_pos	Strophanthidin	--	C23 H32 O6	6.587	405.225	5.94594e+06	6.28759e+06	6.07237e+06	6.60621e+06	5.20801e+06	4.6119e+06	6.31044e+06	6.74785e+06	7.91698e+06	7.42944e+06	6.58854e+06	6.19519e+06	6.29401e+06	7.47771e+06	6.27438e+06	--	--	--	-	-	-	-
Com_4876_pos	Ergosterol peroxide	--	C28 H44 O3	7.512	429.336	7.23613e+06	9.21966e+06	1.31269e+07	1.14953e+07	3.73552e+06	5.65416e+06	6.76483e+06	7.37132e+06	7.84635e+06	7.4866e+06	5.93493e+06	6.64574e+06	7.85045e+06	8.34295e+06	9.59493e+06	Steroids and steroid derivatives	2061-64-5	HMDB0037941	-	-	-	-
Com_2121_pos	--	Stachydrine	C7 H13 N O2	1.379	144.102	3.2986e+07	3.74194e+07	3.2888e+07	3.17975e+07	4.65879e+07	3.73866e+07	3.91501e+07	2.55763e+07	3.62645e+07	2.97362e+07	5.26307e+07	4.09528e+07	3.38404e+07	3.04066e+07	3.18542e+07	Carboxylic acids and derivatives	471-87-4	HMDB0004827	-	-	-	-
Com_7306_pos	2-{4-[(4-methylphenyl)sulfonyl]piperazino}-1-morpholino-1-ethanone	--	C17 H25 N3 O4 S	7.091	346.187	3.91611e+06	3.68096e+06	2.89559e+06	2.41822e+06	5.44709e+06	7.59499e+06	3.63683e+06	3.27238e+06	4.28816e+06	4.4729e+06	2.32034e+06	3.07983e+06	4.31221e+06	3.46263e+06	3.60827e+06	--	--	--	-	-	-	-
Com_13440_pos	--	Lysopg 18:1	C24 H47 O9 P	7.676	511.303	1.10967e+06	1.85355e+06	1.16882e+06	1.05365e+06	1.01715e+06	1.06569e+06	1.6553e+06	1.46518e+06	971715	1.05524e+06	1.15413e+06	1.12902e+06	1.35819e+06	1.73045e+06	1.54218e+06	--	--	--	-	-	-	-
Com_1138_pos	--	trans-3-Indoleacrylic acid	C11 H9 N O2	5.49	188.07	1.60993e+07	1.63949e+07	1.18619e+07	9.1846e+06	8.55064e+07	9.88507e+07	4.36916e+07	4.00551e+07	2.4945e+07	2.44582e+07	1.82566e+07	2.16171e+07	3.72723e+07	3.77876e+07	3.63121e+07	--	--	--	-	-	-	-
Com_13507_pos	--	Glibenclamide	C23 H28 Cl N3 O5 S	4.942	494.15	1.16565e+06	1.25454e+06	727901	753008	1.40419e+06	1.23106e+06	1.57452e+06	2.05211e+06	1.89272e+06	1.14404e+06	1.16718e+06	903174	1.23163e+06	1.41235e+06	1.06034e+06	Benzene and substituted derivatives	10238-21-8	HMDB0015151	-	-	-	-
Com_8441_pos	N'2-(2-furylmethylidene)-3-aminopyrazine-2-carbohydrazide	--	C10 H9 N5 O2	1.381	232.081	2.94743e+06	2.45497e+06	4.83171e+06	4.85225e+06	2.81574e+06	5.72435e+06	4.42689e+06	6.27905e+06	4.32055e+06	3.98045e+06	2.81681e+06	3.6607e+06	3.38763e+06	4.02778e+06	3.4634e+06	--	--	--	-	-	-	-
Com_7537_pos	Etiocholanolone	--	C19 H30 O2	10.426	581.462	469799	463707	517064	445670	4.92243e+06	7.17767e+06	430828	417044	406832	374261	348017	322972	440116	448681	420184	Steroids and steroid derivatives	53-42-9	HMDB0000490	-	-	-	-
Com_5023_pos	--	Kynurenic acid	C10 H7 N O3	5.252	190.05	1.42598e+07	1.34526e+07	4.1068e+06	3.9621e+06	1.21348e+07	1.18198e+07	4.81672e+06	4.36028e+06	6.11551e+06	5.45531e+06	9.9926e+06	1.03056e+07	7.24386e+06	8.21112e+06	7.53424e+06	Quinolines and derivatives	492-27-3	HMDB0000715	C01717	ko01100//Metabolic pathways;ko00380//Tryptophan metabolism	Amino acid metabolism;Global and overview maps	Metabolism
Com_2166_pos	Secoxyloganin	--	C17 H24 O11	5.057	405.137	2.92458e+07	2.44886e+07	1.33978e+07	1.38427e+07	2.92711e+07	2.46731e+07	1.55454e+06	4.21656e+07	1.77237e+07	4.43468e+07	3.5008e+07	3.33118e+07	4.51814e+07	3.65366e+07	3.9937e+07	--	--	--	-	-	-	-
Com_8462_pos	Ouabain	--	C29 H44 O12	6.609	567.277	903923	1.35062e+06	1.54702e+06	1.08121e+06	2.24047e+06	1.43876e+06	6.47718e+06	6.24676e+06	5.2286e+06	5.31316e+06	2.6297e+06	3.17407e+06	2.8835e+06	1.97273e+06	3.0303e+06	Steroids and steroid derivatives	-	HMDB0031448	-	-	-	-
Com_3591_pos	Cinchonine	--	C19 H22 N2 O	5.175	295.176	1.31489e+06	1.49452e+06	708879	908038	1.45399e+06	2.25866e+07	1.21755e+06	2.39293e+06	2.66569e+06	1.69611e+06	1.59626e+07	1.58119e+06	1.27645e+06	1.38197e+06	1.68518e+06	--	--	--	-	-	-	-
Com_1921_pos	Colchicine	--	C22 H25 N O6	5.571	400.178	4.48215e+07	5.00781e+07	2.81742e+07	2.3393e+07	3.04201e+07	3.48336e+07	3.93382e+07	3.58764e+07	1.58018e+07	3.05886e+07	4.22885e+07	4.14755e+07	4.06902e+07	3.88984e+07	3.5335e+07	Tropones	64-86-8	HMDB0015466	C07592	ko01110//Biosynthesis of secondary metabolites;ko00950//Isoquinoline alkaloid biosynthesis	Biosynthesis of other secondary metabolites;Global and overview maps	Metabolism
Com_1224_pos	--	Geranylacetone	C13 H22 O	5.624	195.174	4.34862e+07	4.3409e+07	5.55691e+07	5.48103e+07	7.01384e+07	7.45583e+07	6.71255e+07	6.07289e+07	6.71747e+07	6.16579e+07	9.76797e+07	1.01193e+08	7.03715e+07	6.67729e+07	7.02697e+07	Prenol lipids	3796-70-1	HMDB0031846	-	-	-	-
Com_8040_pos	PC (18:2e/2:0)	--	C28 H54 N O7 P	9.636	548.371	2.83106e+06	3.37617e+06	5.2273e+06	4.22788e+06	1.57296e+06	1.8769e+06	6.88933e+06	6.86454e+06	6.09589e+06	6.31397e+06	3.18994e+06	3.39159e+06	4.21947e+06	4.12081e+06	3.84454e+06	--	--	--	-	-	-	-
Com_15914_pos	--	NG,NG-Dimethyl-L-arginine	C8 H20 Cl2 N4 O2	4.848	275.102	784777	581473	551875	367376	842080	817547	473928	476146	517876	472706	681061	677659	678713	573767	632908	Carboxylic acids and derivatives	30315-93-6	HMDB0001539	-	-	-	-
Com_15457_pos	Echinocystic acid	--	C30 H48 O4	9.05	473.36	881921	855603	861258	426673	905082	674812	524576	812146	581207	497455	1.03954e+06	1.18939e+06	714252	589329	777307	--	--	--	-	-	-	-
Com_2093_pos	Cerivastatin	--	C26 H34 F N O5	6.274	460.247	2.06954e+07	1.76781e+07	2.28586e+07	3.79806e+06	3.59454e+07	1.21487e+07	1.50472e+07	3.35234e+06	4.09352e+07	5.18702e+07	1.01882e+07	7.44142e+06	1.50554e+07	1.6189e+07	1.7356e+07	--	--	--	-	-	-	-
Com_13793_pos	20(S)-Protopanaxadiol	--	C30 H52 O3	10.181	483.381	1.20617e+06	1.14493e+06	813345	837321	1.4202e+06	1.3178e+06	1.94823e+06	1.90303e+06	1.06051e+06	994990	1.25177e+06	1.09296e+06	1.28251e+06	1.2625e+06	1.43429e+06	Prenol lipids	-	HMDB0035777	-	-	-	-
Com_1408_pos	Piperine	--	C17 H19 N O3	4.625	286.139	2.63299e+07	1.46415e+07	4.94326e+07	2.48942e+07	4.4741e+07	7.58885e+07	2.04757e+07	3.21992e+07	3.20107e+07	2.90012e+07	5.12459e+07	4.97887e+07	4.69021e+07	4.60466e+07	3.06615e+07	-	94-62-2	HMDB0029377	C03882	ko00960//Tropane, piperidine and pyridine alkaloid biosynthesis	Biosynthesis of other secondary metabolites	Metabolism
Com_5760_pos	5-Fluoro-2-[(3S)-1-(2-methylbenzyl)-3-pyrrolidinyl]-1H-benzimidazole	--	C19 H20 F N3	4.653	310.176	9.88965e+06	1.08769e+07	3.71189e+06	4.09839e+06	5.41075e+06	5.93755e+06	3.7245e+06	3.2369e+06	3.55202e+06	4.37218e+06	2.72459e+06	2.54276e+06	5.16292e+06	5.34682e+06	5.15812e+06	--	--	--	-	-	-	-
Com_9679_pos	6-methyl-7-nitro-2,3-dihydro-1,4-benzodioxine	--	C9 H9 N O4	4.727	178.049	4.4268e+06	3.80955e+06	2.68545e+06	2.77037e+06	4.11324e+06	4.34038e+06	3.63333e+06	3.72644e+06	4.87156e+06	4.94893e+06	4.08362e+06	3.66394e+06	3.67608e+06	3.97521e+06	4.02311e+06	--	--	--	-	-	-	-
Com_1755_pos	methyl 2-[(2-acetyl-3-oxo-1-butenyl)amino]acetate	--	C9 H13 N O4	4.871	200.091	3.33819e+07	3.41283e+07	2.08846e+07	1.72349e+07	5.14384e+07	5.84817e+07	2.93266e+07	2.94336e+07	3.76708e+07	3.49063e+07	6.05598e+07	5.46045e+07	3.46201e+07	3.93176e+07	3.71446e+07	--	--	--	-	-	-	-
Com_12120_pos	--	Ademetionine	C15 H22 N6 O5 S	1.292	399.144	2.67385e+06	2.19236e+06	1.95201e+06	1.7889e+06	2.15958e+06	1.90997e+06	1.43746e+06	2.8487e+06	1.9192e+06	1.83049e+06	1.74154e+06	1.67506e+06	1.73755e+06	1.6873e+06	2.12675e+06	5'-deoxyribonucleosides	485-80-3	HMDB0001185	C00019	ko01100//Metabolic pathways;ko01110//Biosynthesis of secondary metabolites;ko01130//Biosynthesis of antibiotics;ko01230//Biosynthesis of amino acids;ko00270//Cysteine and methionine metabolism;ko00330//Arginine and proline metabolism;ko00261//Monobactam biosynthesis;ko00908//Zeatin biosynthesis;ko04122//Sulfur relay system	Amino acid metabolism;Biosynthesis of other secondary metabolites;Folding, sorting and degradation;Global and overview maps;Metabolism of terpenoids and polyketides	Genetic Information Processing;Metabolism
Com_5688_pos	Dexchlorpheniramine	--	C16 H19 Cl N2	5.546	275.127	1.1861e+07	1.07695e+07	6.25598e+06	6.01423e+06	6.46723e+06	4.8931e+06	7.10904e+06	7.82099e+06	6.67199e+06	6.49124e+06	9.92457e+06	1.00415e+07	8.06807e+06	8.24879e+06	7.42619e+06	Pyridines and derivatives	25523-97-1	HMDB0240218	-	-	-	-
Com_6210_pos	Cyclohexyl fentanyl-d5	--	C26 H29 [2]H5 N2 O	8.676	396.311	9.00781e+06	8.31162e+06	8.49462e+06	7.8403e+06	4.02077e+06	4.63501e+06	7.81435e+06	8.57688e+06	1.03955e+07	1.1038e+07	1.16475e+07	1.10977e+07	9.01706e+06	6.01789e+06	7.528e+06	--	--	--	-	-	-	-
Com_1283_pos	Dehydroevodiamine	--	C19 H15 N3 O	5.27	302.123	5.76213e+07	5.12072e+07	6.75251e+07	7.21966e+07	7.55928e+07	7.17808e+07	6.59372e+07	5.92341e+07	7.57011e+07	8.57205e+07	7.01294e+07	6.62072e+07	7.18994e+07	6.95382e+07	7.76464e+07	--	--	--	-	-	-	-
Com_4048_pos	Heptadecanoic Acid	--	C17 H34 O2	8.359	293.247	1.5232e+07	1.75601e+07	1.72243e+07	1.548e+07	1.18629e+07	1.13405e+07	1.22665e+07	1.29937e+07	1.56381e+07	1.25037e+07	1.34977e+07	1.21609e+07	1.35528e+07	1.42809e+07	1.41931e+07	Fatty Acyls	3546-17-6	HMDB0006497	-	-	-	-
Com_13590_pos	Kanamycin	--	C18 H36 N4 O11	6.431	485.235	1.80988e+06	1.2841e+06	971062	1.58762e+06	1.26615e+06	1.08346e+06	1.18195e+06	1.26113e+06	1.43429e+06	891830	1.52009e+06	1.42195e+06	1.40889e+06	1.27916e+06	1.3885e+06	Organooxygen compounds	2251180	HMDB0015303	-	-	-	-
Com_1993_pos	(1E,4E)-1,5-bis(4-methoxyphenyl)penta-1,4-dien-3-one	--	C19 H18 O3	5.317	317.12	4.19158e+07	4.04522e+07	3.78615e+07	4.23149e+07	1.35541e+07	4.81188e+07	1.65705e+07	4.22502e+07	4.71784e+07	5.54312e+07	4.88767e+07	4.55614e+07	2.5028e+07	4.72707e+07	4.82552e+07	--	--	--	-	-	-	-
Com_15758_pos	--	Lumichrome	C12 H10 N4 O2	5.709	243.087	716319	828639	680873	582351	351570	319769	648910	363613	770945	641373	262258	367752	604246	644256	951447	--	--	--	C01727	ko00740//Riboflavin metabolism	Metabolism of cofactors and vitamins	Metabolism
Com_3409_pos	Hydroquinidine	--	C20 H26 N2 O2	5.21	327.201	7.73104e+06	7.00692e+06	7.6534e+06	8.68444e+06	1.47898e+07	2.44342e+07	1.04269e+07	9.9595e+06	1.26916e+07	1.17045e+07	1.31971e+07	1.06579e+07	1.10226e+07	1.25317e+07	1.17116e+07	--	--	--	-	-	-	-
Com_9334_pos	Acetylresveratrol	--	C20 H18 O6	5.037	355.122	2.15703e+06	2.14538e+06	2.01574e+06	1.70841e+06	2.89987e+06	2.25966e+06	3.37855e+06	2.22011e+06	2.60537e+06	2.47047e+06	3.80978e+06	5.4536e+06	3.9416e+06	3.25422e+06	3.01953e+06	--	--	--	-	-	-	-
Com_7330_pos	--	Nitidine	C21 H18 N O4	7.198	349.131	4.36378e+06	4.49348e+06	3.44544e+06	2.76441e+06	7.58256e+06	5.8827e+06	6.38068e+06	5.86264e+06	4.1549e+06	5.26699e+06	6.89151e+06	7.56991e+06	5.25062e+06	5.32176e+06	5.7879e+06	--	--	--	-	-	-	-
Com_11692_pos	--	N-Acetyl-L-Tyrosine	C11 H13 N O4	4.793	224.092	1.30211e+06	1.3394e+06	636467	592487	2.92998e+06	2.74478e+06	2.08855e+06	2.151e+06	1.41015e+06	1.6613e+06	1.30183e+06	1.79269e+06	1.72832e+06	1.45354e+06	1.48972e+06	Carboxylic acids and derivatives	537-55-3	HMDB0000866	-	-	-	-
Com_9665_pos	4-[8-chloro-2-(trifluoromethyl)-4-quinolyl]morpholine	--	C14 H12 Cl F3 N2 O	5.374	317.065	3.55202e+06	2.38369e+06	1.64536e+06	1.7053e+06	4.50772e+06	3.38985e+06	3.05847e+06	2.2925e+06	2.8251e+06	2.79046e+06	3.6071e+06	4.09528e+06	3.00305e+06	2.70268e+06	2.92989e+06	--	--	--	-	-	-	-
Com_13358_pos	Alosetron	--	C17 H18 N4 O	5.22	295.153	1.08861e+06	1.17548e+06	1.15258e+06	1.46331e+06	1.96713e+06	1.37705e+06	1.45654e+06	1.41345e+06	1.60505e+06	1.62608e+06	2.23176e+06	2.24153e+06	1.50811e+06	1.52414e+06	1.84898e+06	Indoles and derivatives	122852-42-0	HMDB0015104	-	-	-	-
Com_7705_pos	N-Stearoyl taurine	--	C20 H41 N O4 S	8.722	392.278	204285	195120	5.58699e+06	5.8799e+06	1.85227e+06	1.96788e+06	4.05909e+06	2.60719e+06	259312	191627	574882	359230	1.9711e+06	2.83809e+06	2.02147e+06	--	--	--	-	-	-	-
Com_7931_pos	2-(cyclopropylcarbonyl)-3-(4-fluoroanilino)acrylonitrile	--	C13 H11 F N2 O	1.383	253.07	3.50795e+06	3.86893e+06	2.41996e+06	3.3672e+06	6.57217e+06	3.76731e+06	4.68852e+06	5.56104e+06	6.00533e+06	6.20268e+06	6.14282e+06	5.79472e+06	4.18865e+06	4.11762e+06	5.08262e+06	--	--	--	-	-	-	-
Com_7858_pos	Alternariol	--	C14 H10 O5	5.029	259.06	652073	698111	663817	645524	2.04774e+06	2.77546e+06	2.18312e+06	2.33796e+06	922742	1.05408e+06	7.73769e+06	6.92551e+06	2.70549e+06	1.93414e+06	2.22528e+06	Coumarins and derivatives	641-38-3	HMDB0030831	-	-	-	-
Com_12076_pos	Daidzin	--	C21 H20 O9	5.278	395.132	2.00702e+06	1.61064e+06	1.175e+06	1.34269e+06	2.30779e+06	2.67685e+06	1.65783e+06	1.74633e+06	1.29352e+06	1.7064e+06	2.10894e+06	2.03939e+06	1.57833e+06	1.70662e+06	2.10352e+06	Isoflavonoids	552-66-9	HMDB0033991	C10216	ko00943//Isoflavonoid biosynthesis	Biosynthesis of other secondary metabolites	Metabolism
Com_801_pos	1-adamantyl(1,4-thiazinan-4-yl)methanone	--	C15 H23 N O S	1.245	266.159	6.75013e+07	7.20176e+07	9.24823e+07	1.22571e+08	5.92552e+07	5.06111e+07	1.15954e+08	1.21248e+08	1.18337e+08	1.23847e+08	1.59353e+08	1.3512e+08	1.1328e+08	9.45797e+07	9.8831e+07	--	--	--	-	-	-	-
Com_2458_pos	4-Guanidinobutyric acid	--	C5 H11 N3 O2	1.748	146.092	2.23565e+07	2.6349e+07	2.03023e+07	1.89796e+07	3.18298e+07	2.91691e+07	1.7889e+07	1.79745e+07	3.68476e+07	4.1453e+07	2.80012e+07	2.71851e+07	2.277e+07	2.54623e+07	2.38384e+07	Carboxylic acids and derivatives	463-00-3	HMDB0003464	C01035	ko01100//Metabolic pathways;ko00330//Arginine and proline metabolism	Amino acid metabolism;Global and overview maps	Metabolism
Com_4527_pos	N6-Isopentenyladenosine	--	C15 H21 N5 O4	5.301	336.165	1.36518e+07	1.31762e+07	1.15849e+07	1.0211e+07	1.79085e+06	1.64815e+07	1.18502e+07	1.02501e+07	1.37997e+07	1.71927e+07	1.54179e+07	1.65225e+07	1.49978e+07	1.32224e+07	1.39295e+07	--	--	--	-	-	-	-
Com_4439_pos	Viramune	--	C15 H14 N4 O	5.198	267.122	1.47548e+07	1.50256e+07	1.37156e+07	1.33615e+07	1.41894e+07	1.7015e+07	1.26199e+07	1.2656e+07	1.45958e+07	1.46704e+07	1.34408e+07	1.39851e+07	1.34073e+07	1.53981e+07	1.64297e+07	Organonitrogen compounds	129618-40-2	HMDB0014383	-	-	-	-
Com_12596_pos	6-(3-hydroxybutan-2-yl)-5-(hydroxymethyl)-4-methoxy-2H-pyran-2-one	--	C11 H16 O5	5.466	211.096	1.58401e+06	1.79775e+06	1.38953e+06	1.51832e+06	2.26063e+06	1.97585e+06	1.6853e+06	1.54608e+06	1.69613e+06	1.74924e+06	2.77958e+06	2.24993e+06	2.19283e+06	1.89752e+06	1.76124e+06	--	--	--	-	-	-	-
Com_5513_pos	PE (18:5e/24:2)	--	C47 H82 N O7 P	11.372	804.587	231561	213295	205272	1.03977e+07	288766	281324	243488	413666	235921	270403	245344	247357	287853	237548	231928	--	--	--	-	-	-	-
Com_4004_pos	Thymidine	--	C10 H14 N2 O5	1.222	243.099	1.56887e+07	1.5695e+07	1.58495e+07	1.66582e+07	1.80837e+07	1.6827e+07	1.96466e+07	2.03303e+07	1.75392e+07	1.33583e+07	1.94595e+07	2.06213e+07	1.55003e+07	1.33633e+07	1.6733e+07	Pyrimidine nucleosides	50-89-5	HMDB0000273	C00214	ko01100//Metabolic pathways;ko00240//Pyrimidine metabolism	Global and overview maps;Nucleotide metabolism	Metabolism
Com_7854_pos	Tanespimycin	--	C31 H43 N3 O8	7.401	603.35	3.4345e+06	3.93986e+06	3.69046e+06	3.25823e+06	5.71435e+06	6.07253e+06	4.05927e+06	3.94209e+06	1.66406e+06	1.33932e+06	4.33724e+06	3.28585e+06	3.41448e+06	6.55813e+06	6.99058e+06	--	--	--	-	-	-	-
Com_177_pos	--	Cycloleucine	C6 H11 N O2	1.54	130.086	7.88663e+07	6.78981e+07	5.57253e+07	4.93965e+07	7.36848e+08	7.36353e+08	1.96069e+08	3.06117e+08	7.723e+07	7.45219e+07	1.51232e+08	1.73848e+08	2.68561e+08	2.38798e+08	2.38313e+08	--	--	--	-	-	-	-
Com_5658_pos	Scopolamine butylbromide	--	C13 H31 N5 Na O3 P	5.423	360.212	1.02475e+07	1.06165e+07	1.02001e+07	1.00062e+07	4.61065e+06	4.74944e+06	1.13392e+07	9.74471e+06	7.12609e+06	8.14407e+06	5.50163e+06	5.18477e+06	6.99988e+06	7.88943e+06	8.27194e+06	--	--	--	-	-	-	-
Com_5848_pos	17汐-Methyl-androstan-3-hydroxyimine-17汕-ol	--	C20 H33 N O2	6.99	320.258	8.92531e+06	7.83891e+06	8.59075e+06	7.88072e+06	1.04584e+07	1.10986e+07	2.43996e+06	3.49289e+06	2.88144e+06	2.26276e+06	4.13658e+06	4.76433e+06	7.04123e+06	6.68672e+06	6.21214e+06	--	--	--	-	-	-	-
Com_500_pos	Prostaglandin H1	--	C20 H34 O5	8.283	337.234	2.04909e+08	1.82655e+08	2.01737e+08	1.81681e+08	4.99184e+07	3.74338e+07	5.94615e+07	6.73886e+07	1.15744e+08	1.41993e+08	1.50361e+08	1.41413e+08	1.22844e+08	1.44514e+08	1.52576e+08	Fatty Acyls	-	HMDB0013041	-	-	-	-
Com_10670_pos	--	Jervine	C27 H39 N O3	9.527	426.3	2.9889e+06	3.44887e+06	376694	630446	2.72126e+06	3.257e+06	382898	654327	1.05235e+06	983017	365113	393947	1.4291e+06	1.24206e+06	1.357e+06	--	--	--	-	-	-	-
Com_3029_pos	N~5~-(pyridin-2-ylmethyl)-1H-1,2,4-triazole-3,5-diamine	--	C8 H10 N6	1.369	191.102	1.797e+07	1.26127e+07	1.51741e+07	1.56474e+07	2.65095e+07	2.56753e+07	1.65752e+07	1.91087e+07	2.23344e+07	1.5284e+07	3.16334e+07	3.22641e+07	1.92645e+07	1.81642e+07	2.75789e+07	--	--	--	-	-	-	-
Com_5978_pos	PE (14:0e/22:1)	--	C41 H82 N O7 P	11.372	732.589	222962	205374	197650	9.1143e+06	278044	270877	234447	228511	227161	219710	236234	238172	277164	228727	223316	--	--	--	-	-	-	-
Com_7570_pos	--	L-Saccharopine	C11 H20 N2 O6	7.347	277.14	5.73377e+06	5.43819e+06	6.35231e+06	6.04405e+06	2.63283e+06	3.77968e+06	5.52063e+06	5.45482e+06	6.46051e+06	5.81158e+06	6.70007e+06	6.60584e+06	5.23457e+06	5.42134e+06	5.23593e+06	Carboxylic acids and derivatives	-	HMDB0062698	C00449	ko01100//Metabolic pathways;ko01110//Biosynthesis of secondary metabolites;ko01130//Biosynthesis of antibiotics;ko01230//Biosynthesis of amino acids;ko00300//Lysine biosynthesis;ko00310//Lysine degradation	Amino acid metabolism;Global and overview maps	Metabolism
Com_12871_pos	2-Thio-acetyl MAGE	--	C21 H42 O3 S	9.753	397.271	1.45708e+06	1.29917e+06	1.66047e+06	1.68371e+06	1.26361e+06	1.26542e+06	2.15396e+06	1.68649e+06	1.12191e+06	1.01692e+06	1.18711e+06	1.08525e+06	1.53997e+06	1.95931e+06	2.33649e+06	--	--	--	-	-	-	-
Com_2783_pos	(+/-)5(6)-EET Ethanolamide	--	C22 H37 N O3	8.724	364.284	2.70595e+07	3.03977e+07	2.6359e+07	2.4969e+07	1.4841e+07	1.59839e+07	1.64928e+06	1.45529e+06	1.25588e+06	1.29861e+06	4.93783e+06	4.99136e+06	1.34069e+07	1.43256e+07	1.40247e+07	--	--	--	-	-	-	-
Com_5759_pos	Toosendanin	--	C30 H38 O11	10.321	597.238	8.7029e+06	7.68901e+06	6.39092e+06	5.62757e+06	4.74077e+06	6.76413e+06	1.04618e+07	5.34232e+06	1.0182e+07	7.57416e+06	1.05941e+07	9.26917e+06	6.61344e+06	7.81646e+06	1.19581e+07	--	--	--	-	-	-	-
Com_14524_pos	--	Dehydro-23-O-Acetylalisol B	C32 H48 O5	9.392	513.356	1.48069e+06	1.21794e+06	857752	1.11666e+06	649908	660796	682607	621036	1.37799e+06	725920	599630	678275	916515	671795	485110	--	--	--	-	-	-	-
Com_3240_pos	(4-benzoylpiperidino)[4-(tert-butyl)phenyl]methanone	--	C23 H27 N O2	5.426	372.199	6.18328e+06	1.36001e+07	1.11633e+07	9.70884e+06	3.21879e+06	1.37946e+07	7.6164e+06	7.31706e+06	3.01652e+06	2.87333e+07	5.95999e+06	7.27693e+06	9.63205e+06	9.18218e+06	6.67722e+06	--	--	--	-	-	-	-
Com_3889_pos	N'2-(2-furylcarbonyl)-3-chloro-4-methylthiophene-2-carbohydrazide	--	C11 H9 Cl N2 O3 S	1.264	322.969	2.0614e+07	1.81407e+07	1.79294e+07	1.72755e+07	6.24897e+06	5.99767e+06	4.69026e+06	4.93466e+06	8.1042e+06	9.0279e+06	1.20222e+07	1.3313e+07	1.07143e+07	1.23567e+07	1.16788e+07	--	--	--	-	-	-	-
Com_7033_pos	--	Bisulfurous Acid	C11 H8 O2	5.431	173.06	4.7483e+06	4.85477e+06	4.23699e+06	4.93394e+06	7.01475e+06	6.98524e+06	9.1317e+06	5.12991e+06	6.73568e+06	5.68258e+06	8.14437e+06	7.91204e+06	5.56458e+06	6.63586e+06	6.51207e+06	--	--	--	-	-	-	-
Com_8807_pos	(+)-Catechin hydrate	--	C15 H14 O6	5.374	291.086	5.17395e+06	4.84674e+06	3.40221e+06	3.52972e+06	889266	4.91745e+06	4.31615e+06	4.48569e+06	3.93806e+06	4.09147e+06	6.25625e+06	6.08681e+06	4.98772e+06	5.08967e+06	4.85938e+06	--	--	--	-	-	-	-
Com_11224_pos	Ergosterol	--	C28 H44 O	9.183	397.307	2.37928e+06	1.29657e+06	1.83331e+06	1.6475e+06	3.21269e+06	2.54595e+06	902780	1.18205e+06	1.6585e+06	2.09341e+06	1.65607e+06	1.63196e+06	2.43557e+06	2.12841e+06	2.08478e+06	Steroids and steroid derivatives	57-87-4	HMDB0000878	C01694	ko01100//Metabolic pathways;ko01130//Biosynthesis of antibiotics;ko00100//Steroid biosynthesis	Global and overview maps;Lipid metabolism	Metabolism
Com_1602_pos	Coptisine chloride	--	C12 H17 N O9	1.508	320.097	2.86629e+07	2.27891e+07	5.78626e+07	4.52802e+07	8.552e+06	7.34718e+06	5.74388e+07	5.81689e+07	5.83667e+07	4.29101e+07	2.13173e+07	2.04567e+07	2.91844e+07	3.79393e+07	3.5336e+07	--	--	--	-	-	-	-
Com_48_pos	2,4-dihydroxyheptadec-16-en-1-yl acetate	--	C19 H36 O4	8.633	311.257	1.94653e+09	1.79615e+09	2.30849e+09	2.57937e+09	2.13346e+09	1.7214e+09	1.64403e+09	2.45578e+09	2.18624e+09	1.88152e+09	1.63008e+09	3.23541e+09	2.52417e+09	2.28094e+09	1.71199e+09	--	--	--	-	-	-	-
Com_6636_pos	--	DL-Panthenol	C9 H19 N O4	4.987	206.139	8.82683e+06	7.42591e+06	7.04376e+06	6.29698e+06	7.6285e+06	8.43321e+06	6.54961e+06	7.19351e+06	8.56624e+06	9.95324e+06	7.70482e+06	6.28033e+06	8.49612e+06	6.40931e+06	7.35833e+06	Fatty Acyls	81-13-0	HMDB0004231	C05944	ko00770//Pantothenate and CoA biosynthesis	Metabolism of cofactors and vitamins	Metabolism
Com_6808_pos	Indole-3-acetamide	--	C10 H10 N2 O	5.097	175.086	3.18448e+06	2.14319e+06	2.03919e+06	2.00772e+06	7.37773e+06	8.15161e+06	3.17751e+06	3.06359e+06	9.66339e+06	8.5331e+06	2.67073e+06	3.01425e+06	2.89938e+06	3.92483e+06	2.50873e+06	Indoles and derivatives	879-37-8	HMDB0029739	C02693	ko00380//Tryptophan metabolism	Amino acid metabolism	Metabolism
Com_7060_pos	PE (4:0/16:2)	--	C25 H46 N O8 P	5.861	520.31	4.69966e+06	5.06526e+06	6.16027e+06	6.8241e+06	3.31238e+06	4.30589e+06	2.70377e+06	3.06372e+06	5.38821e+06	5.73466e+06	2.45584e+06	2.3531e+06	4.61781e+06	5.61085e+06	4.14224e+06	--	--	--	-	-	-	-
Com_7059_pos	--	beta-Nicotinamide Mononucleotide	C11 H15 N2 O8 P	1.376	335.063	7.53138e+06	5.11346e+06	4.56994e+06	4.41212e+06	2.90946e+06	3.15132e+06	6.67871e+06	8.62469e+06	5.51895e+06	4.61743e+06	7.75331e+06	8.34633e+06	5.00369e+06	6.48572e+06	5.80233e+06	Pyridine nucleotides	1094-61-7	HMDB0000229	C00455	ko01100//Metabolic pathways;ko00760//Nicotinate and nicotinamide metabolism	Global and overview maps;Metabolism of cofactors and vitamins	Metabolism
Com_365_pos	Indole	--	C8 H7 N	5.087	118.065	8.24119e+07	7.17172e+07	5.35718e+07	4.81081e+07	3.20363e+08	3.06653e+08	1.03957e+08	1.01987e+08	1.09642e+08	1.14919e+08	6.16737e+07	6.21658e+07	1.26071e+08	1.18238e+08	1.29627e+08	Heteroaromatic compounds	109-97-7	HMDB0035924	C00463	ko01100//Metabolic pathways;ko01110//Biosynthesis of secondary metabolites;ko00400//Phenylalanine, tyrosine and tryptophan biosynthesis;ko00380//Tryptophan metabolism;ko00402//Benzoxazinoid biosynthesis	Amino acid metabolism;Biosynthesis of other secondary metabolites;Global and overview maps	Metabolism
Com_1985_pos	1-[2-(2,5-dimethyl-1H-pyrrol-1-yl)-4-nitrophenyl]-1H-imidazole	--	C15 H14 N4 O2	5.84	283.115	4.94548e+07	4.4071e+07	2.27e+07	1.97409e+07	2.79918e+07	1.04649e+07	4.23258e+07	3.7021e+07	5.33432e+07	5.57945e+07	4.90928e+07	5.3219e+07	3.78383e+07	3.97392e+07	4.10768e+07	--	--	--	-	-	-	-
Com_7244_pos	--	(5-L-Glutamyl)-L-amino acid	C8 H14 N2 O5	1.379	219.097	7.8389e+06	7.12448e+06	3.8096e+06	3.08073e+06	2.77383e+06	3.1674e+06	3.2541e+06	3.58518e+06	4.82927e+06	3.80542e+06	3.44786e+06	3.36575e+06	5.20216e+06	4.24977e+06	4.84418e+06	--	--	--	-	-	-	-
Com_4920_pos	Neferine	--	C38 H44 N2 O6	8.352	625.319	3.60275e+06	4.83909e+06	9.50255e+06	1.231e+07	3.30774e+06	3.38788e+06	6.55228e+06	4.8905e+06	8.5988e+06	7.80671e+06	4.39519e+06	4.04297e+06	5.51361e+06	6.49503e+06	8.03816e+06	Isoquinolines and derivatives	2292-16-2	HMDB0034104	-	-	-	-
Com_2256_pos	Sedanolide	--	C12 H18 O2	5.978	195.138	2.6834e+07	3.15929e+07	2.59409e+07	3.6075e+07	2.68969e+07	2.53301e+07	3.71848e+07	4.0742e+07	2.88978e+07	3.25844e+07	4.17931e+07	2.80488e+07	2.76566e+07	3.52251e+07	3.16883e+07	Lactones	4567-33-3	HMDB0034450	-	-	-	-
Com_16015_pos	汐-Hydroxyalprazolam	--	C17 H13 Cl N4 O	4.03	325.089	337700	279619	405129	368473	314133	507174	705160	844458	694536	610077	550711	273558	485798	614631	348421	--	--	--	-	-	-	-
Com_31_pos	PC (16:2e/2:0)	--	C26 H50 N O7 P	8.796	520.339	1.46973e+09	1.40417e+09	2.00263e+09	1.92893e+09	1.31983e+09	1.24625e+09	2.99115e+09	2.88762e+09	4.97292e+09	5.16158e+09	2.53117e+09	2.56589e+09	2.30269e+09	3.13584e+09	2.33601e+09	--	--	--	-	-	-	-
Com_6884_pos	1-[4-hydroxy-3-(3-methylbut-2-en-1-yl)phenyl]ethan-1-one	--	C13 H16 O2	7.354	205.122	2.90721e+06	2.68497e+06	1.78481e+06	1.51696e+06	8.09088e+06	8.45649e+06	9.47969e+06	8.35675e+06	1.75317e+06	1.57531e+06	4.08324e+06	4.32206e+06	4.21791e+06	4.98475e+06	4.88615e+06	--	--	--	-	-	-	-
Com_11031_pos	--	S-Adenosyl-L-homocysteine	C14 H20 N6 O5 S	5.35	385.13	3.15119e+06	2.68818e+06	425222	1.49097e+06	2.02474e+06	2.45839e+06	2.24399e+06	2.26991e+06	1.95222e+06	2.93948e+06	3.24438e+06	3.78136e+06	2.36122e+06	2.53733e+06	2.56789e+06	5'-deoxyribonucleosides	979-92-0	HMDB0000939	C00021	ko01100//Metabolic pathways;ko01230//Biosynthesis of amino acids;ko00270//Cysteine and methionine metabolism	Amino acid metabolism;Global and overview maps	Metabolism
Com_8021_pos	Baohuoside I	--	C27 H30 O10	6.006	477.232	4.42547e+06	3.83623e+06	2.67612e+06	2.36441e+06	5.54995e+06	4.83227e+06	3.21424e+06	2.78422e+06	2.43512e+06	5.2219e+06	7.44312e+06	5.52564e+06	4.25103e+06	4.45119e+06	3.53563e+06	--	--	--	-	-	-	-
Com_7928_pos	--	Erianin	C18 H22 O5	5.54	319.153	6.35994e+06	6.24499e+06	2.91262e+06	2.55498e+06	3.99374e+06	3.35385e+06	2.76761e+06	2.26707e+06	5.18301e+06	3.46176e+06	4.2863e+06	3.98996e+06	3.69451e+06	3.91548e+06	4.07253e+06	--	--	--	-	-	-	-
Com_9502_pos	--	Cucurbitacin I	C30 H42 O7	8.04	515.298	3.28798e+06	3.4809e+06	3.86391e+06	3.94956e+06	4.12593e+06	3.67485e+06	3.37229e+06	2.2728e+06	3.228e+06	3.18728e+06	3.52886e+06	3.71594e+06	3.18804e+06	3.68532e+06	3.9186e+06	--	--	--	-	-	-	-
Com_8535_pos	Racecadotril	--	C21 H23 N O4 S	4.77	386.144	2.22399e+06	5.39874e+06	3.44406e+06	3.11712e+06	5.75068e+06	4.97279e+06	4.29255e+06	2.68053e+06	4.91201e+06	5.08551e+06	5.3829e+06	4.65979e+06	4.15389e+06	4.6532e+06	5.28096e+06	--	--	--	-	-	-	-
Com_2380_pos	DGTS (3:0/3:0)	--	C16 H29 N O7	5.237	348.201	4.01324e+07	3.61097e+07	3.42273e+07	2.99425e+07	1.72326e+07	2.15766e+07	2.83177e+07	1.97851e+07	1.21112e+07	1.17413e+07	1.68512e+07	2.09354e+07	2.62499e+07	2.72328e+07	2.39327e+07	--	--	--	-	-	-	-
Com_11749_pos	Acetaminophen glucuronide	--	C14 H17 N O8	5.393	328.102	1.95556e+06	1.63967e+06	1.75436e+06	1.55124e+06	2.43943e+06	2.8771e+06	2.31681e+06	973407	2.31624e+06	3.08451e+06	2.363e+06	1.78051e+06	1.92999e+06	2.46086e+06	2.43472e+06	Organooxygen compounds	16110-10-4	HMDB0010316	-	-	-	-
Com_14619_pos	N-[4-(diethylamino)phenyl]-N'-phenylurea	--	C17 H21 N3 O	4.643	322.128	1.28662e+06	877508	566604	684804	967993	1.41335e+06	883915	779429	1.08159e+06	951368	917552	1.08181e+06	728787	932287	890481	--	--	--	-	-	-	-
Com_86_pos	16-Heptadecyne-1,2,4-triol	--	C17 H32 O3	6.921	307.226	1.5591e+09	1.36222e+09	1.59361e+09	1.51195e+09	1.33882e+09	1.31929e+09	3.79773e+08	8.36087e+08	1.34012e+09	1.33486e+09	1.26773e+09	1.10563e+09	1.29823e+09	1.27647e+09	1.26539e+09	--	--	--	-	-	-	-
Com_8047_pos	3-(3,4,5-trimethoxyphenyl)propanoic acid	--	C12 H16 O5	6.34	281.101	4.63728e+06	3.93171e+06	4.25397e+06	4.13934e+06	3.76765e+06	5.54131e+06	6.37378e+06	6.85773e+06	5.152e+06	5.11781e+06	5.55679e+06	6.25058e+06	4.08459e+06	4.55649e+06	4.7674e+06	Phenylpropanoic acids	25173-72-2	HMDB0030254	-	-	-	-
Com_7613_pos	--	Gibberellic acid	C19 H22 O6	5.573	347.148	4.66977e+06	6.72207e+06	3.76393e+06	4.77703e+06	4.04255e+06	4.46361e+06	4.76173e+06	4.7677e+06	3.38819e+06	4.36341e+06	6.17263e+06	5.77252e+06	6.35777e+06	5.17777e+06	5.02922e+06	Prenol lipids	77-06-5	HMDB0003559	C01699	ko01110//Biosynthesis of secondary metabolites;ko00904//Diterpenoid biosynthesis	Global and overview maps;Metabolism of terpenoids and polyketides	Metabolism
Com_7205_pos	2-(4,4-diphenyl-1-piperidinobuta-1,3-dienyl)phenyl acetate	--	C29 H29 N O2	5.835	406.222	7.76862e+06	7.39666e+06	2.64942e+06	3.08597e+06	3.12039e+06	877593	2.98753e+06	2.05616e+06	2.04637e+06	2.50254e+06	3.67779e+06	4.39779e+06	3.4878e+06	3.1537e+06	4.08306e+06	--	--	--	-	-	-	-
Com_2664_pos	Coenzyme Q2	--	C19 H26 O4	6.59	319.188	3.43256e+07	3.04586e+07	2.82375e+07	2.61363e+07	2.29554e+07	1.94282e+07	2.1857e+07	2.44501e+07	2.45574e+07	2.42474e+07	2.80592e+07	3.03566e+07	2.4221e+07	2.78309e+07	3.16627e+07	Prenol lipids	606-06-4	HMDB0006709	C00399	ko01100//Metabolic pathways;ko01110//Biosynthesis of secondary metabolites;ko00130//Ubiquinone and other terpenoid-quinone biosynthesis;ko00190//Oxidative phosphorylation	Energy metabolism;Global and overview maps;Metabolism of cofactors and vitamins	Metabolism
Com_6026_pos	Arachidonoyl ethanolamide phosphate	--	C22 H38 N O5 P	7.854	877.493	1.46417e+06	1.42619e+06	1.76514e+06	1.68078e+06	1.75615e+06	1.12863e+06	1.1921e+07	1.00568e+07	5.78419e+06	6.33155e+06	3.81475e+06	6.06399e+06	5.24798e+06	4.46006e+06	4.29557e+06	--	--	--	-	-	-	-
Com_9911_pos	Desoximetasone	--	C22 H29 F O4	7.534	377.208	4.3363e+06	860241	1.01012e+06	943122	2.86128e+06	846051	1.03271e+06	977528	996301	2.86367e+06	916974	930955	1.75618e+06	974210	983254	Steroids and steroid derivatives	382-67-2	HMDB0014687	-	-	-	-
Com_14002_pos	--	Nicotianamine	C12 H21 N3 O6	5.684	304.15	1.28386e+06	1.32242e+06	1.51081e+06	1.28749e+06	1.0021e+06	746450	541107	679282	553651	687632	768481	682665	940278	1.02597e+06	923039	--	--	--	-	-	-	-
Com_3529_pos	LPC 12:0	--	C20 H42 N O7 P	5.951	440.281	1.58564e+07	1.56376e+07	5.24686e+06	6.15711e+06	2.3273e+07	1.4176e+07	3.58071e+06	3.20092e+06	7.88132e+06	7.27417e+06	4.44911e+06	4.65609e+06	8.82777e+06	8.63669e+06	9.93476e+06	--	--	--	-	-	-	-
Com_13856_pos	--	2-Hydroxy-6-Aminopurine	C5 H5 N5 O	5.238	152.057	725291	721360	706863	636798	1.45578e+06	736999	948609	758238	687331	654837	2.0242e+06	1.13272e+06	606443	882702	893757	Imidazopyrimidines	3373-53-3	HMDB0000403	-	-	-	-
Com_12683_pos	N-Acetylneuraminic acid	--	C11 H19 N O9	1.38	310.112	1.66486e+06	1.47633e+06	963134	1.13378e+06	1.51224e+06	1.65968e+06	1.97226e+06	2.51613e+06	2.13324e+06	2.09485e+06	2.24968e+06	2.31505e+06	1.49023e+06	1.97944e+06	1.6179e+06	Organooxygen compounds	131-48-6	HMDB0000230	C00270	ko01100//Metabolic pathways;ko00520//Amino sugar and nucleotide sugar metabolism	Carbohydrate metabolism;Global and overview maps	Metabolism
Com_6189_pos	Arachidonic acid	--	C20 H32 O2	8.005	287.236	7.68565e+06	7.95757e+06	6.66202e+06	6.65535e+06	9.38733e+06	1.01083e+07	4.22529e+06	4.88004e+06	7.33361e+06	6.35568e+06	7.94585e+06	6.89091e+06	6.79049e+06	6.87478e+06	7.54678e+06	Fatty Acyls	506-32-1	HMDB0001043	C00219	ko01100//Metabolic pathways;ko00590//Arachidonic acid metabolism;ko01040//Biosynthesis of unsaturated fatty acids;ko00591//Linoleic acid metabolism	Global and overview maps;Lipid metabolism	Metabolism
Com_1530_pos	Cotinine	--	C10 H12 N2 O	5.089	160.075	1.96045e+07	1.82431e+07	1.18414e+07	1.09295e+07	6.45224e+07	6.87882e+07	2.26223e+07	2.26289e+07	2.30855e+07	2.45683e+07	1.30904e+07	1.34943e+07	2.51713e+07	2.44913e+07	2.40122e+07	Pyridines and derivatives	486-56-6	HMDB0001046	-	-	-	-
Com_10347_pos	--	4-Methylumbelliferyl phenylphosphonate	C16 H13 O5 P	1.117	317.057	3.34044e+06	3.01793e+06	1.99094e+06	3.30739e+06	1.85597e+06	2.09258e+06	2.25158e+06	2.53555e+06	3.18402e+06	2.61223e+06	2.36104e+06	2.53447e+06	2.9789e+06	2.32607e+06	2.4556e+06	--	--	--	-	-	-	-
Com_7933_pos	3-benzyl-4-hydroxy-5-(4-hydroxyphenyl)-2,5-dihydrofuran-2-one	--	C17 H14 O4	2.168	300.119	4.8712e+06	6.23997e+06	5.24503e+06	4.43672e+06	2.8113e+06	2.31156e+06	4.26988e+06	4.03793e+06	4.32444e+06	4.43385e+06	5.28465e+06	5.57519e+06	4.83371e+06	4.17627e+06	5.69054e+06	--	--	--	-	-	-	-
Com_9386_pos	PC (14:1e/6:0)	--	C28 H56 N O7 P	10.209	550.387	3.03083e+06	3.09358e+06	3.83192e+06	3.29341e+06	2.78873e+06	2.79304e+06	5.29332e+06	5.0381e+06	5.34968e+06	5.11082e+06	3.93239e+06	3.79772e+06	3.24008e+06	3.61992e+06	3.94807e+06	--	--	--	-	-	-	-
Com_1632_pos	(-)-Scopolamine hydrochloride	--	C17 H21 N O4	4.661	304.15	2.45058e+07	1.26042e+07	4.12585e+07	2.57815e+07	3.61434e+07	6.31435e+07	1.99773e+07	2.87561e+07	2.67162e+07	2.60822e+07	4.20986e+07	4.16332e+07	4.08409e+07	4.49542e+07	2.85414e+07	--	--	--	-	-	-	-
Com_230_pos	Vindoline	--	C25 H32 N2 O6	5.679	457.24	4.13893e+08	3.39548e+08	3.02959e+08	3.49343e+08	5.49184e+08	5.5886e+08	3.82605e+08	3.4965e+08	3.64636e+08	4.26517e+08	3.52334e+08	3.11384e+08	4.85312e+08	4.10459e+08	3.80681e+08	--	--	--	C01626	ko01110//Biosynthesis of secondary metabolites;ko00901//Indole alkaloid biosynthesis	Biosynthesis of other secondary metabolites;Global and overview maps	Metabolism
Com_10054_pos	Dehydrocorydaline	--	C22 H23 N O4	4.942	366.176	2.91645e+06	2.11111e+06	2.32708e+06	1.64194e+06	2.7371e+06	2.53494e+06	2.80496e+06	1.90997e+06	2.21973e+06	2.152e+06	4.79973e+06	3.35133e+06	2.36296e+06	2.77625e+06	2.51861e+06	--	--	--	-	-	-	-
Com_16789_pos	--	IAA-Asp	C14 H14 N2 O5	5.869	291.097	103776	102053	96681.1	84725.3	185262	178765	119901	123882	101588	91648.9	91418.3	93483	92335.9	93486.3	98035.1	--	--	--	-	-	-	-
Com_7235_pos	PC (18:3e/2:0)	--	C28 H52 N O7 P	9.128	546.355	4.00247e+06	4.74074e+06	3.37358e+06	3.82439e+06	3.823e+06	2.51658e+06	6.58349e+06	6.00075e+06	8.65574e+06	7.81879e+06	4.73304e+06	5.61015e+06	5.12103e+06	6.21117e+06	5.46936e+06	--	--	--	-	-	-	-
Com_8433_pos	Caudatin	--	C28 H42 O7	6.036	491.302	5.96748e+06	5.23221e+06	4.65443e+06	4.69893e+06	3.45214e+06	3.02955e+06	3.84254e+06	3.56075e+06	3.02828e+06	3.56322e+06	3.82588e+06	4.23576e+06	4.10811e+06	4.81296e+06	4.11937e+06	--	--	--	-	-	-	-
Com_5399_pos	11-Deoxy prostaglandin F1汐	--	C20 H36 O4	8.144	363.251	6.99047e+06	7.23159e+06	6.60286e+06	6.76417e+06	4.64762e+06	4.86294e+06	6.73945e+06	6.37291e+06	1.41386e+07	1.22005e+07	7.60304e+06	7.55937e+06	7.11847e+06	6.97602e+06	8.22779e+06	--	--	--	-	-	-	-
Com_7269_pos	Carnosine	--	C9 H14 N4 O3	1.135	227.113	5.11009e+06	7.30438e+06	4.4311e+06	6.46143e+06	5.71648e+06	6.69658e+06	5.90218e+06	7.94561e+06	6.07377e+06	8.05867e+06	7.15376e+06	7.48451e+06	6.75213e+06	7.47148e+06	5.43363e+06	Peptidomimetics	305-84-0	HMDB0000033	C00386	ko01100//Metabolic pathways;ko00410//beta-Alanine metabolism;ko00340//Histidine metabolism	Amino acid metabolism;Global and overview maps;Metabolism of other amino acids	Metabolism
Com_5963_pos	PE (2:0/16:2)	--	C23 H42 N O8 P	7.028	492.271	4.42653e+06	2.6552e+06	5.05198e+06	6.26295e+06	3.15524e+06	3.1665e+06	8.74498e+06	1.1555e+07	8.55951e+06	6.53595e+06	6.69483e+06	6.20461e+06	5.01146e+06	5.25811e+06	5.43908e+06	--	--	--	-	-	-	-
Com_5835_pos	ethyl 1-(2-cyano-3-fluorophenyl)-5-methyl-1H-pyrazole-3-carboxylate	--	C14 H12 F N3 O2	1.371	274.103	6.27645e+06	6.95461e+06	5.18009e+06	7.59328e+06	3.35322e+06	3.28305e+06	4.87353e+06	7.92154e+06	1.24882e+07	9.98993e+06	4.98015e+06	4.89298e+06	6.5447e+06	4.79237e+06	6.52721e+06	--	--	--	-	-	-	-
Com_869_pos	N-Acetyl-L-aspartic acid	--	C6 H9 N O5	1.12	176.058	9.20397e+07	8.29522e+07	1.11489e+08	7.05272e+07	8.33061e+07	9.68324e+07	1.19198e+08	8.27215e+07	9.06897e+07	1.45152e+08	1.32339e+08	1.3071e+08	1.14548e+08	1.16603e+08	8.99629e+07	Carboxylic acids and derivatives	997-55-7	HMDB0000812	C01042	ko01100//Metabolic pathways;ko00250//Alanine, aspartate and glutamate metabolism	Amino acid metabolism;Global and overview maps	Metabolism
Com_7963_pos	WLH	--	C23 H30 N6 O4	7.071	473.251	2.36804e+06	1.7568e+06	1.97312e+06	2.31392e+06	1.44926e+06	1.32414e+06	7.32438e+06	6.5878e+06	921498	2.00602e+06	2.77038e+06	1.78733e+06	2.34552e+06	2.91797e+06	3.28786e+06	--	--	--	-	-	-	-
Com_1771_pos	6-Pentyl-2H-pyran-2-one	--	C10 H14 O2	5.943	167.106	5.88061e+07	1.54481e+07	5.20283e+07	4.6756e+07	4.06844e+07	4.10016e+07	4.86542e+07	3.88089e+07	4.33293e+07	4.42078e+07	4.15063e+07	4.34696e+07	4.46113e+07	4.68283e+07	4.51427e+07	Pyrans	27593-23-3	HMDB0031085	-	-	-	-
Com_8130_pos	--	Androsin	C15 H20 O8	5.684	329.122	590228	621657	1.59629e+06	797473	2.75578e+06	3.35694e+06	1.56491e+06	1.76067e+06	697159	633272	5.81363e+06	7.10691e+06	2.50349e+06	2.8462e+06	2.45752e+06	--	--	--	-	-	-	-
Com_1321_pos	N-Isovalerylglycine	--	C7 H13 N O3	1.357	160.097	6.46429e+07	5.85716e+07	7.35032e+07	6.57069e+07	5.05833e+07	5.2348e+07	7.02194e+07	5.93391e+07	7.49682e+07	7.44457e+07	7.55702e+07	6.92675e+07	6.33791e+07	6.3444e+07	7.05215e+07	--	--	--	-	-	-	-
Com_2128_pos	Methyl 4-hydroxy-3-methoxycinnamate	--	C11 H12 O4	5.26	209.081	2.61688e+07	2.63816e+07	2.91883e+07	3.50601e+07	4.09599e+07	4.35852e+07	5.05864e+07	3.80764e+07	3.40716e+07	3.58105e+07	4.60266e+07	3.62843e+07	3.04231e+07	4.06632e+07	4.84726e+07	--	--	--	-	-	-	-
Com_7872_pos	Ingenol-5,20-acetonide-3-O-angelate	--	C28 H38 O6	7.439	471.271	5.19954e+06	6.05112e+06	5.20982e+06	5.45468e+06	3.73736e+06	3.4531e+06	4.74056e+06	4.72484e+06	5.53537e+06	6.30215e+06	7.7207e+06	5.80228e+06	4.72556e+06	3.96968e+06	5.46721e+06	--	--	--	-	-	-	-
Com_2938_pos	Sarsasapogenin	--	C27 H44 O3	7.9	417.335	1.35267e+07	1.09637e+07	2.55188e+07	2.52115e+07	2.78901e+06	6.65947e+06	1.82407e+07	1.18645e+07	1.82064e+07	1.5353e+07	8.9818e+06	1.00677e+07	1.56031e+07	1.27747e+07	1.42633e+07	Steroids and steroid derivatives	126-19-2	HMDB0030024	-	-	-	-
Com_4438_pos	WLK	--	C23 H35 N5 O4	5.578	468.26	7.97905e+06	8.37259e+06	9.53069e+06	9.5875e+06	1.30451e+07	1.16422e+07	1.25646e+07	1.27423e+07	1.35338e+07	6.0352e+06	1.77523e+07	1.92586e+07	1.65344e+07	1.42377e+07	1.41312e+07	--	--	--	-	-	-	-
Com_2965_pos	ACar 14:3	--	C21 H36 N O4	7.951	366.271	2.27566e+07	2.78416e+07	1.63269e+07	1.61689e+07	9.37808e+06	8.45413e+06	8.69151e+06	8.45729e+06	1.07875e+07	1.17913e+07	1.10983e+07	5.8259e+06	1.54941e+07	1.36364e+07	1.48592e+07	--	--	--	-	-	-	-
Com_12532_pos	Naftopidil	--	C24 H28 N2 O3	8.21	393.211	1.75939e+06	1.64727e+06	1.8718e+06	2.06464e+06	995959	656319	1.71412e+06	1.28176e+06	1.50924e+06	1.79705e+06	1.56988e+06	2.19146e+06	1.40035e+06	1.53542e+06	1.36888e+06	--	--	--	-	-	-	-
Com_3338_pos	PE (4:0/6:0)	--	C15 H30 N O8 P	5.58	384.183	4.2828e+06	3.05693e+06	2.23711e+07	1.56598e+07	3.72231e+06	4.30543e+06	4.26823e+06	936988	5.72613e+06	5.70313e+06	5.28991e+06	5.12331e+06	4.80853e+06	8.07421e+06	5.46478e+06	--	--	--	-	-	-	-
Com_8767_pos	Cer-NS (d19:2/22:2)	--	C41 H75 N O3	11.019	630.579	209352	188904	236889	4.61253e+06	219099	234115	283945	300435	242426	232734	249856	242592	284479	249341	235688	--	--	--	-	-	-	-
Com_2040_pos	trans-Cinnamaldehyde	--	C9 H8 O	5.394	151.075	2.73251e+07	3.06947e+07	2.92746e+07	4.14245e+07	2.96833e+07	4.15485e+07	3.84695e+07	3.03737e+07	4.0441e+07	4.12077e+07	4.58572e+07	4.62509e+07	3.53482e+07	4.02179e+07	4.13524e+07	Cinnamaldehydes	57194-69-1	HMDB0032072	C00903	ko01100//Metabolic pathways;ko01110//Biosynthesis of secondary metabolites;ko00940//Phenylpropanoid biosynthesis	Biosynthesis of other secondary metabolites;Global and overview maps	Metabolism
Com_8480_pos	Praeruptorin A	--	C21 H22 O7	1.376	404.177	4.55648e+06	3.88268e+06	3.13074e+06	3.29307e+06	4.44995e+06	4.31932e+06	4.52867e+06	4.66534e+06	5.44857e+06	5.57646e+06	6.72504e+06	5.98108e+06	4.62041e+06	5.38197e+06	4.98602e+06	--	--	--	-	-	-	-
Com_4032_pos	--	DL-Methionine	C5 H11 N O2 S	2.001	150.058	1.57373e+07	1.50155e+07	1.16108e+07	1.01535e+07	3.65708e+06	3.31441e+06	9.72933e+06	8.18059e+06	2.17477e+07	2.01869e+07	5.41922e+06	5.92578e+06	8.9025e+06	1.04194e+07	9.40519e+06	Carboxylic acids and derivatives	59-51-8	HMDB0033951	-	-	-	-
Com_7449_pos	--	olivil	C20 H24 O7	5.368	377.158	5.92005e+06	5.78934e+06	6.57878e+06	5.57278e+06	6.34089e+06	6.61006e+06	4.30873e+06	3.36278e+06	5.3389e+06	5.79458e+06	6.02777e+06	5.68911e+06	5.94967e+06	5.70134e+06	6.73311e+06	--	--	--	-	-	-	-
Com_1706_pos	(5缶,9缶,16缶)-17-Hydroxykauran-19-oic acid	--	C20 H32 O3	7.2	338.268	5.29579e+07	4.50266e+07	3.11993e+07	2.79482e+07	5.77443e+07	6.0082e+07	5.60338e+07	5.17856e+07	3.85201e+07	3.69478e+07	6.25976e+07	6.40538e+07	4.24087e+07	4.94696e+07	4.3585e+07	--	--	--	-	-	-	-
Com_325_pos	(11E,15Z)-9,10,13-trihydroxyoctadeca-11,15-dienoic acid	--	C18 H32 O5	6.766	329.232	3.43418e+08	3.42012e+08	2.9834e+08	2.9182e+08	1.67206e+08	1.74854e+08	2.24142e+08	2.19589e+08	2.22827e+08	2.25382e+08	2.28138e+08	2.34309e+08	2.51447e+08	2.56295e+08	2.59497e+08	--	--	--	-	-	-	-
Com_5786_pos	--	2-Phenylphenol	C12 H10 O	5.449	171.08	6.37673e+06	7.48171e+06	6.65334e+06	7.0446e+06	1.1375e+07	9.43888e+06	5.9965e+06	6.35685e+06	7.73134e+06	6.59091e+06	9.53883e+06	9.04624e+06	7.94108e+06	7.69115e+06	8.20276e+06	Benzene and substituted derivatives	90-43-7	HMDB0032582	-	-	-	-
Com_12441_pos	Xanthinol	--	C13 H21 N5 O4	4.736	312.165	1.39773e+06	1.64683e+06	978324	958516	2.06164e+06	2.48274e+06	1.14649e+06	1.3537e+06	1.67551e+06	1.59943e+06	2.03186e+06	2.12406e+06	1.44416e+06	1.63253e+06	1.45272e+06	--	--	--	-	-	-	-
Com_615_pos	Pyroglutamic acid	--	C5 H7 N O3	1.309	130.05	1.08698e+08	1.61504e+08	1.0716e+08	9.37899e+07	1.57232e+08	1.75052e+08	1.28707e+08	1.68698e+08	1.82446e+08	2.0469e+08	1.89499e+08	1.06879e+08	1.2846e+08	1.6585e+08	1.83011e+08	Carboxylic acids and derivatives	-	HMDB0060262	C01879	ko01100//Metabolic pathways;ko00480//Glutathione metabolism	Global and overview maps;Metabolism of other amino acids	Metabolism
Com_4076_pos	N1-isopropyl-2-(1H-2-pyrrolylcarbonyl)-1-hydrazinecarboxamide	--	C9 H14 N4 O2	5.876	255.083	1.35206e+07	1.26518e+07	1.53184e+07	1.43526e+07	1.13164e+07	1.03483e+07	1.91551e+07	1.76404e+07	2.11182e+07	2.10808e+07	1.60839e+07	1.57402e+07	1.49448e+07	1.39162e+07	1.55132e+07	--	--	--	-	-	-	-
Com_8225_pos	8-Isoprostaglandin F1汐	--	C20 H36 O5	8.044	339.253	2.77689e+06	4.15026e+06	1.66263e+06	2.37885e+06	1.33947e+06	1.2138e+06	2.22305e+06	1.68412e+06	6.89241e+06	1.45016e+06	2.00353e+06	2.9652e+06	2.36322e+06	2.77833e+06	2.36161e+06	--	--	--	-	-	-	-
Com_4270_pos	(2E)-3-(3,4-dimethoxyphenyl)prop-2-enoic acid	--	C11 H12 O4	5.261	191.07	1.2014e+07	1.20103e+07	1.1043e+07	1.00762e+07	1.80788e+07	1.60016e+07	1.48632e+07	1.0237e+07	9.92962e+06	1.0987e+07	1.94034e+07	1.03095e+07	1.11918e+07	1.18665e+07	1.3766e+07	--	--	--	-	-	-	-
Com_3175_pos	Taurodeoxycholic Acid	--	C26 H45 N O6 S	5.769	522.29	1.77595e+07	2.55143e+07	1.32627e+07	1.33592e+07	1.64199e+07	1.10804e+07	9.3059e+06	1.1769e+07	9.07863e+06	9.18036e+06	1.21246e+07	1.54769e+07	2.26755e+07	1.64876e+07	1.70468e+07	Steroids and steroid derivatives	516-50-7	HMDB0000896	-	-	-	-
Com_12569_pos	--	N-Sinapoylputrescine	C15 H22 N2 O4	5.53	295.165	1.812e+06	2.29985e+06	2.00286e+06	1.73626e+06	2.15995e+06	2.05992e+06	1.61321e+06	1.96265e+06	1.25297e+06	1.29452e+06	1.70975e+06	2.18297e+06	1.95024e+06	2.03376e+06	1.88992e+06	--	--	--	-	-	-	-
Com_14532_pos	Astilbin	--	C21 H22 O11	4.709	451.123	156359	138750	128471	119073	136070	143416	1.63528e+06	1.22305e+06	144090	155213	156800	151790	236729	284156	282867	Flavonoids	29838-67-3	HMDB0033850	-	-	-	-
Com_14756_pos	Retinoic acid	--	C20 H28 O2	8.845	301.213	753998	534006	1.20225e+06	792967	563840	493771	631884	559504	579022	518981	430740	281034	644962	495738	301995	Prenol lipids	4759-48-2	HMDB0006219	C00777	ko01100//Metabolic pathways	Global and overview maps	Metabolism
Com_9387_pos	Ingenol-3,4-5,20-diacetonide	--	C26 H36 O5	6.045	204.146	3.9695e+06	3.73405e+06	3.85737e+06	4.04709e+06	1.75933e+06	2.96132e+06	2.08022e+06	3.06115e+06	2.48751e+06	2.73384e+06	2.47927e+06	3.03499e+06	3.18313e+06	3.00493e+06	2.59243e+06	--	--	--	-	-	-	-
Com_12707_pos	Pinoresinol dimethyl ether	--	C22 H26 O6	4.995	387.185	1.18414e+06	898872	1.0121e+06	1.17903e+06	2.34037e+06	2.28753e+06	1.82009e+06	1.44397e+06	1.91669e+06	1.43411e+06	2.26675e+06	2.08055e+06	1.37959e+06	1.89642e+06	1.54866e+06	--	--	--	-	-	-	-
Com_77_pos	Bicyclo prostaglandin E2	--	C20 H30 O4	7.898	335.218	1.3094e+09	1.30087e+09	1.74334e+09	1.63457e+09	7.57398e+08	7.85878e+08	1.97987e+09	1.86764e+09	1.78185e+09	1.72625e+09	1.38124e+09	1.46586e+09	1.47297e+09	1.502e+09	1.56422e+09	--	--	--	-	-	-	-
Com_2167_pos	4-(1-adamantyl)-2-methyl-1,3-thiazole	--	C14 H19 N S	5.247	234.134	4.50427e+07	4.00446e+07	3.55e+07	2.98886e+07	3.1278e+07	3.17927e+07	5.07776e+07	3.59664e+07	3.0318e+07	2.90999e+07	4.5988e+07	4.14552e+07	3.64857e+07	3.54197e+07	3.71919e+07	--	--	--	-	-	-	-
Com_11583_pos	O-7460	--	C25 H48 F O5 P	10.714	501.315	2.16101e+06	2.07491e+06	1.362e+06	1.56051e+06	2.98251e+06	2.9837e+06	1.48723e+06	1.18088e+06	888021	920786	1.13922e+06	668465	1.72091e+06	1.98778e+06	1.57337e+06	--	--	--	-	-	-	-
Com_990_pos	Monolaurin	--	C15 H30 O4	7.273	313.177	7.37735e+07	7.00691e+07	7.52476e+07	6.73146e+07	1.12019e+08	1.14832e+08	5.77431e+07	5.28648e+07	5.83941e+07	6.08495e+07	9.21258e+07	9.2293e+07	7.85647e+07	8.25023e+07	8.08879e+07	--	--	--	-	-	-	-
Com_4458_pos	4-(2-chloro-6-fluorophenyl)-1,3-thiazol-2-amine	--	C9 H6 Cl F N2 S	1.119	229.001	1.05827e+07	7.37128e+06	8.52736e+06	9.34566e+06	1.62491e+07	1.68764e+07	1.55511e+07	1.37305e+07	1.07109e+07	7.49809e+06	1.66971e+07	1.55522e+07	1.08916e+07	1.30677e+07	1.31573e+07	--	--	--	-	-	-	-
Com_222_pos	Enalaprilat	--	C18 H24 N2 O5	6.883	349.177	5.56815e+08	5.56219e+08	4.80468e+08	3.69622e+08	5.11373e+08	5.78164e+08	3.48462e+08	4.13249e+08	5.16953e+08	5.22887e+08	4.07014e+08	3.921e+08	4.45583e+08	4.60198e+08	4.78611e+08	Carboxylic acids and derivatives	76420-72-9	HMDB0041886	-	-	-	-
Com_4120_pos	Blinin	--	C22 H32 O6	5.495	410.253	1.31908e+07	1.36656e+07	9.29973e+06	1.01031e+07	1.88688e+07	1.87869e+07	2.11493e+07	1.90107e+07	8.70371e+06	8.94867e+06	1.71389e+07	1.35431e+07	1.43034e+07	1.37761e+07	1.4021e+07	--	--	--	-	-	-	-
Com_2025_pos	4-methoxyphenyl 3,5-dimethyl-1-phenyl-1H-pyrazole-4-carboxylate	--	C19 H18 N2 O3	5.417	345.115	3.29005e+07	2.84129e+07	1.57855e+07	2.56956e+07	4.93046e+07	4.59657e+07	3.99674e+07	4.24125e+07	4.05527e+07	4.43906e+07	4.0246e+07	4.17064e+07	3.90737e+07	3.62734e+07	4.05991e+07	--	--	--	-	-	-	-
Com_4524_pos	--	TriacetonaMine	C9 H17 N O	9.404	156.138	9.9243e+06	6.91384e+06	1.04372e+07	1.00023e+07	1.65689e+07	1.28012e+07	1.79106e+07	1.69025e+07	1.15794e+07	1.17428e+07	7.36182e+06	1.32248e+07	1.42454e+07	1.13376e+07	1.2813e+07	Piperidines	826-36-8	HMDB0031179	-	-	-	-
Com_2001_pos	--	Neotuberostemonine	C22 H33 N O4	8.328	376.246	5.08671e+07	4.74515e+07	3.28736e+06	2.82951e+06	1.34774e+07	1.36944e+07	1.0285e+06	1.04175e+06	7.04419e+06	7.43041e+06	1.57084e+06	1.98758e+06	1.15327e+07	1.27819e+07	1.37064e+07	--	--	--	-	-	-	-
Com_2519_pos	--	Sebacic acid	C10 H18 O4	7.512	203.127	2.38277e+07	2.39736e+07	2.38602e+07	3.09103e+07	1.51053e+07	1.53008e+07	1.86416e+07	1.20274e+07	2.52268e+07	2.33254e+07	1.95309e+07	1.89595e+07	2.06349e+07	2.09869e+07	2.25196e+07	Fatty Acyls	111-20-6	HMDB0000792	-	-	-	-
Com_597_pos	Psychosine	--	C24 H47 N O7	5.56	462.342	9.82074e+07	9.9161e+07	1.50446e+08	1.61085e+08	4.74031e+07	4.46109e+07	5.4604e+07	5.05921e+07	8.42688e+07	8.20443e+07	5.58965e+07	5.70576e+07	8.41117e+07	8.67134e+07	8.5869e+07	-	2238-90-6	HMDB0000648	C01747	ko00600//Sphingolipid metabolism	Lipid metabolism	Metabolism
Com_2999_pos	FKK	--	C21 H35 N5 O4	5.284	404.264	1.81444e+07	2.7502e+07	1.27691e+07	1.51429e+07	2.49461e+07	2.19838e+07	8.74599e+06	8.48067e+06	8.72575e+06	9.55811e+06	1.04193e+07	7.90853e+06	1.33156e+07	1.49488e+07	1.65289e+07	--	--	--	-	-	-	-
Com_3827_pos	1-O-(3,4,5-Trimethoxybenzoyl)-beta-L-galactopyranose	--	C16 H22 O10	5.457	357.115	2.03041e+07	1.98027e+07	1.83535e+07	1.75661e+07	1.48903e+07	1.45617e+07	2.03098e+07	1.57923e+07	1.91958e+07	2.09872e+07	1.59598e+07	1.66942e+07	1.76316e+07	1.61496e+07	1.70628e+07	--	--	--	-	-	-	-
Com_9907_pos	Oroxylin A	--	C16 H12 O5	1.112	285.081	3.3213e+06	2.25247e+06	2.62171e+06	3.62166e+06	3.19318e+06	3.1206e+06	3.62554e+06	2.45989e+06	3.44702e+06	4.39248e+06	3.73359e+06	3.37098e+06	4.00638e+06	3.26134e+06	3.92236e+06	--	--	--	-	-	-	-
Com_2123_pos	5-(2,5-dihydroxyhexyl)oxolan-2-one	--	C10 H18 O4	5.607	185.117	2.90834e+07	3.96223e+07	4.15361e+07	3.43286e+07	3.10699e+07	2.5481e+07	2.77229e+07	2.59215e+07	4.04093e+07	4.91111e+07	2.96055e+07	2.82429e+07	3.45723e+07	3.55301e+07	2.80964e+07	--	--	--	-	-	-	-
Com_10573_pos	Resibufogenin	--	C24 H32 O4	7.402	182.13	2.20348e+06	1.90362e+06	2.16628e+06	1.80813e+06	2.91918e+06	3.70117e+06	3.15655e+06	2.53482e+06	2.87766e+06	2.71381e+06	2.67097e+06	2.56306e+06	2.23839e+06	3.09034e+06	2.45951e+06	--	--	--	-	-	-	-
Com_657_pos	3-hydroxy-2-octylpentanedioic acid	--	C13 H24 O5	6.241	243.159	1.69888e+08	1.67204e+08	1.07602e+08	1.05154e+08	9.83331e+07	9.00724e+07	1.28792e+08	1.25942e+08	1.04046e+08	1.04182e+08	1.737e+08	1.63908e+08	1.30249e+08	1.35982e+08	1.33855e+08	--	--	--	-	-	-	-
Com_1207_pos	(-)-Caryophyllene oxide	--	C15 H24 O	5.767	221.19	9.31143e+07	7.169e+07	5.81071e+07	5.18461e+07	5.64903e+07	6.58406e+07	5.27551e+07	3.77699e+07	4.44891e+07	3.66639e+07	5.8271e+07	5.11057e+07	5.17271e+07	5.76861e+07	5.27389e+07	--	--	--	-	-	-	-
Com_4236_pos	Epmedin B	--	C38 H48 O19	6.32	827.309	3.93773e+06	3.36046e+06	4.55476e+06	3.3155e+06	1.67482e+07	1.81816e+07	9.85406e+06	7.21833e+06	2.78663e+06	4.91059e+06	1.48637e+07	1.40868e+07	9.93951e+06	8.42314e+06	1.06361e+07	--	--	--	-	-	-	-
Com_3348_pos	HPK	--	C17 H28 N6 O4	7.957	359.242	6.76044e+06	6.39547e+06	6.07022e+06	4.74478e+06	4.82163e+06	5.2202e+06	2.80911e+07	2.4034e+07	4.23148e+06	4.69822e+06	5.11102e+06	4.28393e+06	8.41808e+06	7.14251e+06	8.28493e+06	--	--	--	-	-	-	-
Com_11938_pos	Atomexetine	--	C17 H21 N O	4.687	256.165	1.93036e+06	2.63449e+06	1.01229e+06	908547	1.9825e+06	1.93426e+06	1.52493e+06	1.27329e+06	1.79321e+06	1.50956e+06	1.93912e+06	1.85869e+06	1.87756e+06	1.57499e+06	2.10025e+06	--	--	--	-	-	-	-
Com_10618_pos	Lovastatin	--	C24 H36 O5	6.178	405.262	1.56868e+06	3.48992e+06	1.91935e+06	1.46708e+06	1.79604e+06	2.53859e+06	854596	1.07901e+06	3.15551e+06	2.34122e+06	1.87392e+06	962592	2.33758e+06	3.74079e+06	1.97087e+06	Lactones	75330-75-5	HMDB0014372	-	-	-	-
Com_7898_pos	N-(p-Coumaroyl) serotonin	--	C19 H18 N2 O3	5.769	645.272	6.71524e+06	3.62998e+06	4.20468e+06	3.50491e+06	3.76627e+06	4.35241e+06	7.15413e+06	5.7652e+06	5.88066e+06	3.81191e+06	2.65835e+06	3.15568e+06	4.82487e+06	4.67556e+06	4.40079e+06	--	--	--	-	-	-	-
Com_3158_pos	4-Deacetylneosolaniol	--	C17 H24 O7	7.328	358.186	1.93163e+07	1.99472e+07	2.4167e+07	1.76004e+07	1.06471e+07	1.02813e+07	1.49597e+07	1.42026e+07	1.94096e+07	1.86274e+07	1.44558e+07	1.43938e+07	1.763e+07	1.56474e+07	1.84599e+07	Prenol lipids	74833-39-9	HMDB0036158	-	-	-	-
Com_14999_pos	--	(-)-epigallocatechin	C15 H14 O7	2.398	307.08	649842	631777	132591	300056	271062	218170	731769	625933	226817	259406	1.44763e+06	1.15744e+06	685083	854271	730077	--	--	--	-	-	-	-
Com_12384_pos	--	Acetylharpagide	C17 H26 O11	5.151	407.156	2.42628e+06	1.69591e+06	1.50374e+06	804336	874600	1.1708e+06	719794	1.03637e+06	2.82199e+06	1.86156e+06	1.72757e+06	1.53051e+06	1.33101e+06	2.20337e+06	1.78492e+06	--	--	--	-	-	-	-
Com_7730_pos	Taldalafil	--	C22 H19 N3 O4	5.45	187.06	5.5445e+06	5.01262e+06	5.60692e+06	4.7645e+06	4.86507e+06	3.20877e+06	6.12727e+06	4.09905e+06	6.40261e+06	6.02096e+06	5.87154e+06	5.67341e+06	4.96487e+06	5.15153e+06	7.21361e+06	--	--	--	-	-	-	-
Com_9903_pos	14-Deoxyandrographolide	--	C20 H30 O4	5.063	335.225	3.79365e+06	3.65497e+06	3.73548e+06	3.62446e+06	3.57788e+06	3.66476e+06	3.66145e+06	3.28501e+06	4.59425e+06	4.67324e+06	3.28734e+06	4.1633e+06	3.91807e+06	3.93899e+06	3.6431e+06	--	--	--	-	-	-	-
Com_2024_pos	Prolylleucine	--	C11 H20 N2 O3	1.386	229.154	3.20535e+07	3.1569e+07	3.24961e+07	2.9041e+07	2.28045e+07	2.03805e+07	5.53638e+07	4.64549e+07	3.80359e+07	4.70811e+07	4.26359e+07	4.32801e+07	4.38727e+07	3.61554e+07	3.32605e+07	--	--	--	-	-	-	-
Com_5403_pos	5-fluoro AKB48 N-(4-hydroxypentyl) metabolite	--	C23 H30 F N3 O2	5.698	438.188	1.28138e+07	1.19035e+07	8.30825e+06	9.20712e+06	3.72495e+06	5.00572e+06	4.25135e+06	4.68376e+06	1.01843e+07	1.17705e+07	2.94934e+06	2.50963e+06	7.71953e+06	7.73953e+06	7.50645e+06	--	--	--	-	-	-	-
Com_7860_pos	Harmaline	--	C13 H14 N2 O	5.079	215.121	6.754e+06	6.35261e+06	4.05442e+06	4.06488e+06	2.33632e+06	2.44464e+06	2.81258e+06	2.54899e+06	2.68972e+06	3.07457e+06	2.35498e+06	1.96483e+06	3.30056e+06	3.52049e+06	3.45894e+06	Harmala alkaloids	304-21-2	HMDB0030310	-	-	-	-
Com_10859_pos	Ginkgolic Acid C15:1	--	C22 H34 O3	5.598	347.262	2.6686e+06	2.30164e+06	2.98054e+06	2.9499e+06	1.91552e+06	3.25853e+06	2.95872e+06	2.3675e+06	2.74683e+06	2.5992e+06	2.69662e+06	3.06636e+06	3.04705e+06	3.23447e+06	3.00826e+06	--	--	--	-	-	-	-
Com_6830_pos	SM (d15:3/13:1)	--	C33 H61 N2 O6 P	10.484	613.443	2.67623e+06	3.14656e+06	7.37292e+06	7.27272e+06	2.2645e+06	2.1141e+06	9.05399e+06	6.8452e+06	2.22545e+06	1.6864e+06	1.21401e+06	1.40911e+06	4.19137e+06	4.61423e+06	4.20203e+06	--	--	--	-	-	-	-
Com_1337_pos	Stiripentol	--	C14 H18 O3	5.486	217.122	3.78769e+07	4.18072e+07	5.15916e+07	5.44796e+07	8.06856e+07	7.42395e+07	6.52465e+07	5.4091e+07	6.81786e+07	6.64402e+07	8.89262e+07	9.02284e+07	6.6277e+07	6.44492e+07	6.82476e+07	--	--	--	-	-	-	-
Com_2153_pos	Reynoutrin	--	C20 H18 O11	5.294	413.106	8.29899e+06	9.26761e+06	3.52648e+07	3.85544e+07	6.22463e+06	7.87456e+06	1.85508e+07	1.70773e+07	2.28042e+07	2.24036e+07	1.23025e+07	1.31885e+07	1.93958e+07	1.74688e+07	1.67463e+07	--	--	--	-	-	-	-
Com_11548_pos	Sitagliptin	--	C16 H15 F6 N5 O	4.897	408.128	3.06344e+06	2.61608e+06	1.74148e+06	1.5629e+06	2.27107e+06	2.08102e+06	2.00116e+06	2.08583e+06	2.42367e+06	2.20731e+06	2.87866e+06	2.31079e+06	2.17767e+06	2.03469e+06	2.06826e+06	Carboxylic acids and derivatives	486460-32-6	HMDB0015390	-	-	-	-
Com_3551_pos	4-(benzoylamino)-3-hydroxybutanoic acid	--	C11 H13 N O4	5.272	206.081	1.53176e+07	1.28528e+07	1.85625e+07	1.95444e+07	2.18818e+07	2.05745e+07	1.75122e+07	1.57674e+07	2.02905e+07	2.01377e+07	1.86507e+07	1.76596e+07	1.64094e+07	1.89565e+07	2.09791e+07	--	--	--	-	-	-	-
Com_12331_pos	--	5-O-p-Coumaroyl shikimic acid	C16 H16 O7	5.903	321.096	1.39008e+06	1.87973e+06	2.27817e+06	1.71451e+06	1.34369e+06	1.58793e+06	1.39315e+06	1.90216e+06	2.04134e+06	1.67192e+06	1.97532e+06	1.58642e+06	1.92977e+06	1.80688e+06	2.01039e+06	--	--	--	-	-	-	-
Com_2360_pos	Monocrotaline	--	C16 H23 N O6	5.4	326.16	9.68681e+06	8.66041e+06	4.23311e+06	7.08902e+06	3.68545e+07	3.96426e+07	1.15612e+07	1.30666e+07	7.62798e+06	9.63644e+06	9.4819e+06	1.26109e+07	1.6881e+07	1.64861e+07	1.64751e+07	Pyrrolizines	315-22-0	HMDB0034363	-	-	-	-
Com_5919_pos	--	Indole-3-carboxylic acid	C9 H7 N O2	5.088	162.055	4.6501e+06	3.4299e+06	3.32698e+06	3.81312e+06	1.09186e+07	1.00614e+07	5.09068e+06	4.95967e+06	5.7486e+06	5.95162e+06	5.96295e+06	5.08122e+06	6.04132e+06	6.21754e+06	6.77518e+06	Indoles and derivatives	771-50-6	HMDB0003320	-	-	-	-
Com_253_pos	Stearamide	--	C18 H37 N O	10.578	284.294	7.76056e+07	6.82286e+07	4.32842e+08	3.52909e+08	3.55417e+08	2.89169e+08	4.20124e+08	5.02775e+08	1.58467e+08	2.16475e+08	1.3225e+08	1.14932e+08	4.53075e+08	4.21548e+08	4.40394e+08	Fatty Acyls	124-26-5	HMDB0034146	-	-	-	-
Com_11366_pos	--	Cucurbitacin B	C32 H46 O8	6.592	559.325	1.51405e+06	2.07104e+06	1.71865e+06	867224	1.52664e+06	1.4606e+06	1.49461e+06	2.35221e+06	3.27854e+06	3.43362e+06	3.11424e+06	3.50665e+06	2.02659e+06	2.35398e+06	2.22367e+06	Steroids and steroid derivatives	6199-67-3	HMDB0034927	-	-	-	-
Com_5188_pos	Ocfentanil-d5	--	C22 H22 [2]H5 F N2 O2	5.876	376.246	1.27667e+07	1.20691e+07	1.20634e+07	1.04499e+07	3.00777e+06	1.25377e+07	8.19834e+06	7.75505e+06	8.46307e+06	9.28257e+06	1.24931e+07	1.29199e+07	1.14911e+07	9.74014e+06	1.13154e+07	--	--	--	-	-	-	-
Com_4352_pos	PC (18:2e/18:0)	--	C44 H86 N O7 P	10.524	772.62	1.22912e+06	1.24347e+06	2.08815e+06	1.49394e+07	2.54895e+06	2.85695e+06	2.61334e+06	2.77038e+06	2.04999e+06	1.96901e+06	1.97865e+06	2.25933e+06	2.42812e+06	2.31806e+06	2.17691e+06	--	--	--	-	-	-	-
Com_3840_pos	--	lupinine	C10 H19 N O	9.4	170.154	1.2187e+07	9.88377e+06	1.45054e+07	1.43416e+07	1.84151e+07	1.76859e+07	2.32829e+07	1.95602e+07	1.66372e+07	1.1557e+07	1.64706e+07	1.28197e+07	1.32296e+07	1.26739e+07	1.862e+07	--	--	--	C10773	ko01110//Biosynthesis of secondary metabolites;ko00960//Tropane, piperidine and pyridine alkaloid biosynthesis	Biosynthesis of other secondary metabolites;Global and overview maps	Metabolism
Com_745_pos	Tropine	--	C8 H15 N O	1.373	142.123	1.10991e+08	1.10815e+08	1.40328e+08	9.66901e+07	1.02052e+08	9.23087e+07	1.19214e+08	1.08556e+08	1.07535e+08	1.15237e+08	8.61376e+07	8.26036e+07	1.02187e+08	1.04156e+08	1.05224e+08	--	--	--	C00729	ko01100//Metabolic pathways;ko01110//Biosynthesis of secondary metabolites;ko00960//Tropane, piperidine and pyridine alkaloid biosynthesis	Biosynthesis of other secondary metabolites;Global and overview maps	Metabolism
Com_3093_pos	3-hydroxy-N-(1-hydroxy-4-methylpentan-2-yl)-5-oxo-6-phenylhexanamide	--	C18 H27 N O4	5.592	322.201	2.80426e+07	2.64265e+07	2.03537e+07	2.13247e+07	7.8235e+06	8.37056e+06	1.88015e+07	1.62553e+07	1.79231e+07	2.10328e+07	5.53654e+06	7.40759e+06	1.67003e+07	1.74576e+07	1.64525e+07	--	--	--	-	-	-	-
Com_2900_pos	(2汕,3汕,9缶,17缶,22R)-2,3,14,20,22-Pentahydroxyergost-7-en-6-one	--	C28 H46 O6	10.723	479.334	1.88055e+07	1.75462e+07	1.49093e+07	1.39974e+07	3.03092e+07	2.79815e+07	1.39965e+07	1.20877e+07	1.09425e+07	1.02548e+07	1.48723e+07	1.3878e+07	1.78177e+07	1.71723e+07	1.74616e+07	--	--	--	-	-	-	-
Com_7431_pos	--	tZROG	C21 H31 N5 O10	5.604	496.205	4.18796e+06	4.40499e+06	4.01409e+06	4.32012e+06	6.67063e+06	6.93833e+06	6.71659e+06	5.54664e+06	4.58087e+06	5.52839e+06	8.55517e+06	8.28322e+06	6.48892e+06	6.51627e+06	4.56063e+06	--	--	--	-	-	-	-
Com_1270_pos	YKK	--	C21 H35 N5 O5	6.246	438.263	3.9033e+07	3.66751e+07	2.62483e+07	1.40049e+07	8.60097e+07	6.18661e+07	2.78113e+07	1.98972e+07	5.29487e+07	4.15134e+07	2.48378e+07	2.45291e+07	3.63883e+07	4.13544e+07	4.06666e+07	--	--	--	-	-	-	-
Com_2614_pos	Swertiamarin	--	C16 H22 O10	5.267	375.126	2.23477e+07	2.23857e+07	2.75258e+07	2.94356e+07	1.96345e+07	1.69179e+07	2.08731e+07	2.14934e+07	2.64873e+07	2.63473e+07	2.98664e+07	2.7652e+07	2.5021e+07	2.46539e+07	2.33487e+07	--	--	--	-	-	-	-
Com_2843_pos	Thromoboxane B1	--	C20 H36 O6	6.101	395.24	2.68672e+07	2.59226e+07	2.76362e+07	2.42231e+07	2.36103e+07	2.25264e+07	1.78472e+07	1.83886e+07	2.64715e+07	2.62761e+07	1.98879e+07	6.51655e+06	2.41742e+07	2.4542e+07	2.40896e+07	--	--	--	-	-	-	-
Com_8055_pos	7,8-Dihydroxyflavone	--	C15 H10 O4	1.219	255.062	3.98346e+06	5.47793e+06	5.17118e+06	4.88755e+06	5.17683e+06	4.12975e+06	6.69911e+06	6.8466e+06	5.53292e+06	6.44333e+06	6.47457e+06	4.84327e+06	6.06504e+06	3.4576e+06	5.95166e+06	--	--	--	-	-	-	-
Com_3412_pos	methyl 3,4,5-trihydroxycyclohex-1-ene-1-carboxylate	--	C8 H12 O5	5.038	211.058	2.48713e+07	2.19685e+07	1.66494e+07	1.41719e+07	1.00013e+07	8.25504e+06	1.29377e+07	1.11465e+07	1.87053e+07	1.85257e+07	1.44519e+07	1.40256e+07	1.4437e+07	1.61414e+07	1.57573e+07	--	--	--	-	-	-	-
Com_4622_pos	BMP (18:3/22:5)	--	C46 H75 O10 P	8.287	854.549	2.98684e+06	2.54005e+06	4.52923e+06	3.22492e+06	4.38417e+06	5.74877e+06	4.69383e+06	5.38096e+06	1.20105e+07	1.75835e+07	1.05386e+07	8.45534e+06	8.44713e+06	6.79749e+06	8.28739e+06	--	--	--	-	-	-	-
Com_8768_pos	--	Phenylglyoxylic acid	C8 H6 O3	5.412	151.039	2.92457e+06	3.04022e+06	2.16192e+06	2.34953e+06	5.45242e+06	5.12247e+06	3.79413e+06	3.31393e+06	3.76097e+06	3.50473e+06	3.34829e+06	2.97742e+06	3.38822e+06	3.73792e+06	3.27216e+06	Benzene and substituted derivatives	611-73-4	HMDB0001587	C02137	ko01120//Microbial metabolism in diverse environments;ko00360//Phenylalanine metabolism	Amino acid metabolism;Global and overview maps	Metabolism
Com_5678_pos	--	Linoleic acid	C18 H32 O2	8.181	281.247	8.63438e+06	8.57036e+06	1.04736e+07	8.45667e+06	5.61116e+06	5.36949e+06	6.18286e+06	6.17479e+06	9.65575e+06	7.59015e+06	8.14536e+06	9.53501e+06	7.40165e+06	8.12381e+06	7.63175e+06	Fatty Acyls	506-21-8	HMDB0006270	C01595	ko01100//Metabolic pathways;ko01040//Biosynthesis of unsaturated fatty acids;ko00591//Linoleic acid metabolism	Global and overview maps;Lipid metabolism	Metabolism
Com_14676_pos	--	Rotundine	C21 H25 N O4	9.704	356.187	393230	492952	894277	967003	703673	588830	1.56038e+06	924325	596468	895706	580462	339188	1.35594e+06	1.15541e+06	1.10748e+06	--	--	--	-	-	-	-
Com_7852_pos	--	Ganoderic acid C6	C30 H42 O8	7.408	531.292	3.0968e+06	996645	2.82145e+06	2.35004e+06	5.8105e+06	6.67499e+06	2.17489e+06	4.31682e+06	3.48852e+06	3.60767e+06	3.36275e+06	3.43681e+06	3.69601e+06	3.66881e+06	3.11364e+06	--	--	--	-	-	-	-
Com_3769_pos	1-Methyl-2-[(3S)-1-(2-methylbenzyl)-3-pyrrolidinyl]-1H-benzimidazole	--	C20 H23 N3	5.218	306.191	1.96329e+07	1.80441e+07	1.79292e+07	1.73699e+07	1.82074e+07	1.67362e+07	2.39016e+07	2.18861e+07	1.89608e+07	1.86137e+07	1.57401e+07	1.49075e+07	1.90982e+07	1.8505e+07	1.96399e+07	--	--	--	-	-	-	-
Com_14180_pos	--	Pomolic acid beta-D-glucopyranosyl ester	C36 H58 O9	9.098	635.412	1.6391e+06	1.42274e+06	633463	911245	618482	768062	1.18292e+06	1.0438e+06	1.0415e+06	1.44973e+06	952604	989201	940666	857639	791846	--	--	--	-	-	-	-
Com_3334_pos	Targinine	--	C7 H16 N4 O2	1.299	189.134	8.42408e+06	1.0484e+07	7.32754e+06	8.02534e+06	2.27398e+06	1.9396e+06	8.46923e+06	9.76289e+06	2.72517e+07	2.76348e+07	2.19365e+06	2.01762e+06	7.99375e+06	9.43281e+06	9.38723e+06	Carboxylic acids and derivatives	17035-90-4	HMDB0029416	-	-	-	-
Com_15190_pos	Levonorgestrel	--	C21 H28 O2	10.106	313.215	769869	782613	911057	853416	422083	446594	997036	945991	1.12462e+06	1.12051e+06	817746	766236	1.05466e+06	1.2128e+06	718826	Steroids and steroid derivatives	797-63-7	HMDB0014511	-	-	-	-
Com_3730_pos	Epibrassinolide	--	C28 H48 O6	10.373	481.351	1.58601e+07	1.51863e+07	1.88903e+07	1.82645e+07	1.6861e+07	1.69719e+07	1.32577e+07	1.28569e+07	1.18897e+07	1.26052e+07	8.53075e+06	8.24373e+06	1.47593e+07	1.40419e+07	1.534e+07	--	--	--	-	-	-	-
Com_10884_pos	--	5-Sulfanyl-1-pentanesulfonamide	C5 H13 N O2 S2	1.139	184.045	3.22917e+06	1.55595e+06	2.00184e+06	1.31055e+06	2.2276e+06	2.35949e+06	2.55887e+06	2.78564e+06	3.87456e+06	2.5638e+06	2.80618e+06	1.93268e+06	2.28405e+06	1.62475e+06	2.29632e+06	--	--	--	-	-	-	-
Com_14169_pos	--	N-lactoyl-phenylalanine	C12 H15 N O4	4.014	238.108	1.3643e+06	1.4123e+06	1.41858e+06	993503	1.47651e+06	1.32593e+06	1.16588e+06	1.2262e+06	1.81199e+06	1.73007e+06	1.4002e+06	1.47571e+06	1.08918e+06	1.29119e+06	1.30365e+06	Carboxylic acids and derivatives	-	HMDB0062175	-	-	-	-
Com_9070_pos	--	Hydroxycitric acid	C6 H8 O8	1.105	209.029	4.92234e+06	3.78408e+06	3.46305e+06	3.29876e+06	3.23904e+06	3.40944e+06	3.74666e+06	4.00553e+06	4.74182e+06	5.63094e+06	4.10335e+06	4.90432e+06	4.59724e+06	3.93512e+06	3.74558e+06	Carboxylic acids and derivatives	27750-10-3	HMDB0031159	-	-	-	-
Com_7718_pos	--	Tricin 4'-O-(beta-guaiacylglyceryl) ether 5-O-hexoside	C33 H36 O16	5.389	689.206	2.53337e+06	3.08617e+06	2.70103e+06	3.08385e+06	5.75376e+06	6.46133e+06	7.79079e+06	5.675e+06	6.01181e+06	5.78585e+06	5.17969e+06	5.49717e+06	5.68011e+06	4.77849e+06	5.5301e+06	--	--	--	-	-	-	-
Com_4792_pos	--	6,7,4'-Trihydroxyisoflavone	C15 H10 O5	5.96	271.06	1.40882e+06	842725	717843	774142	1.50918e+07	1.43773e+07	9.05794e+06	8.15585e+06	638289	779777	2.14575e+06	2.19036e+06	4.01511e+06	4.49524e+06	4.22676e+06	Isoflavonoids	17817-31-1	HMDB0031715	C14314	ko01110//Biosynthesis of secondary metabolites;ko00943//Isoflavonoid biosynthesis	Biosynthesis of other secondary metabolites;Global and overview maps	Metabolism
Com_6603_pos	L-5-Hydroxytryptophan	--	C11 H12 N2 O3	5.322	221.092	5.50392e+06	4.80514e+06	4.2565e+06	3.48099e+06	9.1144e+06	7.97506e+06	6.80839e+06	6.56112e+06	7.34422e+06	7.72848e+06	8.95331e+06	8.68021e+06	7.69003e+06	6.69906e+06	8.36298e+06	Indoles and derivatives	895096	HMDB0000472	-	-	-	-
Com_14783_pos	汐-Boswellic acid	--	C30 H48 O3	10.067	457.365	1.3589e+06	1.02734e+06	374230	326989	258767	299041	659708	972452	298102	514292	713011	629957	379947	487757	572559	--	--	--	-	-	-	-
Com_1343_pos	DGTS (2:0/3:0)	--	C15 H27 N O7	5.337	334.185	7.02232e+07	7.61843e+07	3.37463e+07	3.75013e+07	6.71837e+07	5.57876e+07	5.49801e+07	4.76164e+07	5.30778e+07	5.5658e+07	8.47669e+07	8.77166e+07	6.94247e+07	6.11472e+07	7.99006e+07	--	--	--	-	-	-	-
Com_6910_pos	1-(4-methylphenyl)-3,5-diphenylpent-2-ene-1,5-dione	--	C24 H20 O2	5.542	341.158	6.14339e+06	7.59124e+06	5.74976e+06	4.64432e+06	6.537e+06	6.06711e+06	9.4493e+06	7.19674e+06	7.12154e+06	7.20692e+06	7.90094e+06	8.92062e+06	7.23485e+06	6.80264e+06	7.23769e+06	--	--	--	-	-	-	-
Com_6509_pos	APH	--	C14 H21 N5 O4	4.883	306.154	6.68818e+06	6.34806e+06	4.95794e+06	5.74789e+06	9.38318e+06	8.47697e+06	7.482e+06	7.14956e+06	6.14751e+06	5.51718e+06	8.94809e+06	8.06444e+06	6.04078e+06	6.58093e+06	7.72842e+06	--	--	--	-	-	-	-
Com_4781_pos	--	Furanodiene	C15 H20 O	8.263	217.158	1.0978e+07	1.18615e+07	1.1814e+07	1.21364e+07	8.75126e+06	7.90413e+06	1.22967e+07	1.19297e+07	1.24895e+07	1.16036e+07	1.44997e+07	1.11326e+07	1.5135e+07	1.54791e+07	1.36238e+07	Prenol lipids	-	HMDB0036769	-	-	-	-
Com_558_pos	2-Hydroxycinnamic acid	--	C9 H8 O3	5.209	165.054	1.00234e+08	8.5584e+07	1.02543e+08	9.41162e+07	4.14112e+07	3.64692e+07	2.26622e+08	2.04548e+08	1.55941e+08	1.62596e+08	1.8142e+08	1.97012e+08	1.32344e+08	1.54721e+08	1.29664e+08	Cinnamic acids and derivatives	-	HMDB0134028	C01772	ko01110//Biosynthesis of secondary metabolites;ko01120//Microbial metabolism in diverse environments;ko00940//Phenylpropanoid biosynthesis;ko00360//Phenylalanine metabolism	Amino acid metabolism;Biosynthesis of other secondary metabolites;Global and overview maps	Metabolism
Com_6373_pos	--	Syringaldehyde	C9 H10 O4	5.416	183.065	5.29858e+06	6.07066e+06	3.76608e+06	3.99853e+06	9.66062e+06	9.20299e+06	7.55338e+06	7.39699e+06	6.60994e+06	7.18189e+06	6.89983e+06	6.93375e+06	8.17662e+06	6.12044e+06	7.26521e+06	--	--	--	-	-	-	-
Com_3160_pos	5-Methyl-7-methoxyisoflavone	--	C17 H14 O3	4.016	267.107	1.51488e+07	1.33152e+07	9.40246e+06	4.28916e+06	2.70653e+07	2.53253e+07	1.53491e+07	1.55333e+07	1.11025e+07	9.60669e+06	2.52501e+07	2.60384e+07	1.44414e+07	1.37312e+07	1.77787e+07	--	--	--	-	-	-	-
Com_5062_pos	Tuberostemonine	--	C22 H33 N O4	6.423	376.245	1.20776e+07	1.05351e+07	5.83642e+06	4.44508e+06	1.40426e+07	1.3791e+07	1.77099e+06	1.78447e+06	1.35584e+06	2.76088e+06	3.68959e+06	5.0269e+06	5.46461e+06	6.96486e+06	7.3926e+06	--	--	--	-	-	-	-
Com_10978_pos	--	Combretastatin A4	C18 H20 O5	6.012	317.138	1.01904e+06	731977	851100	580696	3.3884e+06	2.90281e+06	1.48608e+06	1.47242e+06	856137	717244	3.28372e+06	2.51995e+06	1.29921e+06	1.50176e+06	1.36689e+06	--	--	--	-	-	-	-
Com_3424_pos	Ormetroprim	--	C14 H18 N4 O2	5.561	297.13	1.29191e+07	2.30998e+07	6.61896e+06	1.32009e+07	1.30226e+07	7.94385e+06	1.25331e+07	9.54184e+06	9.20232e+06	1.17836e+07	7.03495e+06	7.00103e+06	1.28583e+07	1.1547e+07	8.5007e+06	--	--	--	-	-	-	-
Com_2086_pos	Angeloylgomisin H	--	C28 H36 O8	5.068	501.244	1.46419e+07	1.41327e+07	9.01243e+06	8.52292e+06	4.73434e+07	4.15451e+07	1.53031e+07	1.26026e+07	1.71461e+07	1.66426e+07	1.91864e+07	1.49309e+07	2.11308e+07	1.94876e+07	2.14279e+07	--	--	--	-	-	-	-
Com_14578_pos	2-hydroxy-3,6-diphenylcyclohexyl acetate	--	C20 H22 O3	11.319	333.15	172322	154500	532734	536036	1.43718e+06	1.37773e+06	419103	424294	157399	153937	173358	158280	559489	488575	428166	--	--	--	-	-	-	-
Com_3617_pos	trans-忖2-11-Methyl-dodecenoic acid	--	C13 H24 O2	5.629	213.184	1.28568e+07	1.26173e+07	1.66594e+07	1.46519e+07	2.06903e+07	2.20285e+07	1.77919e+07	1.79156e+07	1.68219e+07	1.58511e+07	2.49138e+07	2.51903e+07	2.24389e+07	1.96389e+07	2.01092e+07	--	--	--	-	-	-	-
Com_10184_pos	2-((Dimethylamino)methyl)phenol	--	C9 H13 N O	1.401	170.117	3.27185e+06	3.84586e+06	2.92777e+06	2.7513e+06	3.02983e+06	3.29774e+06	3.30081e+06	2.37511e+06	3.87064e+06	3.01545e+06	3.88732e+06	3.94696e+06	2.65467e+06	3.62076e+06	2.73883e+06	--	--	--	-	-	-	-
Com_1261_pos	1-[2,6-di(tert-butylamino)-4-methyl-3-pyridyl]ethan-1-one	--	C16 H27 N3 O	7.285	278.219	8.72273e+07	8.21933e+07	7.35027e+07	6.47027e+07	5.28232e+07	5.20801e+07	6.48566e+07	5.42096e+07	5.05244e+07	5.23999e+07	5.28934e+07	5.06588e+07	6.70682e+07	6.39506e+07	6.69291e+07	--	--	--	-	-	-	-
Com_3695_pos	Musk ketone	--	C14 H18 N2 O5	4.903	312.155	5.71124e+06	4.42735e+06	4.02335e+06	5.73385e+06	2.18747e+07	1.59005e+07	5.07012e+06	4.38241e+06	4.68239e+06	5.61829e+06	5.85321e+06	6.17975e+06	6.14661e+06	7.50788e+06	7.8954e+06	Organooxygen compounds	81-14-1	HMDB0031865	-	-	-	-
Com_10608_pos	--	Syringenone	C17 H24 O9	5.25	373.149	2.35016e+06	2.00574e+06	2.35274e+06	2.1897e+06	2.78165e+06	2.53801e+06	3.13622e+06	2.57244e+06	1.91994e+06	2.57198e+06	3.30352e+06	4.15321e+06	2.59469e+06	2.57958e+06	1.86915e+06	--	--	--	-	-	-	-
Com_7484_pos	ACar 8:1	--	C15 H28 N O4	5.403	286.201	6.86505e+06	6.94747e+06	2.88519e+06	2.49959e+06	2.577e+06	2.71245e+06	3.15917e+06	2.87465e+06	2.58969e+06	2.32835e+06	3.42425e+06	3.19007e+06	4.28324e+06	3.08823e+06	3.27398e+06	--	--	--	-	-	-	-
Com_849_pos	CHEMBL1616521	--	C26 H26 N2 O3	5.831	415.195	1.36359e+08	1.14633e+08	1.09064e+08	1.03659e+08	9.85884e+07	1.07401e+08	1.27553e+08	9.84697e+07	1.12666e+08	1.15824e+08	1.14615e+08	1.11275e+08	9.28844e+07	1.16719e+08	1.09173e+08	--	--	--	-	-	-	-
Com_1258_pos	LPC 14:1	--	C22 H44 N O7 P	5.282	466.301	7.22208e+07	6.06649e+07	7.27711e+07	7.35315e+07	3.78068e+07	3.81519e+07	7.84524e+07	7.21382e+07	5.1352e+07	5.52039e+07	3.56158e+07	3.53066e+07	5.79094e+07	5.80264e+07	6.12734e+07	--	--	--	-	-	-	-
Com_507_pos	Cinanserin	--	C20 H24 N2 O S	6.775	341.174	1.54443e+07	1.54398e+07	1.01233e+07	1.14648e+07	2.2181e+08	2.22204e+08	1.81313e+08	1.7349e+08	1.20582e+07	9.04235e+06	6.81982e+07	7.0173e+07	7.80686e+07	7.9967e+07	7.5196e+07	--	--	--	-	-	-	-
Com_4056_pos	16(R)-HETE	--	C20 H32 O3	7.952	343.224	8.04618e+06	6.91454e+06	4.63341e+06	1.48791e+06	8.97821e+06	1.9186e+07	1.13807e+07	1.09659e+07	6.98246e+06	5.95523e+06	1.0712e+07	1.02609e+07	1.06674e+07	9.37497e+06	9.59238e+06	Fatty Acyls	-	HMDB0004680	C14778	ko00590//Arachidonic acid metabolism	Lipid metabolism	Metabolism
Com_10525_pos	--	Ferulic acid O-hexoside	C16 H20 O9	5.447	735.209	2.45966e+06	2.32356e+06	2.85196e+06	3.17508e+06	1.70561e+06	1.7242e+06	2.62816e+06	2.01532e+06	2.22487e+06	2.87213e+06	1.94763e+06	1.84542e+06	2.72644e+06	2.2822e+06	2.80763e+06	--	--	--	-	-	-	-
Com_345_pos	Glu-Val-Phe	--	C19 H27 N3 O6	5.339	394.208	1.09466e+08	9.16862e+07	1.07688e+08	1.14661e+08	2.16111e+08	2.86268e+08	1.99977e+08	1.77817e+08	1.8289e+08	1.91294e+08	3.40018e+08	3.78426e+08	2.03803e+08	1.93522e+08	2.11471e+08	--	--	--	-	-	-	-
Com_600_pos	汐-Propylaminopentiophenone	--	C14 H21 N O	5.342	220.169	1.80076e+08	1.7656e+08	1.266e+08	1.19753e+08	1.77003e+08	1.49793e+08	2.12795e+08	1.94647e+08	1.87197e+08	1.81447e+08	2.07685e+08	2.04419e+08	1.75032e+08	1.76564e+08	1.80606e+08	--	--	--	-	-	-	-
Com_9275_pos	Mezlocillin	--	C21 H25 N5 O8 S2	11.197	557.152	173947	4.27828e+06	219284	3.17763e+06	188020	3.90694e+06	177849	5.23573e+06	140026	4.73898e+06	188774	4.43715e+06	297394	252364	167342	Carboxylic acids and derivatives	51481-65-3	HMDB0015083	-	-	-	-
Com_1505_pos	3-(4-hydroxy-3-methoxyphenyl)propanoic acid	--	C10 H12 O4	5.216	179.07	3.85914e+07	3.98722e+07	6.3044e+07	5.91216e+07	4.41166e+07	3.66683e+07	6.98222e+07	3.94665e+07	6.88892e+07	5.77384e+07	5.75422e+07	6.21274e+07	4.60746e+07	5.45223e+07	6.3098e+07	--	--	--	-	-	-	-
Com_917_pos	Ligustilide	--	C12 H14 O2	5.67	191.106	1.10254e+08	9.14163e+07	7.66425e+07	7.12363e+07	8.22701e+07	8.64929e+07	7.58159e+07	7.60083e+07	9.50006e+07	7.8452e+07	1.43508e+08	1.11928e+08	1.0005e+08	9.7456e+07	1.29989e+08	Dihydrofurans	4431-01-0	HMDB0034277	-	-	-	-
Com_12025_pos	7-(3,4-dihydroxyphenyl)-5-hydroxy-1-(4-hydroxyphenyl)heptan-3-one	--	C19 H22 O5	5.148	353.132	2.75602e+06	2.05545e+06	1.78554e+06	1.34433e+06	2.43954e+06	1.84828e+06	2.11915e+06	1.62987e+06	1.8855e+06	2.50969e+06	2.80781e+06	2.95405e+06	2.186e+06	2.58851e+06	1.94786e+06	--	--	--	-	-	-	-
Com_1161_pos	Prostaglandin E2-1-glyceryl ester	--	C23 H38 O7	7.41	409.255	2.37729e+07	2.32453e+07	5.69484e+07	5.49635e+07	1.78948e+07	2.07341e+07	8.609e+07	1.04161e+08	4.34328e+07	5.33106e+07	6.44074e+07	5.55631e+07	4.32627e+07	5.21225e+07	5.64989e+07	--	--	--	-	-	-	-
Com_2318_pos	Milbemycin A4 oxime	--	C32 H45 N O7	5.389	596.326	4.16069e+07	3.39187e+07	2.8112e+07	2.72236e+07	2.70025e+07	2.12106e+07	3.80246e+07	2.98364e+07	9.49046e+06	2.89738e+07	1.3523e+07	1.6986e+07	2.60957e+07	3.02039e+07	2.92875e+07	--	--	--	-	-	-	-
Com_11748_pos	--	Lithospermoside	C14 H19 N O8	4.762	330.118	1.72515e+06	1.57407e+06	1.32828e+06	1.14221e+06	2.65482e+06	2.87888e+06	1.70132e+06	1.60885e+06	1.47767e+06	1.36284e+06	2.84425e+06	2.78144e+06	1.7669e+06	2.58366e+06	1.57184e+06	--	--	--	-	-	-	-
Com_319_pos	--	Ziyuglycoside II	C35 H56 O8	9.6	605.402	1.89658e+08	1.7094e+08	2.19234e+08	2.06779e+08	1.17889e+08	3.64284e+08	2.13843e+08	1.09911e+08	1.70849e+08	1.71795e+08	4.70434e+07	1.39557e+08	2.02065e+08	1.96149e+08	1.94111e+08	--	--	--	-	-	-	-
Com_4515_pos	Quinoline	--	C9 H7 N	5.862	130.065	5.66909e+06	5.63282e+06	6.19887e+06	5.92771e+06	1.66143e+07	9.90236e+06	6.5633e+06	6.90299e+06	8.21464e+06	9.07089e+06	5.77889e+06	5.67564e+06	6.35317e+06	8.35628e+06	8.04081e+06	Quinolines and derivatives	91-22-5	HMDB0033731	-	-	-	-
Com_3277_pos	1-(3-ethyl-2,4-dihydroxy-6-methoxyphenyl)butan-1-one	--	C13 H18 O4	5.28	239.127	1.62058e+07	1.37873e+07	1.07579e+07	2.04409e+07	1.69469e+07	1.55675e+07	1.31725e+07	1.28488e+07	1.8547e+07	1.68837e+07	1.32223e+07	2.89766e+07	1.79977e+07	1.52049e+07	1.90502e+07	--	--	--	-	-	-	-
Com_8393_pos	Norbuprenorphine	--	C25 H35 N O4	8.045	414.269	5.09292e+06	5.14346e+06	650264	4.08906e+06	713803	5.90402e+06	2.74025e+06	2.3265e+06	3.26903e+06	3.45723e+06	6.40176e+06	5.5949e+06	3.70522e+06	3.46834e+06	4.03146e+06	Phenanthrenes and derivatives	-	HMDB0060546	-	-	-	-
Com_7072_pos	PLH	--	C17 H27 N5 O4	4.824	366.213	8.14876e+06	6.27874e+06	5.04005e+06	4.32305e+06	2.97163e+06	3.15676e+06	3.64894e+06	3.88384e+06	3.37612e+06	3.35458e+06	3.61575e+06	2.71986e+06	3.94108e+06	3.8376e+06	4.9372e+06	--	--	--	-	-	-	-
Com_72_pos	--	D-threo-Isocitric acid	C6 H8 O7	2.078	193.035	1.88668e+09	1.75978e+09	1.57925e+09	1.26786e+09	1.85222e+09	1.65075e+09	1.68244e+09	1.83366e+09	1.76223e+09	1.81505e+09	2.36959e+09	2.24115e+09	1.75293e+09	1.49623e+09	1.93345e+09	Carboxylic acids and derivatives	6061-97-8	HMDB0001874	-	-	-	-
Com_2780_pos	(5E)-7-methylidene-10-oxo-4-(propan-2-yl)undec-5-enoic acid	--	C15 H24 O3	6.142	253.179	3.00685e+07	2.96055e+07	2.60558e+07	2.70957e+07	2.27879e+07	1.66059e+07	1.09054e+07	2.40296e+07	1.62615e+07	2.32883e+07	1.87235e+07	1.74615e+07	2.29031e+07	2.72454e+07	2.36821e+07	--	--	--	-	-	-	-
Com_7464_pos	Heterophyllin B	--	C40 H58 N8 O8	9.238	779.454	1.01728e+06	1.14869e+06	914148	832404	1.1912e+06	1.15433e+06	6.3948e+06	7.85933e+06	3.89873e+06	4.70821e+06	3.3214e+06	2.6699e+06	1.7736e+06	1.73567e+06	2.80865e+06	--	--	--	-	-	-	-
Com_9489_pos	Thiamine	--	C12 H16 N4 O S	1.312	265.111	2.67928e+06	2.09192e+06	3.94156e+06	3.95718e+06	3.49182e+06	2.12123e+06	2.47998e+06	1.84318e+06	2.73794e+06	2.12202e+06	2.13132e+06	2.07989e+06	2.22555e+06	3.04034e+06	2.25822e+06	Diazines	59-43-8	HMDB0000235	C00378	ko01100//Metabolic pathways;ko02010//ABC transporters;ko00730//Thiamine metabolism;ko04122//Sulfur relay system	Folding, sorting and degradation;Global and overview maps;Membrane transport;Metabolism of cofactors and vitamins	Environmental Information Processing;Genetic Information Processing;Metabolism
Com_4709_pos	Diosgenin glucoside	--	C33 H52 O8	7.098	577.372	5.85069e+06	1.47875e+07	5.5881e+06	5.89132e+06	3.30941e+06	3.07649e+06	3.31129e+06	2.78767e+06	4.66063e+06	6.34242e+06	4.62704e+06	4.97138e+06	5.29423e+06	4.83162e+06	4.67252e+06	Steroids and steroid derivatives	14144-06-0	HMDB0029310	-	-	-	-
Com_5482_pos	NAT13-331713_POS	--	C26 H30 N4 O3	5.972	485.199	1.161e+07	1.17471e+07	4.93752e+06	4.01941e+06	5.4304e+06	5.05372e+06	3.01545e+06	2.62097e+06	4.19053e+06	3.00977e+06	1.0575e+07	1.07754e+07	7.65526e+06	7.75673e+06	7.95671e+06	--	--	--	-	-	-	-
Com_5043_pos	--	Scopolamine	C17 H21 N O4	5.836	304.154	5.98399e+06	5.80582e+06	4.81669e+06	5.23901e+06	9.12806e+06	1.40558e+07	4.2712e+06	4.04627e+06	3.73279e+06	5.97771e+06	6.35994e+06	6.08627e+06	5.34441e+06	5.25552e+06	6.47872e+06	Hydroxy acids and derivatives	51-34-3	HMDB0003573	C01851	ko01100//Metabolic pathways;ko01110//Biosynthesis of secondary metabolites;ko00960//Tropane, piperidine and pyridine alkaloid biosynthesis	Biosynthesis of other secondary metabolites;Global and overview maps	Metabolism
Com_5112_pos	Latanoprost	--	C26 H40 O5	7.442	433.294	1.1694e+07	1.31642e+07	1.15304e+07	1.12434e+07	1.04265e+07	1.04693e+07	1.18565e+07	9.76728e+06	1.3943e+07	1.29074e+07	1.43432e+07	1.51074e+07	1.18703e+07	1.34173e+07	1.35038e+07	Fatty Acyls	130209-82-4	HMDB0014792	-	-	-	-
Com_2816_pos	Methanandamide	--	C23 H39 N O2	8.407	384.282	2.27612e+07	2.00918e+07	2.80951e+07	2.51263e+07	1.95326e+07	2.10184e+07	1.76096e+07	1.56404e+07	1.3297e+07	1.09311e+07	1.42437e+07	1.45367e+07	1.71233e+07	1.78142e+07	1.82599e+07	--	--	--	-	-	-	-
Com_7049_pos	Roxane	--	C19 H28 N2 O4	8.697	349.214	5.87558e+06	6.01521e+06	6.79558e+06	6.52596e+06	7.46941e+06	5.16409e+06	7.68441e+06	6.67968e+06	9.04748e+06	8.65952e+06	2.03964e+06	4.98547e+06	5.80591e+06	7.03714e+06	7.08887e+06	--	--	--	-	-	-	-
Com_3857_pos	Tauroursodeoxycholic acid	--	C26 H45 N O6 S	8.565	517.336	3.70901e+06	2.46876e+06	3.06286e+06	3.82845e+06	4.16302e+06	4.58656e+06	2.31391e+07	2.0899e+07	1.55167e+07	1.47271e+07	6.2521e+06	6.13234e+06	9.32381e+06	9.74661e+06	7.13051e+06	Steroids and steroid derivatives	14605-22-2	HMDB0000874	-	-	-	-
Com_4968_pos	Methyl (2R,3S)-3-(benzoylamino)-2-hydroxy-3-phenylpropanoate	--	C17 H17 N O4	2.187	142.05	1.2946e+07	1.33645e+07	1.13181e+07	1.00866e+07	9.56922e+06	1.04581e+07	1.48392e+07	1.32421e+07	1.60386e+07	1.40758e+07	1.36724e+07	1.38997e+07	1.17925e+07	1.17009e+07	1.44409e+07	--	--	--	-	-	-	-
Com_7967_pos	HBMP (18:1-22:6-22:6)	--	C68 H107 O11 P	9.366	1148.77	5.10106e+06	4.79278e+06	3.13934e+06	3.22143e+06	1.10871e+06	1.23758e+06	1.25415e+06	2.33923e+06	6.41819e+06	7.17488e+06	2.77062e+06	2.60579e+06	3.41734e+06	2.71836e+06	3.5894e+06	--	--	--	-	-	-	-
Com_3_pos	Oleamide	--	C18 H35 N O	9.924	282.278	1.26395e+10	1.11788e+10	1.59886e+10	1.49212e+10	1.80539e+10	1.66742e+10	2.38207e+10	2.46281e+10	1.5812e+10	1.6506e+10	1.41129e+10	1.33878e+10	1.89207e+10	1.67089e+10	1.98748e+10	Fatty Acyls	301-02-0	HMDB0002117	-	-	-	-
Com_10687_pos	Eriodictyol	--	C15 H12 O6	5.517	289.071	1.59841e+06	1.98543e+06	2.03531e+06	3.06249e+06	2.44611e+06	2.53252e+06	2.57432e+06	2.20865e+06	2.22661e+06	3.35622e+06	3.24413e+06	3.53927e+06	2.87057e+06	2.46621e+06	2.43701e+06	Flavonoids	552-58-9	HMDB0005810	C05631	ko01110//Biosynthesis of secondary metabolites;ko00941//Flavonoid biosynthesis	Biosynthesis of other secondary metabolites;Global and overview maps	Metabolism
Com_8740_pos	5,8-dihydroxy-10-methyl-5,8,9,10-tetrahydro-2H-oxecin-2-one	--	C10 H14 O4	5.74	181.086	3.01336e+06	2.16737e+06	2.34041e+06	2.03668e+06	2.22179e+06	2.71984e+06	2.17003e+06	2.84388e+06	1.87023e+06	2.11894e+06	6.35147e+06	5.19931e+06	2.93049e+06	2.5248e+06	2.6454e+06	--	--	--	-	-	-	-
Com_9295_pos	diethyl 1-(2,3,4,5,6-pentamethylphenyl)hydrazine-1,2-dicarboxylate	--	C17 H26 N2 O4	7.338	323.198	1.30815e+06	3.10854e+06	3.02269e+06	3.03623e+06	3.87632e+06	4.86522e+06	4.41908e+06	4.25934e+06	5.04664e+06	5.12759e+06	3.37626e+06	3.45665e+06	3.52368e+06	3.81004e+06	3.47575e+06	--	--	--	-	-	-	-
Com_14550_pos	ethyl 4-({[(3-morpholinopropyl)amino]carbothioyl}amino)benzoate	--	C17 H25 N3 O3 S	4.668	374.144	908647	978400	632782	615407	528763	512214	1.6258e+06	1.31098e+06	829920	1.07918e+06	1.43508e+06	919687	773805	833173	739017	--	--	--	-	-	-	-
Com_924_pos	污-Linolenic acid ethyl ester	--	C20 H34 O2	10.723	313.273	7.81998e+07	6.43983e+07	6.21038e+07	4.97936e+07	3.62161e+07	6.42802e+07	9.86856e+07	4.79879e+07	1.21358e+08	8.90706e+07	1.22621e+08	1.39851e+08	5.73179e+07	8.84494e+07	9.87757e+07	--	--	--	-	-	-	-
Com_5671_pos	Phillygenin	--	C21 H24 O6	5.649	373.164	6.87055e+06	7.6608e+06	9.07134e+06	9.92077e+06	1.12254e+07	1.09019e+07	1.04621e+07	1.0175e+07	9.53663e+06	9.62857e+06	9.99763e+06	1.04419e+07	1.17586e+07	1.05068e+07	1.06942e+07	--	--	--	-	-	-	-
Com_3064_pos	5-(tert-butyl)-2-methyl-N-(5-methyl-3-isoxazolyl)-3-furamide	--	C14 H18 N2 O3	8.403	285.123	8.34514e+06	9.76431e+06	8.85691e+06	8.75611e+06	1.59312e+07	1.3231e+07	2.11518e+07	3.01435e+07	2.43095e+07	2.34472e+07	1.38196e+07	2.06254e+07	2.12187e+07	1.97884e+07	1.73482e+07	--	--	--	-	-	-	-
Com_12793_pos	Qingyangshengenin	--	C28 H36 O8	4.666	518.281	1.31904e+06	1.23602e+06	1.19365e+06	978228	410947	349290	2.33006e+06	2.4526e+06	805165	1.14884e+06	1.49698e+06	1.30624e+06	1.23835e+06	1.26888e+06	1.37305e+06	--	--	--	-	-	-	-
Com_11400_pos	--	Benzoylpaeoniflorin	C30 H32 O12	6.769	585.197	1.22684e+06	2.28937e+06	2.76577e+06	2.43137e+06	716779	1.05931e+06	655865	608123	661872	764244	729053	787783	1.60155e+06	1.07776e+06	1.65496e+06	--	--	--	-	-	-	-
Com_3770_pos	Laetanine	--	C18 H19 N O4	5.211	314.143	5.79564e+06	1.10359e+07	7.59821e+06	8.59897e+06	2.07869e+07	2.12052e+07	6.05001e+06	6.24142e+06	1.35679e+07	7.62693e+06	1.92466e+07	9.97989e+06	1.47902e+07	1.35542e+07	9.24858e+06	--	--	--	-	-	-	-
Com_10605_pos	10-Nitrolinoleate	--	C18 H31 N O4	9.371	343.26	3.63965e+06	2.69469e+06	2.95156e+06	2.53491e+06	3.07242e+06	3.67359e+06	1.98247e+06	1.76617e+06	2.97845e+06	3.58459e+06	3.19319e+06	2.42357e+06	3.50536e+06	3.5336e+06	2.71262e+06	Fatty Acyls	774603-04-2	HMDB0005049	-	-	-	-
Com_3851_pos	4-(3,4-dimethylphenyl)-1-thia-4-azaspiro[4.5]decan-3-one	--	C16 H21 N O S	5.125	276.144	2.07592e+07	1.96154e+07	1.44959e+07	1.65299e+07	5.44633e+06	4.19611e+06	1.60138e+07	1.39216e+07	1.75126e+07	1.60612e+07	1.39692e+07	1.52965e+07	1.53436e+07	1.6078e+07	1.70094e+07	--	--	--	-	-	-	-
Com_1233_pos	PE (3:0/19:2)	--	C27 H50 N O8 P	5.64	548.342	7.3371e+07	7.14126e+07	7.41124e+07	7.53303e+07	6.7617e+07	6.66968e+07	5.65566e+07	5.27711e+07	7.83498e+07	7.65957e+07	5.13218e+07	5.11909e+07	7.54572e+07	6.91959e+07	6.87161e+07	--	--	--	-	-	-	-
Com_561_pos	(2E,4E)-N-(2-methylpropyl)dodeca-2,4-dienamide	--	C16 H29 N O	8.562	252.232	1.1005e+08	1.37453e+08	9.04909e+07	9.05713e+07	1.6904e+08	1.61772e+08	2.18062e+08	1.96947e+08	1.31872e+08	1.11175e+08	2.30721e+08	2.16159e+08	1.36483e+08	1.6196e+08	1.7218e+08	--	--	--	-	-	-	-
Com_6074_pos	2-Arachidonyl Glycerol ether	--	C23 H40 O3	9.869	387.286	9.64892e+06	9.58243e+06	6.28822e+06	4.83813e+06	3.05242e+06	3.54406e+06	1.17454e+07	1.08507e+07	9.69389e+06	7.2989e+06	5.40162e+06	3.90518e+06	6.90223e+06	9.75903e+06	4.97848e+06	Endocannabinoids	222723-55-9	HMDB0013657	-	-	-	-
Com_4787_pos	Anastrozole	--	C17 H19 N5	5.381	312.18	1.41427e+07	1.43563e+07	4.5921e+06	5.2179e+06	4.81817e+06	9.61113e+06	8.92171e+06	8.35118e+06	7.90972e+06	7.63508e+06	8.43894e+06	7.27717e+06	9.89918e+06	9.39869e+06	8.73881e+06	Benzene and substituted derivatives	120511-73-1	HMDB0015348	-	-	-	-
Com_3831_pos	Tegaserod	--	C16 H23 N5 O	5.425	302.196	1.92613e+07	1.97592e+07	8.40864e+06	8.29224e+06	9.03502e+06	8.07423e+06	8.45941e+06	7.8688e+06	9.67149e+06	9.91879e+06	9.24951e+06	9.21165e+06	1.03667e+07	1.10857e+07	1.03683e+07	--	--	--	-	-	-	-
Com_2564_pos	Cryptotanshinone	--	C19 H20 O3	4.884	297.154	1.71257e+07	1.76767e+07	1.44299e+07	1.49133e+07	1.90093e+07	1.65889e+07	8.2912e+06	9.76797e+06	8.41281e+06	5.94298e+06	4.14203e+07	2.10408e+07	8.97252e+06	9.18728e+06	1.1887e+07	Prenol lipids	35825-57-1	HMDB0035220	-	-	-	-
Com_2289_pos	3-hydroxy-4-methoxy-9H-xanthen-9-one	--	C14 H10 O4	5.088	243.065	5.71498e+06	4.54106e+06	2.63526e+06	2.93601e+06	3.79913e+07	4.16856e+07	2.751e+07	2.54843e+07	2.72804e+06	3.15978e+06	1.0672e+07	1.24872e+07	1.67844e+07	1.62975e+07	1.6634e+07	--	--	--	-	-	-	-
Com_2691_pos	Nepodin	--	C13 H12 O3	5.449	217.086	2.48423e+07	2.53655e+07	2.72234e+07	2.37515e+07	2.69008e+07	2.63882e+07	2.90404e+07	2.26219e+07	3.03466e+07	2.81917e+07	3.84578e+07	3.63862e+07	2.74193e+07	2.88811e+07	2.86457e+07	--	--	--	-	-	-	-
Com_5017_pos	Docosatrienoic acid	--	C22 H38 O2	10.54	335.291	8.15109e+06	1.3471e+07	1.10185e+07	1.03205e+07	1.39158e+07	1.20963e+07	9.25763e+06	8.84167e+06	7.55348e+06	7.74188e+06	7.63376e+06	7.02092e+06	1.02844e+07	1.04358e+07	1.07799e+07	Fatty Acyls	28845-86-5	HMDB0002823	-	-	-	-
Com_1104_pos	2-Arachidonoyl glycerol	--	C23 H38 O4	9.056	361.273	7.69493e+07	9.78261e+07	7.46746e+07	7.29724e+07	7.55397e+07	8.41404e+07	8.2737e+07	6.72543e+07	5.95826e+07	5.79906e+07	7.59932e+07	8.63758e+07	6.28862e+07	7.27933e+07	7.05993e+07	--	--	--	-	-	-	-
Com_6935_pos	--	S-Methyl-5'-thioadenosine	C11 H15 N5 O3 S	1.309	617.168	5.56852e+06	4.9618e+06	5.75962e+06	5.85587e+06	1.35799e+06	1.13318e+06	1.21908e+06	1.61106e+06	7.52699e+06	7.92896e+06	9.66153e+06	9.3954e+06	2.25467e+06	2.7728e+06	2.56176e+06	5'-deoxyribonucleosides	2457-80-9	HMDB0001173	C00170	ko01100//Metabolic pathways;ko00270//Cysteine and methionine metabolism;ko00908//Zeatin biosynthesis	Amino acid metabolism;Global and overview maps;Metabolism of terpenoids and polyketides	Metabolism
Com_10838_pos	Saikosaponin A	--	C42 H68 O13	9.028	380.245	2.07724e+06	1.79701e+06	2.13851e+06	1.65947e+06	649642	751015	3.15282e+06	3.28241e+06	3.7157e+06	3.86146e+06	1.9628e+06	2.42671e+06	1.9532e+06	2.02099e+06	1.7518e+06	--	--	--	-	-	-	-
Com_16757_pos	--	LPC(1-acyl 16:0)	C24 H50 N O7 P	10.112	496.341	43563.4	47915.7	72434.1	75458.6	36498.7	27995.7	100219	303629	53472.4	67068.7	23313.5	44753.5	82833.1	93146.7	59805	--	--	--	-	-	-	-
Com_10902_pos	--	Leonurine Hydrochloride	C14 H22 Cl N3 O5	7.665	348.133	2.42388e+06	2.22393e+06	2.23737e+06	2.53333e+06	3.06496e+06	3.44082e+06	1.9229e+06	2.29768e+06	1.85451e+06	2.17344e+06	2.35904e+06	2.18819e+06	2.7154e+06	2.23936e+06	2.82447e+06	--	--	--	-	-	-	-
Com_1973_pos	4-Aminomethylcyclohexanecarboxylic acid	--	C8 H15 N O2	4.837	158.118	4.38625e+07	4.1087e+07	2.96842e+07	2.94055e+07	1.31699e+07	1.516e+07	4.53211e+07	4.15828e+07	2.20608e+07	2.07417e+07	5.90843e+07	5.63339e+07	3.4135e+07	3.46698e+07	3.46953e+07	--	--	--	-	-	-	-
Com_5162_pos	(2E)-6-hydroxy-2-methyl-6-(4-methylphenyl)hept-2-enoic acid	--	C15 H20 O3	7.386	231.135	1.36139e+07	1.25928e+07	1.15303e+07	9.66145e+06	1.13579e+07	1.13869e+07	1.0337e+07	9.19042e+06	1.50141e+07	1.50072e+07	1.20637e+07	1.16032e+07	1.1822e+07	1.27083e+07	1.30781e+07	--	--	--	-	-	-	-
Com_1660_pos	--	Glucosamine	C6 H13 N O5	1.364	180.086	4.55919e+07	4.30552e+07	4.80278e+07	4.31052e+07	6.20627e+07	5.7505e+07	4.27543e+07	3.98913e+07	5.29367e+07	4.66477e+07	4.57968e+07	4.37682e+07	4.54676e+07	5.04027e+07	5.12011e+07	Organooxygen compounds	3416-24-8	HMDB0001514	C00329	ko01100//Metabolic pathways;ko00520//Amino sugar and nucleotide sugar metabolism	Carbohydrate metabolism;Global and overview maps	Metabolism
Com_14626_pos	methyl isoquinoline-3-carboxylate	--	C11 H9 N O2	0.523	188.07	241262	277142	249944	324595	1.41591e+06	181268	367538	744189	352859	249128	204536	363652	405022	304386	197176	--	--	--	-	-	-	-
Com_4844_pos	--	N alpha-Acetyl-L-Arginine	C8 H16 N4 O3	1.376	217.129	6.64958e+06	6.81686e+06	7.74162e+06	7.52947e+06	1.48731e+07	1.18541e+07	7.77036e+06	9.46183e+06	8.83291e+06	1.05561e+07	9.89897e+06	9.51415e+06	9.52103e+06	9.06518e+06	8.92313e+06	--	--	--	-	-	-	-
Com_3462_pos	5-nitrothiophene-3-carbaldehyde 3-(2-pyridyl)hydrazone	--	C10 H8 N4 O2 S	1.21	249.045	1.28561e+07	1.73017e+07	1.89298e+07	2.02389e+07	1.21318e+07	1.19644e+07	2.04219e+07	2.10867e+07	1.65659e+07	1.59577e+07	1.55547e+07	1.42087e+07	1.24539e+07	1.60888e+07	1.86649e+07	--	--	--	-	-	-	-
Com_3888_pos	PC (21:2/21:2)	--	C50 H92 N O8 P	11.141	866.662	476092	440987	1.82184e+07	480024	569197	572416	652816	914644	581309	535078	574443	602372	781984	573257	541868	--	--	--	-	-	-	-
Com_6483_pos	Methyl gallate	--	C8 H8 O5	1.117	203.058	7.64532e+06	7.46986e+06	7.51784e+06	6.62886e+06	8.21175e+06	8.06708e+06	7.09803e+06	8.96022e+06	8.91277e+06	8.10798e+06	1.09316e+07	8.25962e+06	7.46413e+06	7.82476e+06	8.02455e+06	--	--	--	-	-	-	-
Com_12506_pos	INK	--	C16 H31 N5 O5	4.014	189.123	2.48914e+06	2.21574e+06	1.96124e+06	1.70395e+06	2.25477e+06	2.24536e+06	1.56938e+06	1.63148e+06	1.41912e+06	1.21565e+06	1.7847e+06	1.50791e+06	1.72022e+06	1.91459e+06	1.69832e+06	--	--	--	-	-	-	-
Com_1456_pos	1,4-Naphthoquinone	--	C10 H6 O2	1.118	159.032	7.30642e+07	6.57016e+07	5.93333e+07	6.00974e+07	6.58707e+07	5.01572e+07	6.47379e+07	6.58859e+07	6.89657e+07	8.07538e+07	7.60879e+07	7.65006e+07	6.64832e+07	6.57155e+07	7.27048e+07	--	--	--	-	-	-	-
Com_8466_pos	Oxytetracycline	--	C22 H24 N2 O9	10.486	483.133	419835	4.79509e+06	383482	4.41778e+06	340910	4.93694e+06	541254	6.23991e+06	360876	6.1713e+06	296902	6.52472e+06	846189	1.4948e+06	1.02635e+06	Tetracyclines	79-57-2	HMDB0014733	C06624	ko01130//Biosynthesis of antibiotics	Global and overview maps	Metabolism
Com_12757_pos	--	Griffonilide	C8 H8 O4	6.081	169.049	838364	595856	2.06358e+06	554254	681904	549315	509420	543433	564242	555510	573701	831991	870504	541701	615533	--	--	--	-	-	-	-
Com_6404_pos	Diacetoxyscirpenol	--	C19 H26 O7	5.512	384.202	7.73179e+06	9.12364e+06	368447	5.50318e+06	3.40164e+06	2.20042e+06	3.3232e+06	2.70225e+06	3.05467e+06	3.64565e+06	1.77161e+06	3.63004e+06	4.74985e+06	4.52469e+06	3.88461e+06	Prenol lipids	2270-40-8	HMDB0035104	-	-	-	-
Com_4400_pos	--	LysoPC 12:1	C20 H36 N O7 P	5.702	434.231	5.73438e+06	4.55726e+06	2.51106e+06	3.039e+06	1.73937e+07	3.75389e+06	9.14469e+06	2.19642e+06	1.69492e+06	2.53865e+06	1.50654e+07	3.99801e+06	3.05169e+06	3.7588e+06	3.05225e+06	--	--	--	-	-	-	-
Com_4413_pos	Quinidine HCl	--	C20 H24 N2 O2	5.023	325.185	1.26828e+07	1.31245e+07	1.02071e+07	7.82193e+06	1.40953e+07	1.55241e+07	1.32506e+07	1.84625e+07	1.14155e+07	1.24631e+07	1.58348e+07	1.51159e+07	1.22776e+07	1.48053e+07	1.31166e+07	--	--	--	-	-	-	-
Com_5260_pos	R-1 Methanandamide phosphate	--	C23 H40 N O5 P	9.093	905.507	1.75756e+06	1.63636e+06	4.72516e+06	1.3044e+06	3.65354e+06	2.82506e+06	1.4542e+07	1.41243e+07	6.81068e+06	4.19261e+06	1.18556e+07	1.14975e+07	6.85184e+06	5.82209e+06	6.22005e+06	--	--	--	-	-	-	-
Com_14187_pos	--	N-Methyl-L-arginine hydrochloride	C7 H17 Cl N4 O2	7.063	449.214	845059	785938	752311	1.29492e+06	1.37025e+06	1.59051e+06	901141	1.2294e+06	859376	1.34432e+06	1.38111e+06	1.13975e+06	1.61117e+06	1.35349e+06	815096	--	--	--	-	-	-	-
Com_9194_pos	--	senkyunolide O	C24 H28 O4	9.925	381.206	2.86477e+06	3.57592e+06	4.10487e+06	3.85534e+06	3.99743e+06	3.27414e+06	4.9796e+06	4.6052e+06	3.28391e+06	3.19405e+06	3.52109e+06	3.45897e+06	4.96634e+06	4.10781e+06	3.57035e+06	--	--	--	-	-	-	-
Com_7880_pos	TQH	--	C15 H24 N6 O6	11.533	385.179	6.54326e+06	5.43286e+06	4.57524e+06	3.89168e+06	4.87328e+06	5.84213e+06	6.10113e+06	5.3138e+06	7.39212e+06	6.95297e+06	3.61801e+06	7.49684e+06	4.04093e+06	5.09702e+06	2.4362e+06	--	--	--	-	-	-	-
Com_743_pos	2-({2-oxo-2-[(2-oxo-3-azepanyl)amino]ethyl}sulfanyl)acetic acid	--	C10 H16 N2 O4 S	2.334	261.094	5.65001e+07	5.93203e+07	5.63146e+07	3.95646e+07	1.54555e+08	9.89135e+07	8.0801e+07	1.02282e+08	6.14956e+07	4.94616e+07	1.82228e+08	1.63337e+08	5.70246e+07	9.24799e+07	9.34735e+07	--	--	--	-	-	-	-
Com_8608_pos	2-{1-[2-(4-benzhydrylpiperazino)-2-oxoethyl]cyclopentyl}acetic acid	--	C26 H32 N2 O3	7.134	421.255	3.90767e+06	3.14896e+06	2.99015e+06	4.78189e+06	3.54564e+06	2.85147e+06	4.55765e+06	4.19182e+06	3.56216e+06	2.5416e+06	3.61203e+06	3.45512e+06	3.85374e+06	3.24759e+06	3.28977e+06	--	--	--	-	-	-	-
Com_12043_pos	Salvianolic acid C	--	C26 H20 O10	5.822	493.11	2.7484e+06	2.52693e+06	878740	1.11662e+06	1.58433e+06	1.29997e+06	823098	1.24284e+06	2.09333e+06	1.70757e+06	1.09189e+06	1.74184e+06	2.22886e+06	1.68502e+06	1.6266e+06	--	--	--	-	-	-	-
Com_9707_pos	Ubenimex	--	C16 H24 N2 O4	4.89	309.178	1.55658e+06	1.73472e+06	885513	1.05012e+06	333191	315836	5.01509e+06	4.29138e+06	791039	1.2855e+06	1.91041e+06	2.27642e+06	1.44532e+06	1.23999e+06	1.64179e+06	--	--	--	-	-	-	-
Com_2189_pos	1-Palmitoylglycerol	--	C19 H38 O4	9.075	331.284	1.19003e+07	1.25104e+07	1.65608e+07	1.37642e+07	2.90915e+07	2.57239e+07	4.98934e+07	4.54776e+07	2.14879e+07	2.41745e+07	2.56432e+07	2.57344e+07	2.58259e+07	2.51248e+07	2.32254e+07	Glycerolipids	32899-41-5	HMDB0011564	-	-	-	-
Com_2451_pos	Prostaglandin G2	--	C20 H32 O6	7.11	352.255	2.4921e+07	2.27516e+07	3.37747e+07	2.94537e+07	1.93025e+07	1.72151e+07	3.45621e+07	3.42387e+07	2.95572e+07	2.77669e+07	2.95841e+07	2.98301e+07	3.04012e+07	2.62161e+07	2.90916e+07	Fatty Acyls	51982-36-6	HMDB0003235	C05956	ko01100//Metabolic pathways;ko00590//Arachidonic acid metabolism	Global and overview maps;Lipid metabolism	Metabolism
Com_7806_pos	7-(2-hydroxypropan-2-yl)-1,4a-dimethyl-decahydronaphthalen-1-ol	--	C15 H28 O2	5.893	223.205	6.87121e+06	5.87916e+06	3.23028e+06	2.87734e+06	4.37223e+06	3.86066e+06	3.15258e+06	3.13083e+06	3.35255e+06	2.88792e+06	4.50906e+06	5.09903e+06	4.38498e+06	3.91271e+06	4.72582e+06	--	--	--	-	-	-	-
Com_3270_pos	1,7-Diphenylhept-4-en-3-one	--	C19 H20 O	5.221	265.154	2.61693e+07	2.4201e+07	1.81719e+07	2.09857e+07	1.44054e+07	1.41791e+07	1.85781e+07	2.20676e+07	1.32699e+07	1.20869e+07	1.50513e+07	1.48235e+07	1.80115e+07	1.67392e+07	1.70141e+07	--	--	--	-	-	-	-
Com_13392_pos	--	Brucine	C23 H26 N2 O4	7.717	395.195	1.27479e+06	969547	772885	542922	769510	727485	942847	1.05711e+06	2.20962e+06	2.11433e+06	1.34921e+06	893032	1.10217e+06	1.0707e+06	1.07613e+06	--	--	--	-	-	-	-
Com_1035_pos	Capryloylglycine	--	C10 H19 N O3	4.124	202.144	9.55765e+07	8.17432e+07	8.42259e+07	9.32053e+07	8.02078e+07	8.22945e+07	9.32513e+07	1.04115e+08	1.19296e+08	1.21641e+08	6.9484e+07	5.25699e+07	8.76282e+07	9.65884e+07	8.89006e+07	Carboxylic acids and derivatives	14246-53-8	HMDB0000832	-	-	-	-
Com_14283_pos	H-gamma-glutamyl-glutamine	--	C10 H17 N3 O6	4.896	276.122	1.59405e+06	959499	727260	610852	605287	519824	767195	453803	294706	578269	650932	765770	1.14271e+06	706738	657366	--	--	--	-	-	-	-
Com_15438_pos	--	N-Acetyl-L-methionine	C7 H13 N O3 S	5.201	192.069	804211	655235	937775	899101	823202	777981	914175	934708	450084	481349	672914	705046	718786	677439	555401	Carboxylic acids and derivatives	65-82-7	HMDB0011745	-	-	-	-
Com_4911_pos	--	Tyramine	C8 H11 N O	5.264	138.091	1.32232e+07	1.38471e+07	1.17119e+07	1.1887e+07	1.1301e+07	1.1211e+07	8.64182e+06	9.34914e+06	1.51319e+07	1.28682e+07	1.26456e+07	1.08199e+07	1.24191e+07	1.31671e+07	1.24596e+07	Benzene and substituted derivatives	-	HMDB0062629	C00483	ko01110//Biosynthesis of secondary metabolites;ko00350//Tyrosine metabolism;ko00950//Isoquinoline alkaloid biosynthesis	Amino acid metabolism;Biosynthesis of other secondary metabolites;Global and overview maps	Metabolism
Com_5137_pos	N1-(2,6-dimorpholino-3-pyridyl)-4-methylbenzamide	--	C21 H26 N4 O3	6.474	383.203	1.27882e+07	1.30777e+07	8.73299e+06	6.99318e+06	9.30808e+06	7.66486e+06	6.34006e+06	6.40322e+06	9.24846e+06	7.60925e+06	8.82748e+06	6.79157e+06	9.48057e+06	1.05575e+07	9.89633e+06	--	--	--	-	-	-	-
Com_5326_pos	Schisandrin B	--	C23 H28 O6	4.956	401.201	8.02647e+06	6.66613e+06	4.40353e+06	9.88005e+06	9.24462e+06	1.21529e+07	6.47736e+06	7.90711e+06	1.04682e+07	8.56223e+06	6.83549e+06	7.33353e+06	1.29267e+07	7.82345e+06	7.18578e+06	--	--	--	-	-	-	-
Com_1670_pos	汐-Zearalanol	--	C18 H26 O5	6.588	345.167	5.78017e+07	4.88514e+07	3.46928e+07	3.18593e+07	4.66821e+07	6.16431e+07	3.94038e+07	3.61064e+07	3.81786e+07	4.05644e+07	5.01354e+07	3.72725e+07	4.10479e+07	4.33383e+07	3.96349e+07	--	--	--	-	-	-	-
Com_3972_pos	N-Methylisoleucine	--	C7 H15 N O2	1.378	146.117	1.6619e+07	1.88812e+07	1.10536e+07	1.14386e+07	1.4201e+07	1.6454e+07	1.94036e+07	1.99038e+07	1.21799e+07	1.31859e+07	1.7872e+07	1.59356e+07	1.34649e+07	1.71926e+07	1.68386e+07	--	--	--	-	-	-	-
Com_7615_pos	Harringtonine	--	C28 H37 N O9	8.488	532.264	7.17715e+06	5.5991e+06	5.17134e+06	4.36335e+06	1.53601e+06	1.33985e+06	3.2329e+06	2.18123e+06	2.9077e+06	3.45397e+06	2.76698e+06	3.05758e+06	2.40585e+06	2.86478e+06	3.11332e+06	--	--	--	-	-	-	-
Com_12111_pos	--	Protobioside	C45 H74 O18	9.191	903.492	644747	1.62067e+06	2.38183e+06	1.36574e+06	2.5063e+06	2.46098e+06	2.79745e+06	2.55968e+06	2.03764e+06	1.96852e+06	1.19512e+06	1.97647e+06	1.27402e+06	2.09308e+06	1.98853e+06	--	--	--	-	-	-	-
Com_83_pos	octadec-9-ynoic acid	--	C18 H32 O2	9.309	263.236	1.1173e+09	7.57414e+08	7.17984e+08	4.73464e+08	1.47848e+09	1.37161e+09	6.31626e+08	1.92027e+09	7.32436e+08	1.00156e+09	8.69389e+08	7.46132e+08	1.33112e+09	1.43694e+09	7.37403e+08	--	--	--	-	-	-	-
Com_7099_pos	LPE 16:0	--	C21 H44 N O7 P	9.143	454.292	2.95632e+06	5.44696e+06	6.419e+06	5.16959e+06	3.43317e+06	4.15111e+06	6.19947e+06	8.55363e+06	3.70551e+06	3.73223e+06	2.74468e+06	3.05057e+06	4.62335e+06	4.91541e+06	4.49258e+06	--	--	--	-	-	-	-
Com_3644_pos	16汐-Hydroxydehydroepiandrosterone	--	C19 H28 O3	8.35	322.243	2.12043e+07	2.03957e+07	1.99169e+07	1.85291e+07	7.45944e+06	6.44069e+06	9.62551e+06	9.80315e+06	1.06757e+07	1.16332e+07	1.39703e+07	1.25604e+07	1.25787e+07	1.42374e+07	1.73413e+07	--	--	--	-	-	-	-
Com_10055_pos	Enrofloxacin	--	C19 H22 F N3 O3	4.745	360.164	3.29858e+06	3.27494e+06	2.54773e+06	1.69205e+06	3.14468e+06	3.48359e+06	2.80336e+06	2.62724e+06	3.18956e+06	2.99091e+06	4.79958e+06	3.41357e+06	3.67788e+06	4.14743e+06	3.88021e+06	Quinolines and derivatives	93106-60-6	HMDB0029861	-	-	-	-
Com_1536_pos	LSD-d3	--	C20 H22 [2]H3 N3 O	10.696	327.226	6.02267e+07	6.33475e+07	4.50115e+07	4.26556e+07	6.85824e+07	5.78821e+07	4.75904e+07	4.07841e+07	3.4152e+07	3.2634e+07	2.36901e+07	2.18222e+07	5.67649e+07	5.49595e+07	5.63182e+07	--	--	--	-	-	-	-
Com_4036_pos	N-{5-[(dimethylamino)sulfonyl]-2-methylphenyl}cyclohexanecarboxamide	--	C16 H24 N2 O3 S	5.902	303.18	6.84617e+06	6.44282e+06	8.80756e+06	7.2787e+06	4.71923e+06	6.05515e+06	2.1814e+07	1.93999e+07	2.20402e+06	7.26093e+06	8.50037e+06	4.19231e+06	8.40272e+06	7.36069e+06	7.99394e+06	--	--	--	-	-	-	-
Com_524_pos	Allocryptopine	--	C21 H23 N O5	1.365	370.17	2.2121e+08	1.99478e+08	1.45229e+08	1.42966e+08	1.42003e+08	1.43806e+08	1.06823e+08	1.08315e+08	2.42956e+08	2.2799e+08	6.91805e+07	6.54653e+07	1.60092e+08	1.6161e+08	1.7759e+08	--	--	--	C02134	ko01110//Biosynthesis of secondary metabolites;ko00950//Isoquinoline alkaloid biosynthesis	Biosynthesis of other secondary metabolites;Global and overview maps	Metabolism
Com_6537_pos	LPE 18:4	--	C23 H40 N O7 P	6.746	474.261	3.52683e+06	3.51388e+06	4.98599e+06	3.82011e+06	3.35436e+06	2.91632e+06	9.95127e+06	7.18802e+06	4.15389e+06	7.4937e+06	1.01468e+07	1.0483e+07	5.86905e+06	5.47313e+06	7.20545e+06	--	--	--	-	-	-	-
Com_10704_pos	1-(4-methyl-2-pyridyl)pyrrolidine-2,5-dione	--	C10 H10 N2 O2	4.749	191.081	2.7709e+06	3.42496e+06	1.58658e+06	1.44284e+06	2.55076e+06	1.93057e+06	1.60988e+06	1.71986e+06	1.75955e+06	1.80068e+06	3.11435e+06	2.86429e+06	2.25711e+06	2.08279e+06	2.5518e+06	--	--	--	-	-	-	-
Com_5273_pos	--	Trans-Zeatin	C10 H13 N5 O	4.743	220.119	1.33402e+07	1.13951e+07	9.6208e+06	8.61787e+06	1.12599e+07	1.1324e+07	6.7463e+06	6.71924e+06	9.07198e+06	1.00634e+07	1.35007e+07	1.44069e+07	1.01487e+07	1.11252e+07	1.04476e+07	--	--	--	C00371	ko01100//Metabolic pathways;ko01110//Biosynthesis of secondary metabolites;ko04075//Plant hormone signal transduction;ko00908//Zeatin biosynthesis	Global and overview maps;Metabolism of terpenoids and polyketides;Signal transduction	Environmental Information Processing;Metabolism
Com_7630_pos	Heteroclitin D	--	C27 H30 O8	5.07	483.209	1.39343e+06	2.53504e+06	3.22105e+06	1.92515e+06	7.05351e+06	6.96725e+06	3.83264e+06	1.90987e+06	3.95769e+06	888823	2.79767e+06	2.47278e+06	5.15681e+06	4.69565e+06	4.9736e+06	--	--	--	-	-	-	-
Com_13940_pos	--	Roseoside	C19 H30 O8	5.056	387.202	597600	1.05813e+06	1.05828e+06	1.45242e+06	979643	1.25701e+06	1.33062e+06	938995	1.149e+06	1.73912e+06	1.50508e+06	841108	1.42328e+06	1.62234e+06	936504	--	--	--	-	-	-	-
Com_596_pos	WMH	--	C22 H28 N6 O4 S	5.483	473.199	8.18387e+07	8.46187e+07	7.07706e+06	1.56512e+08	1.68982e+08	1.51285e+08	1.61729e+08	1.37593e+08	1.71114e+08	2.10015e+08	1.76577e+08	1.89696e+08	1.53399e+08	1.56295e+08	1.71298e+08	--	--	--	-	-	-	-
Com_193_pos	1,2-dihydroxyheptadec-16-yn-4-yl acetate	--	C19 H34 O4	7.807	349.234	4.84511e+08	4.79617e+08	6.06881e+08	5.76897e+08	1.3013e+08	2.49936e+08	4.81905e+07	2.24916e+08	4.36214e+08	4.47026e+08	2.88033e+08	2.91302e+08	3.56911e+08	3.86685e+08	3.94445e+08	--	--	--	-	-	-	-
Com_10243_pos	Triptolide	--	C20 H24 O6	4.769	361.16	2.24208e+06	2.1224e+06	1.74688e+06	2.11963e+06	3.99697e+06	2.50058e+06	1.85678e+06	1.53537e+06	2.13645e+06	1.83942e+06	3.22791e+06	2.95612e+06	1.87946e+06	2.21922e+06	2.48065e+06	Bi- and oligothiophenes	1222-83-9	HMDB0038459	-	-	-	-
Com_7056_pos	Gitogenin	--	C27 H44 O4	6.899	433.331	4.90665e+06	5.05601e+06	7.20642e+06	6.8015e+06	3.01975e+06	2.15105e+06	1.92285e+06	2.19537e+06	3.47173e+06	2.58457e+06	1.60331e+06	1.87427e+06	2.91345e+06	2.57837e+06	3.10721e+06	--	--	--	-	-	-	-
Com_5218_pos	Byakangelicol	--	C17 H16 O6	5.006	317.099	1.31942e+07	1.22683e+07	6.76148e+06	6.3559e+06	1.05311e+07	1.24473e+07	7.5071e+06	7.4765e+06	1.25403e+07	1.25301e+07	1.55059e+07	1.48521e+07	1.10598e+07	1.12265e+07	1.09554e+07	--	--	--	-	-	-	-
Com_1512_pos	PE (5:0/5:0)	--	C15 H30 N O8 P	6.063	384.183	3.20603e+06	3.25715e+06	6.19675e+07	5.94441e+07	1.84372e+06	1.99169e+06	2.19299e+06	2.25688e+06	2.23085e+06	2.16286e+06	3.72398e+06	2.96628e+06	1.12275e+07	1.38379e+07	1.40781e+07	--	--	--	-	-	-	-
Com_2068_pos	4-methyl-5-oxo-2-pentyl-2,5-dihydrofuran-3-carboxylic acid	--	C11 H16 O4	5.275	213.112	2.35304e+07	2.77572e+07	1.36156e+07	1.93391e+07	1.58425e+07	2.65234e+07	2.92294e+07	2.33267e+07	1.51206e+07	1.92101e+07	2.11338e+07	5.41353e+07	2.26563e+07	2.71822e+07	2.01213e+07	--	--	--	-	-	-	-
Com_8133_pos	Byakangelicin	--	C17 H18 O7	5.58	335.112	4.48842e+06	3.59682e+06	2.91649e+06	2.86132e+06	6.07563e+06	6.27725e+06	4.61713e+06	4.45465e+06	3.99835e+06	4.00289e+06	4.89858e+06	4.6164e+06	4.63259e+06	4.47972e+06	4.51301e+06	Coumarins and derivatives	482-25-7	HMDB0030651	-	-	-	-
Com_1109_pos	3,14-dihydro-15-keto-tetranor Prostaglandin E2	--	C16 H26 O5	5.856	321.169	1.04215e+08	9.61035e+07	8.51141e+07	8.41232e+07	7.20075e+07	5.21839e+07	6.61603e+07	6.68836e+07	7.70556e+07	7.78582e+07	8.13053e+07	6.68674e+07	8.78017e+07	8.3699e+07	9.16528e+07	--	--	--	-	-	-	-
Com_16453_pos	Fenoldopam	--	C16 H16 Cl N O3	1.134	306.09	326253	278674	453592	411717	299954	398188	400422	377549	633213	433740	506346	388634	420589	563501	464351	Benzazepines	67227-57-0	HMDB0014938	-	-	-	-
Com_1834_pos	2-[(3S)-1-(4-Chlorobenzyl)-3-pyrrolidinyl]-1-methyl-1H-benzimidazole	--	C19 H20 Cl N3	1.153	326.144	3.39608e+07	2.95949e+07	3.07035e+07	3.07727e+07	2.45657e+07	2.26871e+07	6.10806e+07	5.98299e+07	3.7857e+07	3.86962e+07	3.32165e+07	3.33389e+07	2.92367e+07	3.37672e+07	3.5441e+07	--	--	--	-	-	-	-
Com_6950_pos	Octopine	--	C9 H18 N4 O4	5.162	124.076	5.47694e+06	7.79696e+06	4.85276e+06	5.07597e+06	6.97873e+06	8.13105e+06	8.36864e+06	7.35658e+06	9.29595e+06	8.33199e+06	8.34139e+06	7.83112e+06	5.29146e+06	7.21875e+06	6.93951e+06	--	--	--	C04137	ko02010//ABC transporters;ko00330//Arginine and proline metabolism	Amino acid metabolism;Membrane transport	Environmental Information Processing;Metabolism
Com_3545_pos	8-(1,2-dihydroxy-3-methylbut-3-en-1-yl)-7-methoxy-2H-chromen-2-one	--	C15 H16 O5	5.421	294.133	6.34461e+06	6.20892e+06	3.30213e+06	3.39063e+06	2.24176e+07	2.30759e+07	7.51956e+06	5.79403e+06	4.57852e+06	4.95041e+06	6.22561e+06	5.50972e+06	8.51976e+06	7.0265e+06	9.20873e+06	Coumarins and derivatives	-	HMDB0132703	-	-	-	-
Com_22_pos	Indole-3-acrylic acid	--	C11 H9 N O2	5.088	188.07	2.02661e+09	1.79646e+09	1.38448e+09	1.32483e+09	7.8325e+09	7.75453e+09	2.69058e+09	2.65707e+09	2.78336e+09	2.97709e+09	1.56817e+09	1.62907e+09	3.02555e+09	3.0067e+09	3.23208e+09	--	--	--	-	-	-	-
Com_13203_pos	--	(+)-Anwulignan	C20 H24 O4	6.367	657.34	2.09222e+06	927909	1.75742e+06	1.6521e+06	1.5448e+06	1.09468e+06	1.25559e+06	1.21949e+06	1.15556e+06	966491	1.94595e+06	1.90042e+06	1.19718e+06	912038	1.13443e+06	--	--	--	-	-	-	-
Com_11309_pos	--	Histidine	C6 H9 N3 O2	5.492	156.077	765921	748731	762830	781540	3.15061e+06	2.25172e+06	514065	458210	1.01087e+06	444027	578899	500772	644263	814517	498480	Carboxylic acids and derivatives	71-00-1	HMDB0000177	-	-	-	-
Com_5082_pos	Prostaglandin J2	--	C20 H30 O4	9.515	352.253	1.20553e+06	1.2968e+06	1.31815e+06	1.4765e+06	1.30231e+06	912734	2.29943e+06	2.98729e+06	2.56513e+06	1.37689e+07	1.61797e+07	2.64203e+06	1.5452e+06	2.41802e+06	2.26169e+06	Fatty Acyls	87893-54-7	HMDB0004238	C05957	ko01100//Metabolic pathways;ko00590//Arachidonic acid metabolism	Global and overview maps;Lipid metabolism	Metabolism
Com_16412_pos	Hirsuteine	--	C22 H26 N2 O3	10.454	367.207	420569	561768	363436	317704	203393	302996	235079	194396	321171	341863	297684	383899	232989	330347	330197	--	--	--	-	-	-	-
Com_7749_pos	ethyl 2-(4-oxo-4,5-dihydro-1,3-thiazol-2-yl)acetate	--	C7 H9 N O3 S	4.91	188.037	6.07251e+06	5.93292e+06	6.1325e+06	5.41671e+06	2.63289e+06	3.01196e+06	6.6543e+06	7.23029e+06	5.71485e+06	5.23534e+06	7.91203e+06	7.74346e+06	6.33562e+06	6.41518e+06	6.25048e+06	--	--	--	-	-	-	-
Com_11817_pos	EMK	--	C16 H30 N4 O6 S	5.275	372.166	2.1926e+06	1.17201e+06	1.12863e+06	1.04738e+06	1.90562e+06	2.83131e+06	1.37951e+06	1.99716e+06	2.89785e+06	2.33286e+06	1.73414e+06	1.49089e+06	1.90701e+06	2.10197e+06	1.79833e+06	--	--	--	-	-	-	-
Com_15049_pos	Levistilide A	--	C24 H28 O4	7.36	343.247	1.24346e+06	1.12025e+06	787380	854449	705179	719423	799938	662704	726026	693470	1.00801e+06	666574	738781	1.05499e+06	1.13528e+06	--	--	--	-	-	-	-
Com_12742_pos	--	Cucurbitacin E	C32 H44 O8	7.61	557.311	857029	860274	987243	1.19725e+06	937107	1.9079e+06	938754	1.29432e+06	1.45086e+06	1.63982e+06	2.68721e+06	1.8426e+06	1.17063e+06	1.70974e+06	1.00249e+06	--	--	--	-	-	-	-
Com_592_pos	Avocadyne 1-acetate	--	C19 H34 O4	7.149	309.242	1.29718e+08	1.41586e+08	1.39031e+08	1.6247e+08	5.87009e+07	5.84554e+07	8.18393e+07	8.21828e+07	1.05491e+08	9.17071e+07	7.44842e+07	8.34767e+07	1.0061e+08	1.00048e+08	1.00504e+08	Fatty Acyls	24607-06-5	HMDB0031048	-	-	-	-
Com_12299_pos	P-Acetamidophenyl-b-D-glucuronide	--	C14 H17 N O8	5.206	311.076	837021	688529	1.76253e+06	792353	2.56806e+06	1.40842e+06	1.19602e+06	1.29645e+06	1.41211e+06	1.01326e+06	1.1024e+06	1.14197e+06	1.73366e+06	816587	1.32838e+06	--	--	--	-	-	-	-
Com_5342_pos	Salbutamol (Albuterol)	--	C13 H21 N O3	5.215	258.17	1.19495e+07	1.22166e+07	8.67025e+06	8.64424e+06	9.96773e+06	8.89525e+06	4.08899e+06	6.39505e+06	5.01729e+06	4.64737e+06	7.78851e+06	7.28481e+06	8.55814e+06	8.42804e+06	8.35274e+06	--	--	--	-	-	-	-
Com_452_pos	PE (3:0/16:1)	--	C24 H46 N O8 P	5.264	508.311	2.29937e+08	2.22422e+08	2.12679e+08	2.09034e+08	1.37503e+08	1.36464e+08	2.8388e+08	2.64488e+08	1.86641e+08	1.8726e+08	1.10967e+08	1.08525e+08	1.94345e+08	1.96969e+08	2.00359e+08	--	--	--	-	-	-	-
Com_9063_pos	Terazosin	--	C19 H25 N5 O4	5.506	388.196	5.19741e+06	4.75873e+06	2.79118e+06	3.92174e+06	1.69817e+06	1.52225e+06	2.12141e+06	1.61594e+06	2.05378e+06	1.87682e+06	873658	1.96857e+06	2.89743e+06	2.49679e+06	3.45747e+06	Diazinanes	63590-64-7	HMDB0015293	-	-	-	-
Com_306_pos	gamma-Glutamyltyrosine	--	C14 H18 N2 O6	6.43	311.127	6.61383e+06	5.89894e+06	7.85888e+06	8.37346e+06	3.71753e+08	3.74676e+08	3.58104e+08	3.3335e+08	5.98783e+06	6.0395e+06	4.71083e+07	4.80703e+07	1.27917e+08	1.13721e+08	1.22973e+08	Carboxylic acids and derivatives	7432-23-7	HMDB0011741	-	-	-	-
Com_12826_pos	--	Shionone	C30 H50 O	10.19	427.393	1.04687e+06	1.31673e+06	1.08014e+06	1.1067e+06	962847	999187	2.54676e+06	2.09254e+06	998409	1.01139e+06	616930	624583	979812	1.11918e+06	1.07978e+06	--	--	--	-	-	-	-
Com_2420_pos	Phosphocholine	--	C5 H14 N O4 P	8.288	184.073	8.97662e+06	8.68328e+06	1.42529e+07	1.20133e+07	1.94755e+07	2.20716e+07	2.61009e+07	2.54657e+07	4.06491e+07	4.24861e+07	2.01097e+07	2.29293e+07	2.65027e+07	2.04701e+07	1.94318e+07	Organonitrogen compounds	626852	HMDB0001565	C00588	ko01100//Metabolic pathways;ko00564//Glycerophospholipid metabolism	Global and overview maps;Lipid metabolism	Metabolism
Com_3252_pos	FQH	--	C20 H26 N6 O5	7.907	861.408	1.68527e+07	1.68562e+07	1.23998e+07	9.37363e+06	6.6354e+06	6.77036e+06	2.7177e+07	2.7794e+07	1.43714e+07	1.34396e+07	4.34722e+06	5.04047e+06	1.28884e+07	1.36308e+07	1.32778e+07	--	--	--	-	-	-	-
Com_11956_pos	Cetraxate	--	C17 H23 N O4	4.014	306.165	2.80085e+06	2.09804e+06	2.27162e+06	1.99857e+06	1.38759e+06	1.57179e+06	2.02551e+06	2.32057e+06	2.00043e+06	1.5574e+06	1.58704e+06	1.4449e+06	2.02274e+06	1.69477e+06	1.73877e+06	--	--	--	-	-	-	-
Com_2718_pos	Torasemide	--	C16 H20 N4 O3 S	5.331	349.139	1.65894e+07	1.65084e+07	1.22459e+07	9.54799e+06	3.06463e+07	3.27296e+07	2.26026e+07	1.75052e+07	1.64602e+07	1.67056e+07	2.04081e+07	1.86158e+07	1.74153e+07	2.04129e+07	2.14541e+07	Pyridines and derivatives	56211-40-6	HMDB0014359	-	-	-	-
Com_10524_pos	1-Methyltryptophan	--	C12 H14 N2 O2	5.237	202.086	2.35056e+06	2.0153e+06	1.92406e+06	1.75642e+06	3.7534e+06	3.31702e+06	2.52232e+06	1.62369e+06	1.93968e+06	2.31704e+06	991557	1.69519e+06	1.9139e+06	1.93501e+06	2.28165e+06	--	--	--	-	-	-	-
Com_6635_pos	Vinpocetine	--	C22 H26 N2 O2	6.529	351.205	650224	616279	605906	7.07864e+06	555039	550486	535686	511112	1.01091e+07	8.59163e+06	600862	602234	580391	597503	601624	--	--	--	-	-	-	-
Com_2972_pos	2-[4-(tert-butyl)-2-chlorophenoxy]-3-nitropyridine	--	C15 H15 Cl N2 O3	2.251	307.084	6.65731e+06	6.3915e+06	1.3058e+07	1.00534e+07	561366	653748	6.86848e+06	6.53625e+06	3.26639e+07	2.41587e+07	4.00812e+06	4.28654e+06	8.33265e+06	8.94066e+06	9.30155e+06	--	--	--	-	-	-	-
Com_6112_pos	Phellodendrine	--	C15 H25 N3 Na2 O3	1.373	342.175	8.10337e+06	5.12255e+06	6.46599e+06	6.9221e+06	1.03555e+07	1.00003e+07	5.57868e+06	6.26033e+06	5.94836e+06	6.96889e+06	1.10109e+07	1.09049e+07	9.29351e+06	8.83228e+06	5.03051e+06	--	--	--	-	-	-	-
Com_14884_pos	--	Ganoderiol A	C30 H46 O2	9.148	439.356	1.05362e+06	703984	617148	777087	1.17738e+06	1.29669e+06	901294	1.02016e+06	896817	486817	657797	523263	933884	832666	909157	Prenol lipids	-	HMDB0035326	-	-	-	-
Com_10620_pos	--	Rauwolscine hydrochloride	C21 H27 Cl N2 O3	4.823	391.179	3.1156e+06	2.95009e+06	3.17446e+06	2.37724e+06	3.67409e+06	3.15534e+06	3.24083e+06	3.111e+06	2.86521e+06	3.12859e+06	1.22108e+06	1.16502e+06	2.62545e+06	2.92691e+06	3.13128e+06	--	--	--	-	-	-	-
Com_10550_pos	6-O-(2-Methylbutanoyl)-汐-D-glucopyranosyl 汐-D-glucopyranoside	--	C17 H30 O12	4.639	449.163	1.62191e+06	1.47108e+06	2.04431e+06	1.08378e+06	1.3002e+06	2.06436e+06	1.6309e+06	2.05058e+06	2.41948e+06	2.38041e+06	3.81489e+06	4.21034e+06	1.90423e+06	2.42791e+06	3.06283e+06	--	--	--	-	-	-	-
Com_1274_pos	--	Lysope 14:0	C19 H40 N O7 P	7.716	426.263	6.82987e+07	6.6353e+07	6.80708e+07	6.14009e+07	7.99269e+07	8.2952e+07	7.66864e+07	7.11665e+07	4.84866e+07	4.7585e+07	9.84268e+07	9.67221e+07	6.97218e+07	7.36915e+07	7.0064e+07	--	--	--	-	-	-	-
Com_8439_pos	--	5-Aminolevulinic acid	C5 H9 N O3	1.392	132.065	2.5414e+06	2.20163e+06	1.80897e+06	1.7243e+06	1.8853e+06	1.57082e+06	6.59585e+06	3.7946e+06	2.79499e+06	2.31679e+06	2.44318e+06	2.14001e+06	1.99182e+06	2.57331e+06	2.14438e+06	Carboxylic acids and derivatives	106-60-5	HMDB0001149	C00430	ko01100//Metabolic pathways;ko01110//Biosynthesis of secondary metabolites;ko01120//Microbial metabolism in diverse environments;ko02010//ABC transporters;ko00260//Glycine, serine and threonine metabolism;ko00860//Porphyrin and chlorophyll metabolism	Amino acid metabolism;Global and overview maps;Membrane transport;Metabolism of cofactors and vitamins	Environmental Information Processing;Metabolism
Com_6731_pos	Epitestosterone glucuronide	--	C25 H36 O8	6.618	465.246	7.2082e+06	6.07424e+06	5.01385e+06	4.83714e+06	6.77195e+06	8.78017e+06	6.78863e+06	5.31761e+06	3.32482e+06	5.3696e+06	6.77078e+06	6.27123e+06	6.98713e+06	5.42944e+06	3.99832e+06	Steroids and steroid derivatives	1180-25-2	HMDB0003193	-	-	-	-
Com_4365_pos	Papaverine	--	C20 H21 N O4	5.343	340.162	928326	2.47458e+06	515114	776737	1.95357e+06	1.36355e+06	2.56906e+06	769832	1.96884e+07	4.10334e+06	2.78575e+06	1.73871e+06	988472	960296	748331	Isoquinolines and derivatives	61-25-6	HMDB0015245	C06533	ko01110//Biosynthesis of secondary metabolites;ko00950//Isoquinoline alkaloid biosynthesis	Biosynthesis of other secondary metabolites;Global and overview maps	Metabolism
Com_3952_pos	Picropodophyllotoxin	--	C22 H22 O8	1.365	432.171	2.02466e+07	1.79838e+07	1.12873e+07	1.13422e+07	1.02462e+07	1.02177e+07	1.06225e+07	1.19736e+07	1.60503e+07	1.47365e+07	1.4094e+07	1.47807e+07	1.24073e+07	1.43288e+07	1.58899e+07	Lignan lactones	-	HMDB0031452	-	-	-	-
Com_3760_pos	2-Isopropylaniline	--	C9 H13 N	5.758	154.122	1.43723e+07	1.409e+07	1.60913e+07	1.80513e+07	9.50929e+06	9.41419e+06	1.68207e+07	1.72279e+07	2.06067e+07	1.9941e+07	1.43479e+07	1.49472e+07	1.67042e+07	1.76316e+07	1.66207e+07	--	--	--	-	-	-	-
Com_6802_pos	16,16-Dimethyl prostaglandin A1	--	C22 H36 O4	9.287	387.25	8.20493e+06	8.20749e+06	7.45118e+06	7.32335e+06	3.94401e+06	2.00665e+06	3.36842e+06	1.49599e+06	4.11225e+06	4.29803e+06	3.50257e+06	3.14955e+06	5.74615e+06	5.31213e+06	4.59239e+06	--	--	--	-	-	-	-
Com_7255_pos	Acetyl-汕-methylcholine	--	C8 H17 N O2	1.372	160.133	1.85449e+06	1.33018e+06	1.36455e+06	979499	7.71342e+06	6.77391e+06	3.36643e+06	3.55663e+06	1.88002e+06	2.1485e+06	4.47937e+06	4.9288e+06	2.82118e+06	2.84765e+06	3.86042e+06	--	--	--	-	-	-	-
Com_6617_pos	Atractylenolide I	--	C15 H18 O2	9.66	249.148	6.66819e+06	7.08003e+06	6.00367e+06	7.68046e+06	5.05599e+06	6.73113e+06	4.44511e+06	3.61943e+06	5.09177e+06	4.83226e+06	3.7697e+06	4.1495e+06	5.48083e+06	5.94591e+06	5.00794e+06	--	--	--	-	-	-	-
Com_8747_pos	Neoruscogenin	--	C27 H40 O4	7.068	429.3	4.71094e+06	2.59834e+06	4.88553e+06	3.78508e+06	3.23016e+06	3.2007e+06	2.09101e+06	1.85927e+06	2.83667e+06	3.14751e+06	3.10156e+06	2.73456e+06	3.65098e+06	3.46154e+06	3.02883e+06	--	--	--	-	-	-	-
Com_4509_pos	2-(2-thienyl)-1,3-thiazole-4-carboxylic acid	--	C8 H5 N O2 S2	1.125	249.936	8.64036e+06	7.15864e+06	6.84542e+06	7.09145e+06	9.00674e+06	8.66375e+06	8.64968e+06	1.03184e+07	1.8617e+07	1.41864e+07	8.66595e+06	5.80431e+06	6.74962e+06	8.19437e+06	1.15433e+07	--	--	--	-	-	-	-
Com_5864_pos	Tyr-Tyr	--	C18 H20 N2 O5	4.751	345.144	8.95766e+06	7.25341e+06	9.53915e+06	9.37531e+06	7.59087e+06	7.64422e+06	7.90313e+06	7.38764e+06	9.07798e+06	9.31935e+06	9.57497e+06	7.11827e+06	8.21155e+06	8.45275e+06	8.38433e+06	Carboxylic acids and derivatives	-	HMDB0029117	-	-	-	-
Com_1017_pos	SM (d28:1/12:0)	--	C45 H91 N2 O6 P	10.833	787.668	698388	536977	1.00666e+08	2.04417e+07	1.24887e+06	1.2721e+06	1.64167e+06	1.59115e+06	798508	898032	760601	751177	1.31835e+06	1.28347e+06	1.45916e+06	--	--	--	-	-	-	-
Com_2191_pos	DGTS (2:0/2:0)	--	C14 H25 N O7	5.275	320.17	4.08114e+07	4.213e+07	1.55794e+07	1.62817e+07	2.49635e+07	2.76333e+07	1.18849e+07	1.09499e+07	1.11678e+07	1.40065e+07	1.52402e+07	1.94821e+07	2.47548e+07	2.46334e+07	2.11394e+07	--	--	--	-	-	-	-
Com_5_pos	6,8-dihydroxy-3-(10-hydroxyundecyl)-3,4-dihydro-1H-2-benzopyran-1-one	--	C20 H30 O5	6.874	333.203	3.02738e+09	1.56023e+10	1.14583e+10	1.9087e+10	3.42384e+09	1.31789e+10	4.08778e+09	1.16967e+10	7.16171e+09	4.98186e+09	1.43998e+10	1.35438e+10	9.90722e+09	5.56486e+09	5.79631e+09	--	--	--	-	-	-	-
Com_15378_pos	--	Ganoderic acid A	C30 H44 O7	6.645	517.314	767716	958177	925298	896353	1.08765e+06	494601	617372	801370	662202	738458	697116	756316	678512	660804	821547	Prenol lipids	81907-62-2	HMDB0034931	-	-	-	-
Com_9200_pos	N-Acetyl-L-glutamine	--	C7 H12 N2 O4	1.375	189.087	3.62357e+06	3.68584e+06	2.26822e+06	3.03102e+06	4.19865e+06	3.2758e+06	4.81398e+06	5.01399e+06	5.55455e+06	3.24269e+06	3.84922e+06	3.86067e+06	3.38689e+06	3.45484e+06	3.60283e+06	Carboxylic acids and derivatives	2490-97-3	HMDB0006029	-	-	-	-
Com_14885_pos	--	1-Methyladenine	C6 H7 N5	1.3	321.128	1.32022e+06	1.18299e+06	653949	1.00337e+06	1.10932e+06	1.21996e+06	842667	754345	1.39531e+06	954967	1.37619e+06	1.26225e+06	736819	1.18029e+06	1.17224e+06	Imidazopyrimidines	5142-22-3	HMDB0011599	-	-	-	-
Com_292_pos	PC (14:0e/2:0)	--	C24 H50 N O7 P	9.131	496.339	2.28046e+08	2.2649e+08	3.4765e+08	3.3712e+08	1.51274e+08	1.5652e+08	3.21074e+08	3.01918e+08	3.35529e+08	3.03876e+08	2.36852e+08	2.25807e+08	2.75223e+08	2.59044e+08	2.72532e+08	--	--	--	-	-	-	-
Com_3627_pos	--	Limonin	C26 H30 O8	5.639	471.201	1.06824e+07	7.79401e+06	1.26037e+07	1.32595e+07	5.24372e+06	1.92942e+07	1.66719e+07	1.23872e+07	7.46273e+06	2.12338e+07	2.22598e+07	2.52605e+07	1.23812e+07	1.3764e+07	1.68862e+07	Prenol lipids	1180-71-8	HMDB0035921	-	-	-	-
Com_189_pos	3-methyl-5-oxo-5-(4-toluidino)pentanoic acid	--	C13 H17 N O3	1.346	258.11	5.29309e+08	4.57564e+08	6.25688e+08	2.52285e+08	2.64015e+08	1.37466e+08	3.53868e+08	3.52725e+08	3.39745e+08	1.7434e+08	4.48585e+08	4.63399e+08	3.83556e+08	4.17519e+08	5.67827e+08	--	--	--	-	-	-	-
Com_4899_pos	Euphorbia factor L1	--	C32 H40 O8	5.117	553.275	3.32497e+06	3.39637e+06	1.83535e+06	2.79798e+06	1.35607e+07	1.45663e+07	4.62634e+06	3.09886e+06	5.20257e+06	5.87975e+06	3.99545e+06	3.1943e+06	5.49264e+06	7.16153e+06	7.55983e+06	--	--	--	-	-	-	-
Com_3893_pos	5,6-Dihydro-5-methyluracil	--	C5 H8 N2 O2	1.374	146.092	1.39868e+07	1.03694e+07	1.19398e+07	3.59602e+06	1.516e+07	2.03043e+07	1.24574e+07	3.33579e+06	1.65745e+07	1.77075e+07	1.77815e+07	1.86347e+07	1.47811e+07	1.59835e+07	1.56449e+07	Diazines	696-04-8	HMDB0000079	-	-	-	-
Com_9702_pos	Alisol C 23-acetate	--	C32 H48 O6	9.227	529.349	2.77233e+06	2.96004e+06	2.73169e+06	2.39559e+06	2.19668e+06	2.35394e+06	4.07583e+06	4.77951e+06	2.56853e+06	2.67769e+06	3.8938e+06	3.74377e+06	2.44628e+06	2.16909e+06	4.10328e+06	--	--	--	-	-	-	-
Com_8528_pos	Glycerophosphocholine	--	C8 H20 N O6 P	5.224	236.128	5.5471e+06	1.88008e+06	2.95077e+06	3.71041e+06	5.75651e+06	5.22366e+06	4.26516e+06	4.66802e+06	5.33242e+06	4.55328e+06	4.34897e+06	5.12776e+06	5.32875e+06	4.25353e+06	5.11891e+06	Glycerophospholipids	-	HMDB0011290	C00670	ko00564//Glycerophospholipid metabolism;ko00565//Ether lipid metabolism	Lipid metabolism	Metabolism
Com_2028_pos	TAG (13:0-18:3-18:4)	--	C52 H86 O6	7.537	829.632	2.06239e+07	2.02764e+07	3.74936e+07	4.16044e+07	1.60761e+07	1.71946e+07	2.5387e+07	2.75946e+07	2.96278e+07	2.91572e+07	1.52288e+07	1.76026e+07	2.69226e+07	2.46884e+07	2.77886e+07	--	--	--	-	-	-	-
Com_13909_pos	PC (3:0/16:3)	--	C27 H48 N O8 P	9.219	546.32	588820	703968	912771	1.46371e+06	854707	764697	921362	1.10335e+06	1.52874e+06	1.08526e+06	728660	722947	888561	843255	800589	--	--	--	-	-	-	-
Com_66_pos	Hexadecanamide	--	C16 H33 N O	9.701	256.263	1.03415e+09	9.60314e+08	1.72799e+09	1.59092e+09	1.54978e+09	1.32235e+09	2.09619e+09	2.4075e+09	1.72681e+09	1.85974e+09	1.24377e+09	1.17958e+09	1.91338e+09	1.96578e+09	1.99548e+09	Fatty Acyls	629-54-9	HMDB0012273	-	-	-	-
Com_1151_pos	2-hydroxy-6-[(8Z,11Z)-pentadeca-8,11,14-trien-1-yl]benzoic acid	--	C22 H30 O3	10.113	303.229	8.23128e+07	7.87457e+07	7.94282e+07	7.70702e+07	9.6841e+07	8.89248e+07	6.72353e+07	8.21551e+07	6.06e+07	5.91837e+07	5.78184e+07	5.62985e+07	8.08823e+07	7.59146e+07	1.02714e+08	--	--	--	-	-	-	-
Com_6660_pos	--	Danshenol C	C21 H20 O4	6.157	337.143	4.48403e+06	6.05565e+06	6.19742e+06	4.3775e+06	6.19381e+06	7.00334e+06	1.00877e+07	7.76893e+06	5.23852e+06	2.65101e+06	8.04783e+06	7.15503e+06	7.03593e+06	6.22327e+06	6.34364e+06	--	--	--	-	-	-	-
Com_9704_pos	--	Suberosin	C15 H16 O3	5.686	245.117	1.63533e+06	2.17496e+06	2.43328e+06	2.29304e+06	4.46916e+06	4.13405e+06	4.37154e+06	3.68228e+06	1.8552e+06	2.03591e+06	2.38905e+06	2.22208e+06	3.49672e+06	2.22103e+06	2.60528e+06	--	--	--	-	-	-	-
Com_7795_pos	7-Ethyl-10-Hydroxy-Camptothecin	--	C22 H20 N2 O5	5.288	393.152	2.56622e+06	4.59647e+06	3.57668e+06	3.03109e+06	5.73961e+06	6.37751e+06	3.70628e+06	5.26254e+06	4.07388e+06	5.49778e+06	5.45087e+06	7.65633e+06	4.6631e+06	6.76364e+06	4.3238e+06	--	--	--	-	-	-	-
Com_6877_pos	SB 205607	--	C23 H24 N2 O	4.697	345.194	8.62944e+06	690945	5.51916e+06	4.75786e+06	4.88669e+06	4.53508e+06	5.40048e+06	5.17538e+06	4.32119e+06	5.10219e+06	5.52214e+06	5.05229e+06	4.8889e+06	5.613e+06	5.63027e+06	--	--	--	-	-	-	-
Com_10742_pos	--	D-Gluconic acid	C6 H12 O7	1.115	197.066	3.15014e+06	3.21802e+06	2.78326e+06	2.12323e+06	3.30576e+06	2.93255e+06	2.97475e+06	3.372e+06	3.7051e+06	3.93649e+06	3.6237e+06	3.22799e+06	2.92671e+06	3.15552e+06	2.96669e+06	Organooxygen compounds	526-95-4	HMDB0000625	C00257	ko01100//Metabolic pathways;ko01110//Biosynthesis of secondary metabolites;ko01120//Microbial metabolism in diverse environments;ko01130//Biosynthesis of antibiotics;ko01200//Carbon metabolism;ko00030//Pentose phosphate pathway	Carbohydrate metabolism;Global and overview maps	Metabolism
Com_1556_pos	LPC 16:3	--	C24 H44 N O7 P	5.233	490.301	5.69737e+07	5.78623e+07	4.79722e+07	4.1304e+07	3.48899e+07	6.68461e+07	6.84389e+07	6.63403e+07	5.06122e+07	5.63905e+07	3.72192e+07	4.95713e+07	5.34637e+07	5.21636e+07	5.47774e+07	--	--	--	-	-	-	-
Com_14847_pos	1-methyl-3,5-di(1-naphthylmethylidene)piperidin-4-one	--	C28 H23 N O	5.095	390.18	1.33095e+06	1.09692e+06	661115	870321	572007	459555	1.14418e+06	944865	375822	547187	865435	614996	961774	1.11314e+06	1.01171e+06	--	--	--	-	-	-	-
Com_10615_pos	Pyridostigmine	--	C9 H12 N2 O2	4.613	181.097	2.60815e+06	2.22993e+06	1.53787e+06	1.3789e+06	2.20416e+06	2.16892e+06	1.88521e+06	2.12454e+06	1.85028e+06	2.08025e+06	3.57615e+06	4.14398e+06	2.35746e+06	1.67182e+06	2.82148e+06	Pyridines and derivatives	155-97-5	HMDB0014685	-	-	-	-
Com_4022_pos	Phellamurin	--	C26 H30 O11	5.455	519.185	9.11725e+06	8.81685e+06	1.72277e+07	1.65188e+07	1.17227e+07	1.09059e+07	1.48564e+07	1.11722e+07	9.05089e+06	9.6859e+06	2.04923e+07	2.20224e+07	1.66333e+07	1.59745e+07	1.29162e+07	Fatty Acyls	117861-55-9	HMDB0031876	-	-	-	-
Com_6158_pos	10-Camphorsulfonic acid	--	C10 H16 O4 S	5.348	233.081	7.75331e+06	6.71278e+06	7.00678e+06	6.6203e+06	5.49703e+06	4.72247e+06	7.41841e+06	5.21648e+06	7.86518e+06	6.27726e+06	8.45456e+06	1.15393e+07	5.42249e+06	6.92442e+06	6.95096e+06	--	--	--	-	-	-	-
Com_10147_pos	PC (6:0/7:0)	--	C21 H42 N O8 P	5.429	468.278	2.31976e+06	2.38166e+06	3.64078e+06	2.92452e+06	1.27398e+06	1.44495e+06	1.80931e+06	1.54831e+06	2.4116e+06	2.68475e+06	837554	1.08233e+06	1.32796e+06	1.62238e+06	2.04932e+06	--	--	--	-	-	-	-
Com_5302_pos	PE (2:0/16:3)	--	C23 H40 N O8 P	6.409	490.256	1.74567e+06	1.07012e+06	1.27222e+06	2.02617e+06	3.33057e+06	2.67472e+06	3.21334e+06	3.02097e+06	2.13776e+06	1.73577e+06	1.50815e+07	5.44891e+06	2.72213e+06	2.59831e+06	2.60514e+06	--	--	--	-	-	-	-
Com_6017_pos	Xanthotoxin	--	C12 H8 O4	1.116	217.055	1.08031e+07	1.00352e+07	7.53117e+06	6.56947e+06	9.88011e+06	9.42415e+06	9.47154e+06	1.01304e+07	1.09368e+07	8.94637e+06	9.90073e+06	9.81777e+06	8.94045e+06	8.89893e+06	8.6635e+06	Coumarins and derivatives	298-81-7	HMDB0014693	-	-	-	-
Com_4801_pos	--	Cinnamyl acetate	C11 H12 O2	5.414	177.091	1.0544e+07	1.23885e+07	1.1149e+07	1.27318e+07	1.31189e+07	1.18656e+07	1.08442e+07	9.81983e+06	1.54642e+07	1.53841e+07	1.48379e+07	1.37045e+07	9.02404e+06	1.34753e+07	1.16767e+07	Benzene and substituted derivatives	21040-45-9	HMDB0029699	-	-	-	-
Com_4628_pos	PC (14:1e/3:0)	--	C25 H50 N O7 P	8.924	508.339	5.93254e+06	7.51286e+06	8.14576e+06	7.36929e+06	9.36776e+06	8.27987e+06	1.09331e+07	8.2854e+06	1.75552e+07	1.75482e+07	1.75526e+07	1.71724e+07	8.80373e+06	1.11426e+07	9.75347e+06	--	--	--	-	-	-	-
Com_3337_pos	Thromboxane B2	--	C20 H34 O6	6.411	393.224	1.84193e+07	1.72745e+07	2.08546e+07	2.12211e+07	2.13945e+07	1.70954e+07	1.51116e+07	1.27731e+07	2.03095e+07	1.80316e+07	1.66442e+07	1.49242e+07	1.70872e+07	1.49284e+07	1.81479e+07	Fatty Acyls	54397-85-2	HMDB0003252	C05963	ko01100//Metabolic pathways;ko00590//Arachidonic acid metabolism	Global and overview maps;Lipid metabolism	Metabolism
Com_9290_pos	--	Cys-Gly	C5 H10 N2 O3 S	4.723	179.048	4.69923e+06	4.1755e+06	3.45164e+06	2.71122e+06	3.717e+06	4.29079e+06	4.07626e+06	3.97226e+06	5.46371e+06	5.23964e+06	5.06723e+06	3.43566e+06	4.58073e+06	4.0306e+06	4.05433e+06	Carboxylic acids and derivatives	19246-18-5	HMDB0000078	C01419	ko01100//Metabolic pathways;ko00480//Glutathione metabolism	Global and overview maps;Metabolism of other amino acids	Metabolism
Com_6872_pos	LPC 17:2	--	C25 H48 N O7 P	8.368	506.324	2.92081e+06	2.91451e+06	2.60981e+06	3.56624e+06	2.7094e+06	3.43178e+06	6.04044e+06	5.72297e+06	9.51814e+06	8.13811e+06	3.45298e+06	6.06905e+06	4.34892e+06	3.63928e+06	3.97161e+06	--	--	--	-	-	-	-
Com_6264_pos	Icariin	--	C33 H40 O15	5.756	677.246	6.57966e+06	5.91616e+06	8.66169e+06	7.60795e+06	4.03545e+06	5.31945e+06	6.47139e+06	6.44799e+06	1.10891e+07	9.81152e+06	4.07517e+06	4.59128e+06	6.96144e+06	6.94844e+06	7.3694e+06	--	--	--	-	-	-	-
Com_3544_pos	Indole-3-propionic acid	--	C11 H11 N O2	5.36	190.086	1.87078e+07	2.20043e+07	1.97917e+07	1.46052e+07	8.40146e+06	9.16606e+06	1.46493e+07	1.1906e+07	1.39453e+07	1.75791e+07	9.85666e+06	1.3036e+07	1.69218e+07	1.55147e+07	1.35922e+07	Indoles and derivatives	830-96-6	HMDB0002302	-	-	-	-
Com_8406_pos	--	Pseudoephedrine	C10 H15 N O	4.614	166.123	3.76332e+06	4.02741e+06	4.67058e+06	5.00264e+06	3.9463e+06	2.65156e+06	3.33208e+06	3.41749e+06	4.84932e+06	5.13438e+06	3.20861e+06	3.29749e+06	3.78843e+06	3.81981e+06	3.72031e+06	Benzene and substituted derivatives	90-82-4	HMDB0001943	C02765	ko01100//Metabolic pathways;ko00360//Phenylalanine metabolism	Amino acid metabolism;Global and overview maps	Metabolism
Com_520_pos	PC (14:1e/2:0)	--	C24 H48 N O7 P	8.451	494.324	5.52827e+07	4.78654e+07	5.08157e+07	4.56618e+07	7.57557e+07	1.51999e+07	1.62381e+07	1.51197e+07	2.4502e+08	1.66916e+08	1.85272e+07	2.11262e+07	2.01087e+07	1.95246e+07	1.83393e+07	--	--	--	-	-	-	-
Com_252_pos	N-[2-chloro-6-(trifluoromethoxy)phenyl]-2,2-dimethylpropanamide	--	C12 H13 Cl F3 N O2	1.243	296.065	4.97182e+08	4.64261e+08	3.81169e+08	3.69424e+08	2.68469e+08	2.61718e+08	2.19764e+08	2.55221e+08	3.44349e+08	3.32893e+08	3.88733e+08	3.64459e+08	3.03797e+08	3.48386e+08	4.04217e+08	--	--	--	-	-	-	-
Com_8930_pos	--	3alpha-Dihydrocadambine	C27 H34 N2 O10	5.134	547.229	362928	304296	439990	513302	5.26493e+06	4.19165e+06	1.13383e+06	1.18672e+06	645180	851135	216770	751295	814460	1.00084e+06	550528	--	--	--	-	-	-	-
Com_5406_pos	Bullatine A	--	C22 H33 N O2	5.407	344.254	1.28029e+07	1.19076e+07	9.8967e+06	9.83796e+06	8.64979e+06	8.3072e+06	1.08909e+07	9.7401e+06	8.56834e+06	8.63582e+06	9.41258e+06	1.00497e+07	9.43764e+06	1.03865e+07	9.6176e+06	--	--	--	-	-	-	-
Com_2447_pos	2-(14,15-Epoxyeicosatrienoyl) glycerol	--	C23 H38 O5	7.362	417.261	2.44457e+07	2.77198e+07	3.38248e+07	2.61946e+07	3.33373e+07	3.4611e+07	2.56956e+07	1.83411e+07	2.6175e+07	2.92534e+07	1.64629e+07	2.32591e+07	1.95116e+07	2.45141e+07	2.98158e+07	Glycerolipids	848667-56-1	HMDB0013651	-	-	-	-
Com_7694_pos	--	Cytosine	C4 H5 N3 O	1.685	112.05	7.0638e+06	3.85323e+06	4.87799e+06	4.00628e+06	3.39946e+06	3.48471e+06	5.11303e+06	5.61979e+06	3.7169e+06	3.87911e+06	5.45494e+06	4.44111e+06	4.33246e+06	4.62486e+06	4.75901e+06	Diazines	71-30-7	HMDB0000630	C00380	ko01100//Metabolic pathways;ko00240//Pyrimidine metabolism	Global and overview maps;Nucleotide metabolism	Metabolism
Com_2199_pos	RLK	--	C18 H37 N7 O4	6.108	398.289	3.84348e+07	3.70745e+07	3.94614e+07	3.64533e+07	9.79771e+06	1.03652e+07	2.27155e+07	2.15694e+07	1.51123e+07	1.27036e+07	1.55994e+07	1.54238e+07	2.49784e+07	2.59323e+07	2.28332e+07	--	--	--	-	-	-	-
Com_1779_pos	2-Phenylacetamide	--	C8 H9 N O	5.463	136.076	2.75963e+07	2.71603e+07	1.47131e+07	1.41884e+07	5.81765e+07	5.73929e+07	2.92947e+07	2.4035e+07	2.38711e+07	2.67828e+07	2.40385e+07	2.13455e+07	3.14143e+07	3.10653e+07	2.96901e+07	Benzene and substituted derivatives	103-81-1	HMDB0010715	C02505	ko01120//Microbial metabolism in diverse environments;ko00360//Phenylalanine metabolism	Amino acid metabolism;Global and overview maps	Metabolism
Com_1551_pos	--	2-Aminoadipic acid	C6 H11 N O4	1.367	162.076	5.03674e+07	4.35428e+07	5.16266e+07	4.80382e+07	6.74129e+07	6.35063e+07	4.56237e+07	3.90925e+07	5.8296e+07	4.96591e+07	4.51803e+07	4.30836e+07	4.56089e+07	5.24831e+07	5.70322e+07	Carboxylic acids and derivatives	542-32-5	HMDB0000510	C00956	ko01100//Metabolic pathways;ko01110//Biosynthesis of secondary metabolites;ko01130//Biosynthesis of antibiotics;ko01230//Biosynthesis of amino acids;ko01210//2-Oxocarboxylic acid metabolism;ko00300//Lysine biosynthesis;ko00310//Lysine degradation	Amino acid metabolism;Global and overview maps	Metabolism
Com_3765_pos	(2E,4E)-N-(2-methylpropyl)deca-2,4-dienamide	--	C14 H25 N O	9.401	224.2	1.46902e+07	1.41116e+07	1.42462e+07	1.27081e+07	1.76445e+07	1.30497e+07	2.3946e+07	2.14178e+07	1.60879e+07	1.14766e+07	1.11203e+07	1.57517e+07	1.68378e+07	1.81395e+07	1.93913e+07	--	--	--	-	-	-	-
Com_15426_pos	Adrenosterone	--	C19 H24 O3	5.15	301.175	1.08325e+06	944639	518253	723102	888542	807126	626032	438141	936700	880433	681534	719190	643090	625401	786034	Steroids and steroid derivatives	382-45-6	HMDB0006772	-	-	-	-
Com_7899_pos	--	Cantharidin	C10 H12 O4	4.91	197.081	4.15156e+06	3.87167e+06	2.85182e+06	3.41252e+06	5.36676e+06	4.99268e+06	4.07025e+06	3.92103e+06	5.46833e+06	3.57306e+06	4.70232e+06	7.4587e+06	5.12681e+06	4.43141e+06	4.40347e+06	--	--	--	-	-	-	-
Com_6511_pos	Talatisamine	--	C24 H39 N O5	7.126	422.289	2.48477e+06	1.98991e+06	2.91709e+06	2.86969e+06	9.38219e+06	9.22868e+06	1.60808e+06	2.11803e+06	1.75411e+06	1.45997e+06	1.67843e+06	1.5193e+06	3.5612e+06	2.80893e+06	3.59643e+06	--	--	--	-	-	-	-
Com_8153_pos	Cephalotaxine	--	C18 H21 N O4	1.355	316.16	4.33904e+06	4.66487e+06	4.24405e+06	3.98889e+06	6.27342e+06	5.46385e+06	3.3433e+06	3.49197e+06	4.2478e+06	4.16123e+06	6.94584e+06	5.99502e+06	4.02494e+06	4.42537e+06	4.19042e+06	--	--	--	-	-	-	-
Com_1562_pos	GPH	--	C13 H19 N5 O4	1.964	332.134	1.2298e+07	7.60849e+06	1.51781e+07	4.65782e+06	4.35019e+07	3.88464e+07	1.93896e+07	1.47529e+07	1.5234e+07	7.86544e+06	1.97923e+07	7.53283e+07	1.70147e+07	3.35441e+07	2.62649e+07	--	--	--	-	-	-	-
Com_3237_pos	4-(anilinomethylidene)-3-methyl-4,5-dihydroisoxazol-5-one	--	C11 H10 N2 O2	3.725	221.092	1.93454e+07	1.96388e+07	1.32169e+07	1.19164e+07	2.46093e+07	2.60014e+07	2.61708e+07	2.15847e+07	1.69939e+07	1.91425e+07	1.94389e+07	1.57913e+07	1.67072e+07	2.0926e+07	1.80554e+07	--	--	--	-	-	-	-
Com_2133_pos	LPE 18:1	--	C23 H46 N O7 P	9.378	480.308	2.60994e+07	2.23535e+07	1.85209e+07	1.84849e+07	1.25665e+07	1.1725e+07	2.84718e+07	2.49285e+07	5.17373e+07	4.94834e+07	3.23889e+07	3.01346e+07	2.76092e+07	2.71982e+07	2.76926e+07	--	--	--	-	-	-	-
Com_3947_pos	1-hydroxy-1-(4-methoxyphenyl)propan-2-yl 4-methoxybenzoate	--	C18 H20 O5	7.141	339.121	873977	880340	789887	730426	1.74992e+07	1.99249e+07	8.0506e+06	7.49442e+06	825089	753408	1.38683e+06	1.67424e+06	5.32511e+06	4.43024e+06	3.96657e+06	--	--	--	-	-	-	-
Com_2277_pos	6-O-Isobutyryl-alpha-D-glucopyranosyl alpha-D-glucopyranoside	--	C16 H28 O12	1.379	430.191	2.38042e+07	2.74571e+07	2.62931e+07	2.96304e+07	4.21026e+07	3.88405e+07	3.19138e+07	2.84422e+07	3.57466e+07	3.73745e+07	3.82108e+07	3.91739e+07	3.67382e+07	3.17464e+07	3.40527e+07	--	--	--	-	-	-	-
Com_5088_pos	Benactyzine	--	C20 H25 N O3	5.235	328.186	1.41581e+07	1.06511e+07	1.03097e+07	7.58215e+06	5.50924e+06	7.28386e+06	7.30522e+06	8.21628e+06	7.39231e+06	7.24352e+06	8.17452e+06	5.69255e+06	6.00524e+06	9.65465e+06	7.60079e+06	--	--	--	-	-	-	-
Com_13400_pos	--	Ginsenoside-Ro	C48 H76 O19	8.338	957.501	341639	343268	389849	317087	583356	970974	1.75892e+06	2.10887e+06	1.79663e+06	1.13249e+06	748761	1.04307e+06	976704	832864	1.24459e+06	--	--	--	-	-	-	-
Com_905_pos	Monensin	--	C36 H62 O11	6.181	693.417	1.00037e+08	8.78799e+07	1.10861e+08	8.72089e+07	1.25582e+08	9.62249e+07	1.04471e+08	9.63306e+07	9.96015e+07	4.32831e+07	1.11118e+08	1.24437e+08	1.11943e+08	9.27122e+07	1.31522e+08	--	--	--	-	-	-	-
Com_5496_pos	--	Coixol	C8 H7 N O3	4.777	166.05	8.12011e+06	7.69517e+06	7.37079e+06	7.44331e+06	1.2338e+07	1.07262e+07	8.41205e+06	8.56032e+06	9.16415e+06	9.37926e+06	1.37891e+07	1.38467e+07	9.06149e+06	8.84057e+06	8.91646e+06	Benzoxazoles	532-91-2	HMDB0036582	-	-	-	-
Com_10028_pos	5-Methoxytryptophol	--	C11 H13 N O2	4.992	192.102	4.22811e+06	2.40743e+06	1.06962e+06	979809	1.69041e+06	1.69392e+06	2.28713e+06	2.37141e+06	3.4176e+06	3.72827e+06	1.97629e+06	1.67332e+06	1.45762e+06	2.14569e+06	2.18971e+06	Indoles and derivatives	712-09-4	HMDB0001896	-	-	-	-
Com_1509_pos	Prunin	--	C21 H22 O10	5.734	435.125	2.82102e+07	2.70207e+07	3.11378e+07	2.98853e+07	1.13786e+07	1.03457e+07	7.92408e+07	7.52684e+07	1.83198e+07	1.96276e+07	1.30203e+07	1.32725e+07	2.37787e+07	2.77061e+07	2.74851e+07	--	--	--	C09099	ko00941//Flavonoid biosynthesis	Biosynthesis of other secondary metabolites	Metabolism
Com_10571_pos	N-Acetyltryptophan	--	C13 H14 N2 O3	4.886	247.111	3.76913e+06	3.35867e+06	1.22868e+06	2.56712e+06	1.26086e+06	1.5136e+06	2.10741e+06	2.8437e+06	1.42507e+06	1.24138e+06	1.94569e+06	1.61659e+06	1.50537e+06	1.62122e+06	2.4432e+06	Carboxylic acids and derivatives	1218-34-4	HMDB0013713	-	-	-	-
Com_16304_pos	--	Notoginsenoside R1	C47 H80 O18	9.828	933.546	107195	125851	187122	130511	143727	209537	457515	696053	446287	169111	166733	155470	215237	139930	260013	Prenol lipids	80418-24-2	HMDB0035363	-	-	-	-
Com_10607_pos	Poricoic acid A	--	C31 H46 O5	10.21	499.339	1.42779e+06	1.61145e+06	1.54341e+06	1.64159e+06	3.32802e+06	3.67097e+06	1.45956e+06	1.40481e+06	937237	823980	800557	758839	1.31967e+06	1.99226e+06	1.79648e+06	--	--	--	-	-	-	-
Com_4988_pos	--	p-Aminocinnamic acid	C9 H9 N O2	4.909	164.07	7.06472e+06	8.6688e+06	3.08685e+06	3.32324e+06	1.34747e+07	1.42247e+07	6.42728e+06	7.02556e+06	6.48052e+06	6.81951e+06	7.57501e+06	7.20361e+06	7.02469e+06	7.83504e+06	7.49354e+06	--	--	--	-	-	-	-
Com_14297_pos	PQH	--	C16 H24 N6 O5	4.671	381.188	1.4288e+06	1.48562e+06	308938	307667	99470.8	125217	946171	992179	472410	433397	1.24304e+06	1.28144e+06	673640	650916	907535	--	--	--	-	-	-	-
Com_4883_pos	2-piperidinobenzoic acid	--	C12 H15 N O2	4.818	206.117	9.03454e+06	7.72984e+06	6.4133e+06	6.43176e+06	3.14936e+06	3.3607e+06	1.44926e+07	1.56702e+07	6.22379e+06	5.33757e+06	8.16783e+06	7.89291e+06	7.82942e+06	8.03766e+06	7.19699e+06	--	--	--	-	-	-	-
Com_2628_pos	trans-4-Phenyl-4-piperidinocyclohexanol	--	C17 H25 N O	2.966	260.197	3.29594e+07	3.28165e+07	2.82275e+07	2.87827e+07	2.2757e+07	1.92076e+07	2.64999e+07	2.5989e+07	1.66347e+07	2.14131e+07	1.81856e+07	2.44481e+07	2.01591e+07	2.2412e+07	2.34202e+07	--	--	--	-	-	-	-
Com_1073_pos	Stercobilin	--	C33 H46 N4 O6	5.519	595.348	1.0148e+08	1.00373e+08	605822	1.1614e+06	2.47399e+06	1.90027e+06	554946	1.09471e+06	650387	899286	2.52849e+06	2.95616e+06	1.91157e+07	1.82439e+07	1.93032e+07	Tetrapyrroles and derivatives	-	HMDB0240259	C05793	ko00860//Porphyrin and chlorophyll metabolism	Metabolism of cofactors and vitamins	Metabolism
Com_347_pos	Isoliensinine	--	C37 H42 N2 O6	6.248	611.303	3.37679e+08	2.91094e+08	7.92897e+07	7.62064e+07	1.81283e+08	1.77898e+08	6.47393e+07	6.37758e+07	7.99757e+07	8.68167e+07	2.09924e+08	2.11573e+08	1.90706e+08	1.66041e+08	1.52757e+08	Isoquinolines and derivatives	6817-41-0	HMDB0033749	-	-	-	-
Com_6758_pos	N-[2-hydroxy-3-(4-methoxyphenoxy)propyl]-2-thiophenecarboxamide	--	C15 H17 N O4 S	1.507	308.097	5.62959e+06	5.66669e+06	6.09349e+06	7.39509e+06	2.29934e+06	2.67077e+06	4.89653e+06	4.77514e+06	6.22262e+06	6.3131e+06	3.38323e+06	3.44058e+06	4.02382e+06	5.21831e+06	5.54056e+06	--	--	--	-	-	-	-
Com_15576_pos	--	N-Caffeoyl putrescine	C13 H18 N2 O3	4.12	251.139	877020	944394	446433	453846	402590	365075	456629	454451	358385	216071	514537	375069	530639	578487	549253	--	--	--	-	-	-	-
Com_7053_pos	PC (6:0/16:3)	--	C30 H54 N O8 P	7.344	588.366	4.9958e+06	2.48433e+06	7.20877e+06	6.27152e+06	2.1571e+06	2.36026e+06	4.26441e+06	4.58414e+06	6.48336e+06	7.45694e+06	7.7752e+06	4.87646e+06	5.45574e+06	4.39131e+06	3.97804e+06	--	--	--	-	-	-	-
Com_3180_pos	20-Dihydro 6汐-methylprednisone	--	C22 H30 O5	7.327	375.213	1.8321e+07	1.89097e+07	2.39205e+07	1.73671e+07	9.94367e+06	9.67718e+06	1.4159e+07	1.34621e+07	1.84446e+07	1.75985e+07	1.36532e+07	1.36498e+07	1.73651e+07	1.52109e+07	1.7514e+07	--	--	--	-	-	-	-
Com_8379_pos	LMH	--	C17 H29 N5 O4 S	5.102	400.195	6.02797e+06	4.7864e+06	2.17521e+06	2.52859e+06	2.59777e+06	2.88703e+06	2.82725e+06	2.22483e+06	3.28659e+06	3.30113e+06	5.5804e+06	5.17627e+06	3.5255e+06	2.47479e+06	4.47355e+06	--	--	--	-	-	-	-
Com_7280_pos	RMH	--	C17 H30 N8 O4 S	6.105	465.209	2.18921e+06	1.81534e+06	4.549e+06	3.37952e+06	5.86367e+06	5.53142e+06	8.60082e+06	7.40242e+06	4.52528e+06	2.83512e+06	7.06748e+06	7.02176e+06	4.81419e+06	4.86476e+06	5.14534e+06	--	--	--	-	-	-	-
Com_10437_pos	3-Isomangostin	--	C24 H26 O6	5.673	411.175	1.81668e+06	932993	1.87406e+06	1.17964e+06	3.1223e+06	2.033e+06	2.1049e+06	3.28242e+06	582863	4.20925e+06	734537	2.8617e+06	1.54249e+06	2.10588e+06	2.90577e+06	Benzopyrans	19275-46-8	HMDB0041521	-	-	-	-
Com_28_pos	LPC 16:2	--	C24 H46 N O7 P	5.292	492.316	4.89612e+09	4.74005e+09	4.59276e+09	4.41626e+09	3.15353e+09	3.25473e+09	6.51619e+09	5.7231e+09	3.39057e+09	3.54295e+09	1.88746e+09	1.9477e+09	4.10258e+09	4.10869e+09	4.20796e+09	--	--	--	-	-	-	-
Com_3070_pos	Docosahexaenoic acid	--	C22 H32 O2	8.976	341.266	1.83848e+07	1.69565e+07	1.40488e+07	1.37934e+07	8.68949e+06	7.94087e+06	9.38558e+06	1.78579e+07	3.06942e+07	3.09604e+07	1.63343e+07	1.10542e+07	1.66472e+07	1.62686e+07	1.49958e+07	Fatty Acyls	6217-54-5	HMDB0002183	C06429	ko01040//Biosynthesis of unsaturated fatty acids	Lipid metabolism	Metabolism
Com_10043_pos	Lawsone	--	C10 H6 O3	1.223	175.036	4.17885e+06	3.88446e+06	3.12921e+06	3.51921e+06	3.93165e+06	4.05762e+06	4.46865e+06	3.85431e+06	4.1399e+06	4.11606e+06	4.57846e+06	4.30648e+06	3.55948e+06	3.99474e+06	3.22835e+06	Naphthalenes	481-39-0	HMDB0030773	-	-	-	-
Com_571_pos	4'-methyl Acetyl fentanyl-d5	--	C22 H23 [2]H5 N2 O	7.469	342.263	1.71238e+08	1.4965e+08	1.65713e+08	1.66976e+08	1.17895e+08	9.51909e+07	7.54781e+07	7.0604e+07	1.75297e+08	1.66898e+08	1.04723e+08	1.31764e+08	1.22618e+08	1.26163e+08	1.19007e+08	--	--	--	-	-	-	-
Com_9909_pos	--	4-O-p-Coumaroylquinic acid	C16 H18 O8	5.907	339.107	2.98357e+06	3.26904e+06	3.81825e+06	2.97683e+06	2.88e+06	2.86508e+06	2.82988e+06	3.4892e+06	3.82917e+06	3.58918e+06	3.24474e+06	3.1259e+06	3.55542e+06	2.66467e+06	3.7713e+06	--	--	--	-	-	-	-
Com_7357_pos	LPE 16:1	--	C21 H42 N O7 P	8.86	452.276	3.39903e+06	3.01247e+06	5.92833e+06	6.37697e+06	3.42848e+06	3.33043e+06	4.11392e+06	4.17189e+06	4.24011e+06	5.28117e+06	4.18848e+06	3.8759e+06	4.0517e+06	4.36148e+06	4.26559e+06	--	--	--	-	-	-	-
Com_3555_pos	N-(1H-benzo[d]imidazol-2-yl)guanidine	--	C8 H9 N5	1.302	176.092	1.05496e+07	1.40263e+07	1.44317e+07	1.48693e+07	4.09002e+06	4.58068e+06	9.08636e+06	1.0153e+07	1.16976e+07	2.54155e+07	7.87015e+06	6.22133e+06	6.51285e+06	1.00693e+07	1.25352e+07	--	--	--	-	-	-	-
Com_1658_pos	Neoline/Bullatine B	--	C24 H39 N O6	5.916	438.284	4.46959e+07	3.70388e+07	5.53729e+07	4.12642e+07	1.15698e+07	7.80445e+06	2.01776e+07	2.18029e+07	3.16836e+07	3.46563e+07	1.16618e+07	1.85775e+07	2.50599e+07	2.31471e+07	2.2233e+07	--	--	--	-	-	-	-
Com_95_pos	Oleoyl ethylamide	--	C20 H39 N O	10.768	310.31	2.39168e+08	2.11123e+08	9.98317e+08	8.4342e+08	1.15482e+09	9.29099e+08	1.57e+09	1.6601e+09	4.60231e+08	5.64804e+08	4.26236e+08	3.87505e+08	1.17599e+09	1.15953e+09	1.18977e+09	--	--	--	-	-	-	-
Com_6532_pos	--	SDMA	C8 H18 N4 O2	1.358	203.15	7.08757e+06	7.63844e+06	6.36319e+06	6.24244e+06	8.81362e+06	7.27966e+06	7.01217e+06	8.18515e+06	8.60625e+06	1.02625e+07	7.52015e+06	8.70394e+06	7.73914e+06	8.14078e+06	8.71239e+06	Carboxylic acids and derivatives	30344-00-4	HMDB0003334	-	-	-	-
Com_15187_pos	--	Vincosamide	C26 H30 N2 O8	4.661	499.21	642683	634054	1.04439e+06	917655	128169	91233.9	194782	144374	834818	761853	416150	283036	495267	380525	612192	--	--	--	-	-	-	-
Com_8349_pos	Ruscogenin	--	C27 H42 O4	9.011	431.313	3.10182e+06	4.67198e+06	3.10099e+06	1.3248e+06	3.4584e+06	5.95438e+06	4.11984e+06	5.09082e+06	4.51602e+06	3.98822e+06	4.92763e+06	2.37939e+06	3.63876e+06	3.95163e+06	3.46966e+06	--	--	--	-	-	-	-
Com_14127_pos	1-[(3S)-3-(1,3-Benzothiazol-2-yl)-1-pyrrolidinyl]-2-phenoxyethanone	--	C19 H18 N2 O2 S	4.013	321.103	760559	724137	604003	560917	1.37423e+06	1.30817e+06	671887	748653	604536	748079	1.89865e+06	1.77751e+06	672524	909586	855357	--	--	--	-	-	-	-
Com_32_pos	2,3-dihydroxypropyl 12-methyltridecanoate	--	C17 H34 O4	7.579	325.236	4.16748e+09	3.63417e+09	4.179e+09	3.94846e+09	2.36854e+09	2.23081e+09	3.22532e+09	3.35855e+09	3.78207e+09	3.59889e+09	2.73159e+09	2.99108e+09	3.28882e+09	3.15168e+09	3.6948e+09	--	--	--	-	-	-	-
Com_7446_pos	Tanshinone IIA	--	C19 H18 O3	4.85	295.129	7.48476e+06	6.60425e+06	4.94299e+06	5.86375e+06	6.32291e+06	5.94358e+06	5.24014e+06	4.22297e+06	4.7784e+06	5.61897e+06	5.84965e+06	5.28807e+06	5.25703e+06	5.43587e+06	5.58515e+06	--	--	--	-	-	-	-
Com_7192_pos	Andrographolide	--	C20 H30 O5	7.351	351.212	6.89911e+06	5.92261e+06	6.58174e+06	6.60796e+06	5.87146e+06	4.38545e+06	6.85406e+06	5.8477e+06	1.25253e+06	6.34861e+06	5.5548e+06	5.48402e+06	6.1799e+06	5.8584e+06	6.63663e+06	--	--	--	-	-	-	-
Com_5833_pos	Prednisolone tebutate	--	C27 H38 O6	6.919	459.271	8.3121e+06	1.06228e+07	8.8334e+06	9.22421e+06	7.86501e+06	5.38649e+06	9.63744e+06	7.88007e+06	1.0196e+07	9.00416e+06	8.62863e+06	1.22494e+07	8.68692e+06	7.90004e+06	9.50723e+06	Steroids and steroid derivatives	50-24-8	HMDB0014998	-	-	-	-
Com_5524_pos	Tetrahydropiperine	--	C17 H23 N O3	5.093	290.171	1.15523e+07	1.16354e+07	9.16096e+06	8.21087e+06	7.12024e+06	6.98655e+06	8.07287e+06	6.69465e+06	8.85497e+06	8.08615e+06	5.92641e+06	7.27369e+06	7.76722e+06	7.38433e+06	8.2516e+06	--	--	--	-	-	-	-
Com_15451_pos	VMK	--	C16 H32 N4 O4 S	4.65	359.211	564221	505407	123162	264372	88579.3	126911	1.11389e+06	1.13041e+06	427070	372316	524445	356545	507858	378352	470133	--	--	--	-	-	-	-
Com_350_pos	1,4-dihydroxyheptadec-16-en-2-yl acetate	--	C19 H36 O4	8.27	311.258	3.33667e+08	3.15189e+08	2.36294e+08	2.67878e+08	9.82849e+07	1.07384e+08	8.43236e+07	7.84877e+07	1.76936e+08	1.6707e+08	1.84241e+08	1.75077e+08	1.80008e+08	1.81828e+08	2.03681e+08	--	--	--	-	-	-	-
Com_4994_pos	--	Irisflorentin	C20 H18 O8	5.578	387.106	1.44691e+07	1.33372e+07	5.37576e+06	3.78121e+06	8.91738e+06	9.66952e+06	7.73216e+06	7.41093e+06	7.45675e+06	8.07121e+06	7.09254e+06	6.5887e+06	6.76346e+06	7.64768e+06	7.44103e+06	--	--	--	-	-	-	-
Com_14825_pos	Sinomenine	--	C19 H23 N O4	10.109	330.164	575510	494779	957258	794793	747135	802060	792143	880923	565704	575625	514147	616796	1.31921e+06	756809	957293	--	--	--	-	-	-	-
Com_1340_pos	Cortisone	--	C21 H28 O5	5.326	361.196	6.69298e+07	6.27701e+07	2.14829e+07	1.98238e+07	7.50089e+07	6.37784e+07	4.57756e+07	4.0603e+07	8.02824e+07	7.59115e+07	8.77326e+07	9.07006e+07	6.00559e+07	6.44377e+07	6.19189e+07	Steroids and steroid derivatives	50-04-4	HMDB0015459	C00762	ko01100//Metabolic pathways	Global and overview maps	Metabolism
Com_7593_pos	PC (22:6e/17:2)	--	C47 H80 N O7 P	10.374	802.569	535259	510389	941973	6.01354e+06	1.14984e+06	1.28878e+06	1.1035e+06	1.24973e+06	924756	887357	781168	863909	1.09533e+06	1.04568e+06	982013	--	--	--	-	-	-	-
Com_9036_pos	Linopirdine	--	C26 H21 N3 O	4.831	392.181	4.78763e+06	4.30073e+06	4.16535e+06	3.13595e+06	5.16294e+06	4.79957e+06	4.97167e+06	4.78173e+06	4.73882e+06	4.93936e+06	1.71557e+06	1.62048e+06	4.05009e+06	3.6394e+06	4.4655e+06	--	--	--	-	-	-	-
Com_2038_pos	3,4-MDMA-d5	--	C11 H10 [2]H5 N O2	7.534	217.158	4.39532e+07	4.22121e+07	3.86697e+07	4.14396e+07	2.7495e+07	3.31181e+07	4.12584e+07	3.96857e+07	3.8083e+07	5.01969e+07	3.99385e+07	3.35206e+07	4.81726e+07	4.34568e+07	4.0911e+07	--	--	--	-	-	-	-
Com_7316_pos	6-(7-methyloctyl)-1H,3H,4H,6H-furo[3,4-c]furan-1-one	--	C15 H24 O3	7.741	253.179	6.48196e+06	6.59822e+06	6.78417e+06	5.88343e+06	3.46855e+06	3.87264e+06	3.87777e+06	3.77712e+06	5.10781e+06	4.95695e+06	4.10069e+06	4.66909e+06	5.49499e+06	5.40384e+06	4.67595e+06	--	--	--	-	-	-	-
Com_8223_pos	Sarracenin	--	C11 H14 O5	4.672	227.091	2.32368e+06	2.51557e+06	1.75921e+06	1.9765e+06	6.1707e+06	5.86431e+06	4.52289e+06	3.87686e+06	2.92568e+06	3.70218e+06	6.29754e+06	5.87772e+06	3.35407e+06	4.39458e+06	4.05565e+06	--	--	--	-	-	-	-
Com_14623_pos	--	Docosanoic acid	C22 H44 O2	10.448	341.341	275526	199765	210605	177053	1.41634e+06	1.3377e+06	1.26418e+06	666346	215729	173417	237549	244281	534881	564609	828356	Fatty Acyls	112-85-6	HMDB0000944	C08281	ko01040//Biosynthesis of unsaturated fatty acids;ko00073//Cutin, suberine and wax biosynthesis	Lipid metabolism	Metabolism
Com_1737_pos	2-{[(4,5-dimethoxy-2-nitrophenethyl)imino]methyl}phenol	--	C17 H18 N2 O5	5.669	331.138	6.01667e+07	5.57877e+07	1.65136e+07	1.23476e+07	1.67195e+07	1.29073e+07	1.44742e+07	1.29803e+07	9.77263e+06	8.83903e+06	9.95833e+06	1.32449e+07	2.06177e+07	2.17682e+07	2.07137e+07	--	--	--	-	-	-	-
Com_13070_pos	Irganox 259	--	C40 H62 O6	10.985	661.428	893784	619040	802601	745581	1.95002e+06	2.12169e+06	671478	889383	516962	448164	576427	468352	915809	707288	846050	--	--	--	-	-	-	-
Com_1808_pos	Convallatoxin	--	C29 H42 O10	8.395	551.282	2.11937e+07	1.76201e+07	1.33283e+07	1.26059e+07	3.56986e+07	3.13783e+07	6.31545e+07	5.67097e+07	6.3853e+07	5.86473e+07	2.80869e+07	1.2078e+07	2.93425e+07	3.39312e+07	3.90452e+07	Steroids and steroid derivatives	5822-57-1	HMDB0034362	-	-	-	-
Com_1423_pos	2-[5-(2-hydroxypropyl)oxolan-2-yl]propanoic acid	--	C10 H18 O4	5.917	225.11	6.34938e+07	5.7072e+07	6.37227e+07	6.01513e+07	5.43936e+07	4.98699e+07	5.76028e+07	5.51658e+07	8.42877e+07	7.66465e+07	5.44328e+07	5.59703e+07	6.116e+07	5.85941e+07	6.28627e+07	--	--	--	-	-	-	-
Com_2992_pos	N-(4-butyl-2-methylphenyl)-N'-[4-(4-methylpiperazino)phenyl]urea	--	C23 H32 N4 O	7.22	381.261	2.21436e+07	2.75445e+07	2.25703e+07	2.32653e+07	6.35913e+06	5.8457e+06	1.44588e+07	1.201e+07	2.34224e+07	1.79085e+07	1.60821e+07	1.34428e+07	1.67321e+07	1.65687e+07	1.85269e+07	--	--	--	-	-	-	-
Com_2342_pos	4-methoxy-6-(prop-2-en-1-yl)-2H-1,3-benzodioxole	--	C11 H12 O3	5.263	193.086	2.15621e+07	1.90727e+07	1.91795e+07	2.88401e+07	3.5436e+07	2.94737e+07	2.571e+07	2.45565e+07	2.43239e+07	2.71655e+07	3.5031e+07	4.54802e+07	2.72774e+07	1.73233e+07	2.57476e+07	--	--	--	-	-	-	-
Com_971_pos	--	1-Monopalmitin	C19 H38 O4	7.422	353.268	3.64898e+07	2.8021e+07	6.78451e+07	6.64775e+07	2.04603e+07	2.23634e+07	1.28994e+08	1.25671e+08	5.30146e+07	5.3068e+07	7.8823e+07	7.85485e+07	6.49634e+07	6.36304e+07	6.78683e+07	Glycerolipids	32899-41-5	HMDB0011564	-	-	-	-
Com_6090_pos	All trans retinal	--	C20 H28 O	9.814	285.221	6.08555e+06	5.07291e+06	5.60803e+06	5.20627e+06	1.04075e+07	8.2258e+06	1.04349e+07	8.71612e+06	8.02489e+06	8.18167e+06	6.01702e+06	5.7743e+06	9.15854e+06	9.41627e+06	8.52605e+06	--	--	--	-	-	-	-
Com_10514_pos	Cimifugin	--	C16 H18 O6	1.379	290.086	2.36495e+06	2.52033e+06	3.35596e+06	2.74307e+06	1.44188e+06	1.51113e+06	2.21943e+06	2.65854e+06	2.5766e+06	1.46561e+06	1.34778e+06	2.16721e+06	2.65108e+06	2.29968e+06	2.25506e+06	--	--	--	-	-	-	-
Com_12552_pos	Deoxyandrographolide	--	C20 H30 O4	5.541	335.223	1.70121e+06	1.86519e+06	1.3858e+06	1.35659e+06	2.08576e+06	1.93598e+06	1.64502e+06	1.55158e+06	1.66471e+06	1.40536e+06	2.81296e+06	2.14874e+06	2.15187e+06	1.92586e+06	2.19576e+06	--	--	--	-	-	-	-
Com_362_pos	2,3-Dinor-11汕-prostaglandin F2汐	--	C18 H30 O5	6.716	349.197	3.08162e+07	2.26901e+08	2.74631e+08	2.73626e+08	1.62158e+08	2.04161e+07	2.83937e+07	2.38898e+08	1.96607e+08	2.89079e+08	2.82114e+08	3.67808e+07	2.65337e+08	2.6294e+08	2.53084e+08	--	--	--	-	-	-	-
Com_59_pos	--	MAG (18:3)	C21 H36 O4	8.074	353.268	7.8067e+08	7.69208e+08	8.45006e+08	7.70022e+08	1.14038e+09	1.12797e+09	2.92562e+09	2.74107e+09	2.08306e+09	2.06655e+09	1.18213e+09	1.23708e+09	1.47961e+09	1.45509e+09	1.37636e+09	--	--	--	-	-	-	-
Com_12878_pos	--	Curcurbitacin IIA	C32 H50 O8	8.374	563.355	1.88467e+06	1.99575e+06	1.37343e+06	1.38632e+06	1.2415e+06	952820	1.96273e+06	2.39034e+06	1.36892e+06	2.12009e+06	1.57319e+06	1.46372e+06	998091	2.03908e+06	2.07967e+06	--	--	--	-	-	-	-
Com_1278_pos	--	N-[(Tert-butoxy)carbonyl]-L-tryptophan	C16 H20 N2 O4	5.492	305.149	3.26765e+07	3.3947e+07	2.37946e+07	1.97517e+07	8.56086e+07	8.05015e+07	3.84774e+07	3.64055e+07	4.17708e+07	4.23013e+07	2.96981e+07	2.89586e+07	4.12454e+07	4.12193e+07	4.34827e+07	--	--	--	-	-	-	-
Com_9798_pos	Artesunate	--	C19 H28 O8	6.071	407.167	3.11777e+06	3.23161e+06	3.11052e+06	3.70206e+06	2.54359e+06	2.63025e+06	2.19533e+06	1.59458e+06	1.57577e+06	2.02479e+06	2.71749e+06	2.91036e+06	2.45198e+06	2.54683e+06	2.03077e+06	Prenol lipids	88495-63-0	HMDB0240267	-	-	-	-
Com_4124_pos	--	Threonyl carbamoyl adenosine	C15 H20 N6 O8	5.074	413.141	1.30867e+07	1.08622e+07	1.19792e+07	1.09022e+07	1.65247e+07	1.63874e+07	1.46763e+07	1.34334e+07	1.59859e+07	1.69146e+07	2.08107e+07	2.12118e+07	1.47096e+07	1.49001e+07	1.59606e+07	--	--	--	-	-	-	-
Com_708_pos	--	5-oxoproline	C5 H7 N O3	1.697	130.05	1.67873e+08	1.34384e+08	1.49399e+07	1.44475e+07	1.39781e+07	1.26092e+07	1.63977e+07	1.52802e+07	6.0618e+07	5.82875e+07	1.07818e+07	1.08863e+07	3.18899e+07	3.68025e+07	3.70775e+07	Carboxylic acids and derivatives	-	HMDB0060262	C01879	ko01100//Metabolic pathways;ko00480//Glutathione metabolism	Global and overview maps;Metabolism of other amino acids	Metabolism
Com_3989_pos	--	Kolavic acid	C20 H30 O4	6.422	335.219	9.83516e+06	1.87859e+07	1.71409e+07	1.56143e+07	1.09885e+07	1.12045e+07	7.39275e+06	1.06281e+07	1.00864e+07	1.64783e+07	1.37969e+07	1.08206e+07	1.09156e+07	1.73388e+07	1.60084e+07	--	--	--	-	-	-	-
Com_6753_pos	--	Coniferin	C16 H22 O8	5.194	343.137	1.77356e+06	2.5379e+06	7.80585e+06	7.40348e+06	2.45661e+06	1.98031e+06	6.0504e+06	5.84996e+06	5.03796e+06	4.51379e+06	3.59705e+06	4.66405e+06	5.46693e+06	5.22546e+06	4.99831e+06	Carbohydrates and carbohydrate conjugates	531-29-3	HMDB0013682	C00761	ko00940//Phenylpropanoid biosynthesis	Biosynthesis of other secondary metabolites	Metabolism
Com_2000_pos	PC (5:0/13:1)	--	C26 H50 N O8 P	7.007	536.334	1.75481e+07	1.80183e+07	3.31959e+07	2.44717e+07	1.18675e+07	6.95154e+06	4.76401e+07	5.24776e+07	4.62122e+07	5.52763e+07	5.4093e+07	5.472e+07	4.16735e+07	3.25016e+07	3.36185e+07	--	--	--	-	-	-	-
Com_5558_pos	Farrerol	--	C17 H16 O5	5.489	301.107	6.20223e+06	6.08035e+06	7.21334e+06	6.35314e+06	4.12185e+06	3.80481e+06	4.97473e+06	5.66118e+06	6.65653e+06	5.74283e+06	9.7928e+06	1.36879e+07	6.82267e+06	5.4764e+06	6.20342e+06	--	--	--	-	-	-	-
Com_5567_pos	Maltotriose	--	C18 H32 O16	1.351	522.202	6.88024e+06	5.822e+06	6.91946e+06	5.86702e+06	1.21164e+07	1.12775e+07	5.00334e+06	5.38557e+06	9.71417e+06	8.07542e+06	8.42385e+06	1.07672e+07	5.62337e+06	7.28383e+06	8.17074e+06	Organooxygen compounds	1109-28-0	HMDB0001262	C01835	ko02010//ABC transporters	Membrane transport	Environmental Information Processing
Com_853_pos	Hecogenin	--	C27 H42 O4	7.498	431.315	7.25e+07	7.50762e+07	1.17505e+08	1.13408e+08	2.90915e+07	2.852e+07	6.70629e+07	5.64318e+07	6.62388e+07	6.90152e+07	5.54915e+07	6.03397e+07	6.85857e+07	7.19107e+07	7.61862e+07	Flavonoids	115921-09-0	HMDB0038824	-	-	-	-
Com_3658_pos	--	Gallic acid	C7 H6 O5	1.52	171.028	1.43476e+07	1.48189e+07	1.70245e+07	1.50648e+07	1.60554e+07	1.4031e+07	1.78862e+07	1.88476e+07	1.93681e+07	1.58405e+07	2.17783e+07	1.93804e+07	1.76712e+07	1.88389e+07	2.31804e+07	Benzene and substituted derivatives	149-91-7	HMDB0005807	C01424	ko01120//Microbial metabolism in diverse environments	Global and overview maps	Metabolism
Com_9135_pos	--	Catharanthine hemitartrate	C25 H30 N2 O8	7.063	487.206	4.17783e+06	4.72755e+06	4.31427e+06	3.46452e+06	4.07335e+06	3.98837e+06	5.40155e+06	4.968e+06	3.23285e+06	3.76788e+06	5.17036e+06	5.3631e+06	4.21188e+06	5.22464e+06	4.10315e+06	--	--	--	-	-	-	-
Com_1728_pos	--	Quercetin-3,4'-O-di-beta-glucopyranoside	C27 H30 O17	5.019	627.156	3.87144e+06	3.7494e+06	1.38891e+06	1.33069e+06	2.79985e+07	2.9405e+07	2.44438e+07	2.13331e+07	2.99844e+06	2.87331e+06	6.66011e+07	6.7128e+07	2.22213e+07	2.10638e+07	2.11418e+07	--	--	--	-	-	-	-
Com_13233_pos	--	18-Nor-4,15-dihydroxyabieta-8,11,13-trien-7-one	C19 H26 O3	7.337	303.195	2.07379e+06	1.90034e+06	1.68421e+06	1.72277e+06	1.44895e+06	1.48615e+06	1.12888e+06	1.18423e+06	1.53606e+06	1.83683e+06	1.44751e+06	1.4571e+06	1.6445e+06	1.87786e+06	1.86057e+06	--	--	--	-	-	-	-
Com_872_pos	Ajugol	--	C15 H24 O9	5.669	371.13	1.19187e+08	1.24715e+08	3.51709e+07	3.29411e+07	2.61584e+07	2.4376e+07	3.37566e+07	3.11766e+07	2.0333e+07	1.96346e+07	2.17526e+07	2.17503e+07	4.51135e+07	4.21039e+07	4.56667e+07	--	--	--	-	-	-	-
Com_1361_pos	Skimmin	--	C15 H16 O8	5.05	325.091	1.85855e+07	1.64424e+07	9.82368e+06	9.26318e+06	7.92309e+07	7.01799e+07	4.62261e+07	4.38099e+07	1.31882e+07	1.15304e+07	8.65103e+07	8.48404e+07	4.43746e+07	4.34145e+07	4.58458e+07	--	--	--	-	-	-	-
Com_1751_pos	--	7-O-Ethylmorroniside	C19 H30 O11	5.439	435.184	5.9745e+07	4.88756e+07	1.64246e+07	1.61853e+07	3.19523e+07	2.61978e+07	2.90383e+07	2.43489e+07	1.62082e+07	1.68511e+07	4.00955e+07	3.95774e+07	3.07946e+07	3.63224e+07	3.36995e+07	--	--	--	-	-	-	-
Com_5977_pos	--	1,11-Undecanedicarboxylic acid	C13 H24 O4	8.895	245.174	6.46201e+06	6.21044e+06	7.26568e+06	7.46926e+06	6.15751e+06	9.11068e+06	6.79073e+06	1.15221e+07	7.51769e+06	6.86777e+06	8.07368e+06	7.53286e+06	9.2674e+06	6.28507e+06	7.98908e+06	Fatty Acyls	505-52-2	HMDB0002327	-	-	-	-
Com_2951_pos	--	Sodium Houttuyfonate	C14 H27 Na O5 S	5.394	331.153	2.42345e+07	2.26917e+07	2.14352e+07	2.50011e+07	1.32104e+07	1.53935e+07	2.39413e+07	2.24084e+07	2.64807e+07	2.04165e+07	2.44602e+07	2.62676e+07	1.75393e+07	2.53159e+07	2.18213e+07	--	--	--	-	-	-	-
Com_7690_pos	--	Cyasterone	C29 H44 O8	6.185	521.308	7.06946e+06	3.91731e+06	5.12238e+06	4.55533e+06	2.51514e+06	1.96041e+06	3.67261e+06	2.04791e+06	4.40177e+06	3.40233e+06	2.561e+06	3.72635e+06	3.70252e+06	3.46358e+06	4.79235e+06	--	--	--	-	-	-	-
Com_5551_pos	--	iP9G	C16 H23 N5 O5	5.575	366.175	3.625e+06	3.06165e+06	3.17767e+06	2.20094e+06	1.17892e+07	1.01065e+07	5.6642e+06	5.93696e+06	6.65937e+06	8.27026e+06	1.3172e+07	1.37181e+07	7.36831e+06	7.20719e+06	6.59161e+06	--	--	--	-	-	-	-
Com_5960_pos	11-dehydro Thromboxane B2	--	C20 H32 O6	6.491	386.252	1.09742e+07	8.75042e+06	7.33256e+06	6.32021e+06	1.03761e+07	9.71105e+06	7.7698e+06	8.87691e+06	8.96589e+06	6.93058e+06	1.19039e+07	1.21927e+07	9.6697e+06	9.05071e+06	8.63279e+06	--	--	--	-	-	-	-
Com_4539_pos	--	Methyl arachidonate	C21 H34 O2	7.792	319.262	9.52856e+06	1.06486e+07	1.03683e+07	8.88354e+06	1.35308e+07	1.40046e+07	6.69808e+06	1.76033e+07	1.34924e+07	1.29485e+07	1.83089e+07	1.44044e+07	1.37001e+07	1.18935e+07	8.00712e+06	Fatty Acyls	2566-89-4	HMDB0062594	-	-	-	-
Com_6724_pos	Picroside I	--	C24 H28 O11	6.041	493.167	6.15828e+06	6.11894e+06	2.89348e+06	4.19727e+06	8.8335e+06	5.687e+06	5.21056e+06	4.46907e+06	4.56803e+06	4.79662e+06	5.23579e+06	5.81946e+06	5.02623e+06	6.19246e+06	5.24539e+06	--	--	--	-	-	-	-
Com_4930_pos	--	DHZROG	C21 H33 N5 O10	4.903	516.231	1.47226e+07	1.23191e+07	1.16729e+07	1.20781e+07	8.28366e+06	7.49099e+06	4.08112e+06	4.83712e+06	1.0189e+07	9.81932e+06	7.18318e+06	5.8962e+06	1.00362e+07	9.89274e+06	1.00748e+07	--	--	--	-	-	-	-
Com_7245_pos	--	LysoPC 16:2	C24 H46 N O7 P	8.813	492.307	4.70884e+06	3.58857e+06	2.92668e+06	4.75656e+06	1.24721e+06	1.62593e+06	7.99022e+06	4.7028e+06	8.40731e+06	8.50778e+06	7.2927e+06	4.63584e+06	5.2888e+06	5.90375e+06	4.23858e+06	--	--	--	-	-	-	-
Com_14883_pos	Vicine	--	C10 H16 N4 O7	5.517	305.113	626638	571318	474525	521183	834235	805736	1.46176e+06	475677	728463	723154	578459	675357	583086	675251	747420	Organooxygen compounds	152-93-2	HMDB0034073	-	-	-	-
Com_9800_pos	Dehydrodiisoeugenol	--	C20 H22 O4	7.344	327.154	2.72611e+06	2.53253e+06	2.30591e+06	1.62302e+06	4.37146e+06	4.31404e+06	2.00184e+06	1.71312e+06	2.98579e+06	3.61375e+06	1.46908e+06	1.97641e+06	2.4134e+06	2.79852e+06	2.56457e+06	--	--	--	-	-	-	-
Com_436_pos	--	DGMG (18:2)	C33 H58 O14	8.559	679.39	6.02766e+07	5.51627e+07	5.03672e+07	4.80738e+07	8.81861e+07	7.81593e+07	2.93053e+08	2.68722e+08	1.82162e+08	1.99051e+08	1.14154e+08	9.55954e+07	1.03252e+08	1.31887e+08	1.20569e+08	--	--	--	-	-	-	-
Com_12714_pos	Diosgenin	--	C27 H42 O3	9.841	397.309	1.50232e+06	2.22054e+06	1.34346e+06	1.75531e+06	1.49695e+06	1.53185e+06	1.0552e+06	1.14697e+06	1.26286e+06	1.31674e+06	1.2018e+06	1.0211e+06	1.4621e+06	1.519e+06	1.53892e+06	--	--	--	-	-	-	-
Com_6915_pos	--	1-O-Palmitoylhexitol	C27 H44 O7	7.496	481.315	5.02856e+06	4.15974e+06	7.49935e+06	3.42251e+06	2.51898e+06	2.43131e+06	3.19966e+06	2.88615e+06	3.17219e+06	3.69022e+06	3.0797e+06	2.92697e+06	3.79981e+06	4.01218e+06	2.9917e+06	--	--	--	-	-	-	-
Com_863_pos	Aurantio-obtusin 汕-D-glucoside	--	C23 H24 O12	5.665	493.133	1.32915e+08	1.26153e+08	1.07549e+08	1.0847e+08	5.16073e+07	5.07285e+07	8.25493e+07	7.61385e+07	1.00967e+08	1.09475e+08	7.71142e+07	7.31203e+07	1.03061e+08	9.42856e+07	9.58914e+07	--	--	--	-	-	-	-
Com_6841_pos	--	Brassinolide	C28 H48 O6	7.906	481.351	4.4591e+06	4.30753e+06	7.64206e+06	5.81543e+06	4.48447e+06	4.0955e+06	6.80812e+06	4.01151e+06	5.72862e+06	7.11655e+06	3.42274e+06	3.55566e+06	5.51927e+06	7.33005e+06	4.7855e+06	Steroids and steroid derivatives	78821-43-9	HMDB0041130	C08814	ko01100//Metabolic pathways;ko01110//Biosynthesis of secondary metabolites;ko04075//Plant hormone signal transduction;ko00905//Brassinosteroid biosynthesis	Global and overview maps;Metabolism of terpenoids and polyketides;Signal transduction	Environmental Information Processing;Metabolism
Com_840_pos	--	6-Paradol	C17 H26 O3	6.062	279.195	1.30241e+08	1.17027e+08	1.04189e+08	1.1485e+08	7.15565e+07	7.51122e+07	6.74494e+07	6.33908e+07	9.31855e+07	1.03833e+08	1.00508e+08	9.24355e+07	1.0541e+08	1.14917e+08	9.61671e+07	Benzene and substituted derivatives	27113-22-0	HMDB0030801	-	-	-	-
Com_8391_pos	Oleanolic acid	--	C30 H48 O3	10.406	457.365	5.34607e+06	4.78365e+06	3.22934e+06	2.98199e+06	5.54403e+06	5.3256e+06	5.9e+06	5.34533e+06	5.58851e+06	6.53036e+06	5.44798e+06	5.26933e+06	4.71098e+06	5.06414e+06	5.19235e+06	Prenol lipids	508-02-1	HMDB0002364	-	-	-	-
Com_1938_pos	gamma-Glutamylleucine	--	C11 H20 N2 O5	5.029	261.144	5.28552e+07	4.93178e+07	4.45021e+07	4.31723e+07	1.99988e+07	1.88798e+07	4.57593e+07	4.61084e+07	2.90621e+07	3.08392e+07	3.4573e+07	3.35127e+07	3.20547e+07	3.64949e+07	3.87418e+07	Carboxylic acids and derivatives	2566-39-4	HMDB0011171	-	-	-	-
Com_7788_pos	Periplocymarin	--	C30 H46 O8	7.444	535.327	5.27734e+06	6.46107e+06	4.93575e+06	4.10073e+06	2.88017e+06	4.13079e+06	2.69215e+06	3.67165e+06	2.34207e+06	3.57822e+06	3.98633e+06	2.95894e+06	3.50627e+06	3.58113e+06	4.22372e+06	--	--	--	-	-	-	-
Com_5007_pos	Secoisolariciresinol diglucoside	--	C32 H46 O16	6.774	687.297	9.55995e+06	9.76371e+06	1.05186e+07	7.21993e+06	4.44507e+06	5.03512e+06	1.59803e+07	1.42961e+07	1.02293e+07	5.32544e+06	7.01444e+06	8.19485e+06	1.19677e+07	1.36432e+07	9.83276e+06	Lignan glycosides	158932-33-3	HMDB0036323	-	-	-	-
Com_1329_pos	Tomelukast	--	C16 H22 N4 O3	5.316	654.369	8.25313e+07	6.8493e+07	5.19621e+07	4.96385e+07	3.02967e+07	3.13781e+07	5.24169e+07	4.44995e+07	5.02294e+07	4.83015e+07	2.66885e+07	2.82392e+07	4.63872e+07	4.52951e+07	4.86587e+07	--	--	--	-	-	-	-
Com_5445_pos	(3R)-4,4-Dimethyl-2-oxotetrahydro-3-furanyl beta-D-glucopyranoside	--	C12 H20 O8	1.3	310.149	5.99189e+06	8.96153e+06	5.58489e+06	7.79026e+06	6.75851e+06	1.03296e+07	1.16968e+07	1.3378e+07	1.2823e+07	1.2608e+07	1.37523e+07	1.38159e+07	6.1845e+06	1.09915e+07	1.14041e+07	--	--	--	-	-	-	-
Com_7114_pos	Ganoderic acid G	--	C30 H44 O8	7.7	533.309	5.56553e+06	7.57359e+06	5.29017e+06	5.50427e+06	7.11028e+06	6.95001e+06	6.16941e+06	5.38983e+06	6.00108e+06	6.9169e+06	5.88396e+06	6.43551e+06	5.42716e+06	6.35167e+06	6.03031e+06	Prenol lipids	98665-22-6	HMDB0035985	-	-	-	-
Com_9136_pos	--	Ziyuglycoside I	C41 H66 O13	9.096	767.454	418767	401759	248639	274533	387411	393041	5.65813e+06	4.98973e+06	1.07827e+06	2.09736e+06	4.08043e+06	3.94497e+06	922476	1.11473e+06	1.07216e+06	--	--	--	-	-	-	-
Com_1457_pos	MGDG (3:0/3:0)	--	C15 H26 O10	1.378	384.185	6.69016e+06	5.94344e+06	2.9659e+06	3.11485e+06	7.05298e+07	7.3035e+07	2.01706e+07	1.83733e+07	6.16161e+06	7.12177e+06	2.0358e+07	1.91096e+07	1.93773e+07	1.90232e+07	2.35112e+07	--	--	--	-	-	-	-
Com_1383_pos	Demethoxycurcumin	--	C20 H18 O5	5.067	339.129	5.99601e+07	5.57399e+07	3.38721e+07	3.21127e+07	4.60377e+07	4.45035e+07	3.53234e+07	3.37601e+07	3.55977e+07	3.55726e+07	8.38226e+07	8.7933e+07	4.57574e+07	4.52715e+07	4.55291e+07	Diarylheptanoids	22608-11-3	HMDB0033801	C17742	ko01110//Biosynthesis of secondary metabolites;ko00945//Stilbenoid, diarylheptanoid and gingerol biosynthesis	Biosynthesis of other secondary metabolites;Global and overview maps	Metabolism
Com_131_pos	--	alpha-Ketoglutaric acid	C5 H6 O5	2.073	147.029	1.02531e+09	8.89107e+08	8.62687e+08	8.43846e+08	8.17351e+08	7.86418e+08	7.52718e+08	8.73574e+08	1.25609e+09	1.20966e+09	1.11729e+09	1.24748e+09	8.763e+08	1.06266e+09	9.98553e+08	Keto acids and derivatives	328-50-7	HMDB0000208	C00026	ko01100//Metabolic pathways;ko01110//Biosynthesis of secondary metabolites;ko01120//Microbial metabolism in diverse environments;ko01130//Biosynthesis of antibiotics;ko01230//Biosynthesis of amino acids;ko01200//Carbon metabolism;ko01210//2-Oxocarboxylic acid metabolism;ko00250//Alanine, aspartate and glutamate metabolism;ko00220//Arginine biosynthesis;ko00630//Glyoxylate and dicarboxylate metabo…	Amino acid metabolism;Carbohydrate metabolism;Global and overview maps;Metabolism of other amino acids	Metabolism
Com_2204_pos	Sucrose	--	C12 H22 O11	5.418	343.117	2.86893e+07	2.82669e+07	2.49616e+07	2.28291e+07	4.37962e+07	4.38589e+07	3.20743e+07	3.09712e+07	3.19792e+07	3.59441e+07	3.46015e+07	4.14579e+07	3.36122e+07	3.80301e+07	3.9222e+07	Organooxygen compounds	57-50-1	HMDB0000258	C00089	ko01100//Metabolic pathways;ko02010//ABC transporters;ko00052//Galactose metabolism;ko00500//Starch and sucrose metabolism	Carbohydrate metabolism;Global and overview maps;Membrane transport	Environmental Information Processing;Metabolism
Com_11263_pos	Loureirin B	--	C18 H20 O5	6.453	317.135	2.04144e+06	2.53667e+06	2.06944e+06	1.96435e+06	1.99472e+06	2.48799e+06	2.74459e+06	3.2599e+06	1.09899e+06	1.35847e+06	1.88484e+06	1.62266e+06	2.48623e+06	2.17205e+06	3.32245e+06	--	--	--	-	-	-	-
Com_4918_pos	Fusidine	--	C31 H48 O6	8.952	534.382	138172	6.51903e+06	4.07016e+06	129117	3.85132e+06	3.86641e+06	6.03288e+06	5.90485e+06	7.94585e+06	5.95686e+06	1.59541e+07	1.64022e+07	9.27979e+06	9.64106e+06	1.09592e+07	Steroids and steroid derivatives	1859240	HMDB0015570	-	-	-	-
Com_1255_pos	--	Ketoisophorone	C9 H12 O2	5.366	153.091	8.37738e+07	7.82885e+07	7.04926e+07	6.69178e+07	8.67766e+07	8.66107e+07	8.04946e+07	6.22452e+07	7.60497e+07	8.46414e+07	1.00977e+08	7.8412e+07	8.46147e+07	7.78808e+07	8.70253e+07	Carbonyl compounds	1125-21-9	HMDB0040216	-	-	-	-
Com_3738_pos	Forskolin	--	C22 H34 O7	6.781	433.221	9.05761e+06	7.79852e+06	1.44259e+07	1.08561e+07	1.94494e+07	2.14111e+07	1.32022e+07	1.21918e+07	8.80241e+06	9.62945e+06	1.16626e+07	9.72539e+06	1.12302e+07	1.29077e+07	1.25665e+07	Benzofurans	3413-15-8	HMDB0032064	-	-	-	-
Com_4205_pos	--	N6-Succinyl Adenosine	C14 H17 N5 O8	4.919	384.115	1.74547e+07	1.60149e+07	1.08436e+07	1.07171e+07	1.37704e+07	1.39678e+07	1.52398e+07	1.50617e+07	1.65316e+07	1.49432e+07	2.02775e+07	2.07548e+07	1.44441e+07	1.4715e+07	1.65366e+07	--	--	--	-	-	-	-
Com_5244_pos	--	(-)-Norepinephrine N-hexoside	C14 H21 N O8	4.975	332.134	7.15985e+06	6.83553e+06	1.1043e+07	1.03043e+07	1.19457e+07	1.32301e+07	1.18984e+07	1.17744e+07	1.27033e+07	1.1809e+07	1.13452e+07	1.18115e+07	1.27267e+07	1.18625e+07	1.20029e+07	--	--	--	-	-	-	-
Com_4839_pos	--	gamma-Glutamylglutamic acid	C10 H16 N2 O7	1.377	277.102	6.02975e+06	6.8187e+06	1.32924e+07	9.3442e+06	1.10886e+07	1.06919e+07	1.1523e+07	9.93861e+06	8.47594e+06	8.94314e+06	8.95544e+06	1.00398e+07	9.55864e+06	8.20172e+06	1.28001e+07	Carboxylic acids and derivatives	1116-22-9	HMDB0011737	-	-	-	-
Com_4692_pos	20(S)-Ginsenoside Ck	--	C36 H62 O8	7.303	645.433	1.5866e+07	1.41394e+07	1.12085e+07	1.04882e+07	7.72534e+06	7.86823e+06	7.23306e+06	6.95672e+06	7.58769e+06	9.58162e+06	7.23313e+06	8.85881e+06	9.15676e+06	8.35786e+06	8.7423e+06	--	--	--	-	-	-	-
Com_3325_pos	--	(S)-Glutamic acid	C5 H9 N O4	5.79	148.06	8.45683e+06	8.20679e+06	8.00565e+06	6.43212e+06	2.48875e+07	2.50952e+07	7.05717e+06	6.8229e+06	8.30774e+06	8.93524e+06	9.09662e+06	7.3901e+06	1.39304e+07	1.50515e+07	1.15062e+07	--	--	--	-	-	-	-
Com_7382_pos	--	Methyl oleate	C19 H36 O2	7.746	297.278	4.83349e+06	5.12159e+06	4.33493e+06	4.17185e+06	5.47158e+06	5.56972e+06	6.80162e+06	6.46283e+06	6.53296e+06	5.41217e+06	7.26972e+06	8.44327e+06	5.88709e+06	4.93126e+06	5.73038e+06	--	--	--	-	-	-	-
Com_5608_pos	Loureirin A	--	C17 H18 O4	5.123	287.123	1.21342e+07	1.08667e+07	2.22783e+06	2.31066e+06	2.49924e+06	2.36731e+06	2.11711e+06	2.46151e+06	3.76772e+06	3.39006e+06	2.43373e+06	2.34595e+06	3.9188e+06	4.12989e+06	4.46353e+06	--	--	--	-	-	-	-
Com_73_pos	--	9,17-Octadecadiene-12,14-diyne-1,11,16-triol	C18 H26 O3	6.194	291.195	1.23161e+09	1.94132e+09	1.63323e+09	1.57238e+09	1.47679e+09	1.40271e+09	1.21536e+09	1.13926e+09	1.48692e+09	1.38986e+09	1.27306e+09	1.4052e+09	1.74751e+09	1.41559e+09	1.66936e+09	--	--	--	-	-	-	-
Com_6211_pos	Sweroside	--	C16 H22 O9	5.076	359.131	8.15917e+06	4.6539e+06	5.93385e+06	6.0888e+06	9.83753e+06	8.66458e+06	9.94836e+06	5.44779e+06	7.04961e+06	1.10835e+07	8.16468e+06	7.43438e+06	8.07769e+06	6.26557e+06	6.98635e+06	--	--	--	-	-	-	-
Com_5476_pos	--	Arctigenin-4'-O-beta-Gentiobioside	C33 H44 O16	5.357	697.271	3.40315e+06	3.61217e+06	1.46032e+06	1.38209e+06	8.96024e+06	1.23307e+07	7.16142e+06	4.49835e+06	5.9333e+06	5.2141e+06	5.26808e+06	3.6044e+06	5.98048e+06	5.70549e+06	7.02348e+06	--	--	--	-	-	-	-
Com_878_pos	7-Methylxanthine	--	C6 H6 N4 O2	1.122	167.059	1.17829e+08	1.01995e+08	7.0898e+07	8.93328e+07	9.33794e+07	9.96673e+07	9.80811e+07	1.07771e+08	1.4538e+08	1.31932e+08	1.17194e+08	9.11436e+07	9.57889e+07	1.05676e+08	1.02564e+08	Imidazopyrimidines	552-62-5	HMDB0001991	C16353	ko01100//Metabolic pathways;ko01110//Biosynthesis of secondary metabolites;ko01120//Microbial metabolism in diverse environments;ko00232//Caffeine metabolism	Biosynthesis of other secondary metabolites;Global and overview maps	Metabolism
Com_3261_pos	19(R)-hydroxy Prostaglandin A2	--	C20 H30 O5	6.599	374.253	2.44398e+07	1.98173e+07	2.26657e+07	2.1859e+07	1.18258e+07	2.68717e+06	2.33311e+07	2.4274e+07	2.50954e+07	2.53221e+07	2.0018e+07	1.71058e+07	2.46562e+07	2.15766e+07	2.35725e+07	--	--	--	-	-	-	-
Com_698_pos	D-(+)-Maltose	--	C12 H22 O11	1.544	365.105	1.30494e+08	1.03905e+08	1.25237e+08	9.79773e+07	1.40136e+08	1.66897e+08	1.69592e+08	1.65507e+08	1.5473e+08	1.38858e+08	1.57199e+08	1.66004e+08	1.11541e+08	1.07198e+08	1.35337e+08	Organooxygen compounds	69-79-4	HMDB0000163	C00208	ko01100//Metabolic pathways;ko02010//ABC transporters;ko00500//Starch and sucrose metabolism	Carbohydrate metabolism;Global and overview maps;Membrane transport	Environmental Information Processing;Metabolism
Com_598_pos	--	Ala-gly	C5 H10 N2 O3	1.307	147.076	1.21198e+08	1.72437e+08	1.10039e+08	9.73029e+07	1.59769e+08	1.78544e+08	1.346e+08	1.76435e+08	1.88994e+08	2.09684e+08	1.95373e+08	1.1239e+08	1.31545e+08	1.71507e+08	1.90081e+08	Carboxylic acids and derivatives	687-69-4	HMDB0006899	-	-	-	-
Com_6524_pos	--	Abscisic acid glucose ester	C21 H30 O9	5.706	427.194	9.48296e+06	8.12599e+06	2.30708e+06	2.28085e+06	5.25634e+06	5.83268e+06	2.37058e+06	2.49024e+06	2.40607e+06	2.41278e+06	3.34333e+06	2.89753e+06	3.86739e+06	5.1792e+06	2.62497e+06	--	--	--	C15970	ko01100//Metabolic pathways;ko01110//Biosynthesis of secondary metabolites;ko00906//Carotenoid biosynthesis	Global and overview maps;Metabolism of terpenoids and polyketides	Metabolism
Com_2745_pos	--	Pterosin G	C14 H18 O3	6.353	235.132	2.72705e+07	2.77864e+07	2.89872e+07	2.65492e+07	2.25354e+07	2.02055e+07	1.60861e+07	1.79506e+07	3.16673e+07	2.08957e+07	1.91171e+07	1.51904e+07	2.29152e+07	2.68964e+07	1.98843e+07	--	--	--	-	-	-	-
Com_9741_pos	--	7beta-Hydroxylathyrol	C20 H30 O5	5.472	351.217	2.87468e+06	4.20753e+06	2.72576e+06	2.6679e+06	4.12121e+06	4.2275e+06	2.80275e+06	3.30761e+06	3.18825e+06	3.24061e+06	4.7e+06	2.58111e+06	3.73273e+06	4.37921e+06	3.44246e+06	--	--	--	-	-	-	-
Com_12124_pos	--	Curculigoside	C22 H26 O11	5.844	467.154	2.38875e+06	2.18144e+06	1.23897e+06	1.05834e+06	1.39375e+06	1.24907e+06	1.17605e+06	873026	1.3436e+06	1.35856e+06	2.7725e+06	3.00118e+06	2.00465e+06	2.0415e+06	1.90862e+06	--	--	--	-	-	-	-
Com_55_pos	--	Denin	C33 H56 O14	8.075	677.371	1.00437e+09	1.03169e+09	1.06916e+09	1.03625e+09	1.48218e+09	1.50717e+09	3.25514e+09	2.98382e+09	1.96083e+09	2.22745e+09	1.67966e+09	1.63271e+09	1.794e+09	1.76542e+09	1.74383e+09	--	--	--	-	-	-	-
Com_271_pos	--	Thymol	C10 H14 O	5.512	151.112	3.37997e+08	7.67738e+07	2.45941e+08	2.57194e+08	4.44024e+07	4.20818e+08	3.4095e+08	2.66236e+08	3.07838e+08	3.39914e+08	5.78571e+07	5.58288e+07	3.30461e+08	4.46353e+08	3.73748e+08	Prenol lipids	89-83-8	HMDB0001878	-	-	-	-
Com_209_pos	(+/-)12(13)-DiHOME	--	C18 H34 O4	8.436	297.242	5.97556e+08	5.89473e+08	3.94404e+08	4.42924e+08	1.62876e+08	1.49923e+08	2.6905e+08	2.63551e+08	2.16605e+08	2.1677e+08	2.87081e+08	2.84334e+08	2.68665e+08	3.12497e+08	3.47378e+08	--	--	--	-	-	-	-
Com_4607_pos	Medicagenic acid	--	C30 H46 O6	8.114	503.336	1.31002e+07	1.29383e+07	1.42827e+07	1.26407e+07	1.6054e+07	1.35335e+07	1.32117e+07	1.11055e+07	1.25469e+07	7.83265e+06	1.71526e+07	1.78334e+07	1.49183e+07	1.53084e+07	8.8099e+06	Prenol lipids	599-07-5	HMDB0034551	-	-	-	-
Com_249_pos	--	3-Amino-4-methylpentanoic acid	C6 H13 N O2	2.725	132.102	1.95196e+08	1.83223e+08	1.99074e+08	1.71878e+08	5.03441e+08	4.32822e+08	1.7134e+08	1.65046e+08	1.76316e+08	1.86222e+08	1.95111e+08	1.91146e+08	2.20305e+08	2.52854e+08	2.44497e+08	Carboxylic acids and derivatives	5699-54-7	HMDB0003640	-	-	-	-
Com_257_pos	LPE 18:2	--	C23 H44 N O7 P	8.813	478.292	2.20178e+08	2.15564e+08	2.7356e+08	2.62333e+08	2.11782e+08	2.18873e+08	5.18475e+08	5.12621e+08	4.05726e+08	5.24105e+08	3.3821e+08	3.42015e+08	3.49879e+08	3.44352e+08	3.24556e+08	--	--	--	-	-	-	-
Com_336_pos	LPE 18:3	--	C23 H42 N O7 P	8.306	476.277	1.17341e+08	1.16439e+08	1.46077e+08	1.34818e+08	2.49834e+08	2.42176e+08	3.19094e+08	3.06449e+08	3.67009e+08	3.79531e+08	2.86576e+08	2.68213e+08	2.4655e+08	2.41563e+08	2.54199e+08	--	--	--	-	-	-	-
Com_5487_pos	Ailanthone	--	C20 H24 O7	4.869	377.159	9.28389e+06	7.44721e+06	5.07891e+06	4.32339e+06	1.08964e+07	1.13968e+07	7.71004e+06	8.39673e+06	8.25978e+06	9.51502e+06	1.42898e+07	1.14568e+07	9.6816e+06	1.03274e+07	8.44676e+06	--	--	--	-	-	-	-
Com_2327_pos	--	Antiarol	C9 H12 O4	5.163	185.081	6.30707e+06	7.4651e+06	1.85319e+07	1.97883e+07	4.08024e+07	2.84671e+07	2.55957e+07	2.10824e+07	2.89191e+07	2.74294e+07	3.25963e+07	2.72601e+07	2.39077e+07	2.46909e+07	2.82596e+07	--	--	--	-	-	-	-
Com_3882_pos	Sauchinone	--	C20 H20 O6	5.402	357.132	3.7485e+06	1.36599e+07	1.68718e+07	1.73057e+07	1.193e+07	1.30402e+07	1.17244e+07	1.16298e+07	8.08151e+06	1.03016e+07	1.16745e+07	1.15777e+07	1.20375e+07	1.3534e+07	1.11602e+07	--	--	--	-	-	-	-
Com_152_pos	--	9-Hydroxy-(10E,12Z,15Z)-Octadecatrienoic Acid	C18 H30 O3	6.774	295.226	9.22424e+08	9.07217e+08	7.51414e+08	6.60163e+08	5.62037e+08	5.03911e+08	8.24317e+08	8.37775e+08	5.79998e+08	6.10977e+08	6.26006e+08	6.41402e+08	7.19393e+08	7.07121e+08	7.0498e+08	--	--	--	-	-	-	-
Com_229_pos	Reserpine	--	C33 H40 N2 O9	9.911	609.269	3.16282e+08	2.73385e+08	4.86682e+08	4.76485e+08	3.19487e+08	3.46546e+08	5.88582e+08	5.5216e+08	5.12982e+08	5.10762e+08	2.92821e+08	2.95984e+08	4.3053e+08	4.06423e+08	3.92033e+08	Yohimbine alkaloids	50-55-5	HMDB0014351	-	-	-	-
Com_12156_pos	--	Riboflavin-5'-monophosphate	C17 H21 N4 O9 P	4.735	457.111	2.67955e+06	2.10209e+06	1.76182e+06	1.37794e+06	1.8552e+06	1.59764e+06	2.01654e+06	2.45814e+06	2.81396e+06	2.29878e+06	1.9372e+06	2.0788e+06	2.37646e+06	2.43196e+06	2.3912e+06	--	--	--	-	-	-	-
Com_2968_pos	Tyrosylalanine	--	C12 H16 N2 O4	5.062	253.118	2.86266e+07	2.77866e+07	2.30966e+07	2.21624e+07	1.30373e+07	1.10863e+07	2.92526e+07	2.94477e+07	1.52589e+07	1.73748e+07	1.47845e+07	1.49968e+07	2.13179e+07	1.88637e+07	2.01998e+07	Carboxylic acids and derivatives	-	HMDB0029098	-	-	-	-
Com_7117_pos	--	Phloretin	C15 H14 O5	5.17	275.091	1.46879e+06	1.28837e+06	1.52657e+06	1.46494e+06	2.61439e+06	2.48783e+06	8.94781e+06	6.47878e+06	2.20972e+06	2.40628e+06	3.22386e+06	3.69674e+06	2.67091e+06	2.88593e+06	2.98312e+06	Linear 1,3-diarylpropanoids	60-82-2	HMDB0003306	C00774	ko01110//Biosynthesis of secondary metabolites;ko00941//Flavonoid biosynthesis	Biosynthesis of other secondary metabolites;Global and overview maps	Metabolism
Com_11719_pos	--	Cyanidin O-rutinoside	C27 H31 O15	4.937	596.173	1.58624e+06	1.55227e+06	2.12819e+06	1.711e+06	2.57526e+06	1.55076e+06	1.75321e+06	2.15259e+06	1.65451e+06	1.3936e+06	3.36125e+06	1.59002e+06	1.18861e+06	1.95372e+06	2.20884e+06	--	--	--	-	-	-	-
Com_42_pos	--	Cinnamic Acid	C9 H8 O2	4.829	149.06	1.93853e+09	1.79359e+09	1.76308e+09	1.65045e+09	3.58448e+09	3.57098e+09	1.69487e+09	1.65285e+09	2.49408e+09	2.46998e+09	1.80814e+09	1.7948e+09	2.17107e+09	2.22084e+09	2.26384e+09	Cinnamic acids and derivatives	621-82-9	HMDB0000567	-	-	-	-
Com_2883_pos	--	m-Cresol	C7 H8 O	7.517	109.065	2.5179e+07	2.62766e+07	2.71874e+07	2.52945e+07	2.12215e+07	2.23159e+07	2.13954e+07	2.65273e+07	2.91931e+07	2.82596e+07	2.6044e+07	2.75817e+07	2.59775e+07	2.92949e+07	3.04639e+07	Phenols	108-39-4	HMDB0002048	C01467	ko01120//Microbial metabolism in diverse environments;ko01220//Degradation of aromatic compounds	Global and overview maps	Metabolism
Com_435_pos	trans-Aconitic acid	--	C6 H6 O6	2.094	175.023	1.98595e+08	1.7806e+08	1.87161e+08	1.81571e+08	1.86729e+08	1.65781e+08	1.82723e+08	1.63892e+08	2.92631e+08	2.49012e+08	2.47954e+08	2.69749e+08	1.74774e+08	2.11241e+08	1.91743e+08	Carboxylic acids and derivatives	4023-65-8	HMDB0000958	C02341	ko00660//C5-Branched dibasic acid metabolism	Carbohydrate metabolism	Metabolism
Com_977_pos	Nor-9-carboxy-汛9-THC	--	C21 H28 O4	7.928	345.203	1.14104e+08	1.11021e+08	7.0191e+07	6.55087e+07	6.25284e+07	6.40935e+07	6.8891e+07	4.99993e+07	9.774e+07	9.23746e+07	8.81074e+07	1.01248e+08	9.51095e+07	9.32651e+07	9.76593e+07	--	--	--	-	-	-	-
Com_4606_pos	--	Methyl Eugenol	C11 H14 O2	5.906	179.106	7.97133e+06	7.40898e+06	5.9141e+06	9.72623e+06	4.60549e+06	4.60211e+06	5.13325e+06	5.02566e+06	1.17582e+07	1.35494e+07	1.8572e+07	1.7661e+07	5.27368e+06	6.46878e+06	6.00083e+06	Benzene and substituted derivatives	93-15-2	HMDB0031864	-	-	-	-
Com_10817_pos	Glycitin	--	C22 H22 O10	1.509	469.103	3.57609e+06	3.00628e+06	2.59709e+06	2.31154e+06	3.27264e+06	2.8135e+06	1.73372e+06	2.11734e+06	3.1339e+06	3.37041e+06	3.32461e+06	2.64888e+06	1.37418e+06	2.6468e+06	2.82145e+06	Isoflavonoids	-	HMDB0002219	C16195	ko00943//Isoflavonoid biosynthesis	Biosynthesis of other secondary metabolites	Metabolism
Com_4623_pos	Tracheloside	--	C27 H34 O12	5.135	568.24	9.07868e+06	7.11731e+06	3.50205e+06	2.82152e+06	1.59595e+07	5.85006e+06	5.80029e+06	5.52136e+06	7.23272e+06	2.58639e+06	3.74294e+06	3.08231e+06	9.90632e+06	1.03411e+07	7.61685e+06	Lignan glycosides	33464-71-0	HMDB0030557	-	-	-	-
Com_39_pos	--	Pheophorbide A	C35 H36 N4 O5	10.514	593.275	1.30556e+09	1.25406e+09	2.89999e+09	2.82626e+09	3.28815e+09	3.34561e+09	4.09515e+09	4.40462e+09	2.82881e+09	2.86905e+09	2.64905e+09	2.73255e+09	3.0986e+09	3.09752e+09	2.99142e+09	--	--	--	C18021	ko01110//Biosynthesis of secondary metabolites;ko00860//Porphyrin and chlorophyll metabolism	Global and overview maps;Metabolism of cofactors and vitamins	Metabolism
Com_1987_pos	--	alpha-Ionone	C13 H20 O	6.607	193.158	4.24656e+07	4.24129e+07	3.74254e+07	4.2816e+07	3.97401e+07	4.17281e+07	1.93432e+07	1.76629e+07	3.95801e+07	3.46877e+07	4.31582e+07	3.83595e+07	3.48994e+07	4.07415e+07	3.8381e+07	Prenol lipids	-	HMDB0059883	-	-	-	-
Com_11645_pos	--	O-p-coumaroyl-O-salicyloyl quinic acid	C23 H22 O10	5.205	459.129	1.56234e+06	1.8598e+06	2.21097e+06	2.15492e+06	2.68133e+06	2.66668e+06	2.45238e+06	2.55377e+06	2.79839e+06	2.98591e+06	3.37766e+06	3.30221e+06	2.95064e+06	2.62596e+06	2.34067e+06	--	--	--	-	-	-	-
Com_6124_pos	--	Aucubin	C15 H22 O9	5.323	347.132	9.49108e+06	8.49616e+06	9.20827e+06	8.16124e+06	2.87575e+06	3.6939e+06	5.52954e+06	4.44576e+06	3.08427e+06	3.539e+06	4.45798e+06	4.9393e+06	4.8094e+06	4.94733e+06	5.47797e+06	Prenol lipids	479-98-1	HMDB0036562	-	-	-	-
Com_14349_pos	--	Phlorizin	C21 H24 O10	5.894	437.143	839446	1.09029e+06	978238	840185	879244	1.12772e+06	630178	933119	805519	792132	1.56617e+06	1.73713e+06	834593	844198	948285	Flavonoids	60-81-1	HMDB0036634	C01604	ko01110//Biosynthesis of secondary metabolites;ko00941//Flavonoid biosynthesis	Biosynthesis of other secondary metabolites;Global and overview maps	Metabolism
Com_1913_pos	--	O-Phospho-L-serine	C3 H8 N O6 P	1.283	186.016	2.55639e+07	2.58571e+07	2.53265e+07	2.45193e+07	5.29224e+07	5.00197e+07	3.14325e+07	3.39588e+07	4.81024e+07	5.00946e+07	4.23435e+07	4.43915e+07	3.28392e+07	3.66631e+07	3.65026e+07	Carboxylic acids and derivatives	17885-08-4	HMDB0001721	C01005	ko01100//Metabolic pathways;ko01120//Microbial metabolism in diverse environments;ko01130//Biosynthesis of antibiotics;ko01230//Biosynthesis of amino acids;ko01200//Carbon metabolism;ko00970//Aminoacyl-tRNA biosynthesis;ko00270//Cysteine and methionine metabolism;ko00260//Glycine, serine and threonine metabolism	Amino acid metabolism;Global and overview maps;Translation	Genetic Information Processing;Metabolism
Com_1601_pos	Aleuritic acid	--	C16 H32 O5	5.664	305.232	4.03043e+07	4.64882e+07	4.51882e+07	4.38473e+07	4.8823e+07	6.46512e+07	5.21256e+07	4.03077e+07	5.34701e+07	5.07468e+07	4.17185e+07	4.56501e+07	5.66204e+07	4.77906e+07	5.27904e+07	--	--	--	-	-	-	-
Com_5721_pos	--	Angeloyl-(+)-gomisin K3	C28 H36 O7	5.948	485.254	1.17487e+07	9.08265e+06	9.77658e+06	7.19196e+06	6.8177e+06	6.56418e+06	7.28067e+06	6.86571e+06	6.69836e+06	8.00138e+06	7.11949e+06	7.32037e+06	8.49421e+06	7.93873e+06	9.96645e+06	--	--	--	-	-	-	-
Com_1597_pos	--	Dihydrojasmone	C11 H18 O	6.135	167.143	4.79646e+07	6.02523e+07	5.18325e+07	5.51577e+07	4.50488e+07	4.41e+07	3.47825e+07	4.70261e+07	5.83231e+07	5.40661e+07	5.02685e+07	5.4728e+07	6.00549e+07	5.84033e+07	5.05246e+07	Carbonyl compounds	1128-08-1	HMDB0031565	-	-	-	-
Com_7514_pos	--	Anacardic Acid	C22 H36 O3	7.727	349.273	3.09254e+06	1.99442e+06	3.89009e+06	2.286e+06	2.79536e+06	7.21721e+06	2.34344e+06	2.36756e+06	2.21908e+06	3.51792e+06	2.03499e+06	1.83336e+06	2.69127e+06	2.79507e+06	2.29272e+06	Benzene and substituted derivatives	103904-74-1	HMDB0033896	-	-	-	-
Com_232_pos	LPC 18:3	--	C26 H48 N O7 P	8.491	518.323	1.23923e+08	1.19846e+08	2.00442e+08	1.87079e+08	4.99184e+08	5.56724e+08	5.52126e+08	3.14345e+08	4.85322e+08	5.02881e+08	2.78452e+08	2.32358e+08	4.87003e+08	2.7329e+08	3.53675e+08	--	--	--	-	-	-	-
Com_9670_pos	--	L-arginino-succinate	C10 H17 N4 O6	1.375	290.123	2.82093e+06	1.97542e+06	2.0591e+06	1.89696e+06	4.40513e+06	4.48554e+06	2.14888e+06	3.35836e+06	2.51799e+06	3.11485e+06	4.55395e+06	3.8174e+06	2.82913e+06	3.39986e+06	3.53882e+06	--	--	--	-	-	-	-
Com_4575_pos	--	Selgin C-hexoside	C22 H22 O12	5.364	479.118	1.73149e+06	1.83138e+06	503401	740065	1.55982e+07	1.61375e+07	9.11932e+06	8.08087e+06	1.04138e+06	956605	3.79575e+06	4.04956e+06	5.31506e+06	5.59123e+06	5.71531e+06	--	--	--	-	-	-	-
Com_842_pos	--	Ganoderic acid C2	C30 H46 O7	7.904	519.33	1.11328e+08	1.13808e+08	1.20655e+08	1.11478e+08	8.8075e+07	9.87518e+07	1.20733e+08	1.10663e+08	1.09835e+08	1.09927e+08	8.71062e+07	9.25908e+07	1.03665e+08	1.06566e+08	1.13357e+08	Prenol lipids	98296-48-1	HMDB0035304	-	-	-	-
Com_9166_pos	--	LysoPC 15:0	C23 H48 N O7 P	8.68	482.323	3.17669e+06	3.41413e+06	2.92475e+06	3.05581e+06	3.74351e+06	2.64865e+06	5.05321e+06	3.89355e+06	5.59131e+06	4.9446e+06	4.0582e+06	3.43928e+06	3.73636e+06	3.64803e+06	3.11216e+06	--	--	--	-	-	-	-
Com_2348_pos	Kurarinone	--	C26 H30 O6	5.481	439.217	1.95782e+07	2.35204e+07	2.33934e+07	2.3983e+07	3.81807e+07	4.00341e+07	2.07553e+07	2.9103e+07	2.0703e+07	2.51252e+07	3.39944e+07	2.72214e+07	2.90767e+07	3.15477e+07	3.00304e+07	--	--	--	-	-	-	-
Com_828_pos	--	methylChrysoeriol C-hexoside	C23 H24 O11	5.957	477.138	1.10787e+08	8.22626e+07	1.00735e+08	1.17516e+08	7.32701e+07	7.6781e+07	9.32531e+07	1.00487e+08	1.23194e+08	1.29338e+08	7.23094e+07	7.1724e+07	1.0404e+08	8.90553e+07	1.01996e+08	--	--	--	-	-	-	-
Com_3324_pos	--	Lactucin	C15 H16 O5	5.424	277.106	4.15395e+06	4.32813e+06	3.41006e+06	4.00069e+06	2.52101e+07	2.5051e+07	9.34329e+06	8.09313e+06	5.3257e+06	5.55467e+06	7.00931e+06	6.30596e+06	9.49532e+06	8.92564e+06	1.03627e+07	Lactones	1891-29-8	HMDB0035814	-	-	-	-
Com_7823_pos	3-[4-methyl-1-(2-methylpropanoyl)-3-oxocyclohexyl]butanoic acid	--	C15 H24 O4	5.917	291.157	5.66751e+06	5.92735e+06	6.02252e+06	4.95213e+06	5.65221e+06	5.37631e+06	6.66919e+06	5.96931e+06	6.43931e+06	5.36303e+06	5.31092e+06	5.14101e+06	5.94339e+06	6.22031e+06	5.88343e+06	--	--	--	-	-	-	-
Com_8183_pos	Flavokawain A	--	C18 H18 O5	6.097	315.122	1.58932e+06	1.764e+06	1.81673e+06	1.84721e+06	6.16052e+06	6.20944e+06	5.04903e+06	4.65349e+06	1.32291e+06	1.51292e+06	6.30878e+06	5.49359e+06	3.85435e+06	3.74047e+06	3.7667e+06	Linear 1,3-diarylpropanoids	3420-72-2	HMDB0033586	-	-	-	-
Com_10983_pos	--	Xanthurenic acid O-hexoside	C16 H17 N O9	3.955	368.097	1.50841e+06	1.54012e+06	1.2927e+06	1.26337e+06	1.47395e+06	1.38372e+06	1.34962e+06	1.49843e+06	2.16388e+06	2.16572e+06	3.06562e+06	3.81541e+06	1.47556e+06	1.34889e+06	1.71254e+06	--	--	--	-	-	-	-
Com_3087_pos	--	Boc-beta-cyano-L-alanine	C9 H14 N2 O4	4.83	451.178	4.74722e+06	5.37609e+06	3.68027e+06	2.35994e+07	5.84455e+06	5.05114e+06	1.09195e+07	1.12761e+07	9.48638e+06	9.66489e+06	4.43722e+06	8.45536e+06	6.70539e+06	7.91787e+06	7.78768e+06	--	--	--	-	-	-	-
Com_2394_pos	Prostaglandin K2	--	C20 H30 O5	5.938	333.203	3.79015e+07	3.72213e+07	2.54774e+07	2.76264e+07	2.19299e+07	1.40759e+07	2.8497e+07	2.31376e+07	3.63818e+07	3.73938e+07	3.23998e+07	3.15216e+07	3.282e+07	2.36982e+07	2.93471e+07	--	--	--	-	-	-	-
Com_6580_pos	--	Wulignan A1	C20 H22 O5	5.17	343.153	7.76557e+06	1.32059e+06	3.11829e+06	7.34582e+06	5.83453e+06	9.14061e+06	2.9645e+06	6.88754e+06	6.83887e+06	7.85361e+06	9.35871e+06	6.21814e+06	8.44664e+06	7.18466e+06	6.75688e+06	--	--	--	-	-	-	-
Com_1459_pos	--	MAG (18:1)	C21 H40 O4	10.132	357.299	4.15701e+07	3.82496e+07	4.59816e+07	4.16862e+07	3.31957e+07	3.62919e+07	8.21802e+07	7.11407e+07	4.72573e+07	4.01279e+07	3.48271e+07	3.54965e+07	4.30667e+07	4.40269e+07	4.90899e+07	--	--	--	-	-	-	-
Com_4975_pos	--	Protocatechuic acid	C7 H6 O4	4.612	155.034	4.68118e+06	3.13803e+06	1.7563e+06	1.76181e+06	1.4335e+07	1.28501e+07	7.29179e+06	7.20511e+06	2.91595e+06	4.95692e+06	1.2811e+07	1.22466e+07	6.21511e+06	6.69375e+06	8.16561e+06	Benzene and substituted derivatives	99-50-3	HMDB0001856	C00230	ko01100//Metabolic pathways;ko01110//Biosynthesis of secondary metabolites;ko01120//Microbial metabolism in diverse environments;ko01130//Biosynthesis of antibiotics;ko01220//Degradation of aromatic compounds;ko00400//Phenylalanine, tyrosine and tryptophan biosynthesis	Amino acid metabolism;Global and overview maps	Metabolism
Com_1999_pos	--	MAG (18:2)	C21 H38 O4	8.905	355.283	4.82702e+06	6.16135e+06	5.08942e+06	5.19504e+06	6.89929e+06	6.04532e+06	5.63834e+07	4.79791e+07	3.0667e+07	2.87719e+07	1.30948e+07	1.48988e+07	1.39747e+07	1.33885e+07	1.37056e+07	--	--	--	-	-	-	-
Com_5110_pos	--	Asp-phe	C13 H16 N2 O5	5.185	281.113	1.28694e+07	1.18454e+07	1.17915e+07	1.07693e+07	1.23998e+07	1.37413e+07	1.46661e+07	1.40731e+07	1.39564e+07	1.52704e+07	1.16296e+07	1.0903e+07	1.24422e+07	1.21458e+07	1.34588e+07	--	--	--	-	-	-	-
Com_2453_pos	--	Nicotinate ribonucleoside	C11 H13 N O6	1.645	256.081	3.57594e+07	3.24121e+07	2.64408e+07	3.19858e+07	3.52541e+07	3.51621e+07	2.56496e+07	2.6444e+07	3.13539e+07	3.07197e+07	2.86773e+07	2.60523e+07	2.7491e+07	3.3144e+07	3.05145e+07	Organooxygen compounds	-	HMDB0006809	-	-	-	-
Com_4499_pos	gamma-Glutamylmethionine	--	C10 H18 N2 O5 S	4.782	279.098	8.00486e+06	7.53314e+06	8.48799e+06	7.31345e+06	1.23163e+07	1.19676e+07	7.15777e+06	9.3711e+06	1.67054e+07	1.83938e+07	5.96818e+06	6.92797e+06	7.75241e+06	1.05025e+07	1.15402e+07	Carboxylic acids and derivatives	17663-87-5	HMDB0034367	-	-	-	-
Com_775_pos	Leucylproline	--	C11 H20 N2 O3	5.044	229.155	1.52354e+08	1.37688e+08	1.15593e+08	1.0822e+08	9.81989e+07	9.68404e+07	9.54354e+07	9.21065e+07	9.00735e+07	8.80076e+07	8.29905e+07	8.11309e+07	1.02126e+08	1.05031e+08	1.05891e+08	Carboxylic acids and derivatives	-	HMDB0011175	-	-	-	-
Com_13857_pos	--	Decursin	C19 H20 O5	5.908	329.137	1.02925e+06	695980	1.06823e+06	537065	982738	728844	1.2795e+06	1.87103e+06	952975	1.32942e+06	1.23189e+06	1.23834e+06	1.15889e+06	943858	1.03645e+06	--	--	--	-	-	-	-
Com_2508_pos	Bisdemethoxycurcumin	--	C19 H16 O4	5.695	309.112	528331	872949	1.02327e+06	677257	3.66485e+07	3.2226e+07	1.727e+07	2.94741e+07	965223	903491	3.17813e+06	3.61026e+06	1.34037e+07	1.25479e+07	1.10522e+07	Diarylheptanoids	24939-16-0	HMDB0002114	C17743	ko01110//Biosynthesis of secondary metabolites;ko00945//Stilbenoid, diarylheptanoid and gingerol biosynthesis	Biosynthesis of other secondary metabolites;Global and overview maps	Metabolism
Com_2852_pos	Mulberrin	--	C25 H26 O6	5.302	423.179	2.64633e+07	2.29927e+07	1.88031e+07	1.74188e+07	3.09137e+07	2.34666e+07	1.55074e+07	1.81242e+07	1.45026e+07	2.75927e+07	2.02562e+07	2.4484e+07	2.50021e+07	2.28552e+07	2.61321e+07	Flavonoids	62949-79-5	HMDB0029507	-	-	-	-
Com_5059_pos	--	Indole-3-Carboxaldehyde	C9 H7 N O	4.846	146.06	1.31581e+07	1.02318e+07	7.49982e+06	7.4766e+06	6.88332e+06	7.33709e+06	1.0746e+07	1.06963e+07	9.26273e+06	9.86983e+06	1.21192e+07	1.58334e+07	8.66934e+06	1.05049e+07	9.86336e+06	Purine nucleosides	58-63-9	HMDB0000195	-	-	-	-
Com_5104_pos	Kukoamine B	--	C28 H42 N4 O6	5.98	531.309	1.04756e+07	7.41009e+06	8.46121e+06	1.17462e+07	3.93227e+06	4.4626e+06	4.36073e+06	7.60433e+06	5.0831e+06	9.44691e+06	2.24005e+06	5.25401e+06	9.78474e+06	1.29971e+07	1.13074e+07	Phenols	-	HMDB0060525	-	-	-	-
Com_10517_pos	--	D-Glucarate	C6 H10 O8	1.099	211.045	3.54234e+06	3.57168e+06	3.05635e+06	2.79373e+06	1.85579e+06	2.49875e+06	2.69627e+06	2.46448e+06	3.27481e+06	3.517e+06	3.67285e+06	2.65758e+06	2.34184e+06	2.02894e+06	2.08298e+06	Organooxygen compounds	25525-21-7	HMDB0000663	C00818	ko01100//Metabolic pathways;ko00053//Ascorbate and aldarate metabolism	Carbohydrate metabolism;Global and overview maps	Metabolism
Com_3411_pos	Glucose 1-phosphate	--	C6 H13 O9 P	1.53	261.037	1.30656e+07	9.64227e+06	2.18741e+07	1.10415e+07	6.63052e+06	5.77844e+06	1.83101e+07	2.0288e+07	1.06134e+07	1.2631e+07	2.06032e+07	2.02988e+07	9.68878e+06	1.1378e+07	1.36837e+07	Organooxygen compounds	59-56-3	HMDB0001586	C00103	ko01100//Metabolic pathways;ko01110//Biosynthesis of secondary metabolites;ko01120//Microbial metabolism in diverse environments;ko01130//Biosynthesis of antibiotics;ko00040//Pentose and glucuronate interconversions;ko00520//Amino sugar and nucleotide sugar metabolism;ko00052//Galactose metabolism;ko00500//Starch and sucrose metabolism;ko00010//Glycolysis / Gluconeogenesis	Carbohydrate metabolism;Global and overview maps	Metabolism
Com_1725_pos	2-Hydroxy-2-methyl-3-buten-1-yl beta-D-glucopyranoside	--	C11 H20 O7	4.615	282.154	4.15095e+07	3.45881e+07	3.56895e+07	2.60468e+07	4.27637e+07	5.17839e+07	2.50548e+07	2.83417e+07	3.74721e+07	4.85042e+07	4.21619e+07	3.53491e+07	3.68789e+07	6.18142e+07	5.02152e+07	--	--	--	-	-	-	-
Com_8463_pos	Ginkgolide C	--	C20 H24 O11	5.395	441.139	3.21519e+06	2.47114e+06	1.94462e+06	3.60244e+06	5.58405e+06	4.753e+06	4.66807e+06	6.24124e+06	5.90564e+06	6.17797e+06	6.52779e+06	5.92741e+06	4.95338e+06	4.04743e+06	3.94248e+06	Prenol lipids	15291-76-6	HMDB0036860	-	-	-	-
Com_15821_pos	Atractyloside A	--	C21 H36 O10	5.246	466.264	606401	473236	781371	620595	695088	731560	661408	667042	742290	446281	701292	717978	794980	798365	606567	--	--	--	-	-	-	-
Com_604_pos	Methyl dihydrojasmonate	--	C13 H22 O3	6.129	245.174	1.53329e+08	1.52062e+08	1.68158e+08	1.4463e+08	1.06993e+08	1.06274e+08	1.02414e+08	9.3823e+07	1.36373e+08	1.33322e+08	1.04982e+08	1.24348e+08	1.26208e+08	1.18978e+08	1.33302e+08	Fatty Acyls	24851-98-7	HMDB0031740	-	-	-	-
Com_2772_pos	Sinapinic acid	--	C11 H12 O5	5.286	207.065	3.25937e+07	2.89797e+07	1.6479e+07	2.52772e+07	1.69927e+07	1.24357e+07	2.16582e+07	1.95759e+07	2.45225e+07	1.39949e+07	2.1957e+07	1.59602e+07	2.77226e+07	1.95522e+07	2.33842e+07	Cinnamic acids and derivatives	530-59-6	HMDB0032616	C00482	ko01100//Metabolic pathways;ko01110//Biosynthesis of secondary metabolites;ko00940//Phenylpropanoid biosynthesis	Biosynthesis of other secondary metabolites;Global and overview maps	Metabolism
Com_429_pos	Palmitic Acid	--	C16 H32 O2	6.229	274.274	1.97888e+08	1.99678e+08	1.59336e+08	1.45075e+08	1.66148e+08	1.55714e+08	2.67432e+08	2.57068e+08	2.33547e+08	2.43145e+08	2.90505e+08	3.06681e+08	2.28509e+08	2.12194e+08	2.14625e+08	Fatty Acyls	57-10-3	HMDB0000220	C00249	ko01100//Metabolic pathways;ko01040//Biosynthesis of unsaturated fatty acids;ko00073//Cutin, suberine and wax biosynthesis;ko00061//Fatty acid biosynthesis;ko00071//Fatty acid degradation;ko00062//Fatty acid elongation;ko01212//Fatty acid metabolism	Global and overview maps;Lipid metabolism	Metabolism
Com_3057_pos	L-Asparagine	--	C4 H8 N2 O3	5.783	133.061	1.86066e+07	2.04639e+07	6.53558e+06	8.00581e+06	2.75074e+07	2.82392e+07	4.77712e+06	4.92907e+06	1.31076e+07	1.28406e+07	6.91182e+06	7.70625e+06	1.25409e+07	1.14126e+07	1.28213e+07	Carboxylic acids and derivatives	70-47-3	HMDB0000168	C00152	ko01100//Metabolic pathways;ko01110//Biosynthesis of secondary metabolites;ko01230//Biosynthesis of amino acids;ko00250//Alanine, aspartate and glutamate metabolism;ko00970//Aminoacyl-tRNA biosynthesis;ko00460//Cyanoamino acid metabolism	Amino acid metabolism;Global and overview maps;Metabolism of other amino acids;Translation	Genetic Information Processing;Metabolism
Com_1159_pos	--	Salicylic acid O-glucoside	C13 H16 O8	5.187	301.092	5.59034e+07	5.62643e+07	8.72904e+07	8.07477e+07	3.47779e+07	3.43035e+07	6.143e+07	5.25488e+07	5.27967e+07	5.92994e+07	5.52555e+07	5.25664e+07	5.62388e+07	5.3423e+07	5.73652e+07	--	--	--	-	-	-	-

## Sheet: all.exp.NEG
Table S1: Metabolites profile at the negative (NEG) ion mode in mulberry plants under deficiency, low and high magnesium (Mg) supply
index	MS2_name	MS1_name	formula	rtmin	mz	CK-1	CK-2	T1-1	T1-2	T2-1	T2-2	T3-1	T3-2	T4-1	T4-2	T5-1	T5-2	QC1	QC2	QC3	Class	CAS	HMDB	C_ID	Pathway	KEGG_B_class	KEGG_A_class
Com_1615_neg	Piceatannol	--	C14 H12 O4	5.892	243.066	2.11531e+07	2.00478e+07	2.43712e+07	2.36611e+07	1.33972e+07	1.40997e+07	1.66664e+07	1.63426e+07	2.44871e+07	2.39703e+07	1.95388e+07	1.89523e+07	1.95496e+07	1.92527e+07	2.07402e+07	Stilbenes	10083-24-6	HMDB0004215	C05901	ko01110//Biosynthesis of secondary metabolites;ko00945//Stilbenoid, diarylheptanoid and gingerol biosynthesis	Biosynthesis of other secondary metabolites;Global and overview maps	Metabolism
Com_7712_neg	L-Tyrosine methyl ester	--	C10 H13 N O3	4.709	194.082	1.93731e+06	2.07335e+06	1.87799e+06	1.72784e+06	1.21129e+06	1.58357e+06	1.05669e+06	951862	1.69406e+06	2.22806e+06	1.48602e+06	1.60165e+06	1.84353e+06	1.54882e+06	1.58514e+06	Carboxylic acids and derivatives	1080-06-4	HMDB0029217	-	-	-	-
Com_541_neg	2-Hydroxyvaleric acid	--	C5 H10 O3	5.451	117.055	1.09543e+08	1.05034e+08	7.67957e+07	7.95026e+06	8.98146e+07	9.49897e+07	7.30481e+07	7.28519e+07	8.41956e+07	8.40574e+07	6.23873e+07	6.86035e+07	7.41467e+07	7.57667e+07	8.93261e+07	Fatty Acyls	617-31-2	HMDB0001863	-	-	-	-
Com_1666_neg	Geniposidic acid	--	C16 H22 O10	5.233	373.114	2.16468e+07	2.02071e+07	1.79656e+07	1.70481e+07	2.17205e+07	2.21649e+07	1.5497e+07	2.20497e+07	2.20595e+07	2.34594e+07	2.61777e+07	2.71203e+07	1.99982e+07	2.15147e+07	2.11753e+07	Prenol lipids	27741-01-1	HMDB0034942	C11673	ko01110//Biosynthesis of secondary metabolites;ko00902//Monoterpenoid biosynthesis	Global and overview maps;Metabolism of terpenoids and polyketides	Metabolism
Com_2227_neg	2-Hydroxyhippuric acid	--	C9 H9 N O4	5.117	194.046	1.14478e+07	1.12802e+07	1.16654e+07	1.1982e+07	1.88154e+07	1.85848e+07	9.65705e+06	8.98268e+06	1.07377e+07	1.35873e+07	7.96914e+06	8.33145e+06	8.96897e+06	1.13215e+07	1.11954e+07	Benzene and substituted derivatives	487-54-7	HMDB0000840	-	-	-	-
Com_792_neg	(±)-Abscisic acid	--	C15 H20 O4	5.777	263.129	4.73769e+07	3.92898e+07	5.89776e+07	6.12033e+07	3.29041e+07	3.38657e+07	5.80161e+07	5.47234e+07	4.59987e+07	4.97228e+07	3.81429e+07	3.68817e+07	4.41261e+07	4.15454e+07	4.33966e+07	--	--	--	-	-	-	-
Com_472_neg	Suberic acid	--	C8 H14 O4	5.551	173.082	1.27986e+08	1.16007e+08	6.74882e+07	5.24378e+07	6.27446e+07	5.85419e+07	5.68656e+07	6.90383e+07	6.929e+07	6.7174e+07	5.19309e+07	5.56119e+07	7.2759e+07	6.78118e+07	7.77674e+07	Fatty Acyls	505-48-6	HMDB0000893	-	-	-	-
Com_674_neg	D-(-)-Ribose	--	C5 H10 O5	1.369	149.045	7.42201e+07	6.97528e+07	4.59004e+07	7.501e+07	3.97208e+07	4.62478e+07	6.28201e+07	5.66193e+07	5.36387e+07	6.51431e+07	6.18201e+07	6.18207e+07	5.87248e+07	5.79807e+07	5.07819e+07	--	--	--	C00121	ko02010//ABC transporters;ko00030//Pentose phosphate pathway	Carbohydrate metabolism;Membrane transport	Environmental Information Processing;Metabolism
Com_364_neg	(±)9(10)-DiHOME	--	C18 H34 O4	7.546	313.238	1.61105e+08	1.71212e+08	1.12765e+08	1.15775e+08	6.02608e+07	7.54485e+07	5.18644e+07	4.99718e+07	9.0903e+07	9.1757e+07	9.71847e+07	1.10787e+08	9.65405e+07	1.12077e+08	1.16566e+08	--	--	--	-	-	-	-
Com_24_neg	(+/-)9-HpODE	--	C18 H32 O4	7.274	311.223	4.27833e+09	4.92481e+09	3.28869e+09	3.57634e+09	3.19348e+09	2.7273e+09	4.15373e+09	4.05725e+09	2.37594e+09	2.32606e+09	2.49867e+09	2.52654e+09	3.38967e+09	3.14422e+09	3.38611e+09	--	--	--	-	-	-	-
Com_2518_neg	Gluconic acid	--	C6 H12 O7	1.313	195.051	8.41466e+06	8.80029e+06	9.8877e+06	1.01094e+07	1.06595e+07	8.11812e+06	1.62334e+07	1.51008e+07	8.54279e+06	8.36377e+06	1.03502e+07	1.08464e+07	1.11431e+07	9.82033e+06	1.02151e+07	Organooxygen compounds	526-95-4	HMDB0000625	C00257	ko01100//Metabolic pathways;ko01110//Biosynthesis of secondary metabolites;ko01120//Microbial metabolism in diverse environments;ko01130//Biosynthesis of antibiotics;ko01200//Carbon metabolism;ko00030//Pentose phosphate pathway	Carbohydrate metabolism;Global and overview maps	Metabolism
Com_900_neg	(2R)-2,3-Dihydroxypropanoic acid	--	C3 H6 O4	1.363	105.019	2.91706e+07	5.53903e+07	2.89277e+07	4.35821e+07	3.2869e+07	2.19044e+07	2.57903e+07	3.77069e+07	4.04859e+07	3.77167e+07	4.2982e+07	2.40654e+07	4.09191e+07	3.75499e+07	4.14294e+07	--	--	--	-	-	-	-
Com_9032_neg	Cholic acid	--	C24 H40 O5	7.771	407.28	969787	1.11371e+06	1.08481e+06	875001	1.16354e+06	1.14633e+06	979038	1.06851e+06	896981	711667	822486	1.38236e+06	1.01922e+06	995395	985422	Steroids and steroid derivatives	81-25-4	HMDB0000619	C00695	ko01100//Metabolic pathways	Global and overview maps	Metabolism
Com_3069_neg	4-oxo-4,5,6,7-tetrahydrobenzo[b]furan-3-carboxylic acid	--	C9 H8 O4	5.551	179.035	1.02373e+07	8.46891e+06	8.9542e+06	8.11839e+06	1.01129e+07	1.08017e+07	1.03657e+07	1.10605e+07	1.03285e+07	1.03287e+07	9.67864e+06	9.01143e+06	8.90247e+06	9.79938e+06	1.21467e+07	--	--	--	-	-	-	-
Com_4696_neg	Caffeic acid	--	C9 H8 O4	4.955	179.035	2.28768e+06	2.18954e+06	2.69596e+06	1.29002e+06	3.53038e+06	4.39333e+06	4.7437e+06	4.0342e+06	4.25943e+06	3.99147e+06	6.19614e+06	5.64359e+06	3.34759e+06	4.08452e+06	3.87161e+06	Cinnamic acids and derivatives	331-39-5	HMDB0001964	-	-	-	-
Com_3130_neg	α-D-Mannose 1-phosphate	--	C6 H13 O9 P	1.455	259.022	4.25117e+06	4.21679e+06	6.99152e+06	3.58994e+06	2.72412e+06	2.49665e+06	1.07206e+07	1.1971e+07	4.33797e+06	6.33218e+06	8.40803e+06	9.07793e+06	5.68203e+06	4.64269e+06	5.49684e+06	--	--	--	-	-	-	-
Com_194_neg	cis-Aconitic acid	--	C6 H6 O6	2.169	173.009	3.04273e+08	3.07118e+08	2.49238e+08	2.10325e+08	2.86944e+08	2.82057e+08	2.98163e+08	3.13294e+08	3.5204e+08	3.04283e+08	4.00542e+08	3.45926e+08	3.13775e+08	3.54748e+08	3.07915e+08	Carboxylic acids and derivatives	585-84-2	HMDB0000072	C00417	ko01100//Metabolic pathways;ko01110//Biosynthesis of secondary metabolites;ko01120//Microbial metabolism in diverse environments;ko01130//Biosynthesis of antibiotics;ko01210//2-Oxocarboxylic acid metabolism;ko00630//Glyoxylate and dicarboxylate metabolism;ko00020//Citrate cycle (TCA cycle);ko00660//C5-Branched dibasic acid metabolism	Carbohydrate metabolism;Global and overview maps	Metabolism
Com_1607_neg	(±)12(13)-DiHOME	--	C18 H34 O4	7.961	313.238	7.7522e+06	7.65837e+06	6.42193e+06	7.76506e+06	3.18445e+06	3.48454e+06	2.85325e+07	2.99309e+07	3.57932e+06	3.15552e+06	2.95365e+06	2.88554e+06	9.59522e+06	1.12752e+07	8.73085e+06	--	--	--	-	-	-	-
Com_3923_neg	Luteolin	--	C15 H10 O6	5.527	285.04	2.19389e+06	2.10931e+06	2.31847e+06	2.43576e+06	4.8415e+06	4.92054e+06	4.23574e+06	4.44038e+06	1.94914e+06	2.51437e+06	8.27215e+06	6.13268e+06	3.4016e+06	3.46458e+06	3.54808e+06	Flavonoids	491-70-3	HMDB0005800	C01514	ko01100//Metabolic pathways;ko01110//Biosynthesis of secondary metabolites;ko00941//Flavonoid biosynthesis;ko00944//Flavone and flavonol biosynthesis	Biosynthesis of other secondary metabolites;Global and overview maps	Metabolism
Com_421_neg	Rutin	--	C27 H30 O16	5.373	609.146	2.29452e+07	2.1974e+07	4.9284e+07	4.4541e+07	4.82348e+07	4.56173e+07	9.00303e+07	9.67072e+07	7.79034e+07	7.4003e+07	1.52259e+08	1.54857e+08	7.01338e+07	6.93108e+07	7.5586e+07	Flavonoids	153-18-4	HMDB0003249	C05625	ko01100//Metabolic pathways;ko01110//Biosynthesis of secondary metabolites;ko00944//Flavone and flavonol biosynthesis	Biosynthesis of other secondary metabolites;Global and overview maps	Metabolism
Com_1604_neg	2-Isopropylmalic acid	--	C7 H12 O5	4.807	175.061	2.70382e+07	2.46429e+07	2.02708e+07	2.29839e+07	2.85882e+07	2.55664e+07	2.0312e+07	2.04644e+07	2.40559e+07	2.43885e+07	1.75041e+07	1.73709e+07	2.48957e+07	2.16427e+07	2.27482e+07	Fatty Acyls	3237-44-3	HMDB0000402	C02504	ko01100//Metabolic pathways;ko01110//Biosynthesis of secondary metabolites;ko01230//Biosynthesis of amino acids;ko01210//2-Oxocarboxylic acid metabolism;ko00620//Pyruvate metabolism;ko00290//Valine, leucine and isoleucine biosynthesis	Amino acid metabolism;Carbohydrate metabolism;Global and overview maps	Metabolism
Com_3982_neg	Ferulic acid	--	C10 H10 O4	5.718	193.05	5.38027e+06	7.26816e+06	5.60561e+06	5.37972e+06	5.94502e+06	6.09133e+06	5.83146e+06	7.41594e+06	5.56394e+06	5.14934e+06	5.95824e+06	5.89566e+06	5.25156e+06	5.12435e+06	6.04205e+06	Cinnamic acids and derivatives	537-98-4	HMDB0000954	C01494	ko01100//Metabolic pathways;ko01110//Biosynthesis of secondary metabolites;ko00940//Phenylpropanoid biosynthesis	Biosynthesis of other secondary metabolites;Global and overview maps	Metabolism
Com_58_neg	α,α-Trehalose	--	C12 H22 O11	1.504	377.085	9.96405e+08	1.56289e+09	1.10039e+09	1.21377e+09	2.09122e+09	2.4214e+09	1.84704e+09	1.69617e+09	1.79546e+09	1.9071e+09	1.15218e+09	2.04632e+09	1.10465e+09	1.40193e+09	1.58219e+09	--	--	--	-	-	-	-
Com_2299_neg	2-Hydroxycaproic acid	--	C6 H12 O3	5.362	131.071	9.03867e+06	6.86477e+06	9.15817e+06	8.29716e+06	1.40714e+07	1.34316e+07	1.62248e+07	1.8804e+07	1.23641e+07	1.26637e+07	6.07229e+06	6.52044e+06	1.09815e+07	9.40594e+06	1.25802e+07	Fatty Acyls	6064-63-7	HMDB0001624	-	-	-	-
Com_1184_neg	Ethyl-β-D-glucuronide	--	C8 H14 O7	5.606	221.066	3.42838e+07	3.59123e+07	2.49575e+07	2.56697e+07	3.51304e+07	3.87923e+07	3.29661e+07	3.17421e+07	3.29902e+07	2.84923e+07	4.25996e+07	3.92224e+07	3.25753e+07	2.59903e+07	3.54467e+07	--	--	--	-	-	-	-
Com_976_neg	4-Hydroxycoumarin	--	C9 H6 O3	5.474	161.024	3.15326e+07	2.91934e+07	1.03451e+07	1.06839e+07	5.42554e+07	5.41679e+07	4.16722e+07	4.19113e+07	1.35755e+07	1.39584e+07	4.40204e+07	4.30444e+07	3.47748e+07	3.01124e+07	3.69031e+07	Cinnamyl alcohols	1076-38-6	HMDB0003654	-	-	-	-
Com_450_neg	D-(-)-Fructose	--	C6 H12 O6	1.32	215.032	7.26826e+07	1.04683e+08	6.59927e+07	4.75844e+07	8.92711e+07	5.96616e+07	1.49886e+08	9.36358e+07	1.04593e+08	6.24592e+07	8.74338e+07	1.29269e+08	1.20088e+08	6.62438e+07	6.78418e+07	Carbohydrates and carbohydrate conjugates	57-48-7	HMDB0062538	-	-	-	-
Com_4045_neg	20-Hydroxy-(5Z,8Z,11Z,14Z)-eicosatetraenoic acid	--	C20 H32 O3	7.932	319.228	2.9798e+06	3.77632e+06	2.55368e+06	3.05062e+06	7.77212e+06	7.77939e+06	4.89058e+06	4.036e+06	2.85008e+06	2.92972e+06	5.44218e+06	3.89224e+06	3.41098e+06	3.31493e+06	3.96276e+06	Fatty Acyls	79551-86-3	HMDB0005998	C14748	ko01100//Metabolic pathways;ko00590//Arachidonic acid metabolism	Global and overview maps;Lipid metabolism	Metabolism
Com_12_neg	Citric acid	--	C6 H8 O7	2.094	191.019	1.0857e+10	1.03567e+10	1.02965e+10	1.03112e+10	1.04753e+10	1.05798e+10	1.12927e+10	8.59452e+09	1.19796e+10	1.14851e+10	1.18515e+10	11504915738	9.97055e+09	1.00247e+10	1.02865e+10	Carboxylic acids and derivatives	77-92-9	HMDB0000094	C00158	ko01100//Metabolic pathways;ko01110//Biosynthesis of secondary metabolites;ko01120//Microbial metabolism in diverse environments;ko01130//Biosynthesis of antibiotics;ko01230//Biosynthesis of amino acids;ko01200//Carbon metabolism;ko01210//2-Oxocarboxylic acid metabolism;ko00250//Alanine, aspartate and glutamate metabolism;ko00630//Glyoxylate and dicarboxylate metabolism;ko00020//Citrate cycle (TC…	Amino acid metabolism;Carbohydrate metabolism;Global and overview maps	Metabolism
Com_50_neg	DL-Malic acid	--	C4 H6 O5	1.692	133.014	3.03074e+08	3.14145e+08	2.36489e+09	1.05562e+09	1.39736e+09	1.50444e+09	1.46743e+09	4.64909e+08	8.07572e+08	6.93224e+08	6.27967e+08	8.6774e+08	7.52942e+08	5.59189e+08	9.46615e+08	Hydroxy acids and derivatives	6915-15-7	HMDB0000744	-	-	-	-
Com_1157_neg	4-Oxoproline	--	C5 H7 N O3	1.445	128.035	4.07912e+07	3.64299e+07	4.95973e+06	4.79756e+06	7.05229e+06	6.3141e+06	6.10597e+06	6.40554e+06	1.75335e+07	1.90071e+07	5.81419e+06	7.05917e+06	1.24505e+07	1.1502e+07	6.08654e+06	--	--	--	C01877	ko00330//Arginine and proline metabolism	Amino acid metabolism	Metabolism
Com_3351_neg	D-Saccharic acid	--	C6 H10 O8	1.456	209.03	5.12827e+06	5.30769e+06	7.23643e+06	6.41148e+06	6.53435e+06	8.39465e+06	1.04945e+07	9.59921e+06	4.35386e+06	5.83407e+06	6.43223e+06	6.99496e+06	6.951e+06	6.25479e+06	8.89072e+06	Organooxygen compounds	25525-21-7	HMDB0000663	C00818	ko01100//Metabolic pathways;ko00053//Ascorbate and aldarate metabolism	Carbohydrate metabolism;Global and overview maps	Metabolism
Com_1066_neg	δ-Ribono-1,4-lactone	--	C5 H8 O5	1.412	147.03	3.66533e+07	3.14746e+07	3.90411e+07	3.83179e+07	3.11226e+07	3.58926e+07	4.94212e+07	4.71323e+07	3.61685e+07	3.85381e+07	4.36738e+07	4.08401e+07	3.82385e+07	3.12436e+07	4.24407e+07	--	--	--	-	-	-	-
Com_5622_neg	Deoxycholic acid	--	C24 H40 O4	8.679	391.285	3.41219e+06	2.69955e+06	1.9814e+06	1.83743e+06	4.40994e+06	2.76477e+06	1.38101e+06	1.55388e+06	1.46815e+06	1.55363e+06	1.83134e+06	2.10207e+06	2.07569e+06	1.95021e+06	1.9894e+06	Steroids and steroid derivatives	83-44-3	HMDB0000626	-	-	-	-
Com_687_neg	N-Acetyl-D-alloisoleucine	--	C8 H15 N O3	5.444	172.098	2.00154e+07	1.72716e+07	1.30695e+07	1.22646e+07	8.44953e+07	8.4808e+07	4.35975e+07	4.05362e+07	1.1958e+07	1.11863e+07	1.25228e+07	1.34002e+07	3.19909e+07	2.80409e+07	3.21255e+07	--	--	--	-	-	-	-
Com_45_neg	N-Acetyl-L-phenylalanine	--	C11 H13 N O3	5.475	206.082	3.54951e+08	3.49269e+08	1.76775e+08	1.77944e+08	3.03281e+09	3.0146e+09	1.0961e+09	1.13792e+09	2.65575e+08	2.62583e+08	2.09186e+08	1.97632e+08	8.82945e+08	9.20993e+08	1.02134e+09	Carboxylic acids and derivatives	2018-61-3	HMDB0000512	C03519	ko00360//Phenylalanine metabolism	Amino acid metabolism	Metabolism
Com_7332_neg	(R)-3-Hydroxy myristic acid	--	C14 H28 O3	8.289	243.196	1.69062e+06	1.46885e+06	1.88158e+06	2.20447e+06	1.97232e+06	2.09411e+06	1.8556e+06	2.15551e+06	1.7344e+06	1.96862e+06	2.09221e+06	1.87425e+06	1.79135e+06	1.90604e+06	1.83089e+06	--	--	--	-	-	-	-
Com_1210_neg	4-Nitrophenol	--	C6 H5 N O3	5.384	138.019	3.6841e+07	3.40331e+07	1.20647e+07	1.04422e+07	3.13614e+07	2.99152e+07	1.99119e+07	2.02547e+07	2.16776e+07	2.42168e+07	3.95365e+07	4.0802e+07	2.45336e+07	3.00198e+07	3.02959e+07	Benzene and substituted derivatives	98-95-3	HMDB0041950	C00870	ko01120//Microbial metabolism in diverse environments	Global and overview maps	Metabolism
Com_5413_neg	Porphobilinogen	--	C10 H14 N2 O4	4.839	225.088	4.3899e+06	4.01708e+06	3.65523e+06	3.1781e+06	3.61911e+06	4.31321e+06	4.83579e+06	4.64573e+06	3.85792e+06	3.62944e+06	1.91918e+06	1.70267e+06	3.21231e+06	2.99989e+06	3.44585e+06	Organonitrogen compounds	487-90-1	HMDB0000245	C00931	ko01100//Metabolic pathways;ko01110//Biosynthesis of secondary metabolites;ko01120//Microbial metabolism in diverse environments;ko00860//Porphyrin and chlorophyll metabolism	Global and overview maps;Metabolism of cofactors and vitamins	Metabolism
Com_53_neg	D-(+)-Malic acid	--	C4 H6 O5	1.521	133.014	7.54195e+08	6.41313e+08	2.29934e+09	1.14278e+09	1.56422e+09	1.98811e+09	2.12843e+09	2.34457e+09	7.61199e+08	6.42032e+08	1.01305e+09	8.79935e+08	1.33483e+09	1.31435e+09	1.49565e+09	Fatty Acyls	636-61-3	HMDB0031518	C00497	ko00650//Butanoate metabolism	Carbohydrate metabolism	Metabolism
Com_208_neg	Fumaric acid	--	C4 H4 O4	1.715	115.003	5.40326e+07	5.58824e+07	1.03362e+08	1.18128e+08	9.02562e+07	8.82511e+07	3.64334e+08	3.93403e+08	8.68642e+07	8.88212e+07	2.62897e+08	2.61805e+08	1.7269e+08	1.82212e+08	2.01319e+08	Carboxylic acids and derivatives	110-17-8	HMDB0000134	C00122	ko01100//Metabolic pathways;ko01110//Biosynthesis of secondary metabolites;ko01120//Microbial metabolism in diverse environments;ko01130//Biosynthesis of antibiotics;ko00360//Phenylalanine metabolism;ko01200//Carbon metabolism;ko00350//Tyrosine metabolism;ko00250//Alanine, aspartate and glutamate metabolism;ko01220//Degradation of aromatic compounds;ko00220//Arginine biosynthesis;ko00760//Nicotin…	Amino acid metabolism;Carbohydrate metabolism;Energy metabolism;Global and overview maps;Metabolism of cofactors and vitamins	Metabolism
Com_6440_neg	11(E)-Eicosenoic Acid	--	C20 H38 O2	11.62	309.28	1.29963e+06	991333	1.68713e+06	1.63102e+06	3.42359e+06	3.51274e+06	2.99188e+06	3.04328e+06	855680	761621	625787	614178	2.57927e+06	2.20786e+06	2.36332e+06	--	--	--	-	-	-	-
Com_1057_neg	Uridine	--	C9 H12 N2 O6	2.266	243.062	3.44481e+07	4.43485e+07	4.21547e+07	2.6466e+07	3.75452e+07	2.54834e+07	3.35305e+07	3.69263e+07	1.76042e+07	2.23359e+07	4.14773e+07	2.2053e+07	3.2745e+07	3.22283e+07	2.38787e+07	Pyrimidine nucleosides	58-96-8	HMDB0000296	C00299	ko01100//Metabolic pathways;ko00240//Pyrimidine metabolism	Global and overview maps;Nucleotide metabolism	Metabolism
Com_2710_neg	Hippuric acid	--	C9 H9 N O3	5.285	178.051	7.98967e+06	7.609e+06	6.48282e+06	6.63512e+06	1.35778e+07	1.50311e+07	3.77047e+06	4.09478e+06	7.59793e+06	6.28063e+06	1.06565e+07	1.05096e+07	8.3309e+06	8.00139e+06	9.05766e+06	Benzene and substituted derivatives	495-69-2	HMDB0000714	C01586	ko00360//Phenylalanine metabolism	Amino acid metabolism	Metabolism
Com_143_neg	Quercetin-3β-D-glucoside	--	C21 H20 O12	5.401	463.088	1.53367e+07	1.41885e+07	1.40378e+07	1.50902e+07	1.04627e+08	1.09683e+08	8.55979e+07	7.85761e+07	4.55867e+07	4.53594e+07	5.49329e+08	5.46039e+08	1.41524e+08	1.53553e+08	1.69927e+08	--	--	--	-	-	-	-
Com_7091_neg	DL-Arginine	--	C6 H14 N4 O2	1.281	173.104	275607	260055	301619	349218	87746.4	145600	330277	312673	2.74688e+06	2.70018e+06	68118.7	95364.4	692731	545251	643227	--	--	--	-	-	-	-
Com_2564_neg	Benzoic acid	--	C7 H6 O2	5.063	121.029	7.76494e+06	7.3641e+06	1.12443e+07	1.2676e+07	6.96985e+06	6.70016e+06	1.58255e+07	1.46593e+07	1.24091e+07	1.32576e+07	9.86938e+06	9.32502e+06	7.9428e+06	1.20152e+07	1.2117e+07	Benzene and substituted derivatives	99-10-5	HMDB0013677	C00180	ko01100//Metabolic pathways;ko01110//Biosynthesis of secondary metabolites;ko01120//Microbial metabolism in diverse environments;ko00360//Phenylalanine metabolism;ko01220//Degradation of aromatic compounds	Amino acid metabolism;Global and overview maps	Metabolism
Com_861_neg	Dodecanedioic acid	--	C12 H22 O4	6.382	229.144	5.56415e+07	5.12265e+07	5.16519e+07	5.46957e+07	3.1942e+07	3.35211e+07	3.77814e+07	4.18786e+07	1.95904e+07	1.90161e+07	4.02619e+07	3.83604e+07	4.07163e+07	3.99054e+07	4.79016e+07	Fatty Acyls	6402-36-4	HMDB0000933	-	-	-	-
Com_4126_neg	N-Acetyl-DL-glutamic acid	--	C7 H11 N O5	2.339	188.056	6.58429e+06	6.91954e+06	4.12691e+06	3.76522e+06	7.52736e+06	7.59113e+06	6.74235e+06	6.91475e+06	3.68471e+06	3.68807e+06	3.71664e+06	3.50889e+06	5.29962e+06	4.77253e+06	4.84052e+06	Carboxylic acids and derivatives	1188-37-0	HMDB0001138	C00624	ko01100//Metabolic pathways;ko01110//Biosynthesis of secondary metabolites;ko01130//Biosynthesis of antibiotics;ko01230//Biosynthesis of amino acids;ko01210//2-Oxocarboxylic acid metabolism;ko00220//Arginine biosynthesis	Amino acid metabolism;Global and overview maps	Metabolism
Com_2584_neg	Eugenol	--	C10 H12 O2	5.74	163.076	5.16308e+06	5.134e+06	7.57469e+06	7.53112e+06	2.67629e+06	2.16981e+06	1.56856e+07	1.43675e+07	3.71369e+06	4.69211e+06	2.82288e+06	2.36137e+06	4.52953e+06	4.72312e+06	5.01197e+06	Phenols	97-53-0	HMDB0005809	C10453	ko00940//Phenylpropanoid biosynthesis	Biosynthesis of other secondary metabolites	Metabolism
Com_109_neg	2-Furoic acid	--	C5 H4 O3	2.095	111.008	6.00054e+08	7.07313e+08	6.70888e+08	7.30679e+08	7.5181e+08	7.62261e+08	8.31288e+08	6.47511e+08	8.13758e+08	7.98582e+08	7.07062e+08	6.84144e+08	7.94819e+08	6.32114e+08	6.69186e+08	Furans	88-14-2	HMDB0000617	C01546	ko01120//Microbial metabolism in diverse environments	Global and overview maps	Metabolism
Com_257_neg	Esculin	--	C15 H16 O9	5.027	339.072	6.45516e+07	7.5755e+07	7.44263e+07	5.73155e+07	2.87959e+08	2.9454e+08	2.09475e+08	1.92579e+08	1.57016e+08	1.52122e+08	2.84005e+08	2.68629e+08	1.58079e+08	1.39059e+08	1.879e+08	Coumarins and derivatives	531-75-9	HMDB0030820	-	-	-	-
Com_3796_neg	L-Histidine	--	C6 H9 N3 O2	5.126	154.062	1.46417e+06	1.57883e+06	1.18529e+06	1.38427e+06	7.27263e+06	8.75526e+06	1.55761e+06	1.72686e+06	3.03682e+06	3.10575e+06	1.67893e+06	1.33109e+06	2.16043e+06	3.02097e+06	2.98731e+06	Carboxylic acids and derivatives	71-00-1	HMDB0000177	C00135	ko01100//Metabolic pathways;ko01110//Biosynthesis of secondary metabolites;ko01230//Biosynthesis of amino acids;ko02010//ABC transporters;ko00970//Aminoacyl-tRNA biosynthesis;ko00410//beta-Alanine metabolism;ko00340//Histidine metabolism	Amino acid metabolism;Global and overview maps;Membrane transport;Metabolism of other amino acids;Translation	Environmental Information Processing;Genetic Information Processing;Metabolism
Com_567_neg	4,5-Dicaffeoylquinic acid	--	C25 H24 O12	5.317	515.119	3.33268e+06	3.40827e+06	5.3177e+07	5.37624e+07	8.12734e+06	9.26892e+06	1.06589e+08	1.14459e+08	7.28362e+07	7.47257e+07	4.75894e+07	4.14798e+07	3.42978e+07	4.29344e+07	4.78473e+07	Alcohols and polyols	57378-72-0	HMDB0030707	-	-	-	-
Com_759_neg	Catechin	--	C15 H14 O6	5.016	289.072	142381	127558	1.03023e+06	919230	151612	143005	7.63172e+07	7.58856e+07	144234	151518	157444	149655	9.65578e+06	9.7136e+06	1.09407e+07	Flavonoids	35323-91-2	HMDB0037954	-	-	-	-
Com_1621_neg	Guanosine	--	C10 H13 N5 O5	3.232	282.084	2.60552e+07	2.55322e+07	2.42035e+07	2.12402e+07	1.70637e+07	1.72038e+07	2.20577e+07	1.92308e+07	1.33362e+07	1.42265e+07	1.4171e+07	1.41439e+07	1.66869e+07	1.79252e+07	1.93373e+07	Purine nucleosides	118-00-3	HMDB0000133	C00387	ko01100//Metabolic pathways;ko00230//Purine metabolism	Global and overview maps;Nucleotide metabolism	Metabolism
Com_1063_neg	Salicylic acid	--	C7 H6 O3	5.872	137.024	3.23192e+07	3.38727e+07	4.17517e+07	3.95749e+07	3.13811e+07	3.09978e+07	4.06797e+07	3.80268e+07	2.18015e+07	2.06785e+07	4.19479e+07	4.41846e+07	3.5147e+07	3.33551e+07	4.04691e+07	Benzene and substituted derivatives	69-72-7	HMDB0001895	C00805	ko01100//Metabolic pathways;ko01110//Biosynthesis of secondary metabolites;ko01120//Microbial metabolism in diverse environments;ko01130//Biosynthesis of antibiotics;ko00360//Phenylalanine metabolism;ko01220//Degradation of aromatic compounds;ko04075//Plant hormone signal transduction	Amino acid metabolism;Global and overview maps;Signal transduction	Environmental Information Processing;Metabolism
Com_768_neg	8Z,11Z,14Z-Eicosatrienoic acid	--	C20 H34 O2	10.422	305.248	3.23965e+07	3.0439e+07	3.9421e+07	3.99805e+07	7.20426e+07	7.59643e+07	3.53868e+07	3.41e+07	2.22235e+07	2.2211e+07	1.69325e+07	1.56149e+07	4.07527e+07	3.61394e+07	4.01671e+07	Fatty Acyls	1783-84-2	HMDB0002925	C03242	ko01100//Metabolic pathways;ko01040//Biosynthesis of unsaturated fatty acids;ko00591//Linoleic acid metabolism	Global and overview maps;Lipid metabolism	Metabolism
Com_8125_neg	N-(2-chlorophenyl)hydrazine-1-carbothioamide	--	C7 H8 Cl N3 S	1.244	200.005	1.20402e+06	887496	1.59207e+06	1.70021e+06	828122	734031	884634	808126	742191	711598	1.28014e+06	1.21386e+06	1.1728e+06	1.02717e+06	1.0806e+06	--	--	--	-	-	-	-
Com_2898_neg	Shanzhiside	--	C16 H24 O11	5.565	391.125	1.02689e+07	1.19241e+07	8.38596e+06	7.31376e+06	1.13753e+07	1.04982e+07	4.99603e+06	4.70464e+06	7.09418e+06	7.37105e+06	8.3245e+06	8.85181e+06	7.86125e+06	7.48636e+06	9.86285e+06	--	--	--	-	-	-	-
Com_4845_neg	Isosakuranetin	--	C16 H14 O5	5.031	285.074	4.66578e+06	2.10147e+06	2.26802e+06	2.03635e+06	601439	774069	4.72271e+06	4.87534e+06	1.91754e+06	2.02165e+06	5.93084e+06	5.44833e+06	3.16085e+06	3.26069e+06	3.26635e+06	--	--	--	C05334	ko01110//Biosynthesis of secondary metabolites	Global and overview maps	Metabolism
Com_6303_neg	--	Leucosceptoside A	C30 H38 O15	5.398	637.214	2.00584e+06	1.81452e+06	1.5447e+06	1.37073e+06	2.5846e+06	1.57215e+06	2.24508e+06	1.34986e+06	3.52734e+06	2.82721e+06	1.95888e+06	2.33375e+06	1.95615e+06	2.04468e+06	1.22866e+06	--	--	--	-	-	-	-
Com_9982_neg	OxPG (16:0-18:1+1O(1Cyc))	--	C40 H75 O11 P	10.472	761.494	389190	341692	300848	368732	250228	300368	845778	428957	627359	354520	307377	374338	681037	766229	784366	--	--	--	-	-	-	-
Com_8388_neg	LPC 18:0	--	C26 H54 N O7 P	9.992	568.363	797907	822523	1.53795e+06	1.49686e+06	973923	1.02917e+06	671598	672599	1.02654e+06	1.19972e+06	637024	634206	975017	1.03984e+06	1.0196e+06	--	--	--	-	-	-	-
Com_5932_neg	--	Alpha-Linolenic acid	C18 H30 O2	0.521	277.217	3.1324e+06	2.81693e+06	2.36157e+06	2.01724e+06	3.53523e+06	2.97414e+06	3.01894e+06	4.16263e+06	2.46965e+06	3.17732e+06	2.33833e+06	2.43205e+06	2.25258e+06	2.52918e+06	2.37426e+06	Fatty Acyls	463-40-1	HMDB0001388	C06427	ko01100//Metabolic pathways;ko01110//Biosynthesis of secondary metabolites;ko01040//Biosynthesis of unsaturated fatty acids;ko00592//alpha-Linolenic acid metabolism	Global and overview maps;Lipid metabolism	Metabolism
Com_2694_neg	15(S)-HpETE	--	C20 H32 O4	7.017	373.179	9.41278e+06	1.04969e+07	1.00391e+07	1.13438e+07	1.07636e+07	1.31189e+07	1.22187e+07	7.3054e+06	1.41889e+06	1.08607e+06	9.7306e+06	1.06324e+07	7.10193e+06	1.36112e+07	8.88973e+06	Fatty Acyls	70981-96-3	HMDB0004244	C05966	ko01100//Metabolic pathways;ko00590//Arachidonic acid metabolism	Global and overview maps;Lipid metabolism	Metabolism
Com_1750_neg	--	Apo-13-zeaxanthinone	C18 H26 O2	6.716	273.186	2.05523e+07	2.00525e+07	2.17959e+07	1.93899e+07	1.87031e+07	1.96948e+07	1.28181e+07	1.47974e+07	2.02021e+07	1.92982e+07	1.77854e+07	1.80263e+07	1.88835e+07	1.77716e+07	1.86846e+07	--	--	--	-	-	-	-
Com_10382_neg	PG (6:0/22:0)	--	C34 H67 O10 P	10.695	665.428	333660	310132	396620	473202	447646	516146	408712	584962	317853	330830	296399	326999	447302	348496	435073	--	--	--	-	-	-	-
Com_2678_neg	--	Tricin 5-O-hexosyl-O-hexoside	C29 H34 O17	5.555	653.172	1.24595e+07	1.29157e+07	1.09846e+07	1.26985e+07	6.61726e+06	6.17838e+06	7.26709e+06	8.7327e+06	1.24786e+07	1.2817e+07	9.2776e+06	9.75978e+06	9.67212e+06	9.53843e+06	1.10438e+07	--	--	--	-	-	-	-
Com_935_neg	Gambogellic acid	--	C38 H44 O8	8.394	627.3	1.22296e+07	1.03927e+07	6.59073e+06	7.60001e+06	2.42209e+07	2.04205e+07	5.91571e+07	5.46805e+07	3.79836e+07	4.1387e+07	2.77395e+07	2.39829e+07	2.63374e+07	2.52795e+07	2.94142e+07	--	--	--	-	-	-	-
Com_11_neg	(±)9-HpODE	--	C18 H32 O4	7.904	311.223	7.9061e+09	8.18739e+09	1.06052e+10	1.06038e+10	4.24613e+09	3.97471e+09	5.6774e+09	8.8456e+09	7.9291e+09	8.55484e+09	6.7138e+09	6.57469e+09	8.03721e+09	7.59439e+09	8.82829e+09	--	--	--	-	-	-	-
Com_6461_neg	--	Pseudoginsenoside-RT5	C36 H62 O10	7.626	653.427	2.60386e+06	2.71717e+06	2.71495e+06	2.92997e+06	1.44841e+06	1.94263e+06	1.36655e+06	1.4956e+06	1.85487e+06	2.32789e+06	1.56295e+06	1.92583e+06	2.74489e+06	1.85e+06	2.22047e+06	--	--	--	-	-	-	-
Com_1011_neg	MGDG (2:0/12:0)	--	C23 H42 O10	5.78	537.292	2.77631e+07	2.11035e+07	4.2361e+07	4.50297e+07	3.18533e+07	2.87015e+07	3.51198e+07	3.91417e+07	4.4806e+07	4.15857e+07	2.97183e+07	2.87755e+07	2.91016e+07	2.42704e+07	3.75449e+07	--	--	--	-	-	-	-
Com_2603_neg	11-keto Testosterone (CRM)	--	C19 H26 O3	6.586	347.181	1.07321e+07	1.38287e+07	6.59572e+06	6.07189e+06	5.96103e+06	6.2576e+06	5.68668e+06	4.71866e+06	7.29358e+06	8.70041e+06	6.93584e+06	6.74637e+06	7.04274e+06	6.21033e+06	9.17566e+06	--	--	--	-	-	-	-
Com_1073_neg	PE (2:0/16:4)	--	C23 H38 N O8 P	5.654	486.234	2.98377e+06	1.85329e+07	4.35015e+06	4.31675e+06	1.45324e+07	2.85727e+07	2.65652e+07	3.79028e+06	3.68333e+06	1.41511e+07	4.88804e+07	3.64423e+06	5.04131e+06	5.94018e+06	6.66207e+06	--	--	--	-	-	-	-
Com_4857_neg	--	Sedoheptulose Anhydride	C7 H12 O6	1.468	237.061	2.36009e+06	1.90983e+06	2.47954e+06	1.8853e+06	2.83994e+06	6.00122e+06	3.2361e+06	3.47525e+06	2.63799e+06	2.88939e+06	3.00557e+06	3.37957e+06	3.08524e+06	2.7124e+06	4.8898e+06	--	--	--	-	-	-	-
Com_5803_neg	--	Methyl linoleate	C19 H34 O2	10.54	293.248	1.90075e+06	2.01444e+06	1.78028e+06	1.81222e+06	4.17383e+06	4.15183e+06	1.64453e+06	1.82059e+06	1.07516e+06	849094	934302	869015	2.35646e+06	1.99285e+06	2.21953e+06	Fatty Acyls	112-63-0	HMDB0034381	-	-	-	-
Com_7199_neg	Icaritin	--	C21 H20 O6	4.703	367.124	2.15732e+06	2.12253e+06	1.94795e+06	1.42489e+06	2.67562e+06	2.77164e+06	1.94766e+06	1.89422e+06	1.9212e+06	1.68425e+06	2.44521e+06	2.27596e+06	1.82998e+06	1.62585e+06	1.97902e+06	--	--	--	-	-	-	-
Com_5023_neg	FAHFA (16:1/18:3)	--	C34 H58 O4	10.142	529.423	4.9044e+06	4.82523e+06	4.63146e+06	4.32763e+06	5.42884e+06	4.66e+06	1.41988e+06	1.52784e+06	2.23948e+06	2.36067e+06	3.18916e+06	2.59218e+06	3.87763e+06	3.68765e+06	4.02261e+06	--	--	--	-	-	-	-
Com_7401_neg	--	Bufotaline	C26 H36 O6	7.269	443.244	1.55613e+06	1.6407e+06	2.05997e+06	1.82725e+06	2.04365e+06	1.73511e+06	2.46041e+06	1.54185e+06	1.9177e+06	2.39025e+06	1.63653e+06	1.73302e+06	2.36548e+06	2.01667e+06	2.13148e+06	--	--	--	-	-	-	-
Com_2376_neg	LPA 18:5	--	C21 H33 O7 P	5.857	427.197	8.07503e+06	8.57415e+06	7.08631e+06	7.20082e+06	1.73061e+07	1.76698e+07	5.15566e+06	5.10971e+06	4.05933e+06	4.26633e+06	6.07595e+06	6.56327e+06	7.86367e+06	8.14224e+06	9.09481e+06	--	--	--	-	-	-	-
Com_4931_neg	--	Pantetheine	C11 H22 N2 O4 S	5.274	277.122	3.24219e+06	2.36246e+06	2.21181e+06	2.78802e+06	4.54755e+06	3.73545e+06	4.6878e+06	5.10652e+06	3.58267e+06	3.4043e+06	4.58803e+06	5.61492e+06	3.81284e+06	3.73186e+06	4.31077e+06	Carboxylic acids and derivatives	496-65-1	HMDB0003426	C00831	ko01130//Biosynthesis of antibiotics;ko00770//Pantothenate and CoA biosynthesis;ko00332//Carbapenem biosynthesis	Biosynthesis of other secondary metabolites;Global and overview maps;Metabolism of cofactors and vitamins	Metabolism
Com_867_neg	20-Hydroxy prostaglandin F2α	--	C20 H34 O6	6.337	369.227	3.09778e+07	3.4067e+07	3.37641e+07	4.07347e+07	6.30553e+07	3.23923e+07	2.8784e+07	2.40715e+07	3.04481e+07	3.07225e+07	2.61292e+07	2.55507e+07	3.19119e+07	3.48849e+07	3.33469e+07	--	--	--	-	-	-	-
Com_8915_neg	PI (16:0/20:5)	--	C45 H77 O13 P	10.691	855.497	1.00088e+06	857406	854348	891297	769028	1.14224e+06	858401	640577	723684	1.23771e+06	660897	988280	754720	1.19603e+06	1.49306e+06	--	--	--	-	-	-	-
Com_605_neg	--	delta-Hexanolactone	C6 H10 O2	5.453	113.061	9.47148e+07	8.43691e+07	6.53677e+07	6.42837e+07	8.10607e+07	8.61412e+07	6.72912e+07	6.62903e+07	7.54082e+07	7.00409e+07	5.47738e+07	5.75298e+07	6.65917e+07	6.82518e+07	7.26493e+07	Lactones	823-22-3	HMDB0000453	-	-	-	-
Com_8614_neg	GlcADG (24:0-18:3)	--	C51 H90 O11	9.578	877.629	990447	753780	615814	494589	473290	566692	1.68283e+06	366343	542264	1.02062e+06	1.28928e+06	886670	655862	762626	689612	--	--	--	-	-	-	-
Com_2493_neg	Ethyl-beta-glucuronide	--	C8 H14 O7	5.296	221.066	2.45036e+06	2.5711e+06	1.98742e+06	1.87662e+06	2.00138e+06	6.31476e+06	1.92188e+06	2.09145e+06	2.40936e+06	2.3579e+06	8.04247e+06	1.60384e+07	1.95037e+06	1.97912e+06	2.46879e+06	--	--	--	-	-	-	-
Com_6364_neg	--	4-Pyridoxate	C8 H9 N O4	5.21	182.046	1.72058e+06	2.16804e+06	2.07471e+06	2.45203e+06	3.50759e+06	2.58492e+06	1.80805e+06	1.66432e+06	2.11146e+06	2.44329e+06	3.0902e+06	2.77423e+06	2.71139e+06	2.36024e+06	3.23556e+06	Pyridines and derivatives	82-82-6	HMDB0000017	C00847	ko01100//Metabolic pathways;ko01120//Microbial metabolism in diverse environments;ko00750//Vitamin B6 metabolism	Global and overview maps;Metabolism of cofactors and vitamins	Metabolism
Com_234_neg	--	D-Phenylalanine	C9 H11 N O2	5.475	164.071	3.84924e+07	3.50914e+07	1.99746e+07	1.99864e+07	3.21973e+08	3.15468e+08	1.11183e+08	1.16949e+08	2.85353e+07	3.02459e+07	2.39184e+07	2.29694e+07	1.03503e+08	9.93656e+07	1.06636e+08	--	--	--	C02265	ko00360//Phenylalanine metabolism	Amino acid metabolism	Metabolism
Com_852_neg	--	Octanedioic acid	C8 H14 O4	5.636	393.178	6.03202e+07	5.47915e+07	2.9585e+06	5.30624e+06	3.75553e+07	3.14215e+07	2.88262e+07	6.09741e+06	4.21868e+06	5.36851e+06	2.15148e+06	2.64428e+07	3.3739e+07	3.53761e+07	4.0999e+07	Fatty Acyls	505-48-6	HMDB0000893	-	-	-	-
Com_1449_neg	2-(2-carboxy-2-methylpropyl)-4,6-dimethylbenzoic acid	--	C14 H18 O4	6.245	249.11	2.85693e+07	2.99901e+07	1.79917e+07	1.87729e+07	1.58384e+07	1.39675e+07	2.44699e+07	2.36277e+07	1.5752e+07	1.41004e+07	1.8967e+07	1.85145e+07	2.03481e+07	2.01012e+07	2.231e+07	--	--	--	-	-	-	-
Com_5553_neg	DGDG (4:0/4:0)	--	C23 H40 O15	9.934	601.243	1.6094e+06	1.53308e+06	3.84912e+06	3.8842e+06	1.85857e+06	1.66771e+06	1.52036e+06	1.37749e+06	901809	1.54912e+06	1.82017e+06	1.65454e+06	2.33149e+06	2.14384e+06	2.03581e+06	--	--	--	-	-	-	-
Com_4720_neg	PA (2:0/16:3)	--	C21 H35 O8 P	7.209	445.199	1.08246e+06	935411	888814	1.07849e+06	5.19509e+06	6.26969e+06	2.62931e+06	3.36145e+06	2.77889e+06	3.29417e+06	3.33336e+06	4.08554e+06	2.93825e+06	2.57208e+06	3.8818e+06	--	--	--	-	-	-	-
Com_4946_neg	Vaccarin	--	C32 H38 O19	5.11	725.191	1.327e+06	1.26892e+06	1.13095e+06	1.24331e+06	545018	2.04434e+06	5.39433e+06	5.83713e+06	3.49801e+06	4.91077e+06	3.90809e+06	2.54241e+06	2.69704e+06	2.06485e+06	3.50498e+06	--	--	--	-	-	-	-
Com_643_neg	MGDG (2:0/16:4)	--	C27 H42 O10	5.963	585.292	8.77333e+07	8.25127e+07	1.51081e+07	1.74481e+07	2.92845e+07	3.54929e+07	2.18722e+07	2.3972e+07	2.49121e+07	2.66881e+07	5.43014e+07	5.26428e+07	3.93728e+07	3.85039e+07	3.91615e+07	--	--	--	-	-	-	-
Com_2022_neg	8-Iso prostaglandin A2	--	C20 H30 O4	7.895	369.182	1.46649e+07	1.47981e+07	1.42587e+07	1.24043e+07	1.00628e+07	1.04637e+07	2.16069e+07	2.09907e+07	1.58635e+07	1.91256e+07	1.70597e+07	1.71356e+07	1.73772e+07	1.44638e+07	1.61984e+07	--	--	--	-	-	-	-
Com_4214_neg	--	Yuheinoside	C16 H24 O9	4.859	359.136	5.11062e+06	3.90134e+06	4.24188e+06	4.0931e+06	7.35043e+06	5.44072e+06	6.072e+06	6.15484e+06	5.87308e+06	6.44503e+06	6.55784e+06	4.10097e+06	4.72257e+06	5.57131e+06	7.01253e+06	--	--	--	-	-	-	-
Com_6090_neg	nor-6β-Oxycodol	--	C17 H21 N O4	4.752	302.135	3.26292e+06	3.49759e+06	1.68033e+06	2.66519e+06	1.92766e+06	2.26883e+06	2.29741e+06	1.62787e+06	1.62704e+06	1.73077e+06	1.55327e+06	1.39238e+06	2.13685e+06	2.15674e+06	2.47768e+06	--	--	--	-	-	-	-
Com_8091_neg	Peucedanol	--	C14 H16 O5	5.816	263.09	797846	940469	594789	808397	320869	341795	1.10634e+06	1.76321e+06	1.60649e+06	1.945e+06	854691	940155	895696	757210	925603	--	--	--	-	-	-	-
Com_564_neg	--	3,4-Dihydroxybenzaldehyde	C7 H6 O3	5.183	137.024	7.72194e+07	6.61589e+07	9.46361e+07	9.29855e+07	4.69798e+07	4.67157e+07	7.15364e+07	7.0743e+07	6.93586e+07	7.15103e+07	7.65222e+07	7.6175e+07	6.0768e+07	7.11097e+07	7.89418e+07	Benzene and substituted derivatives	139-85-5	HMDB0059965	C16700	ko00950//Isoquinoline alkaloid biosynthesis	Biosynthesis of other secondary metabolites	Metabolism
Com_4665_neg	Ala-Leu	--	C9 H18 N2 O3	5.001	201.124	5.79436e+06	5.12921e+06	3.97562e+06	3.70923e+06	2.11835e+06	1.97361e+06	4.56471e+06	4.17013e+06	2.92603e+06	2.8728e+06	2.55921e+06	2.64428e+06	3.27849e+06	3.0737e+06	3.75469e+06	Carboxylic acids and derivatives	-	HMDB0028691	-	-	-	-
Com_7948_neg	--	Integrifoside A	C21 H36 O8	7.384	415.232	1.97587e+06	1.75574e+06	1.34527e+06	991155	923679	926657	978360	967865	1.4757e+06	1.27064e+06	1.01213e+06	1.13006e+06	1.23974e+06	1.13046e+06	1.349e+06	--	--	--	-	-	-	-
Com_1219_neg	MGDG (2:0/24:2)	--	C35 H62 O10	5.692	687.432	3.3549e+07	3.331e+07	3.48924e+07	3.39435e+07	6.17823e+06	5.59144e+06	5.66763e+06	3.54599e+06	1.83214e+07	1.87751e+07	6.70952e+06	8.16514e+06	1.74079e+07	1.37447e+07	1.60049e+07	--	--	--	-	-	-	-
Com_9925_neg	N1-(4-cyclohexylphenyl)-2-[(4-methylphenyl)thio]acetamide	--	C21 H25 N O S	10.473	374.132	234627	325694	291523	230360	259603	215191	533494	533517	292663	222355	200880	324667	813062	448873	534184	--	--	--	-	-	-	-
Com_2046_neg	DGDG (2:0/22:5)	--	C39 H62 O15	5.686	815.408	9.84624e+06	1.02551e+07	7.957e+06	8.15447e+06	9.54587e+06	1.05054e+07	9.17e+06	8.4647e+06	1.00481e+07	8.59829e+06	2.12203e+07	1.79597e+07	9.44951e+06	1.12159e+07	1.19619e+07	--	--	--	-	-	-	-
Com_8831_neg	Polydatin	--	C20 H22 O8	5.309	389.123	608141	526893	461056	495192	1.11593e+06	1.56633e+06	1.02865e+06	910601	696882	929147	1.45696e+06	831011	596438	798768	847311	Stilbenes	27208-80-6	HMDB0030564	-	-	-	-
Com_9047_neg	--	Desthiobiotin	C10 H18 N2 O3	4.742	213.124	1.21105e+06	1.25782e+06	906178	850251	738206	495273	813495	606251	803599	582054	576898	551970	803258	709585	782457	Fatty Acyls	533-48-2	HMDB0003581	C01909	ko01100//Metabolic pathways;ko00780//Biotin metabolism	Global and overview maps;Metabolism of cofactors and vitamins	Metabolism
Com_1584_neg	--	Hordatine B	C29 H40 N8 O5	5.911	579.303	2.34202e+07	2.06674e+07	2.50269e+07	2.29233e+07	1.95394e+07	2.00149e+07	2.09608e+07	1.87889e+07	2.01048e+07	2.2122e+07	1.62523e+07	2.54026e+07	2.16123e+07	1.90384e+07	2.0317e+07	2-arylbenzofuran flavonoids	10502-21-3	HMDB0030459	-	-	-	-
Com_1576_neg	13,14-dihydro-15-keto-tetranor Prostaglandin D2	--	C16 H26 O5	6.019	279.16	2.42717e+07	2.53175e+07	2.52359e+07	2.20051e+07	1.04299e+07	1.10491e+07	1.4096e+07	1.18022e+07	1.92227e+07	2.07227e+07	1.15147e+07	1.43967e+07	1.63184e+07	1.55389e+07	1.64001e+07	--	--	--	-	-	-	-
Com_7770_neg	Loxoprofen	--	C15 H18 O3	5.062	245.114	1.64742e+06	2.04613e+06	1.4245e+06	1.27799e+06	815715	1.23346e+06	1.92199e+06	1.24938e+06	1.13221e+06	1.15896e+06	906592	900672	988391	591831	1.23559e+06	Phenylpropanoic acids	80382-23-6	HMDB0041920	-	-	-	-
Com_4927_neg	GlcADG (18:4-18:5)	--	C45 H66 O11	8.177	781.438	517030	752976	573640	739784	501269	610232	4.93558e+06	5.87748e+06	2.18394e+06	2.74039e+06	1.77636e+06	1.94482e+06	1.49155e+06	1.50843e+06	1.53048e+06	--	--	--	-	-	-	-
Com_7920_neg	--	3-O-p-coumaroyl quinic acid O-hexoside	C22 H28 O13	5.385	499.147	903356	1.43926e+06	650541	695270	1.26384e+06	2.20443e+06	918907	1.01137e+06	952364	849726	1.64278e+06	1.053e+06	953401	870955	1.17604e+06	--	--	--	-	-	-	-
Com_5642_neg	--	Gluconolactone	C6 H10 O6	1.364	177.04	3.60784e+06	4.00307e+06	2.0448e+06	1.8126e+06	2.59675e+06	2.24699e+06	3.20863e+06	3.01471e+06	2.33862e+06	1.73067e+06	2.34865e+06	2.25097e+06	3.13616e+06	2.43202e+06	2.74702e+06	Organooxygen compounds	90-80-2	HMDB0000150	C00198	ko01100//Metabolic pathways;ko01110//Biosynthesis of secondary metabolites;ko01120//Microbial metabolism in diverse environments;ko01130//Biosynthesis of antibiotics;ko01200//Carbon metabolism;ko00030//Pentose phosphate pathway	Carbohydrate metabolism;Global and overview maps	Metabolism
Com_3509_neg	PI (2:0/19:2)	--	C30 H53 O13 P	6.079	651.324	6.8224e+06	6.7545e+06	8.19839e+06	8.20635e+06	3.08359e+06	1.81266e+06	4.49553e+06	4.91727e+06	4.68737e+06	5.63409e+06	3.52456e+06	3.47971e+06	5.68316e+06	5.76905e+06	4.63456e+06	--	--	--	-	-	-	-
Com_2962_neg	OxPG (18:1-18:1+3O)	--	C42 H79 O13 P	9.19	821.505	1.05232e+06	1.36203e+06	824032	1.30209e+06	2.8262e+06	765715	1.15795e+07	1.31144e+07	4.65767e+06	6.58445e+06	2.5605e+06	2.89929e+06	2.93045e+06	2.89283e+06	2.55519e+06	--	--	--	-	-	-	-
Com_5272_neg	LPG 15:0	--	C21 H43 O9 P	8.331	469.257	3.04579e+06	3.07243e+06	1.99886e+06	2.78543e+06	4.98555e+06	1.65872e+06	3.21181e+06	4.6182e+06	3.20287e+06	2.98722e+06	3.37226e+06	3.28287e+06	2.57743e+06	2.57329e+06	3.32673e+06	--	--	--	-	-	-	-
Com_8542_neg	Albiflorin	--	C23 H28 O11	10.174	525.167	1.11363e+06	1.2931e+06	1.27362e+06	1.00673e+06	1.14135e+06	776422	983310	1.10109e+06	1.38784e+06	1.48298e+06	1.72177e+06	1.58076e+06	1.34328e+06	1.18154e+06	1.28564e+06	--	--	--	-	-	-	-
Com_7583_neg	6β-Prostaglandin I1	--	C20 H34 O5	10.264	335.22	1.82707e+06	1.85272e+06	1.03691e+06	1.04219e+06	2.37229e+06	2.31e+06	1.20332e+06	986755	832296	938554	1.46537e+06	1.26328e+06	1.50451e+06	1.19826e+06	1.29419e+06	--	--	--	-	-	-	-
Com_1617_neg	Methyl hesperidin	--	C29 H36 O15	6.249	623.192	2.57793e+06	2.1726e+06	928683	1.02282e+06	2.83243e+07	2.69632e+07	1.45169e+07	1.56642e+07	998708	958458	6.79248e+06	5.72503e+06	8.20238e+06	7.50314e+06	8.46853e+06	--	--	--	-	-	-	-
Com_3098_neg	--	(20R)Ginsenoside Rh2	C36 H62 O8	8.136	621.436	8.81884e+06	8.52636e+06	9.39211e+06	1.00687e+07	2.67309e+06	4.37865e+06	3.54899e+06	3.19709e+06	6.33297e+06	6.33933e+06	4.0482e+06	4.13323e+06	6.47903e+06	5.9285e+06	6.04828e+06	--	--	--	-	-	-	-
Com_4117_neg	PS (2:0/16:2)	--	C24 H42 N O10 P	7.139	534.247	2.17333e+06	1.95583e+06	1.85149e+06	2.58651e+06	2.08089e+06	2.90708e+06	5.13962e+06	5.86736e+06	4.3679e+06	5.48045e+06	7.73259e+06	6.89221e+06	4.62627e+06	4.16044e+06	4.73806e+06	--	--	--	-	-	-	-
Com_7368_neg	--	Cyanin chloride	C27 H31 Cl O16	5.161	645.122	387676	269866	217456	232229	2.5241e+06	2.62051e+06	1.45616e+06	2.04884e+06	214034	227438	2.15327e+06	2.48283e+06	1.33197e+06	877494	1.22617e+06	--	--	--	-	-	-	-
Com_7875_neg	Neoandrographolide	--	C26 H40 O8	6.583	479.264	2.03153e+06	1.55108e+06	1.3063e+06	1.3232e+06	1.6318e+06	957602	1.38419e+06	1.00839e+06	1.30208e+06	1.23454e+06	1.31029e+06	1.4284e+06	1.22371e+06	1.31087e+06	1.69142e+06	--	--	--	-	-	-	-
Com_3007_neg	3,3-Dimethylglutaric acid	--	C7 H12 O4	5.366	113.061	1.12209e+07	1.02572e+07	8.47514e+06	8.14653e+06	8.74826e+06	9.37031e+06	1.15148e+07	1.28093e+07	7.68347e+06	7.88459e+06	5.27715e+06	6.24934e+06	8.73724e+06	6.55129e+06	9.07701e+06	Fatty Acyls	4839-46-7	HMDB0002441	-	-	-	-
Com_1794_neg	6,7-Dihydroxycoumarin	--	C9 H6 O4	5.246	177.019	3.32221e+06	3.50022e+06	5.21248e+06	5.40236e+06	1.13068e+07	1.07572e+07	1.95674e+07	1.84773e+07	1.20771e+07	1.17999e+07	2.50196e+07	2.41896e+07	1.08204e+07	1.31704e+07	1.32972e+07	Coumarins and derivatives	305-01-1	HMDB0030819	-	-	-	-
Com_1074_neg	Dihydrocucurbitacin F	--	C30 H48 O7	8.668	519.33	4.49975e+07	3.55814e+07	1.8799e+07	3.4239e+07	2.02601e+06	1.38664e+06	2.20168e+06	2.19489e+06	1.8215e+06	2.1643e+06	2.57393e+06	2.02871e+06	2.62309e+06	3.30181e+06	2.84678e+06	--	--	--	-	-	-	-
Com_4200_neg	LPG 18:0	--	C24 H49 O9 P	10.938	511.304	5.47113e+06	4.82048e+06	5.7731e+06	5.29483e+06	6.81904e+06	7.63911e+06	5.29793e+06	4.1309e+06	6.26284e+06	5.90303e+06	5.81017e+06	5.92947e+06	5.81288e+06	5.67628e+06	5.10167e+06	--	--	--	-	-	-	-
Com_6320_neg	Nitrazepam-d5	--	C15 H6 [2]H5 N3 O3	4.829	285.109	1.20989e+06	1.31457e+06	1.35943e+06	1.44919e+06	3.03491e+06	3.67239e+06	1.44311e+06	1.38098e+06	1.94189e+06	1.30056e+06	1.17344e+06	1.11366e+06	1.91186e+06	1.59374e+06	1.64771e+06	--	--	--	-	-	-	-
Com_1205_neg	2-Hydroxyestradiol	--	C18 H24 O3	6.609	287.165	3.56583e+07	3.2861e+07	3.53605e+07	3.03989e+07	1.61799e+07	1.70973e+07	2.85232e+07	2.69538e+07	2.67326e+07	2.742e+07	3.5445e+07	2.08035e+07	2.58366e+07	2.51807e+07	3.01957e+07	Steroids and steroid derivatives	362-05-0	HMDB0000338	-	-	-	-
Com_10189_neg	20(R)-Ginsenoside Rh1	--	C36 H62 O9	7.161	683.434	44840.1	45289.4	42579.9	63204.7	42153.5	40196.8	45041.6	40903.2	36388.2	682299	71716.2	45523.6	44338.8	37384.9	42291	--	--	--	-	-	-	-
Com_3974_neg	--	Hydroxytyrosol	C8 H10 O3	4.914	153.055	2.5771e+06	2.76018e+06	2.78244e+06	3.10963e+06	7.81275e+06	8.25408e+06	3.48809e+06	2.81214e+06	3.86323e+06	2.75273e+06	5.09509e+06	4.28948e+06	3.1644e+06	3.2312e+06	3.19262e+06	Phenols	10597-60-1	HMDB0005784	-	-	-	-
Com_661_neg	(2E)-4-Hydroxy-3,7-dimethyl-2,6-octadien-1-yl beta-D-glucopyranoside	--	C16 H28 O7	5.549	377.182	7.62784e+07	7.6384e+07	7.52539e+07	6.06788e+07	7.0082e+07	6.72809e+07	7.36043e+07	7.34787e+07	6.01151e+07	6.18406e+07	9.12435e+07	8.95961e+07	7.09964e+07	7.11375e+07	7.50719e+07	--	--	--	-	-	-	-
Com_1649_neg	--	(+)-Dihydrojasmonic acid	C12 H20 O3	6.761	211.134	1.63714e+07	2.30909e+07	2.2525e+07	2.37605e+07	1.27594e+07	1.3449e+07	1.78188e+07	2.12501e+07	1.67403e+07	1.52828e+07	1.96184e+07	1.87883e+07	2.07459e+07	1.76372e+07	2.16638e+07	--	--	--	-	-	-	-
Com_9133_neg	--	Nodakenin	C20 H24 O9	4.944	407.135	221788	323511	100223	124701	1.32641e+06	1.27417e+06	1.01138e+06	654118	165813	283195	342156	335035	512409	474944	736592	--	--	--	-	-	-	-
Com_581_neg	Mangostin	--	C24 H26 O6	5.013	409.172	9.91272e+07	9.36007e+07	2.41515e+07	2.58673e+07	2.59564e+07	2.73874e+07	2.52204e+07	2.37136e+07	2.97053e+07	2.62097e+07	3.27252e+07	3.07424e+07	3.69103e+07	3.8725e+07	4.37041e+07	Benzopyrans	1551491	HMDB0035796	-	-	-	-
Com_632_neg	1a,1b-Dihomo prostaglandin F2α	--	C22 H38 O5	7.88	381.264	8.97062e+07	8.02189e+07	6.10787e+07	5.77491e+07	3.12862e+07	5.55103e+07	2.2657e+07	2.24933e+07	2.3005e+07	3.1882e+07	2.62139e+07	4.2157e+07	5.8047e+07	3.77772e+07	4.51431e+07	--	--	--	-	-	-	-
Com_2341_neg	LPG 17:1	--	C23 H45 O9 P	11.732	495.273	1.45522e+07	1.44001e+07	1.44235e+07	1.29646e+07	1.37459e+07	1.40346e+07	1.25409e+07	1.15504e+07	1.5059e+07	1.07056e+07	1.0634e+07	1.75818e+07	1.43e+07	1.57187e+07	1.24661e+07	--	--	--	-	-	-	-
Com_1751_neg	MGDG (9:0/16:4)	--	C34 H56 O10	8.027	669.375	1.21751e+07	1.41026e+07	7.79982e+06	8.56901e+06	2.35388e+07	2.63022e+07	1.23284e+07	1.40496e+07	1.40036e+07	1.24453e+07	1.10096e+07	1.11535e+07	1.3796e+07	1.22882e+07	1.42322e+07	--	--	--	-	-	-	-
Com_3562_neg	PA (3:0/22:2)	--	C28 H51 O8 P	6.069	545.333	7.33995e+06	7.70904e+06	6.21779e+06	7.28797e+06	8.94547e+06	9.63787e+06	4.24879e+06	4.64369e+06	6.78146e+06	7.61753e+06	6.84845e+06	7.71639e+06	5.86988e+06	7.50107e+06	7.91811e+06	--	--	--	-	-	-	-
Com_7120_neg	DGDG (18:3/24:4)	--	C57 H94 O15	8.159	1063.65	796742	1.24565e+06	1.25701e+06	1.18824e+06	2.74862e+06	1.84451e+06	1.59534e+06	1.6734e+06	1.86645e+06	1.13293e+06	2.08836e+06	2.65586e+06	2.22283e+06	1.34877e+06	1.84016e+06	--	--	--	-	-	-	-
Com_1624_neg	4-amino-2-(4-chlorophenyl)-6-(methylthio)pyrimidine-5-carbonitrile	--	C12 H9 Cl N4 S	1.702	275.021	8.59438e+06	7.52061e+06	2.10106e+07	1.35587e+07	1.68699e+07	1.89497e+07	2.65947e+07	2.92889e+07	9.09509e+06	9.46798e+06	1.74973e+07	7.93462e+06	1.15951e+07	1.58556e+07	1.67661e+07	--	--	--	-	-	-	-
Com_7584_neg	--	D-Proline	C5 H9 N O2	1.374	114.056	1.89046e+06	1.601e+06	2.03252e+06	1.96127e+06	1.31511e+06	1.4191e+06	1.69634e+06	1.40752e+06	1.63633e+06	2.17572e+06	1.06655e+06	1.11763e+06	1.42084e+06	1.45475e+06	1.99251e+06	Carboxylic acids and derivatives	344-25-2	HMDB0003411	C00763	ko01100//Metabolic pathways;ko00330//Arginine and proline metabolism	Amino acid metabolism;Global and overview maps	Metabolism
Com_4505_neg	FAHFA (18:2/18:3)	--	C36 H60 O4	10.119	555.439	5.99353e+06	5.16235e+06	4.65648e+06	4.18263e+06	6.51149e+06	6.05291e+06	3.07623e+06	4.04903e+06	2.75625e+06	3.2083e+06	3.37612e+06	1.23858e+06	4.71847e+06	4.14759e+06	5.55882e+06	--	--	--	-	-	-	-
Com_4029_neg	Camelliaside B	--	C32 H38 O19	5.449	725.192	3.5716e+06	3.19836e+06	1.70849e+06	2.11612e+06	5.67655e+06	8.1038e+06	5.02259e+06	3.59329e+06	2.15938e+06	3.10188e+06	2.28442e+06	1.74951e+06	3.46652e+06	3.58665e+06	3.02104e+06	Flavonoids	131573-90-5	HMDB0038767	-	-	-	-
Com_1905_neg	L-Homocysteic acid	--	C4 H9 N O5 S	5.775	182.009	1.87035e+07	1.86777e+07	1.16932e+07	1.25211e+07	2.28282e+07	2.21276e+07	1.30388e+07	1.21759e+07	1.55903e+07	1.24912e+07	1.82647e+07	1.26697e+07	1.86405e+07	1.55808e+07	2.08191e+07	Carboxylic acids and derivatives	14857-77-3	HMDB0002205	-	-	-	-
Com_5906_neg	--	2-Ethyl-3-hydroxy-4H-pyran-4-one	C7 H8 O3	4.626	139.04	1.11492e+06	1.36578e+06	2.18058e+06	2.26109e+06	3.33874e+06	2.70809e+06	3.63573e+06	4.19645e+06	3.46021e+06	3.28839e+06	3.90529e+06	3.72322e+06	3.02439e+06	2.75138e+06	2.46398e+06	--	--	--	-	-	-	-
Com_7505_neg	Cratoxylone	--	C24 H28 O7	7.655	427.171	876700	881779	750551	1.1338e+06	1.99751e+06	2.51452e+06	1.26011e+06	1.22451e+06	909625	976567	1.51315e+06	1.56161e+06	1.48418e+06	1.17533e+06	1.48209e+06	--	--	--	-	-	-	-
Com_5902_neg	--	7-Epitaxol	C47 H51 N O14	5.323	852.321	1.93777e+06	1.36063e+06	287445	187178	1.06891e+06	1.96847e+06	3.89229e+06	4.20148e+06	1.69014e+06	1.69986e+06	284661	282637	1.76859e+06	1.22781e+06	983619	Prenol lipids	33069-62-4	HMDB0015360	C07394	ko01100//Metabolic pathways;ko01110//Biosynthesis of secondary metabolites;ko00904//Diterpenoid biosynthesis	Global and overview maps;Metabolism of terpenoids and polyketides	Metabolism
Com_4259_neg	(3β,9ξ)-3,14-Dihydroxycarda-5,20(22)-dienolide	--	C23 H32 O4	5.238	371.23	4.51849e+06	4.55129e+06	4.0512e+06	4.28333e+06	2.44325e+06	2.24668e+06	7.38117e+06	7.0192e+06	3.94371e+06	4.60416e+06	2.71521e+06	2.18403e+06	3.86798e+06	3.79564e+06	3.89862e+06	--	--	--	-	-	-	-
Com_4209_neg	FAHFA (18:2/5:0)	--	C23 H40 O4	7.711	379.285	6.90137e+06	6.45257e+06	4.72036e+06	4.41535e+06	2.53949e+06	2.59912e+06	3.34784e+06	3.69859e+06	3.12326e+06	3.43166e+06	2.77198e+06	3.07993e+06	4.50991e+06	3.62823e+06	4.03463e+06	--	--	--	-	-	-	-
Com_9391_neg	Cer-NP (t19:1/38:2)	--	C57 H109 N O4	1.125	930.847	1.03287e+06	604050	495117	376268	58934.6	260477	333485	349220	742157	1.13604e+06	413916	370183	372689	365542	450328	--	--	--	-	-	-	-
Com_3299_neg	PA (3:0/22:6)	--	C28 H43 O8 P	5.49	537.254	9.8727e+06	6.29627e+06	5.94046e+06	8.24788e+06	5.7754e+06	5.78304e+06	5.7995e+06	7.19023e+06	6.34128e+06	9.11727e+06	8.09762e+06	7.11624e+06	7.05283e+06	7.50104e+06	8.25272e+06	--	--	--	-	-	-	-
Com_9855_neg	FAHFA (2:0/16:2)	--	C18 H30 O4	4.864	309.208	833496	741428	649553	534855	775832	882751	568140	915552	764003	873317	686195	760589	461652	572913	844449	--	--	--	-	-	-	-
Com_3046_neg	Licochalcone A	--	C21 H22 O4	6.547	337.148	436167	440046	8.94159e+06	1.03378e+07	424130	439944	367052	395785	446765	484580	406934	407250	1.84698e+06	1.85094e+06	1.82712e+06	Linear 1,3-diarylpropanoids	58749-22-7	HMDB0029514	-	-	-	-
Com_2839_neg	Ginkgolide J	--	C20 H24 O10	6.061	423.13	5.0191e+06	6.24367e+06	8.01154e+06	4.00149e+06	1.29865e+07	1.16e+07	6.42801e+06	7.7826e+06	8.30068e+06	7.40901e+06	1.28215e+07	1.2341e+07	1.26915e+07	7.455e+06	1.1151e+07	Prenol lipids	107438-79-9	HMDB0029605	-	-	-	-
Com_6114_neg	PA (18:2/16:4)	--	C37 H61 O8 P	8.318	663.409	3.55455e+06	3.44517e+06	3.05907e+06	2.90141e+06	2.93377e+06	2.78264e+06	951539	1.244e+06	2.60862e+06	2.09061e+06	996083	1.4924e+06	2.27326e+06	2.01509e+06	2.54951e+06	--	--	--	-	-	-	-
Com_6938_neg	--	L-serine	C3 H7 N O3	1.259	104.035	2.45666e+06	2.65923e+06	1.59023e+06	1.5411e+06	1.63032e+06	1.75856e+06	1.76617e+06	1.58635e+06	1.71617e+06	1.48061e+06	1.81685e+06	1.94808e+06	2.35979e+06	1.8877e+06	1.97051e+06	Carboxylic acids and derivatives	56-45-1	HMDB0000187	C00065	ko01100//Metabolic pathways;ko01110//Biosynthesis of secondary metabolites;ko01120//Microbial metabolism in diverse environments;ko01130//Biosynthesis of antibiotics;ko01230//Biosynthesis of amino acids;ko02010//ABC transporters;ko01200//Carbon metabolism;ko00970//Aminoacyl-tRNA biosynthesis;ko00270//Cysteine and methionine metabolism;ko00630//Glyoxylate and dicarboxylate metabolism;ko00260//Glyc…	Amino acid metabolism;Biosynthesis of other secondary metabolites;Carbohydrate metabolism;Drug resistance;Energy metabolism;Global and overview maps;Lipid metabolism;Membrane transport;Metabolism of other amino acids;Translation	Environmental Information Processing;Genetic Information Processing;Human Diseases;Metabolism
Com_2940_neg	13,14-Dihydro-15-keto Prostaglandin A2	--	C20 H30 O4	7.28	369.181	7.34626e+06	9.11721e+06	6.93641e+06	5.90424e+06	8.3069e+06	9.52667e+06	9.45127e+06	1.33109e+07	5.88534e+06	6.59404e+06	5.13077e+06	7.98432e+06	8.81123e+06	9.63024e+06	9.82229e+06	--	--	--	-	-	-	-
Com_9393_neg	--	Glabrene	C20 H18 O4	7.672	321.113	121635	126232	121598	130523	1.09845e+06	1.2088e+06	229229	253955	127632	120111	305530	228578	171588	155698	161412	Isoflavonoids	60008-03-9	HMDB0029530	-	-	-	-
Com_126_neg	--	Ixoside	C16 H20 O11	5.059	387.093	2.65554e+08	2.47954e+08	5.71834e+08	5.64931e+08	4.57316e+08	4.44362e+08	5.68547e+08	5.82333e+08	6.15754e+08	6.04672e+08	4.18206e+08	4.13258e+08	4.63179e+08	4.37036e+08	5.19698e+08	--	--	--	-	-	-	-
Com_2530_neg	SM (d14:1/27:0)	--	C46 H93 N2 O6 P	10.989	845.675	385962	374767	1.35468e+07	351335	1.41928e+07	410736	414092	367175	413521	425529	426972	435026	331740	387468	466064	--	--	--	-	-	-	-
Com_146_neg	--	Methylenesuccinic acid	C5 H6 O4	1.402	129.019	4.21296e+08	4.09796e+08	4.58831e+08	3.94691e+08	3.99801e+08	4.18937e+08	4.00042e+08	4.31995e+08	4.95052e+08	5.22567e+08	4.73897e+08	5.31935e+08	4.33951e+08	3.81646e+08	4.57777e+08	Fatty Acyls	97-65-4	HMDB0002092	C00490	ko00660//C5-Branched dibasic acid metabolism	Carbohydrate metabolism	Metabolism
Com_6062_neg	--	Ferulaldehyde	C10 H10 O3	5.26	177.055	3.53022e+06	3.00146e+06	2.42404e+06	2.36314e+06	3.41406e+06	2.73573e+06	3.5878e+06	2.85336e+06	3.05502e+06	3.15423e+06	3.93157e+06	2.45849e+06	2.26251e+06	2.56732e+06	2.92448e+06	Benzene and substituted derivatives	-	HMDB0141782	C02666	ko01100//Metabolic pathways;ko01110//Biosynthesis of secondary metabolites;ko00940//Phenylpropanoid biosynthesis	Biosynthesis of other secondary metabolites;Global and overview maps	Metabolism
Com_1069_neg	Prostaglandin D3	--	C20 H30 O5	6.963	331.189	3.91523e+07	3.38537e+07	3.1714e+07	2.61407e+07	3.63413e+07	4.16795e+07	4.51757e+07	5.02078e+07	3.79763e+07	3.75099e+07	4.43751e+07	3.85897e+07	4.19897e+07	3.97639e+07	4.26258e+07	Fatty Acyls	71902-47-1	HMDB0003034	-	-	-	-
Com_355_neg	LPI 18:1	--	C27 H51 O12 P	11.679	597.305	1.0881e+08	1.37394e+08	1.34629e+08	1.20692e+08	1.08424e+08	1.51398e+08	1.56495e+08	9.2491e+07	1.92103e+08	1.44742e+08	1.0999e+08	1.9055e+08	1.60101e+08	1.07295e+08	1.32723e+08	--	--	--	-	-	-	-
Com_2566_neg	16-(Hexopyranosyloxy)-7-hydroxy-8,9-epoxypimaran-18-oic acid	--	C26 H42 O10	6.092	513.27	8.4201e+06	7.69176e+06	4.49383e+06	4.44869e+06	1.01143e+07	8.87165e+06	3.53776e+06	5.35983e+06	4.12691e+06	5.96494e+06	1.51953e+07	1.5387e+07	8.76154e+06	7.59522e+06	8.72043e+06	--	--	--	-	-	-	-
Com_3813_neg	--	(-)-Catechin Gallate	C22 H18 O10	1.599	441.081	2.8271e+06	3.64406e+06	3.85978e+06	3.80406e+06	671401	736303	3.06729e+06	2.42112e+06	7.54789e+06	8.17192e+06	1.32494e+06	2.0652e+06	4.08765e+06	3.44249e+06	3.79187e+06	--	--	--	-	-	-	-
Com_8976_neg	Esculentoside A	--	C42 H66 O16	6.609	825.413	1.06876e+06	645646	513084	635415	1.42012e+06	1.37926e+06	459731	325096	545559	758668	836171	480506	1.18294e+06	701854	698589	Prenol lipids	65497-07-6	HMDB0034637	-	-	-	-
Com_4305_neg	Corticosterone	--	C21 H30 O4	7.608	345.203	5.59113e+06	5.11602e+06	4.47022e+06	4.74337e+06	3.62974e+06	5.54966e+06	4.46606e+06	6.54266e+06	3.82849e+06	6.4948e+06	3.91536e+06	4.33609e+06	5.52937e+06	6.5956e+06	5.99616e+06	Steroids and steroid derivatives	50-22-6	HMDB0001547	C02140	ko01100//Metabolic pathways	Global and overview maps	Metabolism
Com_4738_neg	Hesperidin	--	C28 H34 O15	5.295	609.181	4.60734e+06	4.18683e+06	4.19347e+06	4.13994e+06	5.39629e+06	6.23425e+06	4.13932e+06	5.42505e+06	5.49678e+06	5.44375e+06	5.58364e+06	5.27653e+06	4.91179e+06	4.66934e+06	5.33107e+06	Flavonoids	520-26-3	HMDB0003265	-	-	-	-
Com_7421_neg	PA (8:0/22:6)	--	C33 H53 O8 P	7.053	607.348	2.11167e+06	1.98493e+06	2.13371e+06	1.70062e+06	1.00982e+06	1.2056e+06	994673	1.21687e+06	1.5041e+06	1.62224e+06	1.16627e+06	1.47709e+06	1.40235e+06	1.14156e+06	1.52632e+06	--	--	--	-	-	-	-
Com_9107_neg	Arachidic acid	--	C20 H40 O2	11.68	311.296	245228	235959	263646	261322	1.3343e+06	1.38767e+06	217715	238135	176714	152588	176047	186558	388085	345274	421634	Fatty Acyls	506-30-9	HMDB0002212	C06425	ko01040//Biosynthesis of unsaturated fatty acids	Lipid metabolism	Metabolism
Com_3303_neg	--	Podophyllotoxin	C22 H22 O8	5.516	413.122	9.84453e+06	8.62595e+06	3.07696e+06	2.48829e+06	1.48441e+06	754529	4.11592e+06	4.7035e+06	3.02344e+06	3.12248e+06	7.90211e+06	7.49238e+06	4.83021e+06	4.26474e+06	4.98675e+06	Lignan lactones	-	HMDB0031452	C10874	ko01110//Biosynthesis of secondary metabolites	Global and overview maps	Metabolism
Com_5808_neg	Isomangiferin	--	C19 H18 O11	5.111	375.07	334007	349114	1.28354e+06	1.12004e+06	462579	394841	4.25649e+06	4.02281e+06	2.22908e+06	3.01271e+06	2.24177e+06	2.45608e+06	2.02377e+06	1.92997e+06	1.90224e+06	Benzopyrans	24699-16-9	HMDB0029477	-	-	-	-
Com_3332_neg	N1-[4-(2-thienylthio)phenyl]-4-chlorobenzamide	--	C17 H12 Cl N O S2	1.509	343.995	2.85207e+06	3.8396e+06	2.83369e+06	3.04816e+06	4.88275e+06	5.12179e+06	6.50143e+06	7.42249e+06	9.43633e+06	1.00731e+07	4.26167e+06	4.59985e+06	4.29075e+06	4.69614e+06	4.83187e+06	--	--	--	-	-	-	-
Com_1926_neg	PA (2:0/20:1)	--	C25 H47 O8 P	9.237	505.301	5.8851e+06	5.50161e+06	7.82199e+06	7.28524e+06	2.26e+07	2.26338e+07	7.91484e+06	8.66727e+06	4.36697e+06	3.44337e+06	7.22393e+06	6.13902e+06	9.40424e+06	9.94038e+06	1.0467e+07	--	--	--	-	-	-	-
Com_9159_neg	--	(+)-Camphor	C10 H16 O	7.079	151.112	1.22393e+06	1.17661e+06	988124	599273	850384	751851	663285	807117	794795	817007	1.12052e+06	819269	829457	829006	1.34527e+06	--	--	--	-	-	-	-
Com_4883_neg	N1-(3-amino-4-chlorophenyl)-2-[2,4-di(tert-pentyl)phenoxy]acetamide	--	C24 H33 Cl N2 O2	5.117	415.22	5.3853e+06	4.52413e+06	2.56429e+06	4.02327e+06	2.09653e+06	1.99359e+06	2.22286e+06	2.05764e+06	1.59319e+06	2.1647e+06	1.73055e+06	1.22533e+06	2.30451e+06	3.07141e+06	2.04354e+06	--	--	--	-	-	-	-
Com_9480_neg	SQDG (18:3/20:3)	--	C47 H78 O12 S	9.306	865.496	115587	256191	263085	369007	120639	270763	872308	666351	1.1031e+06	671519	613252	336900	383853	470667	391767	--	--	--	-	-	-	-
Com_2139_neg	--	4-Hydroxyphenylacetic acid	C8 H8 O3	5.458	151.04	1.84839e+07	1.78595e+07	1.6021e+07	1.62593e+07	1.39524e+07	1.31291e+07	1.82912e+07	1.69743e+07	1.4914e+07	1.36161e+07	1.02971e+07	8.97739e+06	1.2143e+07	1.42375e+07	1.5126e+07	Phenol esters	-	HMDB0060390	C00642	ko01120//Microbial metabolism in diverse environments;ko00360//Phenylalanine metabolism;ko00350//Tyrosine metabolism;ko01220//Degradation of aromatic compounds	Amino acid metabolism;Global and overview maps	Metabolism
Com_2975_neg	--	methyl oxo pentanoate	C6 H10 O3	5.415	129.055	6.65059e+06	6.14194e+06	6.79658e+06	6.79315e+06	1.10355e+07	1.2918e+07	6.37234e+06	6.81205e+06	5.46823e+06	6.926e+06	6.56691e+06	6.0182e+06	7.1766e+06	6.41966e+06	7.99887e+06	--	--	--	-	-	-	-
Com_6832_neg	LPA 16:1	--	C19 H37 O7 P	11.807	407.22	1.85429e+06	2.01292e+06	2.58308e+06	1.7924e+06	2.72021e+06	2.81607e+06	2.47663e+06	2.01692e+06	1.32864e+06	1.89315e+06	1.40143e+06	1.33422e+06	2.25592e+06	2.00383e+06	1.64837e+06	--	--	--	-	-	-	-
Com_4717_neg	LPG 16:2	--	C22 H41 O9 P	7.08	479.241	2.35064e+06	3.79545e+06	3.92577e+06	3.51162e+06	2.31301e+06	1.28141e+06	2.96644e+06	3.18659e+06	4.38581e+06	3.85607e+06	6.16709e+06	5.70958e+06	4.34287e+06	2.57669e+06	4.95619e+06	--	--	--	-	-	-	-
Com_6819_neg	SQDG (18:5/22:5)	--	C49 H74 O12 S	9.292	885.483	746840	626761	964678	1.09648e+06	1.0777e+06	973373	2.86407e+06	3.1488e+06	1.57099e+06	1.46203e+06	1.11138e+06	899408	1.29684e+06	1.39344e+06	720084	--	--	--	-	-	-	-
Com_1922_neg	LPG 14:1	--	C20 H39 O9 P	5.744	453.225	2.12384e+07	1.5355e+07	6.77526e+06	8.84293e+06	1.70484e+07	1.72228e+07	6.90279e+06	6.83629e+06	1.32227e+07	1.27651e+07	1.01533e+07	9.85812e+06	9.61814e+06	1.08916e+07	7.19903e+06	--	--	--	-	-	-	-
Com_8544_neg	PA (18:2/18:3)	--	C39 H67 O8 P	7.757	693.438	818360	822924	552943	749341	1.0812e+06	663607	877256	909856	1.67288e+06	738493	636361	531911	727115	745609	784651	--	--	--	-	-	-	-
Com_4339_neg	7-Ethylcamptothecin	--	C22 H20 N2 O4	4.604	375.13	4.17145e+06	3.7912e+06	3.42297e+06	6.00889e+06	6.32622e+06	7.09944e+06	4.17214e+06	3.86083e+06	4.46036e+06	2.77181e+06	6.12316e+06	5.71499e+06	4.99223e+06	4.67815e+06	3.93199e+06	--	--	--	-	-	-	-
Com_3718_neg	LPS 17:1	--	C23 H44 N O9 P	7.606	508.268	8.18704e+06	6.99228e+06	4.2662e+06	3.73536e+06	2.08593e+06	2.76587e+06	2.16623e+06	1.52878e+06	1.83312e+06	2.05014e+06	3.00583e+06	2.24715e+06	4.15544e+06	3.28476e+06	3.66915e+06	--	--	--	-	-	-	-
Com_878_neg	--	Arabidopyl ketoadipic acid	C15 H14 O9	5.357	337.057	1.14816e+07	1.31098e+07	3.89135e+07	3.84789e+07	5.41288e+07	4.94577e+07	5.79794e+07	5.85725e+07	4.66659e+07	5.11841e+07	6.30137e+07	5.55978e+07	4.12797e+07	4.47137e+07	5.23843e+07	--	--	--	-	-	-	-
Com_3006_neg	FAHFA (18:2/16:0)	--	C34 H62 O4	10.123	533.457	9.77715e+06	9.48467e+06	1.05569e+07	9.68615e+06	1.22497e+07	1.23189e+07	5.03895e+06	4.96593e+06	4.04472e+06	4.62204e+06	4.15719e+06	3.45528e+06	8.79098e+06	7.48884e+06	8.66112e+06	--	--	--	-	-	-	-
Com_8598_neg	PI (16:0/18:5)	--	C43 H73 O13 P	10.147	827.466	1.41025e+06	1.36215e+06	1.3053e+06	1.08942e+06	881059	1.47634e+06	765575	608259	1.63574e+06	1.15208e+06	1.23343e+06	1.28333e+06	1.50135e+06	1.39468e+06	1.00859e+06	--	--	--	-	-	-	-
Com_3843_neg	Thromboxane B3	--	C20 H32 O6	6.492	367.212	7.80929e+06	5.54234e+06	2.72106e+06	3.05237e+06	2.08935e+06	3.26565e+06	3.58476e+06	5.19804e+06	4.15003e+06	3.69919e+06	3.40086e+06	4.19484e+06	2.87917e+06	3.04777e+06	3.496e+06	Fatty Acyls	71953-80-5	HMDB0005099	-	-	-	-
Com_4904_neg	LPC 20:3	--	C28 H52 N O7 P	8.818	590.345	624374	991584	4.88141e+06	1.96152e+06	1.60267e+06	1.7861e+06	719507	414466	2.76446e+06	964314	1.34682e+06	1.6299e+06	2.44146e+06	2.30642e+06	2.10313e+06	--	--	--	-	-	-	-
Com_1963_neg	LPS 18:1	--	C24 H46 N O9 P	11.409	522.284	1.80967e+07	1.87752e+07	1.25305e+07	1.34859e+07	8.83211e+06	9.80767e+06	1.24132e+07	1.28124e+07	2.08601e+07	2.14157e+07	1.3626e+07	1.47804e+07	1.50808e+07	1.5512e+07	1.47804e+07	--	--	--	-	-	-	-
Com_2490_neg	Neohesperidin	--	C28 H34 O15	5.076	609.18	2.68771e+06	1.75726e+06	1.60875e+06	1.24538e+06	8.87642e+06	1.01291e+07	9.45291e+06	5.35422e+06	2.53738e+06	2.24723e+06	1.54051e+07	1.60688e+07	4.31652e+06	6.15429e+06	7.4942e+06	Flavonoids	13241-33-3	HMDB0030748	C09806	ko00941//Flavonoid biosynthesis	Biosynthesis of other secondary metabolites	Metabolism
Com_824_neg	LPA 17:0	--	C20 H41 O7 P	5.853	423.25	6.33498e+07	5.67486e+07	1.07713e+07	1.81178e+06	1.05717e+07	1.07922e+07	1.96599e+06	2.23372e+06	3.84119e+07	3.81989e+07	3.41334e+06	2.29106e+06	2.00532e+07	1.84602e+07	2.24877e+07	--	--	--	-	-	-	-
Com_5051_neg	PA (4:0/20:2)	--	C27 H49 O8 P	9.488	531.315	1.58609e+06	1.54173e+06	2.36145e+06	2.29727e+06	4.7678e+06	3.44883e+06	1.67678e+06	5.59917e+06	1.9012e+06	1.94188e+06	1.84026e+06	2.4569e+06	2.19122e+06	1.4072e+06	1.29121e+06	--	--	--	-	-	-	-
Com_1768_neg	--	Rehmannioside D	C27 H42 O20	9.829	685.219	1.60489e+07	1.55236e+07	1.34696e+07	1.21865e+07	1.79925e+07	1.23557e+07	1.67518e+07	2.1591e+07	1.86697e+07	1.41707e+07	2.55315e+07	1.30523e+07	1.64855e+07	1.44681e+07	1.88315e+07	--	--	--	-	-	-	-
Com_4154_neg	--	MGMG (18:2)	C27 H48 O9	6.038	515.322	5.98286e+06	6.07804e+06	3.243e+06	4.86757e+06	7.50863e+06	6.44359e+06	3.1422e+06	4.09252e+06	5.48066e+06	5.3399e+06	6.59259e+06	6.53024e+06	5.60283e+06	6.63372e+06	4.77639e+06	--	--	--	-	-	-	-
Com_9830_neg	--	3-Dehydroshikimic acid	C7 H8 O5	1.381	171.029	477278	420000	469807	639553	544854	947742	684930	737029	532756	511174	683717	420087	446928	560743	560893	--	--	--	-	-	-	-
Com_3566_neg	Carboxyatractyloside	--	C31 H46 O18 S2	5.039	769.203	1.76528e+06	1.75159e+06	7.95802e+06	1.45608e+06	5.34495e+06	6.02931e+06	1.52184e+06	1.70835e+06	1.31912e+06	7.53264e+06	6.33564e+06	7.05246e+06	4.75783e+06	4.0039e+06	4.15872e+06	--	--	--	-	-	-	-
Com_8157_neg	Rosmarinic acid	--	C18 H16 O8	5.344	359.075	1.15772e+06	947683	1.67285e+06	1.47821e+06	762163	708648	1.08269e+06	1.06599e+06	854745	1.60182e+06	840525	707409	664314	784066	1.04475e+06	Cinnamic acids and derivatives	537-15-5	HMDB0003572	C01850	ko00350//Tyrosine metabolism	Amino acid metabolism	Metabolism
Com_8826_neg	FAHFA (16:0/18:2)	--	C34 H62 O4	10.472	533.454	383148	396600	373968	413885	365283	436739	1.13257e+06	1.17008e+06	583069	644252	534974	378000	1.42982e+06	952502	1.16865e+06	--	--	--	-	-	-	-
Com_9815_neg	N-Oleoyl dopamine	--	C26 H43 N O3	10.428	462.323	96081.2	86399.1	76470.3	92802.2	922827	858149	210693	286782	105510	101137	185899	269818	337791	299210	456802	--	--	--	-	-	-	-
Com_10022_neg	--	Methyl-Hesperidin	C29 H38 O16	5.001	641.208	752461	515838	457783	498173	435984	426577	469874	347003	410986	381265	470555	712269	436637	515648	628509	--	--	--	-	-	-	-
Com_7043_neg	--	Eriodictyol O-malonylhexoside	C24 H24 O14	5.396	535.11	294226	386271	276523	274562	820201	1.04324e+06	359237	393237	354886	377889	2.36306e+06	2.80409e+06	622032	793694	533393	--	--	--	-	-	-	-
Com_92_neg	(±)13-HODE	--	C18 H32 O3	6.588	295.227	8.17136e+08	9.02237e+08	5.49421e+08	8.55521e+08	6.0841e+08	6.61006e+08	2.40068e+08	6.56266e+08	1.04027e+09	9.34799e+08	8.04743e+08	7.40926e+08	7.36874e+08	7.78757e+08	7.91536e+08	--	--	--	-	-	-	-
Com_5729_neg	LPS 20:0	--	C26 H52 N O9 P	7.815	552.324	3.98879e+06	3.44823e+06	510064	2.2713e+06	1.75205e+06	2.37235e+06	1.25665e+06	1.29961e+06	2.01762e+06	2.00402e+06	2.01849e+06	1.97781e+06	2.2128e+06	2.16463e+06	2.17062e+06	--	--	--	-	-	-	-
Com_3527_neg	MGDG (2:0/3:0)	--	C14 H24 O10	4.966	411.15	8.1615e+06	8.66074e+06	4.02935e+06	4.09323e+06	8.03224e+06	7.81126e+06	6.2026e+06	5.41852e+06	7.62445e+06	8.1215e+06	7.25629e+06	8.34618e+06	5.73275e+06	6.28519e+06	8.04904e+06	--	--	--	-	-	-	-
Com_5878_neg	Psoralidin	--	C20 H16 O5	5.262	335.089	1.51429e+06	1.52551e+06	1.85569e+06	2.21723e+06	2.78615e+06	4.21856e+06	3.56327e+06	2.35558e+06	1.96717e+06	2.2127e+06	1.35599e+06	1.55961e+06	1.91383e+06	1.66505e+06	1.95388e+06	Isoflavonoids	18642-23-4	HMDB0034050	-	-	-	-
Com_8606_neg	AcylGlcADG (16:3-16:4-16:4)	--	C57 H84 O12	9.898	959.585	918984	937067	804370	713441	1.64891e+06	1.22337e+06	594875	722600	748203	703218	729116	460183	671537	612765	1.07809e+06	--	--	--	-	-	-	-
Com_426_neg	MGDG (2:0/16:3)	--	C27 H44 O10	6.246	587.307	1.31325e+08	1.40418e+08	2.96822e+07	3.12576e+07	6.41823e+07	6.93948e+07	2.37535e+07	1.90354e+07	3.47415e+07	3.86772e+07	8.58645e+07	8.12493e+07	6.71222e+07	4.5602e+07	6.57368e+07	--	--	--	-	-	-	-
Com_5788_neg	MGDG (17:1/18:3)	--	C44 H76 O10	8.381	823.56	1.83151e+06	1.44244e+06	1.61394e+06	1.44599e+06	844586	659462	4.28271e+06	3.73487e+06	3.43531e+06	3.75157e+06	1.77027e+06	1.41456e+06	2.83823e+06	2.78563e+06	2.77768e+06	--	--	--	-	-	-	-
Com_3512_neg	OxPG (18:0-18:2+2O)	--	C42 H79 O12 P	9.213	805.51	2.04697e+06	1.86917e+06	1.62745e+06	1.17763e+06	2.17273e+06	2.21039e+06	9.75271e+06	9.61981e+06	6.89786e+06	5.38815e+06	2.99348e+06	2.9479e+06	3.19147e+06	3.86791e+06	3.52678e+06	--	--	--	-	-	-	-
Com_6264_neg	FAHFA (18:2/20:4)	--	C38 H62 O4	10.098	581.456	546607	1.80972e+06	2.23355e+06	1.63589e+06	2.90715e+06	2.97293e+06	3.27222e+06	3.75532e+06	1.06695e+06	1.41561e+06	494599	839933	1.86829e+06	1.94263e+06	2.88632e+06	--	--	--	-	-	-	-
Com_325_neg	Gentiopicrin	--	C16 H20 O9	5.243	355.103	1.22795e+08	1.23864e+08	9.12049e+07	1.01451e+08	1.89934e+08	4.74902e+07	2.26823e+08	2.18696e+08	2.01838e+08	2.0993e+08	8.38489e+07	8.25857e+07	1.33715e+08	1.52708e+08	1.63538e+08	--	--	--	C09782	ko01110//Biosynthesis of secondary metabolites	Global and overview maps	Metabolism
Com_1506_neg	19(R)-Hydroxy-prostaglandin E2	--	C20 H32 O6	6.581	349.202	2.68276e+07	2.54974e+07	2.1856e+07	1.99135e+07	2.6783e+07	3.23044e+07	1.73936e+07	2.43287e+07	2.02818e+07	2.53965e+07	1.52111e+07	2.71207e+07	2.43965e+07	2.64562e+07	1.68317e+07	Fatty Acyls	55123-68-7	HMDB0001908	-	-	-	-
Com_2232_neg	--	14,15-Dehydrocrepenynic acid	C18 H28 O2	7.111	275.201	9.9731e+06	1.04392e+07	9.84798e+06	1.28439e+07	9.83483e+06	1.11539e+07	1.36448e+07	1.51122e+07	1.70364e+07	1.82469e+07	1.37035e+07	1.33898e+07	1.26338e+07	1.13289e+07	1.34674e+07	--	--	--	-	-	-	-
Com_29_neg	2,3-Dinor-8-epi-prostaglandin F2α	--	C18 H30 O5	6.028	325.202	3.3773e+09	2.80787e+09	2.23701e+09	4.03022e+09	2.70665e+09	2.30959e+09	2.20939e+09	2.40164e+09	2.33927e+09	2.12636e+09	2.4522e+09	2.51758e+09	2813033437	2.71214e+09	2.7075e+09	--	--	--	-	-	-	-
Com_4989_neg	Engeletin	--	C21 H22 O10	5.507	433.115	863887	3.96975e+06	741838	876984	2.15515e+06	2.36606e+06	5.64325e+06	2.4827e+06	744287	669974	2.66514e+06	3.03261e+06	1.81899e+06	1.54904e+06	1.39529e+06	--	--	--	-	-	-	-
Com_2479_neg	--	4-Acetamidobutyric Acid	C6 H11 N O3	1.365	144.066	9.65341e+06	1.18558e+07	1.39381e+07	1.0888e+07	2.86646e+06	2.89822e+06	8.09267e+06	6.99366e+06	1.32904e+07	7.4395e+06	4.62718e+06	4.59804e+06	5.42646e+06	6.29395e+06	8.28354e+06	Carboxylic acids and derivatives	3025-96-5	HMDB0003681	C02946	ko01100//Metabolic pathways;ko00330//Arginine and proline metabolism	Amino acid metabolism;Global and overview maps	Metabolism
Com_9377_neg	--	Limocitrin O-hexoside	C23 H24 O13	5.137	507.114	460860	296366	223247	231711	872860	1.2152e+06	1.08845e+06	791312	222826	244551	1.12273e+06	1.03449e+06	599213	775533	569667	--	--	--	-	-	-	-
Com_7865_neg	PI (15:0/22:6)	--	C46 H77 O13 P	8.511	867.512	214307	189807	298476	170307	405992	340152	2.04846e+06	1.14655e+06	2.15048e+06	1.59013e+06	936684	658617	698583	699055	822637	--	--	--	-	-	-	-
Com_3680_neg	Epicatechin	--	C15 H14 O6	2.272	289.068	4.09117e+06	6.54079e+06	7.60757e+06	4.98182e+06	5.60441e+06	3.56984e+06	4.51757e+06	5.13575e+06	3.31919e+06	3.78853e+06	4.41483e+06	4.41884e+06	3.37466e+06	4.70806e+06	3.41626e+06	Flavonoids	18829-70-4	HMDB0037953	C09727	ko01110//Biosynthesis of secondary metabolites;ko00941//Flavonoid biosynthesis	Biosynthesis of other secondary metabolites;Global and overview maps	Metabolism
Com_21_neg	2-Oxoglutaric acid	--	C5 H6 O5	1.402	191.019	4.63524e+09	4.26212e+09	4.85307e+09	4.37942e+09	4.61739e+09	4.99338e+09	4.84102e+09	4.9615e+09	5.2168e+09	5.6277e+09	5.38041e+09	5.60087e+09	5.07678e+09	4.87599e+09	5.33233e+09	Keto acids and derivatives	328-50-7	HMDB0000208	C00026	ko01100//Metabolic pathways;ko01110//Biosynthesis of secondary metabolites;ko01120//Microbial metabolism in diverse environments;ko01130//Biosynthesis of antibiotics;ko01230//Biosynthesis of amino acids;ko01200//Carbon metabolism;ko01210//2-Oxocarboxylic acid metabolism;ko00250//Alanine, aspartate and glutamate metabolism;ko00220//Arginine biosynthesis;ko00630//Glyoxylate and dicarboxylate metabo…	Amino acid metabolism;Carbohydrate metabolism;Global and overview maps;Metabolism of other amino acids	Metabolism
Com_10117_neg	PS (20:2/18:3)	--	C44 H76 N O10 P	10.28	808.514	185565	144108	211655	376443	746162	638175	529801	358678	335152	300516	461710	420257	376461	356290	326066	--	--	--	-	-	-	-
Com_3061_neg	LPG 19:2	--	C25 H47 O9 P	8.248	521.296	5.06926e+06	2.21619e+06	2.37796e+06	2.58939e+06	6.19475e+06	5.39797e+06	1.21579e+07	1.23243e+07	8.10142e+06	1.08501e+07	6.62558e+06	5.91304e+06	5.9739e+06	6.02642e+06	8.44027e+06	--	--	--	-	-	-	-
Com_5436_neg	PA (2:0/20:4)	--	C25 H41 O8 P	5.572	499.255	4.39317e+06	4.16141e+06	3.5799e+06	3.79881e+06	2.8471e+06	2.40715e+06	2.43518e+06	2.68123e+06	3.76881e+06	3.56762e+06	2.67022e+06	3.04414e+06	2.63568e+06	3.95867e+06	3.08593e+06	--	--	--	-	-	-	-
Com_4462_neg	N1-[1-(3-isopropenylphenyl)-1-methylethyl]-3-oxobutanamide	--	C16 H21 N O2	4.964	258.146	6.2039e+06	5.21435e+06	4.92629e+06	4.49219e+06	2.17887e+06	2.07279e+06	4.37013e+06	4.02682e+06	2.75822e+06	2.78245e+06	2.47031e+06	2.13944e+06	2.90734e+06	3.23591e+06	3.78967e+06	--	--	--	-	-	-	-
Com_9231_neg	16-Glucuronide-estriol	--	C24 H32 O9	5.956	463.194	444408	781551	1.08601e+06	898324	333890	345845	536296	590222	1.07812e+06	633868	380457	383440	392566	397245	440127	Steroids and steroid derivatives	1852-50-2	HMDB0006766	-	-	-	-
Com_2504_neg	Mulberroside A	--	C26 H32 O14	5.131	567.172	6.09685e+06	3.83902e+06	3.02253e+06	1.82874e+06	1.59797e+07	1.4046e+07	7.06929e+06	6.99294e+06	4.68164e+06	3.87945e+06	1.13556e+07	7.58067e+06	7.21524e+06	5.66719e+06	6.94894e+06	--	--	--	-	-	-	-
Com_2677_neg	Oxypaeoniflorin	--	C23 H28 O12	5.309	495.15	2.58245e+06	2.01143e+06	2.11197e+06	1.94934e+06	2.61915e+06	2.30616e+06	2.68413e+06	2.1061e+06	2.09992e+06	2.31548e+06	1.49862e+07	1.28752e+07	3.51429e+06	3.74968e+06	4.15399e+06	--	--	--	-	-	-	-
Com_9619_neg	--	Tenuifoliside A	C31 H38 O17	5.117	681.203	362357	316397	505964	797044	113110	331375	398785	346873	108715	143658	1.05163e+06	239533	478405	415621	453492	--	--	--	-	-	-	-
Com_4489_neg	Paeoniflorin	--	C23 H28 O11	5.1	479.167	2.0666e+06	975105	990280	932655	3.70643e+06	4.07941e+06	1.20628e+06	1.82523e+06	1.57167e+06	1.41222e+06	6.66716e+06	6.24919e+06	2.2574e+06	2.12521e+06	1.10742e+06	--	--	--	-	-	-	-
Com_967_neg	PA (2:0/16:1)	--	C21 H39 O8 P	5.375	449.239	4.12536e+07	4.10467e+07	4.59656e+07	3.98314e+07	5.39431e+07	5.68579e+07	4.64858e+07	4.04403e+07	4.95493e+07	5.19161e+07	4.46994e+07	4.65748e+07	4.14498e+07	3.99454e+07	5.10041e+07	--	--	--	-	-	-	-
Com_3591_neg	--	2-Hydroxy-2-methylbutanoic acid	C5 H10 O3	5.228	117.055	3.01577e+06	2.68793e+06	1.46712e+06	7.95026e+06	1.85081e+06	1.7899e+06	2.60253e+06	2.41549e+06	1.82178e+06	1.92717e+06	1.64819e+06	1.51937e+06	2.02589e+06	1.71521e+06	2.07263e+06	Fatty Acyls	3739-30-8	HMDB0001987	-	-	-	-
Com_890_neg	LPA 16:3	--	C19 H33 O7 P	6.217	403.197	5.73946e+07	5.42756e+07	2.5921e+07	2.80729e+07	1.36477e+07	1.26708e+07	3.94769e+07	4.24714e+07	1.50344e+07	1.67016e+07	3.06789e+07	3.36955e+07	3.23297e+07	3.14863e+07	3.28699e+07	--	--	--	-	-	-	-
Com_7962_neg	Isobutyrylshikonin	--	C20 H22 O6	7.836	361.134	588577	930185	614606	831734	1.79316e+06	2.17112e+06	565739	391650	1.07132e+06	1.50374e+06	423149	573880	786253	775542	886469	--	--	--	-	-	-	-
Com_6985_neg	--	Lysopc 14:0	C22 H46 N O7 P	8.429	466.293	1.95005e+06	1.73754e+06	1.96399e+06	1.78123e+06	2.87159e+06	2.60945e+06	1.55424e+06	2.10637e+06	1.14349e+06	1.22152e+06	1.97915e+06	2.19056e+06	1.57832e+06	1.76779e+06	1.63577e+06	--	--	--	-	-	-	-
Com_618_neg	Orcinol gentiobioside	--	C19 H28 O12	5.302	447.151	8.02639e+07	8.93613e+07	3.6079e+07	3.38859e+07	2.23701e+07	2.3162e+07	2.82533e+07	2.87642e+07	3.47826e+07	3.44192e+07	3.11183e+07	2.6038e+07	3.24683e+07	3.96726e+07	4.47869e+07	--	--	--	-	-	-	-
Com_909_neg	MGDG (4:0/22:3)	--	C35 H60 O10	6.107	685.416	5.60323e+07	4.63561e+07	3.74301e+07	4.12981e+07	2.25682e+07	2.45829e+07	1.47222e+07	1.66412e+07	1.18212e+07	3.36956e+07	2.29637e+07	2.23917e+07	3.13128e+07	3.01733e+07	3.61399e+07	--	--	--	-	-	-	-
Com_4867_neg	--	10-Deacetylasperulosidic acid	C16 H22 O11	4.971	389.109	5.42358e+06	1.30234e+06	2.01632e+06	2.13675e+06	3.77105e+06	3.21874e+06	2.65971e+06	3.39813e+06	3.37458e+06	3.42735e+06	4.45392e+06	3.81403e+06	2.74359e+06	3.60036e+06	3.90682e+06	--	--	--	-	-	-	-
Com_3142_neg	PE (18:2e/2:0)	--	C25 H48 N O7 P	9.006	504.309	5.64746e+06	5.94629e+06	7.07499e+06	7.55604e+06	9.08666e+06	1.12347e+07	7.67781e+06	8.4151e+06	1.13141e+07	1.07587e+07	5.94424e+06	6.19992e+06	8.2524e+06	8.54115e+06	8.93617e+06	--	--	--	-	-	-	-
Com_7569_neg	Dopamine	--	C8 H11 N O2	5.153	152.071	1.70138e+06	1.71966e+06	1.29704e+06	1.19336e+06	1.64734e+06	1.55357e+06	1.47432e+06	2.01103e+06	2.23271e+06	1.81513e+06	1.82735e+06	1.93263e+06	1.62317e+06	1.72269e+06	2.43787e+06	Phenols	62-31-7	HMDB0000073	C03758	ko01100//Metabolic pathways;ko01110//Biosynthesis of secondary metabolites;ko00350//Tyrosine metabolism;ko00950//Isoquinoline alkaloid biosynthesis;ko00965//Betalain biosynthesis	Amino acid metabolism;Biosynthesis of other secondary metabolites;Global and overview maps	Metabolism
Com_1443_neg	PA (2:0/22:6)	--	C27 H41 O8 P	5.475	523.24	2.15145e+07	2.11532e+07	2.83008e+07	2.81341e+07	1.9453e+07	1.97084e+07	2.14637e+07	1.89987e+07	2.33573e+07	2.53954e+07	2.48274e+07	2.0728e+07	2.09658e+07	2.14591e+07	2.34806e+07	--	--	--	-	-	-	-
Com_1699_neg	Eriocitrin	--	C27 H32 O15	5.186	595.168	2.29988e+07	2.42954e+07	1.48275e+07	1.50634e+07	6.98428e+06	7.8701e+06	1.04207e+07	2.24609e+07	1.84369e+07	1.74058e+07	1.63312e+07	1.53697e+07	1.74494e+07	1.9075e+07	1.22153e+07	Naphthalenes	13463-28-0	HMDB0005811	-	-	-	-
Com_4243_neg	PG (2:0/18:4)	--	C26 H43 O10 P	5.414	545.26	1.76441e+06	1.62185e+06	1.13951e+06	1.65926e+06	1.33393e+06	1.43997e+06	1.68891e+06	1.62973e+06	1.1478e+06	2.02405e+06	4.76956e+06	7.22502e+06	2.21311e+06	2.34361e+06	1.95434e+06	--	--	--	-	-	-	-
Com_1295_neg	PA (2:0/15:1)	--	C20 H37 O8 P	5.639	435.223	1.78304e+07	1.59692e+07	2.86209e+07	3.2702e+07	1.825e+07	1.92343e+07	1.98989e+07	2.07533e+07	2.35746e+07	2.32776e+07	2.3008e+07	1.99402e+07	2.15606e+07	2.17168e+07	2.53522e+07	--	--	--	-	-	-	-
Com_1377_neg	PA (2:0/21:0)	--	C26 H51 O8 P	6.162	521.333	1.92807e+07	1.7498e+07	2.25858e+07	2.55379e+07	3.54659e+07	3.27505e+07	1.57209e+07	1.55075e+07	2.41418e+07	2.4692e+07	2.27356e+07	2.01282e+07	2.2516e+07	2.46473e+07	2.25207e+07	--	--	--	-	-	-	-
Com_4693_neg	PA (16:2/18:5)	--	C37 H59 O8 P	8.209	661.394	1.09134e+06	1.08089e+06	1.29044e+06	1.23172e+06	6.1056e+06	6.02823e+06	2.89432e+06	2.66294e+06	1.7563e+06	2.12669e+06	3.39142e+06	4.54027e+06	2.68673e+06	2.40301e+06	3.08114e+06	--	--	--	-	-	-	-
Com_9229_neg	--	Myristoleic Acid	C14 H26 O2	9.215	225.186	1.06208e+06	979578	485339	493847	1.26747e+06	1.09972e+06	273527	320182	246135	270386	416154	315872	619864	633338	651210	Fatty Acyls	544-64-9	HMDB0002000	-	-	-	-
Com_2412_neg	PI (3:0/16:4)	--	C28 H45 O13 P	5.347	619.26	1.58757e+07	1.22558e+07	9.22366e+06	6.16936e+06	1.14108e+07	1.15117e+07	7.22974e+06	6.44268e+06	8.41811e+06	8.14357e+06	1.26991e+07	1.19587e+07	1.03265e+07	8.51509e+06	9.11646e+06	--	--	--	-	-	-	-
Com_1525_neg	3-amino-1H-pyrazolo[4,3-c]pyridine-4,6-diol	--	C6 H6 N4 O2	5.2	165.04	8.27914e+06	7.35765e+06	2.17926e+07	1.86472e+07	7.24535e+06	8.09433e+06	2.70919e+07	3.07613e+07	2.88141e+07	2.98475e+07	2.5663e+07	2.55998e+07	1.81651e+07	1.69178e+07	2.18876e+07	--	--	--	-	-	-	-
Com_1598_neg	Prostaglandin F3α	--	C20 H32 O5	8.13	397.226	1.96695e+07	2.16615e+07	2.42184e+07	2.11343e+07	2.19804e+07	2.84635e+07	2.55936e+07	2.07537e+07	2.24062e+07	1.88552e+07	1.94261e+07	2.88312e+07	1.99845e+07	2.42396e+07	2.0173e+07	--	--	--	-	-	-	-
Com_2235_neg	Rubescensin A	--	C20 H28 O6	5.83	409.184	1.2966e+07	6.92124e+06	1.6067e+07	1.37249e+07	8.09066e+06	1.0075e+07	1.54514e+07	1.66277e+07	1.31059e+07	1.66111e+07	1.12423e+07	9.52324e+06	1.38918e+07	1.18509e+07	1.35865e+07	--	--	--	-	-	-	-
Com_2719_neg	MGDG (16:1/18:3)	--	C43 H74 O10	8.396	809.542	4.69403e+06	4.09709e+06	2.66579e+06	3.43597e+06	2.02088e+06	1.28662e+06	1.10618e+07	1.50341e+07	6.98747e+06	7.13494e+06	4.30541e+06	3.58407e+06	8.97855e+06	6.34536e+06	6.39468e+06	--	--	--	-	-	-	-
Com_951_neg	--	Acetaminophen	C8 H9 N O2	5.137	347.125	4.99079e+07	2.87671e+07	2.20653e+07	2.06311e+07	5.66799e+07	5.13868e+07	3.03987e+07	3.35621e+07	2.59268e+07	3.28443e+07	5.37205e+07	3.53326e+07	3.82979e+07	3.43967e+07	4.02584e+07	Phenols	103-90-2	HMDB0001859	-	-	-	-
Com_1914_neg	--	Caffeic aldehyde	C9 H8 O3	5.479	163.04	4.97871e+06	5.87632e+06	1.94888e+07	1.79417e+07	4.12396e+06	3.62382e+06	1.53651e+07	1.44837e+07	1.64587e+07	1.37025e+07	1.18528e+07	1.28362e+07	1.32785e+07	1.08011e+07	1.04101e+07	Cinnamaldehydes	-	HMDB0141767	C10945	ko01110//Biosynthesis of secondary metabolites;ko00940//Phenylpropanoid biosynthesis	Biosynthesis of other secondary metabolites;Global and overview maps	Metabolism
Com_26_neg	2,3-dinor Prostaglandin E1	--	C18 H30 O5	6.317	261.186	3.98719e+09	3.55818e+09	3.8693e+09	4.24052e+09	2.90475e+09	3.09188e+09	3.06784e+09	2.97429e+09	3.90821e+09	4.13687e+09	3.01709e+09	3.0524e+09	3.53371e+09	3.38401e+09	3.58415e+09	--	--	--	-	-	-	-
Com_964_neg	cis-2-Decenoic acid	--	C10 H18 O2	6.07	169.123	2.8084e+07	5.06706e+07	4.50146e+07	4.2307e+07	4.14547e+07	4.22537e+07	4.25041e+07	4.48531e+07	4.92248e+07	5.17147e+07	2.7694e+07	2.462e+07	4.67021e+07	4.33716e+07	4.76035e+07	Fatty Acyls	-	HMDB0010726	-	-	-	-
Com_13_neg	--	9-HpOTrE	C18 H30 O4	6.353	309.207	7.79942e+09	7.68364e+09	8.97504e+09	6.67908e+09	1.0611e+10	8.73193e+09	7.93189e+09	7.97073e+09	7.76121e+09	8.75255e+09	7.23869e+09	8.92095e+09	7.32991e+09	1.02963e+10	8.80616e+09	--	--	--	-	-	-	-
Com_248_neg	4-(2-thienyl)benzoic acid	--	C11 H8 O2 S	1.963	203.019	2.27665e+08	2.53773e+08	2.12892e+08	1.72868e+08	2.55021e+08	2.13342e+08	2.54376e+08	3.13132e+08	2.09717e+08	9.57511e+07	2.48031e+08	1.76206e+08	2.10271e+08	1.31786e+08	2.39147e+08	--	--	--	-	-	-	-
Com_4083_neg	Rehmannioside A	--	C21 H32 O15	5.003	569.172	7.21028e+06	5.57826e+06	3.9918e+06	3.20128e+06	6.52582e+06	5.05698e+06	6.40165e+06	6.55853e+06	6.32982e+06	7.3782e+06	5.24234e+06	4.38348e+06	5.68909e+06	6.34064e+06	5.27552e+06	--	--	--	-	-	-	-
Com_1970_neg	5-O-Methylvisammioside	--	C22 H28 O10	5.399	497.167	1.08884e+07	1.14101e+07	1.66547e+07	1.65719e+07	9.36328e+06	9.8416e+06	8.9335e+06	8.70622e+06	1.22088e+07	1.12912e+07	1.58627e+07	2.18465e+07	9.25504e+06	9.65242e+06	9.3611e+06	--	--	--	-	-	-	-
Com_455_neg	12-oxo Leukotriene B4	--	C20 H30 O4	7.275	333.205	1.15629e+08	9.88056e+07	1.00339e+08	1.04098e+08	8.68264e+07	9.90761e+07	1.48236e+08	1.47301e+08	9.87511e+07	1.19161e+08	8.36083e+07	1.04571e+08	1.06016e+08	9.33217e+07	1.27311e+08	--	--	--	-	-	-	-
Com_1550_neg	--	Ophiopogonanone E	C19 H20 O7	5.578	359.115	2.15985e+07	2.0356e+07	2.57473e+07	2.07698e+07	1.90434e+07	1.8843e+07	1.97772e+07	2.09224e+07	2.54672e+07	2.41863e+07	1.73347e+07	1.71034e+07	1.89643e+07	2.07878e+07	2.11547e+07	--	--	--	-	-	-	-
Com_2579_neg	PA (5:0/20:2)	--	C28 H51 O8 P	6.098	583.276	1.44099e+07	1.3923e+07	5.70295e+06	3.93997e+06	4.52575e+06	3.79748e+06	3.18324e+06	2.96952e+06	4.42447e+06	4.16014e+06	6.7466e+06	6.15512e+06	6.28096e+06	6.45873e+06	6.14591e+06	--	--	--	-	-	-	-
Com_5797_neg	--	Isoliquiritin apioside	C26 H30 O13	5.645	549.162	1.67027e+06	2.04598e+06	1.76309e+06	2.02759e+06	2.29223e+06	3.0939e+06	3.93253e+06	4.34636e+06	3.18905e+06	2.24456e+06	3.25852e+06	3.33184e+06	2.50582e+06	3.01282e+06	3.11287e+06	Flavonoids	120926-46-7	HMDB0040728	-	-	-	-
Com_8876_neg	DGDG (16:0/26:4)	--	C57 H100 O15	10.523	1069.7	151583	124348	406301	409332	955328	1.52934e+06	964254	406209	125957	259013	327193	298247	544898	581619	881141	--	--	--	-	-	-	-
Com_1569_neg	19(R)-Hydroxy prostaglandin F1α	--	C20 H36 O6	6.128	371.244	2.36089e+07	2.44078e+07	2.45604e+07	2.54934e+07	1.87595e+07	1.9491e+07	1.31822e+07	1.51429e+07	1.79177e+07	2.01076e+07	1.93907e+07	1.54939e+07	2.28212e+07	2.1827e+07	1.95447e+07	--	--	--	-	-	-	-
Com_1816_neg	N1-(3-phenyl-1H-pyrazol-5-yl)ethanimidamide hydroiodide	--	C11 H12 N4	7.083	199.097	1.56236e+07	2.20774e+07	1.524e+07	1.25545e+07	1.77625e+07	1.75427e+07	1.80629e+07	1.88574e+07	1.45547e+07	1.34903e+07	5.50613e+06	1.74275e+07	1.84401e+07	1.8851e+07	1.83541e+07	--	--	--	-	-	-	-
Com_3563_neg	DGDG (18:3/18:5)	--	C51 H80 O15	8.296	991.578	653582	424833	872197	1.35993e+06	3.00733e+06	1.94532e+06	4.45931e+06	5.59338e+06	7.34941e+06	9.03995e+06	4.45826e+06	4.22889e+06	3.50451e+06	3.57728e+06	3.43855e+06	--	--	--	-	-	-	-
Com_8916_neg	LPC 20:2	--	C28 H54 N O7 P	9.637	592.362	764993	624761	658505	755941	481540	357899	1.48943e+06	1.0323e+06	1.12711e+06	1.23781e+06	785462	964161	677917	743419	940273	--	--	--	-	-	-	-
Com_4524_neg	Eupafolin	--	C16 H12 O7	5.457	333.062	537484	509538	440318	473709	1.02134e+06	1.06368e+06	667352	699204	644405	797929	6.04038e+06	6.44768e+06	2.53995e+06	3.24722e+06	3.12849e+06	--	--	--	-	-	-	-
Com_7163_neg	Ingenol-5,20-acetonide	--	C23 H32 O5	7.016	387.215	1.37635e+06	1.49699e+06	2.31815e+06	1.8948e+06	991274	657560	962121	907844	992681	879806	1.00623e+06	1.29576e+06	1.20087e+06	1.20499e+06	1.119e+06	--	--	--	-	-	-	-
Com_1756_neg	Sibiricose A5	--	C22 H30 O14	5.423	471.151	2.37217e+07	2.03245e+07	2.00891e+07	1.8664e+07	1.28006e+07	1.41039e+07	1.7152e+07	1.59313e+07	2.04604e+07	1.35716e+07	2.45988e+07	2.50094e+07	1.78151e+07	1.7363e+07	2.13119e+07	--	--	--	-	-	-	-
Com_2769_neg	Fludrocortisone acetate	--	C23 H31 F O6	5.581	421.196	9.79384e+06	1.01078e+07	1.11311e+07	1.2129e+07	6.16012e+06	6.74825e+06	9.69721e+06	9.62044e+06	1.07834e+07	9.68851e+06	8.7903e+06	1.08518e+07	7.85004e+06	9.40186e+06	9.6093e+06	Steroids and steroid derivatives	53-06-5	HMDB0002802	C00762	ko01100//Metabolic pathways	Global and overview maps	Metabolism
Com_921_neg	2,3,6-Trimethylphenol	--	C9 H12 O	6.319	135.081	2.92198e+07	4.2184e+07	4.44051e+07	4.63529e+07	1.10257e+07	1.08834e+07	2.94563e+07	2.76164e+07	4.91976e+07	5.71031e+07	2.86724e+07	2.55241e+07	2.9752e+07	3.15255e+07	3.35604e+07	Benzene and substituted derivatives	2416-94-6	HMDB0029667	-	-	-	-
Com_32_neg	LPG 16:1	--	C22 H43 O9 P	9.328	481.257	3.41453e+09	2.70642e+09	1.77322e+09	2.12368e+09	2.186e+09	2.41085e+09	2.86608e+09	1.86395e+09	3.04701e+09	3.17703e+09	4.13921e+09	3.5039e+09	2.18209e+09	3.37533e+09	4.66592e+09	--	--	--	-	-	-	-
Com_961_neg	Ecliptasaponin A	--	C36 H58 O9	6.35	633.4	3.78929e+07	4.86807e+07	4.42478e+07	4.8055e+07	1.92638e+07	2.13614e+07	2.64322e+07	2.23741e+07	3.63267e+07	3.34205e+07	2.57981e+07	2.5543e+07	3.77999e+07	3.59429e+07	3.40295e+07	--	--	--	-	-	-	-
Com_752_neg	--	Caffeic acid O-glucoside	C15 H18 O9	5.023	341.088	2.43045e+07	2.23777e+07	2.58731e+07	6.52039e+07	3.89125e+07	4.09385e+07	1.09471e+07	2.44385e+07	3.47208e+07	3.14141e+07	2.32291e+07	1.46445e+07	2.14812e+07	2.69927e+07	3.10007e+07	--	--	--	-	-	-	-
Com_5122_neg	--	Neonuezhenide	C31 H42 O18	5.201	701.228	3.66206e+06	4.29344e+06	2.96622e+06	2.94568e+06	4.155e+06	4.0321e+06	3.53799e+06	2.98202e+06	2.78564e+06	3.67778e+06	4.90922e+06	4.9262e+06	4.90549e+06	3.17696e+06	5.37914e+06	--	--	--	-	-	-	-
Com_9079_neg	--	Pectolinarin	C29 H34 O15	10.647	621.186	785548	720483	849399	781765	753137	563632	1.04485e+06	1.41304e+06	963812	890782	1.36252e+06	944948	771892	942284	1.03558e+06	--	--	--	-	-	-	-
Com_4747_neg	--	(-)-N-[3',4'-Dihydroxy-(E)-cinnamoyl]-L-glutamic acid	C14 H15 N O7	5.223	308.078	2.9449e+06	2.52269e+06	2.13692e+06	2.12658e+06	5.98204e+06	6.22077e+06	4.85596e+06	4.88693e+06	5.03572e+06	4.26191e+06	4.49503e+06	174152	3.4788e+06	3.39872e+06	4.44877e+06	--	--	--	-	-	-	-
Com_5701_neg	Gossypol	--	C30 H30 O8	6.775	517.183	1.6158e+06	976629	1.04529e+06	1.15242e+06	964620	1.13788e+06	4.40833e+06	3.66031e+06	3.87404e+06	3.08234e+06	2.68235e+06	2.49703e+06	2.73852e+06	3.04865e+06	2.01929e+06	Prenol lipids	90141-22-3	HMDB0040723	C07667	ko01110//Biosynthesis of secondary metabolites;ko00909//Sesquiterpenoid and triterpenoid biosynthesis	Global and overview maps;Metabolism of terpenoids and polyketides	Metabolism
Com_1531_neg	--	Sibirioside A	C21 H28 O12	5.571	471.151	2.60117e+07	2.78128e+07	6.94005e+06	7.7559e+06	5.24362e+06	4.08045e+06	6.16269e+06	7.2263e+06	6.98598e+06	6.27488e+06	9.4981e+06	1.39835e+07	1.06186e+07	1.19548e+07	1.15086e+07	--	--	--	-	-	-	-
Com_3737_neg	--	Levulinic acid	C5 H8 O3	5.357	115.04	3.71624e+06	3.58634e+06	4.21405e+06	3.95845e+06	6.19974e+06	6.56004e+06	7.58706e+06	9.03594e+06	3.50794e+06	3.33293e+06	2.56497e+06	2.42104e+06	4.4874e+06	4.34023e+06	5.19887e+06	Keto acids and derivatives	123-76-2	HMDB0000720	-	-	-	-
Com_3646_neg	Stevioside	--	C38 H60 O18	5.595	803.372	4.17289e+06	5.09088e+06	2.41295e+06	3.6331e+06	8.98489e+06	8.77985e+06	5.31526e+06	4.17579e+06	3.7733e+06	4.878e+06	6.93325e+06	7.58933e+06	5.50353e+06	5.45836e+06	6.80435e+06	Prenol lipids	57817-89-7	HMDB0034945	C09189	ko01110//Biosynthesis of secondary metabolites	Global and overview maps	Metabolism
Com_403_neg	Zeranol	--	C18 H26 O5	6.74	321.171	9.8399e+07	1.08337e+08	1.14835e+08	1.26049e+08	6.47573e+07	6.60747e+07	1.66291e+08	8.52096e+07	1.1791e+08	1.12076e+08	8.95677e+07	8.26213e+07	1.07114e+08	9.56725e+07	9.81332e+07	Macrolides and analogues	26538-44-3	HMDB0032702	-	-	-	-
Com_3620_neg	--	Complanatuside	C28 H32 O16	5.328	623.161	2.58739e+06	2.36642e+06	4.7718e+06	3.51368e+06	9.10234e+06	7.052e+06	6.27049e+06	7.80326e+06	4.9712e+06	4.87402e+06	8.26803e+06	7.85535e+06	4.80313e+06	5.1321e+06	6.17833e+06	--	--	--	-	-	-	-
Com_5093_neg	LPI 20:1	--	C29 H55 O12 P	8.002	625.343	1.5414e+06	1.25844e+06	1.7124e+06	1.74523e+06	2.85734e+06	3.2593e+06	5.18872e+06	5.51798e+06	3.53345e+06	3.51414e+06	2.0579e+06	2.40936e+06	2.80422e+06	2.53058e+06	2.74007e+06	--	--	--	-	-	-	-
Com_8818_neg	PA (20:1/22:6)	--	C45 H75 O8 P	10.025	773.519	759580	620773	1.20975e+06	1.30966e+06	329321	378796	595285	336366	440375	568384	284613	234660	673024	657760	724439	--	--	--	-	-	-	-
Com_273_neg	LPI 16:0	--	C25 H49 O12 P	9.728	571.288	2.30612e+08	1.63587e+08	1.8133e+08	1.32547e+08	1.62566e+08	1.89839e+08	1.52221e+08	1.67262e+08	1.07942e+08	2.65841e+08	1.15879e+08	1.00798e+08	1.93579e+08	1.37517e+08	1.3085e+08	--	--	--	-	-	-	-
Com_2784_neg	Forsythin	--	C27 H34 O11	5.835	579.208	3.46008e+06	3.09967e+06	2.62554e+06	2.42482e+06	6.60523e+06	6.49241e+06	5.26758e+06	5.78917e+06	4.13412e+06	2.55911e+06	1.13761e+07	1.38899e+07	4.52376e+06	5.03953e+06	6.06251e+06	--	--	--	-	-	-	-
Com_356_neg	LPG 18:3	--	C24 H43 O9 P	7.089	505.257	8.05707e+07	8.44058e+07	6.90528e+07	9.50102e+07	9.66642e+07	1.06937e+08	1.18396e+08	1.01268e+08	1.84436e+08	9.08184e+07	9.76417e+07	1.91464e+08	6.78805e+07	9.79949e+07	9.9077e+07	--	--	--	-	-	-	-
Com_9676_neg	Glabrone	--	C20 H16 O5	4.918	335.089	424149	361960	860078	696970	320597	355151	649326	411077	700636	661203	364607	283466	353783	428522	352710	Isoflavonoids	60008-02-8	HMDB0029533	-	-	-	-
Com_2334_neg	2-C-methyl D-erythritol 4-phosphate	--	C5 H13 O7 P	1.238	215.032	8.93108e+06	6.3001e+06	1.01061e+07	1.50636e+07	7.32373e+06	7.98969e+06	1.53204e+07	1.4212e+07	9.82813e+06	8.3092e+06	7.10646e+06	7.67184e+06	1.67235e+07	1.02918e+07	9.51359e+06	--	--	--	-	-	-	-
Com_3191_neg	Bengenin	--	C14 H16 O9	5.071	327.072	2.63698e+06	1.82864e+06	2.80187e+06	2.68528e+06	4.41836e+06	5.49548e+06	7.53834e+06	7.92599e+06	5.66414e+06	6.57697e+06	1.01365e+07	1.11057e+07	5.82656e+06	4.01927e+06	5.87314e+06	--	--	--	-	-	-	-
Com_1928_neg	--	Demethylzeylasteral	C29 H36 O6	9.114	479.243	1.05765e+07	9.79877e+06	1.64592e+07	1.28179e+07	5.82171e+06	6.70634e+06	2.30707e+07	1.95887e+07	1.5658e+07	1.40821e+07	1.66053e+07	8.52726e+06	1.58077e+07	1.54859e+07	1.4694e+07	--	--	--	-	-	-	-
Com_2821_neg	PG (2:0/20:1)	--	C28 H53 O10 P	5.752	579.337	1.04296e+07	5.11826e+06	7.36523e+06	7.83529e+06	1.15215e+07	1.10004e+07	6.23932e+06	7.09516e+06	8.51722e+06	9.9801e+06	1.33864e+07	1.35834e+07	8.3714e+06	9.75874e+06	8.61588e+06	--	--	--	-	-	-	-
Com_2615_neg	PS (2:0/20:2)	--	C28 H50 N O10 P	5.49	590.318	4.14354e+06	3.89585e+06	5.03611e+06	5.70049e+06	1.41953e+07	1.56407e+07	6.68037e+06	6.36218e+06	7.04506e+06	6.99866e+06	9.50823e+06	1.0391e+07	7.52566e+06	7.99424e+06	8.52763e+06	--	--	--	-	-	-	-
Com_3309_neg	FAHFA (18:1/20:3)	--	C38 H66 O4	10.69	585.486	8.66671e+06	7.61758e+06	5.89398e+06	6.48301e+06	1.0469e+07	1.08407e+07	5.1662e+06	5.90835e+06	4.30716e+06	4.69072e+06	3.36437e+06	3.06814e+06	7.39285e+06	6.34141e+06	7.31683e+06	--	--	--	-	-	-	-
Com_2225_neg	DGDG (2:0/3:0)	--	C20 H34 O15	5.817	573.198	3.30423e+06	2.87439e+06	1.81974e+06	1.89669e+06	6.74908e+06	5.00049e+06	6.57866e+06	9.40476e+06	1.31715e+06	2.30388e+06	1.80649e+07	1.87376e+07	4.91802e+06	5.38188e+06	6.12785e+06	--	--	--	-	-	-	-
Com_5897_neg	Argininosuccinic acid	--	C10 H18 N4 O6	5.175	289.119	753228	1.25376e+06	785913	997931	3.99276e+06	4.19677e+06	2.27826e+06	1.85289e+06	2.31369e+06	1.75363e+06	1.36396e+06	1.07681e+06	1.67616e+06	1.978e+06	2.39739e+06	Carboxylic acids and derivatives	2387-71-5	HMDB0000052	C03406	ko01100//Metabolic pathways;ko01110//Biosynthesis of secondary metabolites;ko01130//Biosynthesis of antibiotics;ko01230//Biosynthesis of amino acids;ko00250//Alanine, aspartate and glutamate metabolism;ko00220//Arginine biosynthesis	Amino acid metabolism;Global and overview maps	Metabolism
Com_1959_neg	--	Glutaric Acid	C5 H8 O4	4.943	131.035	1.50232e+07	1.33479e+07	1.89833e+07	1.84132e+07	5.75143e+06	6.15368e+06	1.92239e+07	1.97323e+07	1.58481e+07	1.52116e+07	5.11175e+06	5.72373e+06	1.16338e+07	1.26013e+07	1.42006e+07	Carboxylic acids and derivatives	110-94-1	HMDB0000661	C00489	ko01120//Microbial metabolism in diverse environments;ko00310//Lysine degradation;ko00071//Fatty acid degradation	Amino acid metabolism;Global and overview maps;Lipid metabolism	Metabolism
Com_971_neg	--	Tuberonic acid hexoside	C18 H28 O9	5.772	387.166	2.94148e+07	3.16206e+07	4.39819e+07	4.6923e+07	1.5883e+07	1.56475e+07	2.20876e+07	2.37477e+07	1.8806e+07	1.73451e+07	2.2221e+07	2.25812e+07	2.39206e+07	2.86711e+07	2.29536e+07	--	--	--	-	-	-	-
Com_1391_neg	PS (2:0/22:2)	--	C30 H54 N O10 P	5.705	618.349	1.20653e+07	1.8894e+07	1.58902e+07	1.80767e+07	3.33282e+07	3.60122e+07	2.10459e+07	1.33552e+07	1.82204e+07	1.70306e+07	3.17124e+07	2.91477e+07	1.9959e+07	2.06909e+07	2.05999e+07	--	--	--	-	-	-	-
Com_4050_neg	--	Palmaturbine	C20 H20 N O4	5.945	337.131	649995	617145	590572	749129	697070	647481	506684	517188	802497	563112	7.89824e+06	651723	795509	710686	659493	--	--	--	-	-	-	-
Com_1609_neg	Thioctic acid	--	C8 H14 O2 S2	2.485	205.035	1.73656e+07	1.70811e+07	1.73764e+07	1.66871e+07	2.87417e+07	2.40478e+07	1.98959e+07	1.51739e+07	1.2966e+07	1.34226e+07	2.29439e+07	1.9411e+07	1.83568e+07	1.8291e+07	2.14485e+07	Dithiolanes	1077-27-6	HMDB0014312	-	-	-	-
Com_4037_neg	LPG 17:0	--	C23 H47 O9 P	5.667	451.291	5.10037e+06	3.69198e+06	6.19038e+06	6.7283e+06	5.15153e+06	4.85966e+06	3.04975e+06	3.97267e+06	5.79498e+06	5.99952e+06	2.30809e+06	3.93429e+06	3.9855e+06	4.79015e+06	4.26039e+06	--	--	--	-	-	-	-
Com_6217_neg	Gambogenic acid	--	C38 H46 O8	8.903	629.315	234967	286937	201956	331106	232834	259347	3.75162e+06	3.55863e+06	864273	2.38152e+06	916555	824173	1.17863e+06	1.1068e+06	803355	--	--	--	-	-	-	-
Com_8845_neg	LPI 3:0	--	C12 H23 O12 P	5.545	389.085	1.17833e+06	1.03079e+06	562885	722929	1.43349e+06	1.23637e+06	709026	1.22914e+06	1.4837e+06	1.4069e+06	1.17615e+06	1.19089e+06	721863	1.15114e+06	1.18069e+06	--	--	--	-	-	-	-
Com_7963_neg	Diosmin	--	C28 H32 O15	7.094	607.162	351628	360666	328798	322571	1.72763e+06	2.16946e+06	488953	379621	261649	269095	236112	260265	630914	296616	468388	Flavonoids	520-27-4	HMDB0029548	-	-	-	-
Com_7594_neg	--	Neohesperidin dihydrochalcone	C28 H36 O15	5.54	611.199	1.68601e+06	1.46677e+06	1.50775e+06	1.2366e+06	2.36812e+06	2.24914e+06	2.27916e+06	1.98582e+06	1.60079e+06	1.56032e+06	1.56911e+06	1.75324e+06	1.54208e+06	1.66922e+06	2.18412e+06	Flavonoids	20702-77-6	HMDB0030542	-	-	-	-
Com_5265_neg	DGDG (2:0/22:6)	--	C39 H60 O15	5.614	827.403	822216	430135	2.53826e+06	1.56954e+06	3.16084e+06	3.63843e+06	3.0048e+06	2.58748e+06	2.83277e+06	2.93469e+06	4.28295e+06	4.97221e+06	2.31773e+06	2.55951e+06	2.39673e+06	--	--	--	-	-	-	-
Com_193_neg	PI (2:0/20:4)	--	C31 H51 O13 P	5.907	661.286	1.96928e+08	1.65137e+08	3.13134e+08	2.61709e+08	2.50477e+08	2.50727e+08	3.43039e+08	3.07996e+08	3.91298e+08	2.91218e+08	3.40759e+08	3.80561e+08	3.21018e+08	2.28099e+08	2.76623e+08	--	--	--	-	-	-	-
Com_5516_neg	--	Kinetin 9-riboside	C15 H17 N5 O5	4.997	346.114	2.26852e+06	2.57895e+06	2.97648e+06	2.32952e+06	3.7979e+06	4.72722e+06	2.70843e+06	2.51088e+06	2.62179e+06	2.68155e+06	3.29189e+06	3.26992e+06	1.90619e+06	2.66767e+06	3.28582e+06	--	--	--	-	-	-	-
Com_4906_neg	Gly-Ile	--	C8 H16 N2 O3	5.013	187.109	4.923e+06	4.81509e+06	4.87417e+06	4.90783e+06	1.96495e+06	1.72927e+06	3.59793e+06	3.07502e+06	2.86925e+06	2.41247e+06	1.86149e+06	2.54651e+06	2.90625e+06	2.94185e+06	3.85309e+06	Carboxylic acids and derivatives	-	HMDB0028844	-	-	-	-
Com_4058_neg	Verbenalin	--	C17 H24 O10	5.172	433.135	4.73588e+06	3.08368e+06	3.0106e+06	2.13828e+06	5.8671e+06	7.85746e+06	6.95131e+06	6.83375e+06	5.80175e+06	5.27215e+06	5.51004e+06	3.37382e+06	4.42888e+06	5.65095e+06	7.94368e+06	--	--	--	-	-	-	-
Com_3920_neg	Camptothecine	--	C20 H16 N2 O4	5.214	347.098	5.91861e+06	4.66158e+06	3.36386e+06	3.31238e+06	7.68861e+06	7.4013e+06	5.08118e+06	5.50554e+06	4.99719e+06	4.69801e+06	7.89717e+06	8.10295e+06	4.91898e+06	5.62839e+06	6.18358e+06	--	--	--	-	-	-	-
Com_730_neg	Salvinorin B	--	C21 H26 O7	7.409	389.164	6.42524e+07	5.04665e+07	3.31364e+07	4.02303e+07	5.61424e+06	9.99261e+06	2.18863e+07	2.64181e+07	6.47935e+07	7.65561e+07	1.68913e+07	1.69403e+07	3.86636e+07	3.10154e+07	5.63597e+07	--	--	--	-	-	-	-
Com_6417_neg	--	Lycoperodine	C12 H12 N2 O2	5.355	215.083	1.24234e+06	2.42833e+06	883506	656744	3.45127e+06	3.35937e+06	2.55667e+06	2.4733e+06	1.7679e+06	2.09964e+06	2.44951e+06	1.84485e+06	1.87429e+06	1.90893e+06	2.50158e+06	--	--	--	-	-	-	-
Com_7167_neg	LPS 20:4	--	C26 H44 N O9 P	11.412	544.265	2.42903e+06	2.35247e+06	1.21764e+06	1.38206e+06	978386	1.22319e+06	1.517e+06	1.67149e+06	2.24806e+06	2.62497e+06	1.60931e+06	1.36898e+06	1.18814e+06	1.76287e+06	1.87662e+06	--	--	--	-	-	-	-
Com_2697_neg	3,4-Dihydroxyphenylpropionic acid	--	C9 H10 O4	5.11	135.045	4.95214e+06	3.63952e+06	5.2522e+06	5.37933e+06	7.52808e+06	8.06847e+06	9.85352e+06	1.1667e+07	1.01519e+07	1.41977e+07	8.686e+06	8.72981e+06	6.75441e+06	7.36344e+06	7.68508e+06	Phenylpropanoic acids	1078-61-1	HMDB0000423	C10447	ko00350//Tyrosine metabolism	Amino acid metabolism	Metabolism
Com_249_neg	PA (2:0/22:3)	--	C27 H47 O8 P	6.808	529.302	5.71995e+07	5.37287e+07	8.40868e+07	8.44019e+07	5.72173e+07	6.60922e+07	3.0379e+08	2.49156e+08	1.92971e+08	2.00151e+08	1.39386e+08	1.16385e+08	1.16204e+08	1.29847e+08	1.35253e+08	--	--	--	-	-	-	-
Com_1413_neg	trans-Cinnamic acid	--	C9 H8 O2	5.476	147.045	4.24985e+06	3.79189e+06	1.89212e+06	2.01623e+06	3.42542e+07	3.43934e+07	1.20947e+07	1.25449e+07	3.45089e+06	2.85762e+06	2.26961e+06	2.4167e+06	1.01627e+07	9.81745e+06	1.10318e+07	Cinnamic acids and derivatives	140-10-3	HMDB0000930	C00423	ko01100//Metabolic pathways;ko01110//Biosynthesis of secondary metabolites;ko01120//Microbial metabolism in diverse environments;ko00940//Phenylpropanoid biosynthesis;ko00360//Phenylalanine metabolism;ko01220//Degradation of aromatic compounds;ko00130//Ubiquinone and other terpenoid-quinone biosynthesis	Amino acid metabolism;Biosynthesis of other secondary metabolites;Global and overview maps;Metabolism of cofactors and vitamins	Metabolism
Com_4748_neg	4-tert-butylphenol	--	C10 H14 O	6.033	149.097	4.51997e+06	5.48507e+06	1.35372e+06	1.30638e+06	3.15885e+06	3.34557e+06	3.66604e+06	3.2477e+06	2.07889e+06	1.20189e+06	2.4307e+06	2.56654e+06	2.62359e+06	2.32618e+06	3.49608e+06	Benzene and substituted derivatives	98-54-4	HMDB0032063	-	-	-	-
Com_285_neg	LPC 18:2	--	C26 H50 N O7 P	9.004	564.33	1.45761e+08	1.38938e+08	1.87057e+08	1.81297e+08	2.33991e+08	2.45785e+08	1.89925e+08	2.09385e+08	2.54589e+08	2.48211e+08	1.46747e+08	1.48811e+08	1.78919e+08	1.98328e+08	2.12553e+08	--	--	--	-	-	-	-
Com_3905_neg	Isofraxidin	--	C11 H10 O5	5.339	221.045	5.57791e+06	6.09624e+06	6.62318e+06	6.35429e+06	7.36615e+06	6.88343e+06	8.3429e+06	7.12259e+06	7.75719e+06	7.34431e+06	4.87083e+06	4.80378e+06	5.60769e+06	5.89657e+06	6.5281e+06	--	--	--	-	-	-	-
Com_1682_neg	1-[6-(benzyloxy)-3-(tert-butyl)-2-hydroxyphenyl]ethan-1-one	--	C19 H22 O3	6.345	297.152	1.27309e+07	1.2779e+07	9.0024e+06	9.37646e+06	9.37014e+06	1.0961e+07	1.08667e+07	1.14935e+07	2.66681e+07	1.44908e+07	1.51723e+07	1.60373e+07	1.27051e+07	9.72508e+06	1.28463e+07	--	--	--	-	-	-	-
[truncated: 401 more rows]
