# Supplementary material for: Magnesium Nutrient Application Induces Metabolomics and Physiological Responses in Mulberry (Morus alba) Plants
Source: Int J Mol Sci. 2023 Jun 2;24(11):9650. doi: 10.3390/ijms24119650 (PMC10253527; doi:10.3390/ijms24119650)
Supplement: Supplementary file 1 [file ijms-24-09650-s001.zip › Supplementary Table S2.xlsx]

## Sheet: POS_CK-T1
Table S2: Differential metabolites in mulberry leaves response to various Mg applications and deficiency
index	CK-1	CK-2	T1-1	T1-2	control_mean	case_mean	log2_FC(case_mean/control_mean)	Pvalue	fdr	vip	MS2_name	MS1_name	formula	rtmin	mz	Class	CAS	HMDB	C_ID	Pathway	KEGG_B_class	KEGG_A_class
Com_18_pos	5.44946e+09	5.46362e+09	7.26861e+09	6.93353e+09	5.45654e+09	7.10107e+09	0.38005	0.010238	0.0905534	7.65434	伪-Eleostearic acid	--	C18 H30 O2	7.939	279.231	--	--	--	-	-	-	-
Com_39_pos	1.30556e+09	1.25406e+09	2.89999e+09	2.82626e+09	1.27981e+09	2.86313e+09	1.16166	0.000805624	0.0459533	7.51339	--	Pheophorbide A	C35 H36 N4 O5	10.514	593.275	--	--	--	C18021	ko01110//Biosynthesis of secondary metabolites;ko00860//Porphyrin and chlorophyll metabolism	Global and overview maps;Metabolism of cofactors and vitamins	Metabolism
Com_41_pos	3.3568e+09	3.15811e+09	2.36687e+09	2.239e+09	3.25745e+09	2.30294e+09	-0.50027	0.0149751	0.0993804	5.78451	Proline	--	C5 H9 N O2	1.367	116.07	Carboxylic acids and derivatives	344-25-2	HMDB0003411	-	-	-	-
Com_95_pos	2.39168e+08	2.11123e+08	9.98317e+08	8.4342e+08	2.25145e+08	9.20868e+08	2.03214	0.012558	0.0947263	4.97192	Oleoyl ethylamide	--	C20 H39 N O	10.768	310.31	--	--	--	-	-	-	-
Com_66_pos	1.03415e+09	9.60314e+08	1.72799e+09	1.59092e+09	9.97233e+08	1.65945e+09	0.734706	0.0135398	0.0960948	4.84206	Hexadecanamide	--	C16 H33 N O	9.701	256.263	Fatty Acyls	629-54-9	HMDB0012273	-	-	-	-
Com_33_pos	3.21655e+09	3.22613e+09	4.00084e+09	3.75457e+09	3.22134e+09	3.87771e+09	0.267542	0.0334864	0.147803	4.79889	5伪-Dihydrotestosterone	--	C19 H30 O2	8.256	291.231	--	--	--	-	-	-	-
Com_22_pos	2.02661e+09	1.79646e+09	1.38448e+09	1.32483e+09	1.91153e+09	1.35466e+09	-0.496803	0.0426729	0.168482	4.37007	Indole-3-acrylic acid	--	C11 H9 N O2	5.088	188.07	--	--	--	-	-	-	-
Com_31_pos	1.46973e+09	1.40417e+09	2.00263e+09	1.92893e+09	1.43695e+09	1.96578e+09	0.452098	0.00858617	0.08905	4.33003	PC (16:2e/2:0)	--	C26 H50 N O7 P	8.796	520.339	--	--	--	-	-	-	-
Com_23_pos	1.99566e+09	1.76032e+09	1.35965e+09	1.30148e+09	1.87799e+09	1.33057e+09	-0.497148	0.0456957	0.174798	4.32699	DL-Tryptophan	--	C11 H12 N2 O2	5.087	205.097	Indoles and derivatives	54-12-6	HMDB0030396	-	-	-	-
Com_77_pos	1.3094e+09	1.30087e+09	1.74334e+09	1.63457e+09	1.30513e+09	1.68895e+09	0.371931	0.0196075	0.11467	3.686	Bicyclo prostaglandin E2	--	C20 H30 O4	7.898	335.218	--	--	--	-	-	-	-
Com_253_pos	7.76056e+07	6.82286e+07	4.32842e+08	3.52909e+08	7.29171e+07	3.92875e+08	2.42974	0.0154522	0.0995866	3.36948	Stearamide	--	C18 H37 N O	10.578	284.294	Fatty Acyls	124-26-5	HMDB0034146	-	-	-	-
Com_358_pos	3.30215e+08	3.06804e+08	4.14288e+07	3.95236e+07	3.18509e+08	4.04762e+07	-2.97619	0.00177952	0.0491534	3.14755	L-Pyroglutamic acid	--	C5 H7 N O3	2.179	130.05	Carboxylic acids and derivatives	98-79-3	HMDB0000267	C01879	ko01100//Metabolic pathways;ko00480//Glutathione metabolism	Global and overview maps;Metabolism of other amino acids	Metabolism
Com_347_pos	3.37679e+08	2.91094e+08	7.92897e+07	7.62064e+07	3.14387e+08	7.7748e+07	-2.01566	0.00959135	0.0905534	2.89616	Isoliensinine	--	C37 H42 N2 O6	6.248	611.303	Isoquinolines and derivatives	6817-41-0	HMDB0033749	-	-	-	-
Com_152_pos	9.22424e+08	9.07217e+08	7.51414e+08	6.60163e+08	9.14821e+08	7.05789e+08	-0.374253	0.0456395	0.174798	2.64011	--	9-Hydroxy-(10E,12Z,15Z)-Octadecatrienoic Acid	C18 H30 O3	6.774	295.226	--	--	--	-	-	-	-
Com_229_pos	3.16282e+08	2.73385e+08	4.86682e+08	4.76485e+08	2.94834e+08	4.81583e+08	0.707885	0.013652	0.0961436	2.55775	Reserpine	--	C33 H40 N2 O9	9.911	609.269	Yohimbine alkaloids	50-55-5	HMDB0014351	-	-	-	-
Com_375_pos	9.17474e+07	8.782e+07	2.78796e+08	2.62317e+08	8.97837e+07	2.70557e+08	1.5914	0.00218843	0.0512564	2.5401	Acetophenone	--	C8 H8 O	2.457	121.065	Organooxygen compounds	98-86-2	HMDB0033910	C07113	ko01120//Microbial metabolism in diverse environments;ko01220//Degradation of aromatic compounds	Global and overview maps	Metabolism
Com_209_pos	5.97556e+08	5.89473e+08	3.94404e+08	4.42924e+08	5.93515e+08	4.18664e+08	-0.503489	0.0192167	0.11467	2.49017	(+/-)12(13)-DiHOME	--	C18 H34 O4	8.436	297.242	--	--	--	-	-	-	-
Com_708_pos	1.67873e+08	1.34384e+08	1.49399e+07	1.44475e+07	1.51129e+08	1.46937e+07	-3.36251	0.0147331	0.0986346	2.19524	--	5-oxoproline	C5 H7 N O3	1.697	130.05	Carboxylic acids and derivatives	-	HMDB0060262	C01879	ko01100//Metabolic pathways;ko00480//Glutathione metabolism	Global and overview maps;Metabolism of other amino acids	Metabolism
Com_394_pos	3.01348e+08	2.81646e+08	1.74754e+08	1.74492e+08	2.91497e+08	1.74623e+08	-0.739236	0.00703105	0.0833383	2.03777	Jasmone	--	C11 H16 O	6.239	165.127	Organooxygen compounds	488-10-8	HMDB0035601	-	-	-	-
Com_292_pos	2.28046e+08	2.2649e+08	3.4765e+08	3.3712e+08	2.27268e+08	3.42385e+08	0.591225	0.00213065	0.0512564	2.02729	PC (14:0e/2:0)	--	C24 H50 N O7 P	9.131	496.339	--	--	--	-	-	-	-
Com_193_pos	4.84511e+08	4.79617e+08	6.06881e+08	5.76897e+08	4.82064e+08	5.91889e+08	0.296103	0.0185979	0.11283	1.97167	1,2-dihydroxyheptadec-16-yn-4-yl acetate	--	C19 H34 O4	7.807	349.234	--	--	--	-	-	-	-
Com_252_pos	4.97182e+08	4.64261e+08	3.81169e+08	3.69424e+08	4.80721e+08	3.75296e+08	-0.35717	0.0263982	0.131605	1.91484	N-[2-chloro-6-(trifluoromethoxy)phenyl]-2,2-dimethylpropanamide	--	C12 H13 Cl F3 N O2	1.243	296.065	--	--	--	-	-	-	-
Com_1073_pos	1.0148e+08	1.00373e+08	605822	1.1614e+06	1.00927e+08	883609	-6.83568	3.82642e-05	0.039106	1.88851	Stercobilin	--	C33 H46 N4 O6	5.519	595.348	Tetrapyrroles and derivatives	-	HMDB0240259	C05793	ko00860//Porphyrin and chlorophyll metabolism	Metabolism of cofactors and vitamins	Metabolism
Com_196_pos	4.87337e+08	4.52679e+08	5.66492e+08	5.72559e+08	4.70008e+08	5.69526e+08	0.277077	0.029858	0.14193	1.84367	(12Z)-9,10,11-trihydroxyoctadec-12-enoic acid	--	C18 H34 O5	6.294	353.229	--	--	--	-	-	-	-
Com_872_pos	1.19187e+08	1.24715e+08	3.51709e+07	3.29411e+07	1.21951e+08	3.4056e+07	-1.84032	0.00114794	0.0472986	1.76614	Ajugol	--	C15 H24 O9	5.669	371.13	--	--	--	-	-	-	-
Com_1085_pos	8.79308e+07	9.95066e+07	1.59512e+07	9.91049e+06	9.37187e+07	1.29309e+07	-2.85752	0.00646723	0.0817348	1.68493	--	Ferruginol	C20 H30 O	6.195	287.236	--	--	--	C09092	ko01110//Biosynthesis of secondary metabolites;ko00904//Diterpenoid biosynthesis	Global and overview maps;Metabolism of terpenoids and polyketides	Metabolism
Com_232_pos	1.23923e+08	1.19846e+08	2.00442e+08	1.87079e+08	1.21885e+08	1.93761e+08	0.668761	0.00931403	0.0905534	1.59893	LPC 18:3	--	C26 H48 N O7 P	8.491	518.323	--	--	--	-	-	-	-
Com_524_pos	2.2121e+08	1.99478e+08	1.45229e+08	1.42966e+08	2.10344e+08	1.44097e+08	-0.545709	0.0261339	0.130926	1.52128	Allocryptopine	--	C21 H23 N O5	1.365	370.17	--	--	--	C02134	ko01110//Biosynthesis of secondary metabolites;ko00950//Isoquinoline alkaloid biosynthesis	Biosynthesis of other secondary metabolites;Global and overview maps	Metabolism
Com_883_pos	1.04331e+08	9.4967e+07	3.61087e+07	3.47324e+07	9.96488e+07	3.54205e+07	-1.49227	0.00538441	0.0753818	1.51074	Asparagine	--	C4 H8 N2 O3	1.308	133.061	Carboxylic acids and derivatives	70-47-3	HMDB0000168	-	-	-	-
Com_657_pos	1.69888e+08	1.67204e+08	1.07602e+08	1.05154e+08	1.68546e+08	1.06378e+08	-0.663951	0.000852466	0.0459533	1.48709	3-hydroxy-2-octylpentanedioic acid	--	C13 H24 O5	6.241	243.159	--	--	--	-	-	-	-
Com_659_pos	8.98933e+07	8.90772e+07	1.56185e+08	1.45196e+08	8.94852e+07	1.50691e+08	0.751868	0.00800597	0.08905	1.47704	SM (d14:0/12:1)	--	C31 H63 N2 O6 P	7.921	591.462	--	--	--	-	-	-	-
Com_586_pos	9.64717e+07	8.20359e+07	1.51697e+08	1.44614e+08	8.92538e+07	1.48156e+08	0.73113	0.0181265	0.111598	1.43522	Coumarin	--	C9 H6 O2	5.324	147.044	Coumarins and derivatives	91-64-5	HMDB0001218	C05851	ko01110//Biosynthesis of secondary metabolites;ko00940//Phenylpropanoid biosynthesis	Biosynthesis of other secondary metabolites;Global and overview maps	Metabolism
Com_1512_pos	3.20603e+06	3.25715e+06	6.19675e+07	5.94441e+07	3.23159e+06	6.07058e+07	4.23152	0.000481769	0.0459533	1.43224	PE (5:0/5:0)	--	C15 H30 N O8 P	6.063	384.183	--	--	--	-	-	-	-
Com_597_pos	9.82074e+07	9.9161e+07	1.50446e+08	1.61085e+08	9.86842e+07	1.55766e+08	0.658485	0.00864219	0.08905	1.41379	Psychosine	--	C24 H47 N O7	5.56	462.342	-	2238-90-6	HMDB0000648	C01747	ko00600//Sphingolipid metabolism	Lipid metabolism	Metabolism
Com_600_pos	1.80076e+08	1.7656e+08	1.266e+08	1.19753e+08	1.78318e+08	1.23176e+08	-0.533728	0.00483589	0.0731107	1.3952	伪-Propylaminopentiophenone	--	C14 H21 N O	5.342	220.169	--	--	--	-	-	-	-
Com_702_pos	1.29572e+08	1.53089e+08	8.70038e+07	7.99134e+07	1.4133e+08	8.34586e+07	-0.759939	0.0422066	0.168482	1.3938	Ecgonine methyl ester	--	C10 H17 N O3	2.364	200.128	Carboxylic acids and derivatives	-	HMDB0062751	C12448	ko01100//Metabolic pathways;ko01110//Biosynthesis of secondary metabolites;ko00960//Tropane, piperidine and pyridine alkaloid biosynthesis	Biosynthesis of other secondary metabolites;Global and overview maps	Metabolism
Com_706_pos	1.67992e+08	1.48238e+08	1.09915e+08	1.00551e+08	1.58115e+08	1.05233e+08	-0.587389	0.0401666	0.165904	1.34545	Uracil	--	C4 H4 N2 O2	2.208	113.034	Diazines	66-22-8	HMDB0000300	C00106	ko01100//Metabolic pathways;ko00410//beta-Alanine metabolism;ko00240//Pyrimidine metabolism;ko00770//Pantothenate and CoA biosynthesis	Global and overview maps;Metabolism of cofactors and vitamins;Metabolism of other amino acids;Nucleotide metabolism	Metabolism
Com_257_pos	2.20178e+08	2.15564e+08	2.7356e+08	2.62333e+08	2.17871e+08	2.67946e+08	0.298473	0.0143721	0.0975418	1.33183	LPE 18:2	--	C23 H44 N O7 P	8.813	478.292	--	--	--	-	-	-	-
Com_1581_pos	6.6914e+07	6.25061e+07	1.63743e+07	1.4086e+07	6.471e+07	1.52302e+07	-2.08706	0.00250929	0.0544439	1.32614	(9cis)-Retinal	--	C20 H28 O	5.884	285.221	--	--	--	-	-	-	-
Com_325_pos	3.43418e+08	3.42012e+08	2.9834e+08	2.9182e+08	3.42715e+08	2.9508e+08	-0.215904	0.00486451	0.0731107	1.29577	(11E,15Z)-9,10,13-trihydroxyoctadeca-11,15-dienoic acid	--	C18 H32 O5	6.766	329.232	--	--	--	-	-	-	-
Com_1080_pos	3.38428e+07	3.93818e+07	7.86436e+07	8.90725e+07	3.66123e+07	8.3858e+07	1.19562	0.0152607	0.0995866	1.28251	N-Acetyl-L-leucine	--	C8 H15 N O3	2.01	174.112	Carboxylic acids and derivatives	1188-21-2	HMDB0011756	-	-	-	-
Com_2001_pos	5.08671e+07	4.74515e+07	3.28736e+06	2.82951e+06	4.91593e+07	3.05844e+06	-4.0066	0.00139405	0.0474906	1.28166	--	Neotuberostemonine	C22 H33 N O4	8.328	376.246	--	--	--	-	-	-	-
Com_429_pos	1.97888e+08	1.99678e+08	1.59336e+08	1.45075e+08	1.98783e+08	1.52206e+08	-0.385172	0.0229891	0.123657	1.26319	Palmitic Acid	--	C16 H32 O2	6.229	274.274	Fatty Acyls	57-10-3	HMDB0000220	C00249	ko01100//Metabolic pathways;ko01040//Biosynthesis of unsaturated fatty acids;ko00073//Cutin, suberine and wax biosynthesis;ko00061//Fatty acid biosynthesis;ko00071//Fatty acid degradation;ko00062//Fatty acid elongation;ko01212//Fatty acid metabolism	Global and overview maps;Lipid metabolism	Metabolism
Com_977_pos	1.14104e+08	1.11021e+08	7.0191e+07	6.55087e+07	1.12563e+08	6.78499e+07	-0.730309	0.00390725	0.0680175	1.25762	Nor-9-carboxy-未9-THC	--	C21 H28 O4	7.928	345.203	--	--	--	-	-	-	-
Com_1340_pos	6.69298e+07	6.27701e+07	2.14829e+07	1.98238e+07	6.48499e+07	2.06534e+07	-1.65073	0.00255705	0.0544439	1.25366	Cortisone	--	C21 H28 O5	5.326	361.196	Steroids and steroid derivatives	50-04-4	HMDB0015459	C00762	ko01100//Metabolic pathways	Global and overview maps	Metabolism
Com_1737_pos	6.01667e+07	5.57877e+07	1.65136e+07	1.23476e+07	5.79772e+07	1.44306e+07	-2.00636	0.00478168	0.0731107	1.24135	2-{[(4,5-dimethoxy-2-nitrophenethyl)imino]methyl}phenol	--	C17 H18 N2 O5	5.669	331.138	--	--	--	-	-	-	-
Com_231_pos	7.71076e+07	7.69055e+07	3.51125e+07	3.23206e+07	7.70066e+07	3.37166e+07	-1.19152	0.00104361	0.0467986	1.23943	Indole-3-lactic acid	--	C11 H11 N O3	5.474	206.081	Indoles and derivatives	1821-52-9	HMDB0000671	-	-	-	-
Com_853_pos	7.25e+07	7.50762e+07	1.17505e+08	1.13408e+08	7.37881e+07	1.15456e+08	0.645886	0.00335588	0.0635132	1.22032	Hecogenin	--	C27 H42 O4	7.498	431.315	Flavonoids	115921-09-0	HMDB0038824	-	-	-	-
Com_545_pos	1.27133e+08	1.18771e+08	8.31939e+07	7.87214e+07	1.22952e+08	8.09577e+07	-0.602853	0.0125088	0.0947263	1.2155	Pyridoxine	--	C8 H11 N O3	4.937	170.081	Pyridines and derivatives	65-23-6	HMDB0000239	C00314	ko01100//Metabolic pathways;ko01120//Microbial metabolism in diverse environments;ko00750//Vitamin B6 metabolism	Global and overview maps;Metabolism of cofactors and vitamins	Metabolism
Com_1751_pos	5.9745e+07	4.88756e+07	1.64246e+07	1.61853e+07	5.43103e+07	1.63049e+07	-1.73592	0.0198513	0.11467	1.15613	--	7-O-Ethylmorroniside	C19 H30 O11	5.439	435.184	--	--	--	-	-	-	-
Com_1343_pos	7.02232e+07	7.61843e+07	3.37463e+07	3.75013e+07	7.32038e+07	3.56238e+07	-1.03908	0.00867232	0.08905	1.1526	DGTS (2:0/3:0)	--	C15 H27 N O7	5.337	334.185	--	--	--	-	-	-	-
Com_1131_pos	3.16549e+07	2.93751e+07	6.87366e+07	6.61158e+07	3.0515e+07	6.74262e+07	1.14379	0.00220673	0.0512564	1.14663	4-Hydroxybenzaldehyde	--	C7 H6 O2	4.75	123.044	Organooxygen compounds	123-08-0	HMDB0011718	C00633	ko01100//Metabolic pathways;ko01120//Microbial metabolism in diverse environments	Global and overview maps	Metabolism
Com_1120_pos	9.90852e+07	9.60428e+07	6.29632e+07	5.7797e+07	9.7564e+07	6.03801e+07	-0.692276	0.00643676	0.0817348	1.14464	DGTS (2:0/10:0)	--	C22 H41 N O7	5.617	432.295	--	--	--	-	-	-	-
Com_378_pos	2.20013e+08	2.32844e+08	2.62882e+08	2.63501e+08	2.26428e+08	2.63192e+08	0.217059	0.0291917	0.140726	1.13228	SM (d14:3/12:1)	--	C31 H57 N2 O6 P	6.717	585.414	--	--	--	-	-	-	-
Com_1731_pos	1.57387e+07	1.05911e+07	5.30515e+07	4.35513e+07	1.31649e+07	4.83014e+07	1.87537	0.0228355	0.123481	1.11129	--	Dihydrocapsaicin	C18 H29 N O3	7.54	308.221	Benzene and substituted derivatives	19408-84-5	HMDB0038457	-	-	-	-
Com_971_pos	3.64898e+07	2.8021e+07	6.78451e+07	6.64775e+07	3.22554e+07	6.71613e+07	1.05809	0.0147662	0.0986346	1.10457	--	1-Monopalmitin	C19 H38 O4	7.422	353.268	Glycerolipids	32899-41-5	HMDB0011564	-	-	-	-
Com_1161_pos	2.37729e+07	2.32453e+07	5.69484e+07	5.49635e+07	2.35091e+07	5.5956e+07	1.25107	0.00100013	0.0467986	1.07607	Prostaglandin E2-1-glyceryl ester	--	C23 H38 O7	7.41	409.255	--	--	--	-	-	-	-
Com_470_pos	2.31721e+08	2.27016e+08	1.99719e+08	1.94867e+08	2.29368e+08	1.97293e+08	-0.217322	0.0109193	0.0922271	1.06126	Idebenone	--	C19 H30 O5	6.15	339.216	--	--	--	-	-	-	-
Com_2515_pos	3.52842e+07	3.47446e+07	4.79972e+06	4.12255e+06	3.50144e+07	4.46114e+06	-2.97247	0.000200733	0.0459533	1.04295	--	N-[(-)-Jasmonoyl]-(L)-Isoleucine	C18 H29 N O4	5.43	324.216	--	--	--	-	-	-	-
Com_485_pos	1.12042e+08	1.24874e+08	1.47468e+08	1.53095e+08	1.18458e+08	1.50282e+08	0.343296	0.0451997	0.174798	1.0414	5-(6-hydroxy-6-methyloctyl)-2,5-dihydrofuran-2-one	--	C13 H22 O3	5.597	209.153	--	--	--	-	-	-	-
Com_1231_pos	8.05358e+07	7.40279e+07	4.911e+07	4.65206e+07	7.72819e+07	4.78153e+07	-0.692658	0.0138327	0.09617	1.01824	Citral	--	C10 H16 O	5.319	153.127	--	--	--	-	-	-	-

## Sheet: POS_CK-T2
					Table S2: Differential metabolites in mulberry leaves response to various Mg applications and deficiency
index	CK-1	CK-2	T2-1	T2-2	control_mean	case_mean	log2_FC(case_mean/control_mean)	Pvalue	fdr	vip	MS2_name	MS1_name	formula	rtmin	mz	Class	CAS	HMDB	C_ID	Pathway	KEGG_B_class	KEGG_A_class
Com_22_pos	2.02661e+09	1.79646e+09	7.8325e+09	7.75453e+09	1.91153e+09	7.79352e+09	2.02755	0.000426391	0.0123892	10.157	Indole-3-acrylic acid	--	C11 H9 N O2	5.088	188.07	--	--	--	-	-	-	-
Com_23_pos	1.99566e+09	1.76032e+09	7.73526e+09	7.65934e+09	1.87799e+09	7.6973e+09	2.03516	0.000451142	0.0123892	10.1025	DL-Tryptophan	--	C11 H12 N2 O2	5.087	205.097	Indoles and derivatives	54-12-6	HMDB0030396	-	-	-	-
Com_3_pos	1.26395e+10	1.11788e+10	1.80539e+10	1.66742e+10	1.19092e+10	1.7364e+10	0.544028	0.0322854	0.0824893	9.62639	Oleamide	--	C18 H35 N O	9.924	282.278	Fatty Acyls	301-02-0	HMDB0002117	-	-	-	-
Com_18_pos	5.44946e+09	5.46362e+09	3.00425e+09	3.04979e+09	5.45654e+09	3.02702e+09	-0.850089	9.62861e-05	0.00756957	6.52972	伪-Eleostearic acid	--	C18 H30 O2	7.939	279.231	--	--	--	-	-	-	-
Com_65_pos	2.19348e+08	1.83784e+08	2.26939e+09	2.28863e+09	2.01566e+08	2.27901e+09	3.49908	9.47117e-05	0.00756957	6.03713	Pipecolic acid	--	C6 H11 N O2	1.762	130.086	Carboxylic acids and derivatives	3105-95-1	HMDB0000716	C00408	ko01100//Metabolic pathways;ko01110//Biosynthesis of secondary metabolites;ko00960//Tropane, piperidine and pyridine alkaloid biosynthesis;ko00310//Lysine degradation	Amino acid metabolism;Biosynthesis of other secondary metabolites;Global and overview maps	Metabolism
Com_39_pos	1.30556e+09	1.25406e+09	3.28815e+09	3.34561e+09	1.27981e+09	3.31688e+09	1.3739	0.000358471	0.0123892	5.97675	--	Pheophorbide A	C35 H36 N4 O5	10.514	593.275	--	--	--	C18021	ko01110//Biosynthesis of secondary metabolites;ko00860//Porphyrin and chlorophyll metabolism	Global and overview maps;Metabolism of cofactors and vitamins	Metabolism
Com_6_pos	1.38027e+10	1.33807e+10	1.17033e+10	1.15236e+10	1.35917e+10	1.16135e+10	-0.226931	0.0131718	0.0493098	5.85517	Palmitoleic Acid	--	C16 H30 O2	7.534	277.215	Fatty Acyls	10030-73-6	HMDB0012328	C08362	ko00061//Fatty acid biosynthesis	Lipid metabolism	Metabolism
Com_42_pos	1.93853e+09	1.79359e+09	3.58448e+09	3.57098e+09	1.86606e+09	3.57773e+09	0.939051	0.00180313	0.0214362	5.47441	--	Cinnamic Acid	C9 H8 O2	4.829	149.06	Cinnamic acids and derivatives	621-82-9	HMDB0000567	-	-	-	-
Com_44_pos	1.92223e+09	1.77959e+09	3.54736e+09	3.53546e+09	1.85091e+09	3.54141e+09	0.936089	0.00178733	0.0214362	5.44048	L-Phenylalanine	--	C9 H11 N O2	4.829	166.086	Carboxylic acids and derivatives	63-91-2	HMDB0000159	C00079	ko01100//Metabolic pathways;ko01110//Biosynthesis of secondary metabolites;ko01130//Biosynthesis of antibiotics;ko01230//Biosynthesis of amino acids;ko02010//ABC transporters;ko00940//Phenylpropanoid biosynthesis;ko00360//Phenylalanine metabolism;ko01210//2-Oxocarboxylic acid metabolism;ko00970//Aminoacyl-tRNA biosynthesis;ko00960//Tropane, piperidine and pyridine alkaloid biosynthesis;ko00400//P…	Amino acid metabolism;Biosynthesis of other secondary metabolites;Global and overview maps;Membrane transport;Metabolism of other amino acids;Translation	Environmental Information Processing;Genetic Information Processing;Metabolism
Com_28_pos	4.89612e+09	4.74005e+09	3.15353e+09	3.25473e+09	4.81809e+09	3.20413e+09	-0.588526	0.00330413	0.0270218	5.31634	LPC 16:2	--	C24 H46 N O7 P	5.292	492.316	--	--	--	-	-	-	-
Com_32_pos	4.16748e+09	3.63417e+09	2.36854e+09	2.23081e+09	3.90083e+09	2.29967e+09	-0.76235	0.028334	0.0751782	5.22921	2,3-dihydroxypropyl 12-methyltridecanoate	--	C17 H34 O4	7.579	325.236	--	--	--	-	-	-	-
Com_41_pos	3.3568e+09	3.15811e+09	1.91101e+09	1.90332e+09	3.25745e+09	1.90716e+09	-0.772317	0.00537708	0.0323257	4.85711	Proline	--	C5 H9 N O2	1.367	116.07	Carboxylic acids and derivatives	344-25-2	HMDB0003411	-	-	-	-
Com_33_pos	3.21655e+09	3.22613e+09	2.12298e+09	2.2175e+09	3.22134e+09	2.17024e+09	-0.569806	0.00203645	0.0223791	4.292	5伪-Dihydrotestosterone	--	C19 H30 O2	8.256	291.231	--	--	--	-	-	-	-
Com_69_pos	2.0873e+09	1.95482e+09	9.72297e+08	9.76736e+08	2.02106e+09	9.74517e+08	-1.05235	0.00398638	0.0290587	4.27892	9-Oxo-ODE	--	C18 H30 O3	7.827	295.226	Fatty Acyls	-	HMDB0004669	C14766	ko00591//Linoleic acid metabolism	Lipid metabolism	Metabolism
Com_53_pos	1.80686e+09	1.85155e+09	2.74811e+09	2.90412e+09	1.8292e+09	2.82611e+09	0.627604	0.00656023	0.0345158	4.16684	伪-Linolenic acid	--	C18 H30 O2	9.588	279.231	--	--	--	-	-	-	-
Com_95_pos	2.39168e+08	2.11123e+08	1.15482e+09	9.29099e+08	2.25145e+08	1.04196e+09	2.21037	0.0188407	0.0592467	3.75419	Oleoyl ethylamide	--	C20 H39 N O	10.768	310.31	--	--	--	-	-	-	-
Com_177_pos	7.88663e+07	6.78981e+07	7.36848e+08	7.36353e+08	7.33822e+07	7.366e+08	3.32738	6.85077e-05	0.00756957	3.41129	--	Cycloleucine	C6 H11 N O2	1.54	130.086	--	--	--	-	-	-	-
Com_171_pos	7.71831e+08	7.44147e+08	9.14568e+07	2.04959e+08	7.57989e+08	1.48208e+08	-2.35455	0.00905256	0.0414875	3.25949	Octadecanedioic acid	--	C18 H34 O4	8.358	315.252	Fatty Acyls	871-70-5	HMDB0000782	-	-	-	-
Com_77_pos	1.3094e+09	1.30087e+09	7.57398e+08	7.85878e+08	1.30513e+09	7.71638e+08	-0.758201	0.000775428	0.015699	3.05948	Bicyclo prostaglandin E2	--	C20 H30 O4	7.898	335.218	--	--	--	-	-	-	-
Com_55_pos	1.00437e+09	1.03169e+09	1.48218e+09	1.50717e+09	1.01803e+09	1.49467e+09	0.554054	0.00150458	0.0204528	2.88994	--	Denin	C33 H56 O14	8.075	677.371	--	--	--	-	-	-	-
Com_231_pos	7.71076e+07	7.69055e+07	5.38163e+08	5.58079e+08	7.70066e+07	5.48121e+08	2.83144	0.000446526	0.0123892	2.8742	Indole-3-lactic acid	--	C11 H11 N O3	5.474	206.081	Indoles and derivatives	1821-52-9	HMDB0000671	-	-	-	-
Com_209_pos	5.97556e+08	5.89473e+08	1.62876e+08	1.49923e+08	5.93515e+08	1.56399e+08	-1.92405	0.000304876	0.0123892	2.76907	(+/-)12(13)-DiHOME	--	C18 H34 O4	8.436	297.242	--	--	--	-	-	-	-
Com_232_pos	1.23923e+08	1.19846e+08	4.99184e+08	5.56724e+08	1.21885e+08	5.27954e+08	2.1149	0.0050071	0.0312331	2.66112	LPC 18:3	--	C26 H48 N O7 P	8.491	518.323	--	--	--	-	-	-	-
Com_168_pos	3.89159e+08	4.46122e+08	7.90858e+08	8.13466e+08	4.17641e+08	8.02162e+08	0.941631	0.00629078	0.0338378	2.59018	L-Glutamic acid	--	C5 H9 N O4	1.31	148.06	Carboxylic acids and derivatives	-	HMDB0060475	C00025	ko01100//Metabolic pathways;ko01110//Biosynthesis of secondary metabolites;ko01120//Microbial metabolism in diverse environments;ko01130//Biosynthesis of antibiotics;ko01230//Biosynthesis of amino acids;ko02010//ABC transporters;ko01200//Carbon metabolism;ko01210//2-Oxocarboxylic acid metabolism;ko00250//Alanine, aspartate and glutamate metabolism;ko00970//Aminoacyl-tRNA biosynthesis;ko00220//Arg…	Amino acid metabolism;Biosynthesis of other secondary metabolites;Carbohydrate metabolism;Energy metabolism;Global and overview maps;Membrane transport;Metabolism of cofactors and vitamins;Metabolism of other amino acids;Translation	Environmental Information Processing;Genetic Information Processing;Metabolism
Com_152_pos	9.22424e+08	9.07217e+08	5.62037e+08	5.03911e+08	9.14821e+08	5.32974e+08	-0.779424	0.00613272	0.0333261	2.57939	--	9-Hydroxy-(10E,12Z,15Z)-Octadecatrienoic Acid	C18 H30 O3	6.774	295.226	--	--	--	-	-	-	-
Com_306_pos	6.61383e+06	5.89894e+06	3.71753e+08	3.74676e+08	6.25638e+06	3.73215e+08	5.89853	1.68031e-05	0.00520748	2.53756	gamma-Glutamyltyrosine	--	C14 H18 N2 O6	6.43	311.127	Carboxylic acids and derivatives	7432-23-7	HMDB0011741	-	-	-	-
Com_59_pos	7.8067e+08	7.69208e+08	1.14038e+09	1.12797e+09	7.74939e+08	1.13417e+09	0.549487	0.000552123	0.0131226	2.51024	--	MAG (18:3)	C21 H36 O4	8.074	353.268	--	--	--	-	-	-	-
Com_211_pos	3.14927e+08	2.80612e+08	6.15092e+08	6.15103e+08	2.97769e+08	6.15098e+08	1.04662	0.0029107	0.0260942	2.35554	Pantothenic acid	--	C9 H17 N O5	4.963	220.118	Alcohols and polyols	79-83-4	HMDB0000210	C00864	ko01100//Metabolic pathways;ko01110//Biosynthesis of secondary metabolites;ko00410//beta-Alanine metabolism;ko00770//Pantothenate and CoA biosynthesis	Global and overview maps;Metabolism of cofactors and vitamins;Metabolism of other amino acids	Metabolism
Com_193_pos	4.84511e+08	4.79617e+08	1.3013e+08	2.49936e+08	4.82064e+08	1.90033e+08	-1.34297	0.0396561	0.0933837	2.22245	1,2-dihydroxyheptadec-16-yn-4-yl acetate	--	C19 H34 O4	7.807	349.234	--	--	--	-	-	-	-
Com_358_pos	3.30215e+08	3.06804e+08	3.75392e+07	3.64902e+07	3.18509e+08	3.70147e+07	-3.10516	0.0017282	0.0214362	2.22128	L-Pyroglutamic acid	--	C5 H7 N O3	2.179	130.05	Carboxylic acids and derivatives	98-79-3	HMDB0000267	C01879	ko01100//Metabolic pathways;ko00480//Glutathione metabolism	Global and overview maps;Metabolism of other amino acids	Metabolism
Com_249_pos	1.95196e+08	1.83223e+08	5.03441e+08	4.32822e+08	1.89209e+08	4.68131e+08	1.30693	0.0160896	0.0533884	2.19659	--	3-Amino-4-methylpentanoic acid	C6 H13 N O2	2.725	132.102	Carboxylic acids and derivatives	5699-54-7	HMDB0003640	-	-	-	-
Com_253_pos	7.76056e+07	6.82286e+07	3.55417e+08	2.89169e+08	7.29171e+07	3.22293e+08	2.14404	0.017525	0.0563224	2.07562	Stearamide	--	C18 H37 N O	10.578	284.294	Fatty Acyls	124-26-5	HMDB0034146	-	-	-	-
Com_296_pos	3.97747e+08	3.12098e+08	1.08098e+08	1.02168e+08	3.54923e+08	1.05133e+08	-1.75529	0.0282861	0.0751782	2.06608	VLH	--	C17 H29 N5 O4	5.623	373.184	--	--	--	-	-	-	-
Com_365_pos	8.24119e+07	7.17172e+07	3.20363e+08	3.06653e+08	7.70645e+07	3.13508e+08	2.02437	0.00134925	0.0194262	2.03582	Indole	--	C8 H7 N	5.087	118.065	Heteroaromatic compounds	109-97-7	HMDB0035924	C00463	ko01100//Metabolic pathways;ko01110//Biosynthesis of secondary metabolites;ko00400//Phenylalanine, tyrosine and tryptophan biosynthesis;ko00380//Tryptophan metabolism;ko00402//Benzoxazinoid biosynthesis	Amino acid metabolism;Biosynthesis of other secondary metabolites;Global and overview maps	Metabolism
Com_350_pos	3.33667e+08	3.15189e+08	9.82849e+07	1.07384e+08	3.24428e+08	1.02835e+08	-1.65757	0.00215304	0.0230549	1.97078	1,4-dihydroxyheptadec-16-en-2-yl acetate	--	C19 H36 O4	8.27	311.258	--	--	--	-	-	-	-
Com_252_pos	4.97182e+08	4.64261e+08	2.68469e+08	2.61718e+08	4.80721e+08	2.65093e+08	-0.858701	0.00601789	0.0333261	1.94016	N-[2-chloro-6-(trifluoromethoxy)phenyl]-2,2-dimethylpropanamide	--	C12 H13 Cl F3 N O2	1.243	296.065	--	--	--	-	-	-	-
Com_507_pos	1.54443e+07	1.54398e+07	2.2181e+08	2.22204e+08	1.54421e+07	2.22007e+08	3.84567	9.06226e-07	0.000926163	1.90394	Cinanserin	--	C20 H24 N2 O S	6.775	341.174	--	--	--	-	-	-	-
Com_160_pos	4.76232e+08	4.6206e+08	2.87351e+08	2.68459e+08	4.69146e+08	2.77905e+08	-0.755446	0.00379113	0.0287003	1.8282	SM (d14:2/12:1)	--	C31 H59 N2 O6 P	7.514	587.43	--	--	--	-	-	-	-
Com_226_pos	4.91379e+08	4.53867e+08	2.91006e+08	2.71797e+08	4.72623e+08	2.81402e+08	-0.748058	0.0119269	0.0475484	1.82136	4-oxododecanedioic acid	--	C12 H20 O5	5.758	227.125	--	--	--	-	-	-	-
Com_196_pos	4.87337e+08	4.52679e+08	2.90337e+08	2.91589e+08	4.70008e+08	2.90963e+08	-0.69185	0.00924993	0.0418293	1.76559	(12Z)-9,10,11-trihydroxyoctadec-12-enoic acid	--	C18 H34 O5	6.294	353.229	--	--	--	-	-	-	-
Com_325_pos	3.43418e+08	3.42012e+08	1.67206e+08	1.74854e+08	3.42715e+08	1.7103e+08	-1.00276	0.000512431	0.0130926	1.73571	(11E,15Z)-9,10,13-trihydroxyoctadeca-11,15-dienoic acid	--	C18 H32 O5	6.766	329.232	--	--	--	-	-	-	-
Com_230_pos	4.13893e+08	3.39548e+08	5.49184e+08	5.5886e+08	3.76721e+08	5.54022e+08	0.556448	0.0419099	0.0960357	1.72373	Vindoline	--	C25 H32 N2 O6	5.679	457.24	--	--	--	C01626	ko01110//Biosynthesis of secondary metabolites;ko00901//Indole alkaloid biosynthesis	Biosynthesis of other secondary metabolites;Global and overview maps	Metabolism
Com_500_pos	2.04909e+08	1.82655e+08	4.99184e+07	3.74338e+07	1.93782e+08	4.36761e+07	-2.14952	0.00714674	0.0359801	1.61747	Prostaglandin H1	--	C20 H34 O5	8.283	337.234	Fatty Acyls	-	HMDB0013041	-	-	-	-
Com_394_pos	3.01348e+08	2.81646e+08	1.40177e+08	1.45747e+08	2.91497e+08	1.42962e+08	-1.02785	0.00471675	0.0305096	1.61169	Jasmone	--	C11 H16 O	6.239	165.127	Organooxygen compounds	488-10-8	HMDB0035601	-	-	-	-
Com_333_pos	1.76919e+08	2.09695e+08	3.4623e+08	3.38891e+08	1.93307e+08	3.4256e+08	0.825465	0.0124248	0.0479815	1.60987	Valine	--	C5 H11 N O2	1.784	118.086	Carboxylic acids and derivatives	72-18-4	HMDB0000883	-	-	-	-
Com_708_pos	1.67873e+08	1.34384e+08	1.39781e+07	1.26092e+07	1.51129e+08	1.32937e+07	-3.50697	0.0144623	0.0508451	1.5452	--	5-oxoproline	C5 H7 N O3	1.697	130.05	Carboxylic acids and derivatives	-	HMDB0060262	C01879	ko01100//Metabolic pathways;ko00480//Glutathione metabolism	Global and overview maps;Metabolism of other amino acids	Metabolism
Com_347_pos	3.37679e+08	2.91094e+08	1.81283e+08	1.77898e+08	3.14387e+08	1.79591e+08	-0.807829	0.0287297	0.0758703	1.5174	Isoliensinine	--	C37 H42 N2 O6	6.248	611.303	Isoquinolines and derivatives	6817-41-0	HMDB0033749	-	-	-	-
Com_336_pos	1.17341e+08	1.16439e+08	2.49834e+08	2.42176e+08	1.1689e+08	2.46005e+08	1.07353	0.000890292	0.0167447	1.50495	LPE 18:3	--	C23 H42 N O7 P	8.306	476.277	--	--	--	-	-	-	-
Com_309_pos	2.45999e+08	2.28919e+08	3.73062e+08	3.49294e+08	2.37459e+08	3.61178e+08	0.60503	0.0137046	0.0500341	1.46386	Nicotinamide	--	C6 H6 N2 O	1.926	123.055	Pyridines and derivatives	98-92-0	HMDB0001406	C00153	ko01100//Metabolic pathways;ko00760//Nicotinate and nicotinamide metabolism	Global and overview maps;Metabolism of cofactors and vitamins	Metabolism
Com_470_pos	2.31721e+08	2.27016e+08	1.10022e+08	1.25014e+08	2.29368e+08	1.17518e+08	-0.964788	0.00489768	0.0311165	1.39859	Idebenone	--	C19 H30 O5	6.15	339.216	--	--	--	-	-	-	-
Com_321_pos	4.00644e+07	4.13825e+07	1.60889e+08	1.4242e+08	4.07234e+07	1.51654e+08	1.89686	0.00689362	0.0350511	1.39148	Kaempferol	--	C15 H10 O6	5.506	287.055	Flavonoids	520-18-3	HMDB0005801	C05903	ko01100//Metabolic pathways;ko01110//Biosynthesis of secondary metabolites;ko00941//Flavonoid biosynthesis;ko00944//Flavone and flavonol biosynthesis	Biosynthesis of other secondary metabolites;Global and overview maps	Metabolism
Com_485_pos	1.12042e+08	1.24874e+08	2.17798e+08	2.29609e+08	1.18458e+08	2.23703e+08	0.917209	0.00679483	0.034896	1.35433	5-(6-hydroxy-6-methyloctyl)-2,5-dihydrofuran-2-one	--	C13 H22 O3	5.597	209.153	--	--	--	-	-	-	-
Com_1073_pos	1.0148e+08	1.00373e+08	2.47399e+06	1.90027e+06	1.00927e+08	2.18713e+06	-5.52812	3.98065e-05	0.00645517	1.31635	Stercobilin	--	C33 H46 N4 O6	5.519	595.348	Tetrapyrroles and derivatives	-	HMDB0240259	C05793	ko00860//Porphyrin and chlorophyll metabolism	Metabolism of cofactors and vitamins	Metabolism
Com_872_pos	1.19187e+08	1.24715e+08	2.61584e+07	2.4376e+07	1.21951e+08	2.52672e+07	-2.27096	0.000901136	0.0167447	1.30164	Ajugol	--	C15 H24 O9	5.669	371.13	--	--	--	-	-	-	-
Com_810_pos	1.40658e+08	1.27225e+08	4.01187e+07	3.76539e+07	1.33941e+08	3.88863e+07	-1.78427	0.00512104	0.0317194	1.28873	Monoolein	--	C21 H40 O4	9.981	357.299	Glycerolipids	-	HMDB0011567	-	-	-	-
Com_603_pos	1.62829e+08	1.42708e+08	5.95078e+07	5.93265e+07	1.52768e+08	5.94172e+07	-1.36239	0.0114174	0.0464882	1.27353	fentanyl-d5	--	C22 H23 [2]H5 N2 O	7.47	360.274	--	--	--	-	-	-	-
Com_452_pos	2.29937e+08	2.22422e+08	1.37503e+08	1.36464e+08	2.26179e+08	1.36984e+08	-0.723463	0.00180383	0.0214362	1.25029	PE (3:0/16:1)	--	C24 H46 N O8 P	5.264	508.311	--	--	--	-	-	-	-
Com_548_pos	1.63323e+08	1.57199e+08	7.49963e+07	7.74695e+07	1.60261e+08	7.62329e+07	-1.07194	0.00154096	0.0204528	1.21386	Testosterone	--	C19 H28 O2	7.252	289.216	Steroids and steroid derivatives	651-45-6	HMDB0002833	C00535	ko01100//Metabolic pathways;ko01120//Microbial metabolism in diverse environments	Global and overview maps	Metabolism
Com_303_pos	1.24491e+07	1.24479e+07	9.18984e+07	9.46952e+07	1.24485e+07	9.32968e+07	2.90585	0.000299057	0.0123892	1.19079	Trifolin	--	C21 H20 O11	5.497	449.107	Flavonoids	23627-87-4	HMDB0030864	C12626	ko00944//Flavone and flavonol biosynthesis	Biosynthesis of other secondary metabolites	Metabolism
Com_863_pos	1.32915e+08	1.26153e+08	5.16073e+07	5.07285e+07	1.29534e+08	5.11679e+07	-1.34002	0.001887	0.021915	1.1719	Aurantio-obtusin 尾-D-glucoside	--	C23 H24 O12	5.665	493.133	--	--	--	-	-	-	-
Com_592_pos	1.29718e+08	1.41586e+08	5.87009e+07	5.84554e+07	1.35652e+08	5.85781e+07	-1.21148	0.00587759	0.0331873	1.15896	Avocadyne 1-acetate	--	C19 H34 O4	7.149	309.242	Fatty Acyls	24607-06-5	HMDB0031048	-	-	-	-
Com_596_pos	8.18387e+07	8.46187e+07	1.68982e+08	1.51285e+08	8.32287e+07	1.60134e+08	0.944123	0.0132948	0.0493973	1.15525	WMH	--	C22 H28 N6 O4 S	5.483	473.199	--	--	--	-	-	-	-
Com_428_pos	2.0915e+07	2.45584e+07	9.51917e+07	1.02914e+08	2.27367e+07	9.9053e+07	2.12318	0.00311516	0.0268294	1.15517	Quercetin	--	C15 H10 O7	5.41	303.049	Flavonoids	117-39-5	HMDB0005794	C00389	ko01100//Metabolic pathways;ko01110//Biosynthesis of secondary metabolites;ko00941//Flavonoid biosynthesis;ko00944//Flavone and flavonol biosynthesis	Biosynthesis of other secondary metabolites;Global and overview maps	Metabolism
Com_1145_pos	2.14833e+07	2.15225e+07	9.58975e+07	9.8231e+07	2.15029e+07	9.70642e+07	2.17441	0.000238409	0.0116183	1.15125	N-Acetyl-DL-tryptophan	--	C13 H14 N2 O3	5.494	247.107	--	--	--	-	-	-	-
Com_1138_pos	1.60993e+07	1.63949e+07	8.55064e+07	9.88507e+07	1.62471e+07	9.21786e+07	2.50425	0.00763667	0.037304	1.1491	--	trans-3-Indoleacrylic acid	C11 H9 N O2	5.49	188.07	--	--	--	-	-	-	-
Com_657_pos	1.69888e+08	1.67204e+08	9.83331e+07	9.00724e+07	1.68546e+08	9.42028e+07	-0.839305	0.00339508	0.0270218	1.13989	3-hydroxy-2-octylpentanedioic acid	--	C13 H24 O5	6.241	243.159	--	--	--	-	-	-	-
Com_292_pos	2.28046e+08	2.2649e+08	1.51274e+08	1.5652e+08	2.27268e+08	1.53897e+08	-0.562431	0.00138758	0.0194262	1.13436	PC (14:0e/2:0)	--	C24 H50 N O7 P	9.131	496.339	--	--	--	-	-	-	-
Com_683_pos	1.35687e+08	1.62136e+08	8.13723e+07	6.33609e+07	1.48912e+08	7.23666e+07	-1.04106	0.0410204	0.094634	1.13253	T-2 Triol	--	C20 H30 O7	5.669	366.175	Prenol lipids	34114-98-2	HMDB0035396	-	-	-	-
Com_524_pos	2.2121e+08	1.99478e+08	1.42003e+08	1.43806e+08	2.10344e+08	1.42904e+08	-0.557703	0.0251567	0.0696751	1.07542	Allocryptopine	--	C21 H23 N O5	1.365	370.17	--	--	--	C02134	ko01110//Biosynthesis of secondary metabolites;ko00950//Isoquinoline alkaloid biosynthesis	Biosynthesis of other secondary metabolites;Global and overview maps	Metabolism
Com_1457_pos	6.69016e+06	5.94344e+06	7.05298e+07	7.3035e+07	6.3168e+06	7.17824e+07	3.50636	0.000398382	0.0123892	1.07143	MGDG (3:0/3:0)	--	C15 H26 O10	1.378	384.185	--	--	--	-	-	-	-
Com_829_pos	1.31991e+08	1.31888e+08	6.76516e+07	6.8672e+07	1.31939e+08	6.81618e+07	-0.95284	6.4642e-05	0.00756957	1.05799	Guanine	--	C5 H5 N5 O	3.184	152.057	Imidazopyrimidines	73-40-5	HMDB0000132	C00242	ko01100//Metabolic pathways;ko00230//Purine metabolism	Global and overview maps;Nucleotide metabolism	Metabolism
Com_659_pos	8.98933e+07	8.90772e+07	2.80915e+07	2.56727e+07	8.94852e+07	2.68821e+07	-1.735	0.000415422	0.0123892	1.04782	SM (d14:0/12:1)	--	C31 H63 N2 O6 P	7.921	591.462	--	--	--	-	-	-	-

## Sheet: POS_CK-T3
index	CK-1	CK-2	T3-1	T3-2	control_mean	case_mean	log2_FC(case_mean/control_mean)	Pvalue	fdr	vip	MS2_name	MS1_name	formula	rtmin	mz	Class	CAS	HMDB	C_ID	Pathway	KEGG_B_class	KEGG_A_class
Com_3_pos	1.26395e+10	1.11788e+10	2.38207e+10	2.46281e+10	1.19092e+10	2.42244e+10	1.02439	0.00456027	0.0402331	16.0199	Oleamide	--	C18 H35 N O	9.924	282.278	Fatty Acyls	301-02-0	HMDB0002117	-	-	-	-
Com_39_pos	1.30556e+09	1.25406e+09	4.09515e+09	4.40462e+09	1.27981e+09	4.24988e+09	1.73149	0.00277771	0.0363499	7.87344	--	Pheophorbide A	C35 H36 N4 O5	10.514	593.275	--	--	--	C18021	ko01110//Biosynthesis of secondary metabolites;ko00860//Porphyrin and chlorophyll metabolism	Global and overview maps;Metabolism of cofactors and vitamins	Metabolism
Com_55_pos	1.00437e+09	1.03169e+09	3.25514e+09	2.98382e+09	1.01803e+09	3.11948e+09	1.61553	0.00418322	0.0399556	6.61237	--	Denin	C33 H56 O14	8.075	677.371	--	--	--	-	-	-	-
Com_59_pos	7.8067e+08	7.69208e+08	2.92562e+09	2.74107e+09	7.74939e+08	2.83334e+09	1.87035	0.00201126	0.0363499	6.5526	--	MAG (18:3)	C21 H36 O4	8.074	353.268	--	--	--	-	-	-	-
Com_31_pos	1.46973e+09	1.40417e+09	2.99115e+09	2.88762e+09	1.43695e+09	2.93939e+09	1.03251	0.0016589	0.0353033	5.60006	PC (16:2e/2:0)	--	C26 H50 N O7 P	8.796	520.339	--	--	--	-	-	-	-
Com_95_pos	2.39168e+08	2.11123e+08	1.57e+09	1.6601e+09	2.25145e+08	1.61505e+09	2.84265	0.00115036	0.0346581	5.38979	Oleoyl ethylamide	--	C20 H39 N O	10.768	310.31	--	--	--	-	-	-	-
Com_6_pos	1.38027e+10	1.33807e+10	1.51128e+10	1.48244e+10	1.35917e+10	1.49686e+10	0.139214	0.0327609	0.0937862	5.27754	Palmitoleic Acid	--	C16 H30 O2	7.534	277.215	Fatty Acyls	10030-73-6	HMDB0012328	C08362	ko00061//Fatty acid biosynthesis	Lipid metabolism	Metabolism
Com_66_pos	1.03415e+09	9.60314e+08	2.09619e+09	2.4075e+09	9.97233e+08	2.25185e+09	1.17511	0.0158723	0.0633651	5.08653	Hexadecanamide	--	C16 H33 N O	9.701	256.263	Fatty Acyls	629-54-9	HMDB0012273	-	-	-	-
Com_35_pos	3.72842e+09	3.61818e+09	4.75229e+09	4.6148e+09	3.6733e+09	4.68354e+09	0.350522	0.00752169	0.048653	4.57819	Choline	--	C5 H13 N O	1.29	104.107	Organonitrogen compounds	62-49-7	HMDB0000097	C00114	ko01100//Metabolic pathways;ko02010//ABC transporters;ko00260//Glycine, serine and threonine metabolism;ko00564//Glycerophospholipid metabolism	Amino acid metabolism;Global and overview maps;Lipid metabolism;Membrane transport	Environmental Information Processing;Metabolism
Com_69_pos	2.0873e+09	1.95482e+09	1.20084e+09	1.21098e+09	2.02106e+09	1.20591e+09	-0.744991	0.00657615	0.0468761	4.11354	9-Oxo-ODE	--	C18 H30 O3	7.827	295.226	Fatty Acyls	-	HMDB0004669	C14766	ko00591//Linoleic acid metabolism	Lipid metabolism	Metabolism
Com_65_pos	2.19348e+08	1.83784e+08	9.90953e+08	9.51974e+08	2.01566e+08	9.71464e+08	2.26891	0.0011722	0.0346581	4.01002	Pipecolic acid	--	C6 H11 N O2	1.762	130.086	Carboxylic acids and derivatives	3105-95-1	HMDB0000716	C00408	ko01100//Metabolic pathways;ko01110//Biosynthesis of secondary metabolites;ko00960//Tropane, piperidine and pyridine alkaloid biosynthesis;ko00310//Lysine degradation	Amino acid metabolism;Biosynthesis of other secondary metabolites;Global and overview maps	Metabolism
Com_22_pos	2.02661e+09	1.79646e+09	2.69058e+09	2.65707e+09	1.91153e+09	2.67383e+09	0.484176	0.0224891	0.0782117	3.9498	Indole-3-acrylic acid	--	C11 H9 N O2	5.088	188.07	--	--	--	-	-	-	-
Com_23_pos	1.99566e+09	1.76032e+09	2.651e+09	2.62366e+09	1.87799e+09	2.63733e+09	0.489888	0.0234854	0.0791208	3.9403	DL-Tryptophan	--	C11 H12 N2 O2	5.087	205.097	Indoles and derivatives	54-12-6	HMDB0030396	-	-	-	-
Com_77_pos	1.3094e+09	1.30087e+09	1.97987e+09	1.86764e+09	1.30513e+09	1.92375e+09	0.559728	0.00817518	0.0493131	3.58003	Bicyclo prostaglandin E2	--	C20 H30 O4	7.898	335.218	--	--	--	-	-	-	-
Com_171_pos	7.71831e+08	7.44147e+08	2.68339e+08	2.75851e+08	7.57989e+08	2.72095e+08	-1.47807	0.000870184	0.0317617	3.18577	Octadecanedioic acid	--	C18 H34 O4	8.358	315.252	Fatty Acyls	871-70-5	HMDB0000782	-	-	-	-
Com_253_pos	7.76056e+07	6.82286e+07	4.20124e+08	5.02775e+08	7.29171e+07	4.61449e+08	2.66184	0.0112654	0.0537252	2.83665	Stearamide	--	C18 H37 N O	10.578	284.294	Fatty Acyls	124-26-5	HMDB0034146	-	-	-	-
Com_33_pos	3.21655e+09	3.22613e+09	3.59065e+09	3.53519e+09	3.22134e+09	3.56292e+09	0.145399	0.00672015	0.0468761	2.6621	5伪-Dihydrotestosterone	--	C19 H30 O2	8.256	291.231	--	--	--	-	-	-	-
Com_306_pos	6.61383e+06	5.89894e+06	3.58104e+08	3.3335e+08	6.25638e+06	3.45727e+08	5.78816	0.00132777	0.0346832	2.66207	gamma-Glutamyltyrosine	--	C14 H18 N2 O6	6.43	311.127	Carboxylic acids and derivatives	7432-23-7	HMDB0011741	-	-	-	-
Com_209_pos	5.97556e+08	5.89473e+08	2.6905e+08	2.63551e+08	5.93515e+08	2.66301e+08	-1.15623	0.000223124	0.0317617	2.61565	(+/-)12(13)-DiHOME	--	C18 H34 O4	8.436	297.242	--	--	--	-	-	-	-
Com_257_pos	2.20178e+08	2.15564e+08	5.18475e+08	5.12621e+08	2.17871e+08	5.15548e+08	1.24264	0.000156691	0.0317617	2.49481	LPE 18:2	--	C23 H44 N O7 P	8.813	478.292	--	--	--	-	-	-	-
Com_53_pos	1.80686e+09	1.85155e+09	1.52921e+09	1.55681e+09	1.8292e+09	1.54301e+09	-0.245467	0.00831701	0.0493131	2.43637	伪-Linolenic acid	--	C18 H30 O2	9.588	279.231	--	--	--	-	-	-	-
Com_229_pos	3.16282e+08	2.73385e+08	5.88582e+08	5.5216e+08	2.94834e+08	5.70371e+08	0.952	0.0102675	0.0523776	2.38794	Reserpine	--	C33 H40 N2 O9	9.911	609.269	Yohimbine alkaloids	50-55-5	HMDB0014351	-	-	-	-
Com_358_pos	3.30215e+08	3.06804e+08	5.29605e+07	4.3816e+07	3.18509e+08	4.83883e+07	-2.71861	0.00215742	0.0363499	2.37403	L-Pyroglutamic acid	--	C5 H7 N O3	2.179	130.05	Carboxylic acids and derivatives	98-79-3	HMDB0000267	C01879	ko01100//Metabolic pathways;ko00480//Glutathione metabolism	Global and overview maps;Metabolism of other amino acids	Metabolism
Com_211_pos	3.14927e+08	2.80612e+08	5.8688e+08	5.50967e+08	2.97769e+08	5.68924e+08	0.93404	0.00828536	0.0493131	2.37108	Pantothenic acid	--	C9 H17 N O5	4.963	220.118	Alcohols and polyols	79-83-4	HMDB0000210	C00864	ko01100//Metabolic pathways;ko01110//Biosynthesis of secondary metabolites;ko00410//beta-Alanine metabolism;ko00770//Pantothenate and CoA biosynthesis	Global and overview maps;Metabolism of cofactors and vitamins;Metabolism of other amino acids	Metabolism
Com_296_pos	3.97747e+08	3.12098e+08	8.9712e+07	1.02551e+08	3.54923e+08	9.61314e+07	-1.88443	0.0268748	0.0837381	2.29278	VLH	--	C17 H29 N5 O4	5.623	373.184	--	--	--	-	-	-	-
Com_347_pos	3.37679e+08	2.91094e+08	6.47393e+07	6.37758e+07	3.14387e+08	6.42576e+07	-2.2906	0.00856419	0.0493131	2.27638	Isoliensinine	--	C37 H42 N2 O6	6.248	611.303	Isoquinolines and derivatives	6817-41-0	HMDB0033749	-	-	-	-
Com_350_pos	3.33667e+08	3.15189e+08	8.43236e+07	7.84877e+07	3.24428e+08	8.14057e+07	-1.9947	0.00158577	0.0353033	2.25242	1,4-dihydroxyheptadec-16-en-2-yl acetate	--	C19 H36 O4	8.27	311.258	--	--	--	-	-	-	-
Com_252_pos	4.97182e+08	4.64261e+08	2.19764e+08	2.55221e+08	4.80721e+08	2.37492e+08	-1.01732	0.00974837	0.0510914	2.24254	N-[2-chloro-6-(trifluoromethoxy)phenyl]-2,2-dimethylpropanamide	--	C12 H13 Cl F3 N O2	1.243	296.065	--	--	--	-	-	-	-
Com_436_pos	6.02766e+07	5.51627e+07	2.93053e+08	2.68722e+08	5.77197e+07	2.80887e+08	2.28286	0.00308858	0.0367038	2.15634	--	DGMG (18:2)	C33 H58 O14	8.559	679.39	--	--	--	-	-	-	-
Com_336_pos	1.17341e+08	1.16439e+08	3.19094e+08	3.06449e+08	1.1689e+08	3.12772e+08	1.41995	0.00104546	0.0346581	2.02251	LPE 18:3	--	C23 H42 N O7 P	8.306	476.277	--	--	--	-	-	-	-
Com_222_pos	5.56815e+08	5.56219e+08	3.48462e+08	4.13249e+08	5.56517e+08	3.80856e+08	-0.54718	0.0323675	0.0937098	1.88302	Enalaprilat	--	C18 H24 N2 O5	6.883	349.177	Carboxylic acids and derivatives	76420-72-9	HMDB0041886	-	-	-	-
Com_507_pos	1.54443e+07	1.54398e+07	1.81313e+08	1.7349e+08	1.54421e+07	1.77402e+08	3.52208	0.000582775	0.0317617	1.83958	Cinanserin	--	C20 H24 N2 O S	6.775	341.174	--	--	--	-	-	-	-
Com_394_pos	3.01348e+08	2.81646e+08	1.57453e+08	1.42627e+08	2.91497e+08	1.5004e+08	-0.958136	0.00751057	0.048653	1.71357	Jasmone	--	C11 H16 O	6.239	165.127	Organooxygen compounds	488-10-8	HMDB0035601	-	-	-	-
Com_375_pos	9.17474e+07	8.782e+07	2.19677e+08	2.32031e+08	8.97837e+07	2.25854e+08	1.33087	0.00226131	0.0363499	1.68565	Acetophenone	--	C8 H8 O	2.457	121.065	Organooxygen compounds	98-86-2	HMDB0033910	C07113	ko01120//Microbial metabolism in diverse environments;ko01220//Degradation of aromatic compounds	Global and overview maps	Metabolism
Com_708_pos	1.67873e+08	1.34384e+08	1.63977e+07	1.52802e+07	1.51129e+08	1.5839e+07	-3.25423	0.0149911	0.0623495	1.6685	--	5-oxoproline	C5 H7 N O3	1.697	130.05	Carboxylic acids and derivatives	-	HMDB0060262	C01879	ko01100//Metabolic pathways;ko00480//Glutathione metabolism	Global and overview maps;Metabolism of other amino acids	Metabolism
Com_231_pos	7.71076e+07	7.69055e+07	2.06177e+08	2.13133e+08	7.70066e+07	2.09655e+08	1.44496	0.000687246	0.0317617	1.66531	Indole-3-lactic acid	--	C11 H11 N O3	5.474	206.081	Indoles and derivatives	1821-52-9	HMDB0000671	-	-	-	-
Com_416_pos	1.40382e+08	1.30153e+08	2.77902e+08	2.55111e+08	1.35267e+08	2.66507e+08	0.978356	0.00893722	0.0499117	1.6486	Isorhapontigenin	--	C15 H14 O4	5.787	259.096	Stilbenes	-	HMDB0128522	-	-	-	-
Com_500_pos	2.04909e+08	1.82655e+08	5.94615e+07	6.73886e+07	1.93782e+08	6.34251e+07	-1.61131	0.00811047	0.0493131	1.64342	Prostaglandin H1	--	C20 H34 O5	8.283	337.234	Fatty Acyls	-	HMDB0013041	-	-	-	-
Com_558_pos	1.00234e+08	8.5584e+07	2.26622e+08	2.04548e+08	9.29089e+07	2.15585e+08	1.21437	0.01146	0.0537252	1.592	2-Hydroxycinnamic acid	--	C9 H8 O3	5.209	165.054	Cinnamic acids and derivatives	-	HMDB0134028	C01772	ko01110//Biosynthesis of secondary metabolites;ko01120//Microbial metabolism in diverse environments;ko00940//Phenylpropanoid biosynthesis;ko00360//Phenylalanine metabolism	Amino acid metabolism;Biosynthesis of other secondary metabolites;Global and overview maps	Metabolism
Com_325_pos	3.43418e+08	3.42012e+08	2.24142e+08	2.19589e+08	3.42715e+08	2.21865e+08	-0.627325	0.000388572	0.0317617	1.58963	(11E,15Z)-9,10,13-trihydroxyoctadeca-11,15-dienoic acid	--	C18 H32 O5	6.766	329.232	--	--	--	-	-	-	-
Com_470_pos	2.31721e+08	2.27016e+08	1.25601e+08	9.11452e+07	2.29368e+08	1.08373e+08	-1.08166	0.0200334	0.0726035	1.57611	Idebenone	--	C19 H30 O5	6.15	339.216	--	--	--	-	-	-	-
Com_586_pos	9.64717e+07	8.20359e+07	2.17798e+08	1.95615e+08	8.92538e+07	2.06706e+08	1.2116	0.0124576	0.0558406	1.55692	Coumarin	--	C9 H6 O2	5.324	147.044	Coumarins and derivatives	91-64-5	HMDB0001218	C05851	ko01110//Biosynthesis of secondary metabolites;ko00940//Phenylpropanoid biosynthesis	Biosynthesis of other secondary metabolites;Global and overview maps	Metabolism
Com_378_pos	2.20013e+08	2.32844e+08	1.29131e+08	1.04435e+08	2.26428e+08	1.16783e+08	-0.955224	0.0157271	0.0632799	1.5039	SM (d14:3/12:1)	--	C31 H57 N2 O6 P	6.717	585.414	--	--	--	-	-	-	-
Com_524_pos	2.2121e+08	1.99478e+08	1.06823e+08	1.08315e+08	2.10344e+08	1.07569e+08	-0.967486	0.011045	0.0533666	1.45717	Allocryptopine	--	C21 H23 N O5	1.365	370.17	--	--	--	C02134	ko01110//Biosynthesis of secondary metabolites;ko00950//Isoquinoline alkaloid biosynthesis	Biosynthesis of other secondary metabolites;Global and overview maps	Metabolism
Com_1073_pos	1.0148e+08	1.00373e+08	554946	1.09471e+06	1.00927e+08	824829	-6.93499	3.77873e-05	0.0193093	1.44679	Stercobilin	--	C33 H46 N4 O6	5.519	595.348	Tetrapyrroles and derivatives	-	HMDB0240259	C05793	ko00860//Porphyrin and chlorophyll metabolism	Metabolism of cofactors and vitamins	Metabolism
Com_971_pos	3.64898e+07	2.8021e+07	1.28994e+08	1.25671e+08	3.22554e+07	1.27332e+08	1.98098	0.00228115	0.0363499	1.40861	--	1-Monopalmitin	C19 H38 O4	7.422	353.268	Glycerolipids	32899-41-5	HMDB0011564	-	-	-	-
Com_872_pos	1.19187e+08	1.24715e+08	3.37566e+07	3.11766e+07	1.21951e+08	3.24666e+07	-1.90927	0.00116	0.0346581	1.36754	Ajugol	--	C15 H24 O9	5.669	371.13	--	--	--	-	-	-	-
Com_345_pos	1.09466e+08	9.16862e+07	1.99977e+08	1.77817e+08	1.00576e+08	1.88897e+08	0.90931	0.0249071	0.0809636	1.34152	Glu-Val-Phe	--	C19 H27 N3 O6	5.339	394.208	--	--	--	-	-	-	-
Com_571_pos	1.71238e+08	1.4965e+08	7.54781e+07	7.0604e+07	1.60444e+08	7.30411e+07	-1.13529	0.015654	0.0632348	1.34086	4'-methyl Acetyl fentanyl-d5	--	C22 H23 [2]H5 N2 O	7.469	342.263	--	--	--	-	-	-	-
Com_292_pos	2.28046e+08	2.2649e+08	3.21074e+08	3.01918e+08	2.27268e+08	3.11496e+08	0.454819	0.0127685	0.0561825	1.31774	PC (14:0e/2:0)	--	C24 H50 N O7 P	9.131	496.339	--	--	--	-	-	-	-
Com_152_pos	9.22424e+08	9.07217e+08	8.24317e+08	8.37775e+08	9.14821e+08	8.31046e+08	-0.138561	0.0143724	0.0606965	1.31281	--	9-Hydroxy-(10E,12Z,15Z)-Octadecatrienoic Acid	C18 H30 O3	6.774	295.226	--	--	--	-	-	-	-
Com_603_pos	1.62829e+08	1.42708e+08	7.21063e+07	6.61716e+07	1.52768e+08	6.9139e+07	-1.14378	0.0153696	0.0629304	1.31187	fentanyl-d5	--	C22 H23 [2]H5 N2 O	7.47	360.274	--	--	--	-	-	-	-
Com_702_pos	1.29572e+08	1.53089e+08	6.01242e+07	5.58724e+07	1.4133e+08	5.79983e+07	-1.28499	0.0199489	0.0725542	1.30799	Ecgonine methyl ester	--	C10 H17 N O3	2.364	200.128	Carboxylic acids and derivatives	-	HMDB0062751	C12448	ko01100//Metabolic pathways;ko01110//Biosynthesis of secondary metabolites;ko00960//Tropane, piperidine and pyridine alkaloid biosynthesis	Biosynthesis of other secondary metabolites;Global and overview maps	Metabolism
Com_561_pos	1.1005e+08	1.37453e+08	2.18062e+08	1.96947e+08	1.23752e+08	2.07504e+08	0.745694	0.0401044	0.107015	1.29455	(2E,4E)-N-(2-methylpropyl)dodeca-2,4-dienamide	--	C16 H29 N O	8.562	252.232	--	--	--	-	-	-	-
Com_1085_pos	8.79308e+07	9.95066e+07	1.92987e+07	1.75157e+07	9.37187e+07	1.84072e+07	-2.34806	0.00599221	0.0462238	1.25178	--	Ferruginol	C20 H30 O	6.195	287.236	--	--	--	C09092	ko01110//Biosynthesis of secondary metabolites;ko00904//Diterpenoid biosynthesis	Global and overview maps;Metabolism of terpenoids and polyketides	Metabolism
Com_1161_pos	2.37729e+07	2.32453e+07	8.609e+07	1.04161e+08	2.35091e+07	9.51255e+07	2.01661	0.0155606	0.0631069	1.21533	Prostaglandin E2-1-glyceryl ester	--	C23 H38 O7	7.41	409.255	--	--	--	-	-	-	-
Com_428_pos	2.0915e+07	2.45584e+07	9.57172e+07	8.66239e+07	2.27367e+07	9.11705e+07	2.00355	0.00508372	0.0425866	1.19259	Quercetin	--	C15 H10 O7	5.41	303.049	Flavonoids	117-39-5	HMDB0005794	C00389	ko01100//Metabolic pathways;ko01110//Biosynthesis of secondary metabolites;ko00941//Flavonoid biosynthesis;ko00944//Flavone and flavonol biosynthesis	Biosynthesis of other secondary metabolites;Global and overview maps	Metabolism
Com_321_pos	4.00644e+07	4.13825e+07	1.18437e+08	9.90505e+07	4.07234e+07	1.08744e+08	1.417	0.0197971	0.0722593	1.17963	Kaempferol	--	C15 H10 O6	5.506	287.055	Flavonoids	520-18-3	HMDB0005801	C05903	ko01100//Metabolic pathways;ko01110//Biosynthesis of secondary metabolites;ko00941//Flavonoid biosynthesis;ko00944//Flavone and flavonol biosynthesis	Biosynthesis of other secondary metabolites;Global and overview maps	Metabolism
Com_1131_pos	3.16549e+07	2.93751e+07	9.53912e+07	9.6685e+07	3.0515e+07	9.60381e+07	1.65409	0.000399892	0.0317617	1.17054	4-Hydroxybenzaldehyde	--	C7 H6 O2	4.75	123.044	Organooxygen compounds	123-08-0	HMDB0011718	C00633	ko01100//Metabolic pathways;ko01120//Microbial metabolism in diverse environments	Global and overview maps	Metabolism
Com_596_pos	8.18387e+07	8.46187e+07	1.61729e+08	1.37593e+08	8.32287e+07	1.49661e+08	0.846547	0.0318488	0.0937098	1.15822	WMH	--	C22 H28 N6 O4 S	5.483	473.199	--	--	--	-	-	-	-
Com_1120_pos	9.90852e+07	9.60428e+07	3.17222e+07	3.70346e+07	9.7564e+07	3.43784e+07	-1.50485	0.00233859	0.0363499	1.14773	DGTS (2:0/10:0)	--	C22 H41 N O7	5.617	432.295	--	--	--	-	-	-	-
Com_429_pos	1.97888e+08	1.99678e+08	2.67432e+08	2.57068e+08	1.98783e+08	2.6225e+08	0.399751	0.00679496	0.0468761	1.14746	Palmitic Acid	--	C16 H32 O2	6.229	274.274	Fatty Acyls	57-10-3	HMDB0000220	C00249	ko01100//Metabolic pathways;ko01040//Biosynthesis of unsaturated fatty acids;ko00073//Cutin, suberine and wax biosynthesis;ko00061//Fatty acid biosynthesis;ko00071//Fatty acid degradation;ko00062//Fatty acid elongation;ko01212//Fatty acid metabolism	Global and overview maps;Lipid metabolism	Metabolism
Com_778_pos	1.51948e+08	1.40259e+08	8.52481e+07	7.99548e+07	1.46104e+08	8.26014e+07	-0.822753	0.0100537	0.052003	1.14644	1-(3,4-dimethoxyphenyl)ethan-1-one oxime	--	C10 H13 N O3	4.707	196.097	--	--	--	-	-	-	-
Com_548_pos	1.63323e+08	1.57199e+08	9.65391e+07	1.01495e+08	1.60261e+08	9.90171e+07	-0.694675	0.00411139	0.03964	1.12883	Testosterone	--	C19 H28 O2	7.252	289.216	Steroids and steroid derivatives	651-45-6	HMDB0002833	C00535	ko01100//Metabolic pathways;ko01120//Microbial metabolism in diverse environments	Global and overview maps	Metabolism
Com_890_pos	7.27374e+07	7.51756e+07	1.44756e+08	1.26038e+08	7.39565e+07	1.35397e+08	0.872448	0.0227935	0.0784342	1.11929	3-Methoxy prostaglandin F1伪	--	C21 H38 O6	7.093	391.245	--	--	--	-	-	-	-
Com_1531_pos	1.50626e+07	1.20876e+07	7.74922e+07	6.72842e+07	1.35751e+07	7.23882e+07	2.41479	0.0080722	0.0493131	1.10404	D-(-)-Quinic acid	--	C7 H12 O6	1.386	193.071	--	--	--	-	-	-	-
Com_764_pos	1.38233e+08	1.33237e+08	8.03709e+07	7.54966e+07	1.35735e+08	7.79338e+07	-0.800472	0.00362638	0.0389366	1.09756	Isophorone	--	C9 H14 O	6.869	139.111	Carbonyl compounds	78-59-1	HMDB0031195	-	-	-	-
Com_840_pos	1.30241e+08	1.17027e+08	6.74494e+07	6.33908e+07	1.23634e+08	6.54201e+07	-0.918274	0.0138045	0.0597807	1.09543	--	6-Paradol	C17 H26 O3	6.062	279.195	Benzene and substituted derivatives	27113-22-0	HMDB0030801	-	-	-	-
Com_604_pos	1.53329e+08	1.52062e+08	1.02414e+08	9.3823e+07	1.52696e+08	9.81185e+07	-0.638063	0.00626978	0.0466691	1.06552	Methyl dihydrojasmonate	--	C13 H22 O3	6.129	245.174	Fatty Acyls	24851-98-7	HMDB0031740	-	-	-	-
Com_592_pos	1.29718e+08	1.41586e+08	8.18393e+07	8.21828e+07	1.35652e+08	8.20111e+07	-0.72602	0.0120268	0.0541715	1.05329	Avocadyne 1-acetate	--	C19 H34 O4	7.149	309.242	Fatty Acyls	24607-06-5	HMDB0031048	-	-	-	-
Com_1793_pos	9.94542e+06	8.55156e+06	6.48117e+07	6.00272e+07	9.24849e+06	6.24195e+07	2.75471	0.00218885	0.0363499	1.05309	--	Momordin Ic	C41 H64 O13	8.637	765.438	--	--	--	-	-	-	-
Com_977_pos	1.14104e+08	1.11021e+08	6.8891e+07	4.99993e+07	1.12563e+08	5.94451e+07	-0.921096	0.0309657	0.0925699	1.03865	Nor-9-carboxy-未9-THC	--	C21 H28 O4	7.928	345.203	--	--	--	-	-	-	-
Com_913_pos	4.32047e+07	4.12351e+07	9.11005e+07	9.63286e+07	4.22199e+07	9.37146e+07	1.15035	0.00292984	0.0363499	1.03668	Phenmetrazine	--	C11 H15 N O	4.894	178.123	Oxazinanes	134-49-6	HMDB0014968	-	-	-	-
Com_775_pos	1.52354e+08	1.37688e+08	9.54354e+07	9.21065e+07	1.45021e+08	9.37709e+07	-0.629045	0.0208566	0.0747911	1.02397	Leucylproline	--	C11 H20 N2 O3	5.044	229.155	Carboxylic acids and derivatives	-	HMDB0011175	-	-	-	-
Com_863_pos	1.32915e+08	1.26153e+08	8.25493e+07	7.61385e+07	1.29534e+08	7.93439e+07	-0.707139	0.00850583	0.0493131	1.02028	Aurantio-obtusin 尾-D-glucoside	--	C23 H24 O12	5.665	493.133	--	--	--	-	-	-	-
Com_1509_pos	2.82102e+07	2.70207e+07	7.92408e+07	7.52684e+07	2.76155e+07	7.72546e+07	1.48414	0.00174003	0.0355662	1.01778	Prunin	--	C21 H22 O10	5.734	435.125	--	--	--	C09099	ko00941//Flavonoid biosynthesis	Biosynthesis of other secondary metabolites	Metabolism
Com_801_pos	6.75013e+07	7.20176e+07	1.15954e+08	1.21248e+08	6.97594e+07	1.18601e+08	0.765658	0.0050367	0.0425866	1.00828	1-adamantyl(1,4-thiazinan-4-yl)methanone	--	C15 H23 N O S	1.245	266.159	--	--	--	-	-	-	-
Com_2001_pos	5.08671e+07	4.74515e+07	1.0285e+06	1.04175e+06	4.91593e+07	1.03512e+06	-5.56959	0.00125699	0.0346581	1.00242	--	Neotuberostemonine	C22 H33 N O4	8.328	376.246	--	--	--	-	-	-	-

## Sheet: POS_CK-T4
index	CK-1	CK-2	T4-1	T4-2	control_mean	case_mean	log2_FC(case_mean/control_mean)	Pvalue	fdr	vip	MS2_name	MS1_name	formula	rtmin	mz	Class	CAS	HMDB	C_ID	Pathway	KEGG_B_class	KEGG_A_class
Com_3_pos	1.26395e+10	1.11788e+10	1.5812e+10	1.6506e+10	1.19092e+10	1.6159e+10	0.440263	0.0343474	0.111086	10.8592	Oleamide	--	C18 H35 N O	9.924	282.278	Fatty Acyls	301-02-0	HMDB0002117	-	-	-	-
Com_31_pos	1.46973e+09	1.40417e+09	4.97292e+09	5.16158e+09	1.43695e+09	5.06725e+09	1.8182	0.000755819	0.0280937	10.2044	PC (16:2e/2:0)	--	C26 H50 N O7 P	8.796	520.339	--	--	--	-	-	-	-
Com_39_pos	1.30556e+09	1.25406e+09	2.82881e+09	2.86905e+09	1.27981e+09	2.84893e+09	1.15449	0.000433386	0.0277635	6.70799	--	Pheophorbide A	C35 H36 N4 O5	10.514	593.275	--	--	--	C18021	ko01110//Biosynthesis of secondary metabolites;ko00860//Porphyrin and chlorophyll metabolism	Global and overview maps;Metabolism of cofactors and vitamins	Metabolism
Com_28_pos	4.89612e+09	4.74005e+09	3.39057e+09	3.54295e+09	4.81809e+09	3.46676e+09	-0.474873	0.0064503	0.0537016	6.19954	LPC 16:2	--	C24 H46 N O7 P	5.292	492.316	--	--	--	-	-	-	-
Com_59_pos	7.8067e+08	7.69208e+08	2.08306e+09	2.06655e+09	7.74939e+08	2.0748e+09	1.42082	5.97509e-05	0.0277635	6.10449	--	MAG (18:3)	C21 H36 O4	8.074	353.268	--	--	--	-	-	-	-
Com_55_pos	1.00437e+09	1.03169e+09	1.96083e+09	2.22745e+09	1.01803e+09	2.09414e+09	1.04058	0.0151567	0.0739043	5.52658	--	Denin	C33 H56 O14	8.075	677.371	--	--	--	-	-	-	-
Com_69_pos	2.0873e+09	1.95482e+09	9.93825e+08	1.11045e+09	2.02106e+09	1.05214e+09	-0.941785	0.00819381	0.059596	5.24476	9-Oxo-ODE	--	C18 H30 O3	7.827	295.226	Fatty Acyls	-	HMDB0004669	C14766	ko00591//Linoleic acid metabolism	Lipid metabolism	Metabolism
Com_22_pos	2.02661e+09	1.79646e+09	2.78336e+09	2.97709e+09	1.91153e+09	2.88022e+09	0.591452	0.0232718	0.0904865	5.21699	Indole-3-acrylic acid	--	C11 H9 N O2	5.088	188.07	--	--	--	-	-	-	-
Com_23_pos	1.99566e+09	1.76032e+09	2.74744e+09	2.92992e+09	1.87799e+09	2.83868e+09	0.596033	0.0231909	0.0904865	5.19504	DL-Tryptophan	--	C11 H12 N2 O2	5.087	205.097	Indoles and derivatives	54-12-6	HMDB0030396	-	-	-	-
Com_66_pos	1.03415e+09	9.60314e+08	1.72681e+09	1.85974e+09	9.97233e+08	1.79328e+09	0.846595	0.0089994	0.0598744	4.76339	Hexadecanamide	--	C16 H33 N O	9.701	256.263	Fatty Acyls	629-54-9	HMDB0012273	-	-	-	-
Com_41_pos	3.3568e+09	3.15811e+09	3.84087e+09	3.96491e+09	3.25745e+09	3.90289e+09	0.260796	0.0313818	0.107521	4.23989	Proline	--	C5 H9 N O2	1.367	116.07	Carboxylic acids and derivatives	344-25-2	HMDB0003411	-	-	-	-
Com_42_pos	1.93853e+09	1.79359e+09	2.49408e+09	2.46998e+09	1.86606e+09	2.48203e+09	0.411526	0.0139273	0.0739043	4.17024	--	Cinnamic Acid	C9 H8 O2	4.829	149.06	Cinnamic acids and derivatives	621-82-9	HMDB0000567	-	-	-	-
Com_44_pos	1.92223e+09	1.77959e+09	2.47316e+09	2.44566e+09	1.85091e+09	2.45941e+09	0.410075	0.0139495	0.0739043	4.14458	L-Phenylalanine	--	C9 H11 N O2	4.829	166.086	Carboxylic acids and derivatives	63-91-2	HMDB0000159	C00079	ko01100//Metabolic pathways;ko01110//Biosynthesis of secondary metabolites;ko01130//Biosynthesis of antibiotics;ko01230//Biosynthesis of amino acids;ko02010//ABC transporters;ko00940//Phenylpropanoid biosynthesis;ko00360//Phenylalanine metabolism;ko01210//2-Oxocarboxylic acid metabolism;ko00970//Aminoacyl-tRNA biosynthesis;ko00960//Tropane, piperidine and pyridine alkaloid biosynthesis;ko00400//P…	Amino acid metabolism;Biosynthesis of other secondary metabolites;Global and overview maps;Membrane transport;Metabolism of other amino acids;Translation	Environmental Information Processing;Genetic Information Processing;Metabolism
Com_35_pos	3.72842e+09	3.61818e+09	4.13196e+09	4.13716e+09	3.6733e+09	4.13456e+09	0.170657	0.014012	0.0739043	3.61033	Choline	--	C5 H13 N O	1.29	104.107	Organonitrogen compounds	62-49-7	HMDB0000097	C00114	ko01100//Metabolic pathways;ko02010//ABC transporters;ko00260//Glycine, serine and threonine metabolism;ko00564//Glycerophospholipid metabolism	Amino acid metabolism;Global and overview maps;Lipid metabolism;Membrane transport	Environmental Information Processing;Metabolism
Com_77_pos	1.3094e+09	1.30087e+09	1.78185e+09	1.72625e+09	1.30513e+09	1.75405e+09	0.426495	0.00390237	0.0463747	3.57659	Bicyclo prostaglandin E2	--	C20 H30 O4	7.898	335.218	--	--	--	-	-	-	-
Com_171_pos	7.71831e+08	7.44147e+08	3.07614e+08	3.3539e+08	7.57989e+08	3.21502e+08	-1.23735	0.00201196	0.0395427	3.53266	Octadecanedioic acid	--	C18 H34 O4	8.358	315.252	Fatty Acyls	871-70-5	HMDB0000782	-	-	-	-
Com_168_pos	3.89159e+08	4.46122e+08	8.08003e+08	8.19596e+08	4.17641e+08	8.138e+08	0.962411	0.00533978	0.0508094	3.36342	L-Glutamic acid	--	C5 H9 N O4	1.31	148.06	Carboxylic acids and derivatives	-	HMDB0060475	C00025	ko01100//Metabolic pathways;ko01110//Biosynthesis of secondary metabolites;ko01120//Microbial metabolism in diverse environments;ko01130//Biosynthesis of antibiotics;ko01230//Biosynthesis of amino acids;ko02010//ABC transporters;ko01200//Carbon metabolism;ko01210//2-Oxocarboxylic acid metabolism;ko00250//Alanine, aspartate and glutamate metabolism;ko00970//Aminoacyl-tRNA biosynthesis;ko00220//Arg…	Amino acid metabolism;Biosynthesis of other secondary metabolites;Carbohydrate metabolism;Energy metabolism;Global and overview maps;Membrane transport;Metabolism of cofactors and vitamins;Metabolism of other amino acids;Translation	Environmental Information Processing;Genetic Information Processing;Metabolism
Com_53_pos	1.80686e+09	1.85155e+09	1.46683e+09	1.41743e+09	1.8292e+09	1.44213e+09	-0.343014	0.00732421	0.05714	3.32297	伪-Linolenic acid	--	C18 H30 O2	9.588	279.231	--	--	--	-	-	-	-
Com_209_pos	5.97556e+08	5.89473e+08	2.16605e+08	2.1677e+08	5.93515e+08	2.16687e+08	-1.45367	0.000115081	0.0277635	3.28727	(+/-)12(13)-DiHOME	--	C18 H34 O4	8.436	297.242	--	--	--	-	-	-	-
Com_33_pos	3.21655e+09	3.22613e+09	3.57677e+09	3.62017e+09	3.22134e+09	3.59847e+09	0.159722	0.00345497	0.0446542	3.28681	5伪-Dihydrotestosterone	--	C19 H30 O2	8.256	291.231	--	--	--	-	-	-	-
Com_232_pos	1.23923e+08	1.19846e+08	4.85322e+08	5.02881e+08	1.21885e+08	4.94101e+08	2.01929	0.000585822	0.0280937	3.26766	LPC 18:3	--	C26 H48 N O7 P	8.491	518.323	--	--	--	-	-	-	-
Com_152_pos	9.22424e+08	9.07217e+08	5.79998e+08	6.10977e+08	9.14821e+08	5.95487e+08	-0.619418	0.002907	0.0443244	3.01918	--	9-Hydroxy-(10E,12Z,15Z)-Octadecatrienoic Acid	C18 H30 O3	6.774	295.226	--	--	--	-	-	-	-
Com_18_pos	5.44946e+09	5.46362e+09	5.81807e+09	5.70503e+09	5.45654e+09	5.76155e+09	0.0784707	0.0331528	0.108765	2.89781	伪-Eleostearic acid	--	C18 H30 O2	7.939	279.231	--	--	--	-	-	-	-
Com_95_pos	2.39168e+08	2.11123e+08	4.60231e+08	5.64804e+08	2.25145e+08	5.12517e+08	1.18674	0.0337021	0.110043	2.83152	Oleoyl ethylamide	--	C20 H39 N O	10.768	310.31	--	--	--	-	-	-	-
Com_336_pos	1.17341e+08	1.16439e+08	3.67009e+08	3.79531e+08	1.1689e+08	3.7327e+08	1.67506	0.000598871	0.0280937	2.71201	LPE 18:3	--	C23 H42 N O7 P	8.306	476.277	--	--	--	-	-	-	-
Com_347_pos	3.37679e+08	2.91094e+08	7.99757e+07	8.68167e+07	3.14387e+08	8.33962e+07	-1.91449	0.0102285	0.0626594	2.56076	Isoliensinine	--	C37 H42 N2 O6	6.248	611.303	Isoquinolines and derivatives	6817-41-0	HMDB0033749	-	-	-	-
Com_229_pos	3.16282e+08	2.73385e+08	5.12982e+08	5.10762e+08	2.94834e+08	5.11872e+08	0.795882	0.00965106	0.0624265	2.48165	Reserpine	--	C33 H40 N2 O9	9.911	609.269	Yohimbine alkaloids	50-55-5	HMDB0014351	-	-	-	-
Com_296_pos	3.97747e+08	3.12098e+08	1.23434e+08	1.61605e+08	3.54923e+08	1.42519e+08	-1.31635	0.0454292	0.129484	2.40883	VLH	--	C17 H29 N5 O4	5.623	373.184	--	--	--	-	-	-	-
Com_375_pos	9.17474e+07	8.782e+07	2.93346e+08	2.77456e+08	8.97837e+07	2.85401e+08	1.66846	0.00174574	0.0373093	2.36449	Acetophenone	--	C8 H8 O	2.457	121.065	Organooxygen compounds	98-86-2	HMDB0033910	C07113	ko01120//Microbial metabolism in diverse environments;ko01220//Degradation of aromatic compounds	Global and overview maps	Metabolism
Com_350_pos	3.33667e+08	3.15189e+08	1.76936e+08	1.6707e+08	3.24428e+08	1.72003e+08	-0.915463	0.00468833	0.0488925	2.08761	1,4-dihydroxyheptadec-16-en-2-yl acetate	--	C19 H36 O4	8.27	311.258	--	--	--	-	-	-	-
Com_394_pos	3.01348e+08	2.81646e+08	1.40471e+08	1.40426e+08	2.91497e+08	1.40449e+08	-1.05344	0.00422658	0.0474677	2.07737	Jasmone	--	C11 H16 O	6.239	165.127	Organooxygen compounds	488-10-8	HMDB0035601	-	-	-	-
Com_252_pos	4.97182e+08	4.64261e+08	3.44349e+08	3.32893e+08	4.80721e+08	3.38621e+08	-0.505529	0.0147123	0.0739043	2.0062	N-[2-chloro-6-(trifluoromethoxy)phenyl]-2,2-dimethylpropanamide	--	C12 H13 Cl F3 N O2	1.243	296.065	--	--	--	-	-	-	-
Com_436_pos	6.02766e+07	5.51627e+07	1.82162e+08	1.99051e+08	5.77197e+07	1.90606e+08	1.72346	0.00437921	0.0478377	1.95017	--	DGMG (18:2)	C33 H58 O14	8.559	679.39	--	--	--	-	-	-	-
Com_325_pos	3.43418e+08	3.42012e+08	2.22827e+08	2.25382e+08	3.42715e+08	2.24104e+08	-0.61284	0.000151074	0.0277635	1.84383	(11E,15Z)-9,10,13-trihydroxyoctadeca-11,15-dienoic acid	--	C18 H32 O5	6.766	329.232	--	--	--	-	-	-	-
Com_596_pos	8.18387e+07	8.46187e+07	1.71114e+08	2.10015e+08	8.32287e+07	1.90564e+08	1.19512	0.0314569	0.107521	1.73285	WMH	--	C22 H28 N6 O4 S	5.483	473.199	--	--	--	-	-	-	-
Com_545_pos	1.27133e+08	1.18771e+08	2.26266e+08	2.26185e+08	1.22952e+08	2.26226e+08	0.87967	0.00163503	0.0373093	1.71929	Pyridoxine	--	C8 H11 N O3	4.937	170.081	Pyridines and derivatives	65-23-6	HMDB0000239	C00314	ko01100//Metabolic pathways;ko01120//Microbial metabolism in diverse environments;ko00750//Vitamin B6 metabolism	Global and overview maps;Metabolism of cofactors and vitamins	Metabolism
Com_872_pos	1.19187e+08	1.24715e+08	2.0333e+07	1.96346e+07	1.21951e+08	1.99838e+07	-2.60939	0.00074577	0.0280937	1.70934	Ajugol	--	C15 H24 O9	5.669	371.13	--	--	--	-	-	-	-
Com_1073_pos	1.0148e+08	1.00373e+08	650387	899286	1.00927e+08	774837	-7.0252	3.20326e-05	0.0277635	1.69471	Stercobilin	--	C33 H46 N4 O6	5.519	595.348	Tetrapyrroles and derivatives	-	HMDB0240259	C05793	ko00860//Porphyrin and chlorophyll metabolism	Metabolism of cofactors and vitamins	Metabolism
Com_913_pos	4.32047e+07	4.12351e+07	1.37091e+08	1.37617e+08	4.22199e+07	1.37354e+08	1.7019	0.000114791	0.0277635	1.65168	Phenmetrazine	--	C11 H15 N O	4.894	178.123	Oxazinanes	134-49-6	HMDB0014968	-	-	-	-
Com_292_pos	2.28046e+08	2.2649e+08	3.35529e+08	3.03876e+08	2.27268e+08	3.19703e+08	0.492335	0.028152	0.10269	1.59964	PC (14:0e/2:0)	--	C24 H50 N O7 P	9.131	496.339	--	--	--	-	-	-	-
Com_708_pos	1.67873e+08	1.34384e+08	6.0618e+07	5.82875e+07	1.51129e+08	5.94528e+07	-1.34596	0.0319247	0.108037	1.59678	--	5-oxoproline	C5 H7 N O3	1.697	130.05	Carboxylic acids and derivatives	-	HMDB0060262	C01879	ko01100//Metabolic pathways;ko00480//Glutathione metabolism	Global and overview maps;Metabolism of other amino acids	Metabolism
Com_345_pos	1.09466e+08	9.16862e+07	1.8289e+08	1.91294e+08	1.00576e+08	1.87092e+08	0.895459	0.0126725	0.0711612	1.56605	Glu-Val-Phe	--	C19 H27 N3 O6	5.339	394.208	--	--	--	-	-	-	-
Com_226_pos	4.91379e+08	4.53867e+08	5.62859e+08	5.54998e+08	4.72623e+08	5.58929e+08	0.241975	0.0459328	0.129898	1.53413	4-oxododecanedioic acid	--	C12 H20 O5	5.758	227.125	--	--	--	-	-	-	-
Com_211_pos	3.14927e+08	2.80612e+08	3.79757e+08	3.79582e+08	2.97769e+08	3.79669e+08	0.350549	0.0411962	0.119609	1.49951	Pantothenic acid	--	C9 H17 N O5	4.963	220.118	Alcohols and polyols	79-83-4	HMDB0000210	C00864	ko01100//Metabolic pathways;ko01110//Biosynthesis of secondary metabolites;ko00410//beta-Alanine metabolism;ko00770//Pantothenate and CoA biosynthesis	Global and overview maps;Metabolism of cofactors and vitamins;Metabolism of other amino acids	Metabolism
Com_1120_pos	9.90852e+07	9.60428e+07	2.12075e+07	2.19593e+07	9.7564e+07	2.15834e+07	-2.17643	0.000425041	0.0277635	1.47578	DGTS (2:0/10:0)	--	C22 H41 N O7	5.617	432.295	--	--	--	-	-	-	-
Com_485_pos	1.12042e+08	1.24874e+08	1.90908e+08	1.95997e+08	1.18458e+08	1.93452e+08	0.707603	0.00836387	0.059596	1.46179	5-(6-hydroxy-6-methyloctyl)-2,5-dihydrofuran-2-one	--	C13 H22 O3	5.597	209.153	--	--	--	-	-	-	-
Com_1085_pos	8.79308e+07	9.95066e+07	1.98099e+07	2.03498e+07	9.37187e+07	2.00799e+07	-2.22259	0.00613427	0.0525314	1.44824	--	Ferruginol	C20 H30 O	6.195	287.236	--	--	--	C09092	ko01110//Biosynthesis of secondary metabolites;ko00904//Diterpenoid biosynthesis	Global and overview maps;Metabolism of terpenoids and polyketides	Metabolism
Com_309_pos	2.45999e+08	2.28919e+08	1.62083e+08	1.73231e+08	2.37459e+08	1.67657e+08	-0.502167	0.0206855	0.0864585	1.39856	Nicotinamide	--	C6 H6 N2 O	1.926	123.055	Pyridines and derivatives	98-92-0	HMDB0001406	C00153	ko01100//Metabolic pathways;ko00760//Nicotinate and nicotinamide metabolism	Global and overview maps;Metabolism of cofactors and vitamins	Metabolism
Com_558_pos	1.00234e+08	8.5584e+07	1.55941e+08	1.62596e+08	9.29089e+07	1.59269e+08	0.777575	0.014382	0.0739043	1.37037	2-Hydroxycinnamic acid	--	C9 H8 O3	5.209	165.054	Cinnamic acids and derivatives	-	HMDB0134028	C01772	ko01110//Biosynthesis of secondary metabolites;ko01120//Microbial metabolism in diverse environments;ko00940//Phenylpropanoid biosynthesis;ko00360//Phenylalanine metabolism	Amino acid metabolism;Biosynthesis of other secondary metabolites;Global and overview maps	Metabolism
Com_657_pos	1.69888e+08	1.67204e+08	1.04046e+08	1.04182e+08	1.68546e+08	1.04114e+08	-0.694979	0.000434653	0.0277635	1.35911	3-hydroxy-2-octylpentanedioic acid	--	C13 H24 O5	6.241	243.159	--	--	--	-	-	-	-
Com_586_pos	9.64717e+07	8.20359e+07	1.4589e+08	1.53284e+08	8.92538e+07	1.49587e+08	0.745	0.0175925	0.079909	1.30477	Coumarin	--	C9 H6 O2	5.324	147.044	Coumarins and derivatives	91-64-5	HMDB0001218	C05851	ko01110//Biosynthesis of secondary metabolites;ko00940//Phenylpropanoid biosynthesis	Biosynthesis of other secondary metabolites;Global and overview maps	Metabolism
Com_470_pos	2.31721e+08	2.27016e+08	1.66955e+08	1.75397e+08	2.29368e+08	1.71176e+08	-0.422184	0.00682462	0.0553553	1.28578	Idebenone	--	C19 H30 O5	6.15	339.216	--	--	--	-	-	-	-
Com_775_pos	1.52354e+08	1.37688e+08	9.00735e+07	8.80076e+07	1.45021e+08	8.90406e+07	-0.703723	0.0170533	0.0785067	1.25723	Leucylproline	--	C11 H20 N2 O3	5.044	229.155	Carboxylic acids and derivatives	-	HMDB0011175	-	-	-	-
Com_1131_pos	3.16549e+07	2.93751e+07	7.64464e+07	9.29407e+07	3.0515e+07	8.46935e+07	1.47273	0.0228094	0.0901326	1.23576	4-Hydroxybenzaldehyde	--	C7 H6 O2	4.75	123.044	Organooxygen compounds	123-08-0	HMDB0011718	C00633	ko01100//Metabolic pathways;ko01120//Microbial metabolism in diverse environments	Global and overview maps	Metabolism
Com_801_pos	6.75013e+07	7.20176e+07	1.18337e+08	1.23847e+08	6.97594e+07	1.21092e+08	0.795643	0.00478051	0.0493503	1.21186	1-adamantyl(1,4-thiazinan-4-yl)methanone	--	C15 H23 N O S	1.245	266.159	--	--	--	-	-	-	-
Com_1737_pos	6.01667e+07	5.57877e+07	9.77263e+06	8.83903e+06	5.79772e+07	9.30583e+06	-2.63928	0.00210904	0.0406686	1.1806	2-{[(4,5-dimethoxy-2-nitrophenethyl)imino]methyl}phenol	--	C17 H18 N2 O5	5.669	331.138	--	--	--	-	-	-	-
Com_1581_pos	6.6914e+07	6.25061e+07	1.02261e+07	2.04507e+07	6.471e+07	1.53384e+07	-2.07684	0.0124773	0.0705118	1.18025	(9cis)-Retinal	--	C20 H28 O	5.884	285.221	--	--	--	-	-	-	-
Com_2001_pos	5.08671e+07	4.74515e+07	7.04419e+06	7.43041e+06	4.91593e+07	7.2373e+06	-2.76394	0.00167653	0.0373093	1.09561	--	Neotuberostemonine	C22 H33 N O4	8.328	376.246	--	--	--	-	-	-	-
Com_1808_pos	2.11937e+07	1.76201e+07	6.3853e+07	5.86473e+07	1.94069e+07	6.12502e+07	1.65815	0.00564481	0.0514342	1.09085	Convallatoxin	--	C29 H42 O10	8.395	551.282	Steroids and steroid derivatives	5822-57-1	HMDB0034362	-	-	-	-
Com_430_pos	2.3613e+08	2.45449e+08	2.01954e+08	1.98273e+08	2.40789e+08	2.00113e+08	-0.266955	0.0148331	0.0739043	1.07252	Lofepramine	--	C26 H27 Cl N2 O	5.52	441.173	Benzazepines	50-49-7	HMDB0001848	-	-	-	-
Com_193_pos	4.84511e+08	4.79617e+08	4.36214e+08	4.47026e+08	4.82064e+08	4.4162e+08	-0.126418	0.0208543	0.0866386	1.06311	1,2-dihydroxyheptadec-16-yn-4-yl acetate	--	C19 H34 O4	7.807	349.234	--	--	--	-	-	-	-
Com_1671_pos	1.24076e+07	1.13044e+07	5.08531e+07	5.12985e+07	1.1856e+07	5.10758e+07	2.10702	0.000229992	0.0277635	1.06048	Linarin	--	C28 H32 O14	5.077	593.197	--	--	--	-	-	-	-
Com_429_pos	1.97888e+08	1.99678e+08	2.33547e+08	2.43145e+08	1.98783e+08	2.38346e+08	0.261866	0.014885	0.0739043	1.05981	Palmitic Acid	--	C16 H32 O2	6.229	274.274	Fatty Acyls	57-10-3	HMDB0000220	C00249	ko01100//Metabolic pathways;ko01040//Biosynthesis of unsaturated fatty acids;ko00073//Cutin, suberine and wax biosynthesis;ko00061//Fatty acid biosynthesis;ko00071//Fatty acid degradation;ko00062//Fatty acid elongation;ko01212//Fatty acid metabolism	Global and overview maps;Lipid metabolism	Metabolism
Com_718_pos	8.50078e+07	8.20679e+07	1.15541e+08	1.31977e+08	8.35378e+07	1.23759e+08	0.567033	0.0404823	0.118525	1.0561	Propionylcarnitine	--	C10 H19 N O4	2.305	218.138	Fatty Acyls	17298-37-2	HMDB0000824	-	-	-	-
Com_452_pos	2.29937e+08	2.22422e+08	1.86641e+08	1.8726e+08	2.26179e+08	1.86951e+08	-0.27481	0.00911153	0.0598744	1.05601	PE (3:0/16:1)	--	C24 H46 N O8 P	5.264	508.311	--	--	--	-	-	-	-
Com_2056_pos	1.42035e+07	1.50799e+07	5.41367e+07	5.20096e+07	1.46417e+07	5.30732e+07	1.8579	0.00089466	0.0280937	1.04883	PC (2:0/16:2)	--	C26 H48 N O8 P	6.737	534.32	--	--	--	-	-	-	-
Com_1793_pos	9.94542e+06	8.55156e+06	4.59022e+07	4.8775e+07	9.24849e+06	4.73386e+07	2.35573	0.0017523	0.0373093	1.04494	--	Momordin Ic	C41 H64 O13	8.637	765.438	--	--	--	-	-	-	-
Com_1751_pos	5.9745e+07	4.88756e+07	1.62082e+07	1.68511e+07	5.43103e+07	1.65296e+07	-1.71617	0.0201397	0.0853415	1.03072	--	7-O-Ethylmorroniside	C19 H30 O11	5.439	435.184	--	--	--	-	-	-	-
Com_222_pos	5.56815e+08	5.56219e+08	5.16953e+08	5.22887e+08	5.56517e+08	5.1992e+08	-0.0981356	0.00657275	0.0541722	1.0195	Enalaprilat	--	C18 H24 N2 O5	6.883	349.177	Carboxylic acids and derivatives	76420-72-9	HMDB0041886	-	-	-	-

## Sheet: POS_CK-T5
index	CK-1	CK-2	T5-1	T5-2	control_mean	case_mean	log2_FC(case_mean/control_mean)	Pvalue	fdr	vip	MS2_name	MS1_name	formula	rtmin	mz	Class	CAS	HMDB	C_ID	Pathway	KEGG_B_class	KEGG_A_class
Com_28_pos	4.89612e+09	4.74005e+09	1.88746e+09	1.9477e+09	4.81809e+09	1.91758e+09	-1.32917	0.000830567	0.0202105	9.26555	LPC 16:2	--	C24 H46 N O7 P	5.292	492.316	--	--	--	-	-	-	-
Com_41_pos	3.3568e+09	3.15811e+09	8.04076e+08	8.3292e+08	3.25745e+09	8.18498e+08	-1.99269	0.00168972	0.0248464	8.49287	Proline	--	C5 H9 N O2	1.367	116.07	Carboxylic acids and derivatives	344-25-2	HMDB0003411	-	-	-	-
Com_39_pos	1.30556e+09	1.25406e+09	2.64905e+09	2.73255e+09	1.27981e+09	2.6908e+09	1.07211	0.00120622	0.023707	6.46191	--	Pheophorbide A	C35 H36 N4 O5	10.514	593.275	--	--	--	C18021	ko01110//Biosynthesis of secondary metabolites;ko00860//Porphyrin and chlorophyll metabolism	Global and overview maps;Metabolism of cofactors and vitamins	Metabolism
Com_31_pos	1.46973e+09	1.40417e+09	2.53117e+09	2.56589e+09	1.43695e+09	2.54853e+09	0.82666	0.00111171	0.0231871	5.73555	PC (16:2e/2:0)	--	C26 H50 N O7 P	8.796	520.339	--	--	--	-	-	-	-
Com_18_pos	5.44946e+09	5.46362e+09	4.32428e+09	4.36695e+09	5.45654e+09	4.34561e+09	-0.328427	0.000409292	0.0160883	5.73536	伪-Eleostearic acid	--	C18 H30 O2	7.939	279.231	--	--	--	-	-	-	-
Com_35_pos	3.72842e+09	3.61818e+09	4.60119e+09	4.47806e+09	3.6733e+09	4.53963e+09	0.305496	0.00897592	0.0480282	5.04236	Choline	--	C5 H13 N O	1.29	104.107	Organonitrogen compounds	62-49-7	HMDB0000097	C00114	ko01100//Metabolic pathways;ko02010//ABC transporters;ko00260//Glycine, serine and threonine metabolism;ko00564//Glycerophospholipid metabolism	Amino acid metabolism;Global and overview maps;Lipid metabolism;Membrane transport	Environmental Information Processing;Metabolism
Com_69_pos	2.0873e+09	1.95482e+09	1.2319e+09	1.24426e+09	2.02106e+09	1.23808e+09	-0.707002	0.00714175	0.0445053	4.79881	9-Oxo-ODE	--	C18 H30 O3	7.827	295.226	Fatty Acyls	-	HMDB0004669	C14766	ko00591//Linoleic acid metabolism	Lipid metabolism	Metabolism
Com_55_pos	1.00437e+09	1.03169e+09	1.67966e+09	1.63271e+09	1.01803e+09	1.65618e+09	0.702086	0.00180606	0.0248464	4.34368	--	Denin	C33 H56 O14	8.075	677.371	--	--	--	-	-	-	-
Com_72_pos	1.88668e+09	1.75978e+09	2.36959e+09	2.24115e+09	1.82323e+09	2.30537e+09	0.338497	0.0333204	0.0946497	3.71459	--	D-threo-Isocitric acid	C6 H8 O7	2.078	193.035	Carboxylic acids and derivatives	6061-97-8	HMDB0001874	-	-	-	-
Com_59_pos	7.8067e+08	7.69208e+08	1.18213e+09	1.23708e+09	7.74939e+08	1.2096e+09	0.642377	0.00414337	0.0349221	3.58156	--	MAG (18:3)	C21 H36 O4	8.074	353.268	--	--	--	-	-	-	-
Com_303_pos	1.24491e+07	1.24479e+07	4.20488e+08	4.30115e+08	1.24485e+07	4.25302e+08	5.09444	0.0001359	0.0159337	3.4971	Trifolin	--	C21 H20 O11	5.497	449.107	Flavonoids	23627-87-4	HMDB0030864	C12626	ko00944//Flavone and flavonol biosynthesis	Biosynthesis of other secondary metabolites	Metabolism
Com_321_pos	4.00644e+07	4.13825e+07	3.815e+08	4.10729e+08	4.07234e+07	3.96115e+08	3.28199	0.00169018	0.0248464	3.24234	Kaempferol	--	C15 H10 O6	5.506	287.055	Flavonoids	520-18-3	HMDB0005801	C05903	ko01100//Metabolic pathways;ko01110//Biosynthesis of secondary metabolites;ko00941//Flavonoid biosynthesis;ko00944//Flavone and flavonol biosynthesis	Biosynthesis of other secondary metabolites;Global and overview maps	Metabolism
Com_171_pos	7.71831e+08	7.44147e+08	3.74468e+08	4.29228e+08	7.57989e+08	4.01848e+08	-0.915527	0.00733954	0.0446914	3.23559	Octadecanedioic acid	--	C18 H34 O4	8.358	315.252	Fatty Acyls	871-70-5	HMDB0000782	-	-	-	-
Com_65_pos	2.19348e+08	1.83784e+08	5.28582e+08	4.97412e+08	2.01566e+08	5.12997e+08	1.3477	0.00571515	0.0418837	3.02838	Pipecolic acid	--	C6 H11 N O2	1.762	130.086	Carboxylic acids and derivatives	3105-95-1	HMDB0000716	C00408	ko01100//Metabolic pathways;ko01110//Biosynthesis of secondary metabolites;ko00960//Tropane, piperidine and pyridine alkaloid biosynthesis;ko00310//Lysine degradation	Amino acid metabolism;Biosynthesis of other secondary metabolites;Global and overview maps	Metabolism
Com_209_pos	5.97556e+08	5.89473e+08	2.87081e+08	2.84334e+08	5.93515e+08	2.85708e+08	-1.05474	0.000192294	0.0159337	3.01946	(+/-)12(13)-DiHOME	--	C18 H34 O4	8.436	297.242	--	--	--	-	-	-	-
Com_358_pos	3.30215e+08	3.06804e+08	3.56089e+07	3.70375e+07	3.18509e+08	3.63232e+07	-3.13237	0.0017227	0.0248464	2.8888	L-Pyroglutamic acid	--	C5 H7 N O3	2.179	130.05	Carboxylic acids and derivatives	98-79-3	HMDB0000267	C01879	ko01100//Metabolic pathways;ko00480//Glutathione metabolism	Global and overview maps;Metabolism of other amino acids	Metabolism
Com_152_pos	9.22424e+08	9.07217e+08	6.26006e+08	6.41402e+08	9.14821e+08	6.33704e+08	-0.529679	0.00147815	0.0247651	2.88349	--	9-Hydroxy-(10E,12Z,15Z)-Octadecatrienoic Acid	C18 H30 O3	6.774	295.226	--	--	--	-	-	-	-
Com_428_pos	2.0915e+07	2.45584e+07	2.9782e+08	3.074e+08	2.27367e+07	3.0261e+08	3.73437	0.00033511	0.0159471	2.87908	Quercetin	--	C15 H10 O7	5.41	303.049	Flavonoids	117-39-5	HMDB0005794	C00389	ko01100//Metabolic pathways;ko01110//Biosynthesis of secondary metabolites;ko00941//Flavonoid biosynthesis;ko00944//Flavone and flavonol biosynthesis	Biosynthesis of other secondary metabolites;Global and overview maps	Metabolism
Com_345_pos	1.09466e+08	9.16862e+07	3.40018e+08	3.78426e+08	1.00576e+08	3.59222e+08	1.83659	0.00662767	0.0431432	2.75943	Glu-Val-Phe	--	C19 H27 N3 O6	5.339	394.208	--	--	--	-	-	-	-
Com_296_pos	3.97747e+08	3.12098e+08	1.02803e+08	1.23029e+08	3.54923e+08	1.12916e+08	-1.65226	0.0315054	0.0915369	2.63475	VLH	--	C17 H29 N5 O4	5.623	373.184	--	--	--	-	-	-	-
Com_66_pos	1.03415e+09	9.60314e+08	1.24377e+09	1.17958e+09	9.97233e+08	1.21167e+09	0.280999	0.0482973	0.115565	2.45795	Hexadecanamide	--	C16 H33 N O	9.701	256.263	Fatty Acyls	629-54-9	HMDB0012273	-	-	-	-
Com_33_pos	3.21655e+09	3.22613e+09	3.00855e+09	3.03411e+09	3.22134e+09	3.02133e+09	-0.092479	0.00462542	0.0375173	2.42818	5伪-Dihydrotestosterone	--	C19 H30 O2	8.256	291.231	--	--	--	-	-	-	-
Com_193_pos	4.84511e+08	4.79617e+08	2.88033e+08	2.91302e+08	4.82064e+08	2.89667e+08	-0.734826	0.000233861	0.0159337	2.38707	1,2-dihydroxyheptadec-16-yn-4-yl acetate	--	C19 H34 O4	7.807	349.234	--	--	--	-	-	-	-
Com_95_pos	2.39168e+08	2.11123e+08	4.26236e+08	3.87505e+08	2.25145e+08	4.06871e+08	0.853715	0.0168732	0.0668388	2.29999	Oleoyl ethylamide	--	C20 H39 N O	10.768	310.31	--	--	--	-	-	-	-
Com_336_pos	1.17341e+08	1.16439e+08	2.86576e+08	2.68213e+08	1.1689e+08	2.77394e+08	1.24678	0.0032644	0.0338818	2.1767	LPE 18:3	--	C23 H42 N O7 P	8.306	476.277	--	--	--	-	-	-	-
Com_222_pos	5.56815e+08	5.56219e+08	4.07014e+08	3.921e+08	5.56517e+08	3.99557e+08	-0.478024	0.00225305	0.0276921	2.15419	Enalaprilat	--	C18 H24 N2 O5	6.883	349.177	Carboxylic acids and derivatives	76420-72-9	HMDB0041886	-	-	-	-
Com_350_pos	3.33667e+08	3.15189e+08	1.84241e+08	1.75077e+08	3.24428e+08	1.79659e+08	-0.852637	0.00503639	0.0389939	2.06586	1,4-dihydroxyheptadec-16-en-2-yl acetate	--	C19 H36 O4	8.27	311.258	--	--	--	-	-	-	-
Com_524_pos	2.2121e+08	1.99478e+08	6.91805e+07	6.54653e+07	2.10344e+08	6.73229e+07	-1.64358	0.00588844	0.0418837	2.05238	Allocryptopine	--	C21 H23 N O5	1.365	370.17	--	--	--	C02134	ko01110//Biosynthesis of secondary metabolites;ko00950//Isoquinoline alkaloid biosynthesis	Biosynthesis of other secondary metabolites;Global and overview maps	Metabolism
Com_708_pos	1.67873e+08	1.34384e+08	1.07818e+07	1.08863e+07	1.51129e+08	1.0834e+07	-3.80213	0.0139474	0.0611772	2.02439	--	5-oxoproline	C5 H7 N O3	1.697	130.05	Carboxylic acids and derivatives	-	HMDB0060262	C01879	ko01100//Metabolic pathways;ko00480//Glutathione metabolism	Global and overview maps;Metabolism of other amino acids	Metabolism
Com_196_pos	4.87337e+08	4.52679e+08	3.29668e+08	3.45627e+08	4.70008e+08	3.37648e+08	-0.477165	0.0201499	0.0729707	1.95982	(12Z)-9,10,11-trihydroxyoctadec-12-enoic acid	--	C18 H34 O5	6.294	353.229	--	--	--	-	-	-	-
Com_232_pos	1.23923e+08	1.19846e+08	2.78452e+08	2.32358e+08	1.21885e+08	2.55405e+08	1.06727	0.0287399	0.0853169	1.95921	LPC 18:3	--	C26 H48 N O7 P	8.491	518.323	--	--	--	-	-	-	-
Com_257_pos	2.20178e+08	2.15564e+08	3.3821e+08	3.42015e+08	2.17871e+08	3.40112e+08	0.642539	0.000597883	0.0189763	1.9025	LPE 18:2	--	C23 H44 N O7 P	8.813	478.292	--	--	--	-	-	-	-
Com_1011_pos	9.1747e+06	9.16762e+06	1.27267e+08	1.2792e+08	9.17116e+06	1.27593e+08	3.7983	7.59112e-06	0.00775813	1.87303	3',4'-Dihydroxyphenylacetone	--	C9 H10 O3	5.612	167.07	--	--	--	-	-	-	-
Com_211_pos	3.14927e+08	2.80612e+08	4.21262e+08	4.15812e+08	2.97769e+08	4.18537e+08	0.49116	0.0200724	0.0729707	1.87232	Pantothenic acid	--	C9 H17 N O5	4.963	220.118	Alcohols and polyols	79-83-4	HMDB0000210	C00864	ko01100//Metabolic pathways;ko01110//Biosynthesis of secondary metabolites;ko00410//beta-Alanine metabolism;ko00770//Pantothenate and CoA biosynthesis	Global and overview maps;Metabolism of cofactors and vitamins;Metabolism of other amino acids	Metabolism
Com_485_pos	1.12042e+08	1.24874e+08	2.548e+08	2.21121e+08	1.18458e+08	2.37961e+08	1.00635	0.0219915	0.0752999	1.86008	5-(6-hydroxy-6-methyloctyl)-2,5-dihydrofuran-2-one	--	C13 H22 O3	5.597	209.153	--	--	--	-	-	-	-
Com_452_pos	2.29937e+08	2.22422e+08	1.10967e+08	1.08525e+08	2.26179e+08	1.09746e+08	-1.0433	0.00114953	0.0234964	1.85621	PE (3:0/16:1)	--	C24 H46 N O8 P	5.264	508.311	--	--	--	-	-	-	-
Com_743_pos	5.65001e+07	5.93203e+07	1.82228e+08	1.63337e+08	5.79102e+07	1.72782e+08	1.57706	0.00684105	0.0436499	1.83803	2-({2-oxo-2-[(2-oxo-3-azepanyl)amino]ethyl}sulfanyl)acetic acid	--	C10 H16 N2 O4 S	2.334	261.094	--	--	--	-	-	-	-
Com_394_pos	3.01348e+08	2.81646e+08	1.78329e+08	1.76063e+08	2.91497e+08	1.77196e+08	-0.718135	0.0074424	0.0446914	1.83332	Jasmone	--	C11 H16 O	6.239	165.127	Organooxygen compounds	488-10-8	HMDB0035601	-	-	-	-
Com_325_pos	3.43418e+08	3.42012e+08	2.28138e+08	2.34309e+08	3.42715e+08	2.31223e+08	-0.567722	0.000804504	0.0202105	1.81653	(11E,15Z)-9,10,13-trihydroxyoctadeca-11,15-dienoic acid	--	C18 H32 O5	6.766	329.232	--	--	--	-	-	-	-
Com_803_pos	5.99491e+07	4.85222e+07	1.67206e+08	1.60474e+08	5.42356e+07	1.6384e+08	1.59498	0.00364064	0.0341858	1.79853	Senkyunolide A	--	C12 H16 O2	5.967	193.122	--	--	--	-	-	-	-
Com_252_pos	4.97182e+08	4.64261e+08	3.88733e+08	3.64459e+08	4.80721e+08	3.76596e+08	-0.352184	0.03648	0.0991558	1.72448	N-[2-chloro-6-(trifluoromethoxy)phenyl]-2,2-dimethylpropanamide	--	C12 H13 Cl F3 N O2	1.243	296.065	--	--	--	-	-	-	-
Com_872_pos	1.19187e+08	1.24715e+08	2.17526e+07	2.17503e+07	1.21951e+08	2.17514e+07	-2.48712	0.000760167	0.0202105	1.72225	Ajugol	--	C15 H24 O9	5.669	371.13	--	--	--	-	-	-	-
Com_596_pos	8.18387e+07	8.46187e+07	1.76577e+08	1.89696e+08	8.32287e+07	1.83136e+08	1.13777	0.00447366	0.0365767	1.71682	WMH	--	C22 H28 N6 O4 S	5.483	473.199	--	--	--	-	-	-	-
Com_429_pos	1.97888e+08	1.99678e+08	2.90505e+08	3.06681e+08	1.98783e+08	2.98593e+08	0.586987	0.00658165	0.0431182	1.71423	Palmitic Acid	--	C16 H32 O2	6.229	274.274	Fatty Acyls	57-10-3	HMDB0000220	C00249	ko01100//Metabolic pathways;ko01040//Biosynthesis of unsaturated fatty acids;ko00073//Cutin, suberine and wax biosynthesis;ko00061//Fatty acid biosynthesis;ko00071//Fatty acid degradation;ko00062//Fatty acid elongation;ko01212//Fatty acid metabolism	Global and overview maps;Lipid metabolism	Metabolism
Com_347_pos	3.37679e+08	2.91094e+08	2.09924e+08	2.11573e+08	3.14387e+08	2.10749e+08	-0.577015	0.0470362	0.112843	1.71045	Isoliensinine	--	C37 H42 N2 O6	6.248	611.303	Isoquinolines and derivatives	6817-41-0	HMDB0033749	-	-	-	-
Com_1073_pos	1.0148e+08	1.00373e+08	2.52849e+06	2.95616e+06	1.00927e+08	2.74233e+06	-5.20176	3.64654e-05	0.00931692	1.70545	Stercobilin	--	C33 H46 N4 O6	5.519	595.348	Tetrapyrroles and derivatives	-	HMDB0240259	C05793	ko00860//Porphyrin and chlorophyll metabolism	Metabolism of cofactors and vitamins	Metabolism
Com_561_pos	1.1005e+08	1.37453e+08	2.30721e+08	2.16159e+08	1.23752e+08	2.2344e+08	0.852441	0.0233783	0.0780804	1.69797	(2E,4E)-N-(2-methylpropyl)dodeca-2,4-dienamide	--	C16 H29 N O	8.562	252.232	--	--	--	-	-	-	-
Com_160_pos	4.76232e+08	4.6206e+08	3.68552e+08	3.75498e+08	4.69146e+08	3.72025e+08	-0.334638	0.0065372	0.0431182	1.69052	SM (d14:2/12:1)	--	C31 H59 N2 O6 P	7.514	587.43	--	--	--	-	-	-	-
Com_558_pos	1.00234e+08	8.5584e+07	1.8142e+08	1.97012e+08	9.29089e+07	1.89216e+08	1.02614	0.0121134	0.0565644	1.67919	2-Hydroxycinnamic acid	--	C9 H8 O3	5.209	165.054	Cinnamic acids and derivatives	-	HMDB0134028	C01772	ko01110//Biosynthesis of secondary metabolites;ko01120//Microbial metabolism in diverse environments;ko00940//Phenylpropanoid biosynthesis;ko00360//Phenylalanine metabolism	Amino acid metabolism;Biosynthesis of other secondary metabolites;Global and overview maps	Metabolism
Com_702_pos	1.29572e+08	1.53089e+08	4.84222e+07	4.92973e+07	1.4133e+08	4.88597e+07	-1.53235	0.0158096	0.0643877	1.64198	Ecgonine methyl ester	--	C10 H17 N O3	2.364	200.128	Carboxylic acids and derivatives	-	HMDB0062751	C12448	ko01100//Metabolic pathways;ko01110//Biosynthesis of secondary metabolites;ko00960//Tropane, piperidine and pyridine alkaloid biosynthesis	Biosynthesis of other secondary metabolites;Global and overview maps	Metabolism
Com_586_pos	9.64717e+07	8.20359e+07	1.72452e+08	1.89053e+08	8.92538e+07	1.80753e+08	1.01803	0.0141462	0.0613689	1.6351	Coumarin	--	C9 H6 O2	5.324	147.044	Coumarins and derivatives	91-64-5	HMDB0001218	C05851	ko01110//Biosynthesis of secondary metabolites;ko00940//Phenylpropanoid biosynthesis	Biosynthesis of other secondary metabolites;Global and overview maps	Metabolism
Com_177_pos	7.88663e+07	6.78981e+07	1.51232e+08	1.73848e+08	7.33822e+07	1.6254e+08	1.14729	0.0192961	0.0722366	1.60997	--	Cycloleucine	C6 H11 N O2	1.54	130.086	--	--	--	-	-	-	-
Com_416_pos	1.40382e+08	1.30153e+08	2.07945e+08	2.41172e+08	1.35267e+08	2.24558e+08	0.731275	0.0358723	0.098818	1.59773	Isorhapontigenin	--	C15 H14 O4	5.787	259.096	Stilbenes	-	HMDB0128522	-	-	-	-
Com_683_pos	1.35687e+08	1.62136e+08	7.16558e+07	6.03373e+07	1.48912e+08	6.59966e+07	-1.17399	0.0288025	0.0853169	1.54482	T-2 Triol	--	C20 H30 O7	5.669	366.175	Prenol lipids	34114-98-2	HMDB0035396	-	-	-	-
Com_1131_pos	3.16549e+07	2.93751e+07	1.04637e+08	1.12512e+08	3.0515e+07	1.08574e+08	1.83109	0.00274672	0.0301844	1.51879	4-Hydroxybenzaldehyde	--	C7 H6 O2	4.75	123.044	Organooxygen compounds	123-08-0	HMDB0011718	C00633	ko01100//Metabolic pathways;ko01120//Microbial metabolism in diverse environments	Global and overview maps	Metabolism
Com_801_pos	6.75013e+07	7.20176e+07	1.59353e+08	1.3512e+08	6.97594e+07	1.47237e+08	1.07768	0.0243853	0.078413	1.49583	1-adamantyl(1,4-thiazinan-4-yl)methanone	--	C15 H23 N O S	1.245	266.159	--	--	--	-	-	-	-
Com_545_pos	1.27133e+08	1.18771e+08	4.54155e+07	4.92739e+07	1.22952e+08	4.73447e+07	-1.37682	0.00368835	0.0341858	1.49375	Pyridoxine	--	C8 H11 N O3	4.937	170.081	Pyridines and derivatives	65-23-6	HMDB0000239	C00314	ko01100//Metabolic pathways;ko01120//Microbial metabolism in diverse environments;ko00750//Vitamin B6 metabolism	Global and overview maps;Metabolism of cofactors and vitamins	Metabolism
Com_1508_pos	2.54788e+06	2.7947e+06	7.60871e+07	7.95679e+07	2.67129e+06	7.78275e+07	4.86467	0.00053852	0.0189763	1.49183	Ampiroxicam	--	C20 H21 N3 O7 S	5.494	448.118	--	--	--	-	-	-	-
Com_1431_pos	9.95071e+06	1.05358e+07	8.25043e+07	8.45453e+07	1.02433e+07	8.35248e+07	3.02753	0.000209788	0.0159337	1.47331	Scopoletin	--	C10 H8 O4	5.083	193.049	Coumarins and derivatives	92-61-5	HMDB0034344	C01752	ko01110//Biosynthesis of secondary metabolites;ko00940//Phenylpropanoid biosynthesis	Biosynthesis of other secondary metabolites;Global and overview maps	Metabolism
Com_1361_pos	1.85855e+07	1.64424e+07	8.65103e+07	8.48404e+07	1.75139e+07	8.56754e+07	2.29038	0.000396949	0.0160883	1.42068	Skimmin	--	C15 H16 O8	5.05	325.091	--	--	--	-	-	-	-
Com_435_pos	1.98595e+08	1.7806e+08	2.47954e+08	2.69749e+08	1.88327e+08	2.58851e+08	0.45888	0.0422372	0.1068	1.41513	trans-Aconitic acid	--	C6 H6 O6	2.094	175.023	Carboxylic acids and derivatives	4023-65-8	HMDB0000958	C02341	ko00660//C5-Branched dibasic acid metabolism	Carbohydrate metabolism	Metabolism
Com_470_pos	2.31721e+08	2.27016e+08	1.6793e+08	1.5821e+08	2.29368e+08	1.6307e+08	-0.492173	0.00656748	0.0431182	1.3971	Idebenone	--	C19 H30 O5	6.15	339.216	--	--	--	-	-	-	-
Com_1728_pos	3.87144e+06	3.7494e+06	6.66011e+07	6.7128e+07	3.81042e+06	6.68646e+07	4.13322	1.83937e-05	0.00931692	1.36674	--	Quercetin-3,4'-O-di-beta-glucopyranoside	C27 H30 O17	5.019	627.156	--	--	--	-	-	-	-
Com_775_pos	1.52354e+08	1.37688e+08	8.29905e+07	8.11309e+07	1.45021e+08	8.20607e+07	-0.821494	0.013505	0.0600092	1.3565	Leucylproline	--	C11 H20 N2 O3	5.044	229.155	Carboxylic acids and derivatives	-	HMDB0011175	-	-	-	-
Com_1120_pos	9.90852e+07	9.60428e+07	3.80951e+07	3.39435e+07	9.7564e+07	3.60193e+07	-1.43758	0.00174399	0.0248464	1.34921	DGTS (2:0/10:0)	--	C22 H41 N O7	5.617	432.295	--	--	--	-	-	-	-
Com_378_pos	2.20013e+08	2.32844e+08	1.68405e+08	1.60894e+08	2.26428e+08	1.6465e+08	-0.459656	0.0141713	0.0613689	1.34344	SM (d14:3/12:1)	--	C31 H57 N2 O6 P	6.717	585.414	--	--	--	-	-	-	-
Com_1593_pos	1.14168e+07	6.99235e+06	6.62629e+07	7.37829e+07	9.20457e+06	7.00229e+07	2.9274	0.00510577	0.0392338	1.33907	2-{1-[2-(1-benzothiophen-5-ylamino)-2-oxoethyl]cyclohexyl}acetic acid	--	C18 H21 N O3 S	2.127	332.134	--	--	--	-	-	-	-
Com_924_pos	7.81998e+07	6.43983e+07	1.22621e+08	1.39851e+08	7.1299e+07	1.31236e+08	0.880211	0.0322821	0.0931987	1.31133	纬-Linolenic acid ethyl ester	--	C20 H34 O2	10.723	313.273	--	--	--	-	-	-	-
Com_913_pos	4.32047e+07	4.12351e+07	1.0857e+08	9.2612e+07	4.22199e+07	1.00591e+08	1.25251	0.0184476	0.0698276	1.30237	Phenmetrazine	--	C11 H15 N O	4.894	178.123	Oxazinanes	134-49-6	HMDB0014968	-	-	-	-
Com_1224_pos	4.34862e+07	4.3409e+07	9.76797e+07	1.01193e+08	4.34476e+07	9.94363e+07	1.1945	0.000983329	0.021847	1.28736	--	Geranylacetone	C13 H22 O	5.624	195.174	Prenol lipids	3796-70-1	HMDB0031846	-	-	-	-
Com_592_pos	1.29718e+08	1.41586e+08	7.44842e+07	8.34767e+07	1.35652e+08	7.89804e+07	-0.780343	0.0168235	0.0668388	1.28452	Avocadyne 1-acetate	--	C19 H34 O4	7.149	309.242	Fatty Acyls	24607-06-5	HMDB0031048	-	-	-	-
Com_430_pos	2.3613e+08	2.45449e+08	3.10797e+08	2.87125e+08	2.40789e+08	2.98961e+08	0.312186	0.0446363	0.109853	1.28246	Lofepramine	--	C26 H27 Cl N2 O	5.52	441.173	Benzazepines	50-49-7	HMDB0001848	-	-	-	-
Com_863_pos	1.32915e+08	1.26153e+08	7.71142e+07	7.31203e+07	1.29534e+08	7.51172e+07	-0.786114	0.00516575	0.0393985	1.26651	Aurantio-obtusin 尾-D-glucoside	--	C23 H24 O12	5.665	493.133	--	--	--	-	-	-	-
Com_507_pos	1.54443e+07	1.54398e+07	6.81982e+07	7.0173e+07	1.54421e+07	6.91856e+07	2.16361	0.000337384	0.0159471	1.26165	Cinanserin	--	C20 H24 N2 O S	6.775	341.174	--	--	--	-	-	-	-
Com_1337_pos	3.78769e+07	4.18072e+07	8.89262e+07	9.02284e+07	3.9842e+07	8.95773e+07	1.16884	0.00172815	0.0248464	1.21282	Stiripentol	--	C14 H18 O3	5.486	217.122	--	--	--	-	-	-	-
Com_1884_pos	1.45754e+07	9.41816e+06	6.23635e+07	5.99054e+07	1.19968e+07	6.11345e+07	2.34934	0.00336248	0.0339975	1.20442	PC (2:0/16:3)	--	C26 H46 N O8 P	6.382	532.303	--	--	--	-	-	-	-
Com_253_pos	7.76056e+07	6.82286e+07	1.3225e+08	1.14932e+08	7.29171e+07	1.23591e+08	0.761247	0.0357462	0.0987368	1.20263	Stearamide	--	C18 H37 N O	10.578	284.294	Fatty Acyls	124-26-5	HMDB0034146	-	-	-	-
Com_1333_pos	4.04857e+07	4.23347e+07	9.37748e+07	8.54953e+07	4.14102e+07	8.9635e+07	1.11408	0.00764789	0.0446914	1.19042	N-Methylparoxetine	--	C20 H22 F N O3	5.354	344.17	--	--	--	-	-	-	-
Com_2001_pos	5.08671e+07	4.74515e+07	1.57084e+06	1.98758e+06	4.91593e+07	1.77921e+06	-4.78816	0.00131595	0.024016	1.18395	--	Neotuberostemonine	C22 H33 N O4	8.328	376.246	--	--	--	-	-	-	-
Com_1329_pos	8.25313e+07	6.8493e+07	2.66885e+07	2.82392e+07	7.55121e+07	2.74638e+07	-1.45917	0.0209257	0.0740001	1.18046	Tomelukast	--	C16 H22 N4 O3	5.316	654.369	--	--	--	-	-	-	-
Com_1737_pos	6.01667e+07	5.57877e+07	9.95833e+06	1.32449e+07	5.79772e+07	1.16016e+07	-2.32116	0.00346651	0.0339975	1.16998	2-{[(4,5-dimethoxy-2-nitrophenethyl)imino]methyl}phenol	--	C17 H18 N2 O5	5.669	331.138	--	--	--	-	-	-	-
Com_971_pos	3.64898e+07	2.8021e+07	7.8823e+07	7.85485e+07	3.22554e+07	7.86857e+07	1.28656	0.00822354	0.0462007	1.16798	--	1-Monopalmitin	C19 H38 O4	7.422	353.268	Glycerolipids	32899-41-5	HMDB0011564	-	-	-	-
Com_1210_pos	5.0964e+07	5.17585e+07	9.2224e+07	1.0201e+08	5.13612e+07	9.7117e+07	0.919044	0.0113158	0.0553339	1.15797	Cuminaldehyde	--	C10 H12 O	5.356	149.096	Prenol lipids	122-03-2	HMDB0002214	C06577	ko01120//Microbial metabolism in diverse environments;ko01220//Degradation of aromatic compounds	Global and overview maps	Metabolism
Com_436_pos	6.02766e+07	5.51627e+07	1.14154e+08	9.55954e+07	5.77197e+07	1.04874e+08	0.861529	0.039227	0.101751	1.15794	--	DGMG (18:2)	C33 H58 O14	8.559	679.39	--	--	--	-	-	-	-
Com_890_pos	7.27374e+07	7.51756e+07	1.17739e+08	1.2015e+08	7.39565e+07	1.18945e+08	0.685541	0.00144922	0.0246851	1.15369	3-Methoxy prostaglandin F1伪	--	C21 H38 O6	7.093	391.245	--	--	--	-	-	-	-
Com_869_pos	9.20397e+07	8.29522e+07	1.32339e+08	1.3071e+08	8.7496e+07	1.31524e+08	0.588042	0.0108147	0.0536443	1.13584	N-Acetyl-L-aspartic acid	--	C6 H9 N O5	1.12	176.058	Carboxylic acids and derivatives	997-55-7	HMDB0000812	C01042	ko01100//Metabolic pathways;ko00250//Alanine, aspartate and glutamate metabolism	Amino acid metabolism;Global and overview maps	Metabolism
Com_1793_pos	9.94542e+06	8.55156e+06	5.21575e+07	5.18647e+07	9.24849e+06	5.20111e+07	2.49153	0.000277217	0.0159471	1.12537	--	Momordin Ic	C41 H64 O13	8.637	765.438	--	--	--	-	-	-	-
Com_829_pos	1.31991e+08	1.31888e+08	9.03173e+07	8.8627e+07	1.31939e+08	8.94722e+07	-0.560364	0.000397285	0.0160883	1.12147	Guanine	--	C5 H5 N5 O	3.184	152.057	Imidazopyrimidines	73-40-5	HMDB0000132	C00242	ko01100//Metabolic pathways;ko00230//Purine metabolism	Global and overview maps;Nucleotide metabolism	Metabolism
Com_597_pos	9.82074e+07	9.9161e+07	5.58965e+07	5.70576e+07	9.86842e+07	5.64771e+07	-0.805155	0.000316638	0.0159471	1.11799	Psychosine	--	C24 H47 N O7	5.56	462.342	-	2238-90-6	HMDB0000648	C01747	ko00600//Sphingolipid metabolism	Lipid metabolism	Metabolism
Com_306_pos	6.61383e+06	5.89894e+06	4.71083e+07	4.80703e+07	6.25638e+06	4.75893e+07	2.92724	0.000210146	0.0159337	1.10648	gamma-Glutamyltyrosine	--	C14 H18 N2 O6	6.43	311.127	Carboxylic acids and derivatives	7432-23-7	HMDB0011741	-	-	-	-
Com_883_pos	1.04331e+08	9.4967e+07	6.23617e+07	5.36875e+07	9.96488e+07	5.80246e+07	-0.780188	0.0227104	0.076716	1.09805	Asparagine	--	C4 H8 N2 O3	1.308	133.061	Carboxylic acids and derivatives	70-47-3	HMDB0000168	-	-	-	-
Com_1536_pos	6.02267e+07	6.33475e+07	2.36901e+07	2.18222e+07	6.17871e+07	2.27561e+07	-1.44105	0.00216386	0.0276433	1.07421	LSD-d3	--	C20 H22 [2]H3 N3 O	10.696	327.226	--	--	--	-	-	-	-
Com_548_pos	1.63323e+08	1.57199e+08	1.20119e+08	1.23639e+08	1.60261e+08	1.21879e+08	-0.394972	0.0083617	0.0462007	1.06173	Testosterone	--	C19 H28 O2	7.252	289.216	Steroids and steroid derivatives	651-45-6	HMDB0002833	C00535	ko01100//Metabolic pathways;ko01120//Microbial metabolism in diverse environments	Global and overview maps	Metabolism
Com_1876_pos	4.33613e+07	5.14821e+07	1.06422e+07	9.9227e+06	4.74217e+07	1.02824e+07	-2.20536	0.0118332	0.0565644	1.04273	D-(+)-Proline	--	C5 H9 N O2	5.829	116.07	--	--	--	-	-	-	-
Com_2000_pos	1.75481e+07	1.80183e+07	5.4093e+07	5.472e+07	1.77832e+07	5.44065e+07	1.61327	0.000114467	0.0159337	1.04158	PC (5:0/13:1)	--	C26 H50 N O8 P	7.007	536.334	--	--	--	-	-	-	-
Com_1348_pos	4.47219e+07	3.89214e+07	7.65555e+07	7.99475e+07	4.18217e+07	7.82515e+07	0.903867	0.00839854	0.0462007	1.03461	2-(acetylamino)-3-[4-(acetylamino)phenyl]acrylic acid	--	C13 H14 N2 O4	5.32	263.102	--	--	--	-	-	-	-
Com_1161_pos	2.37729e+07	2.32453e+07	6.44074e+07	5.55631e+07	2.35091e+07	5.99853e+07	1.35139	0.0144316	0.061568	1.03168	Prostaglandin E2-1-glyceryl ester	--	C23 H38 O7	7.41	409.255	--	--	--	-	-	-	-
Com_2056_pos	1.42035e+07	1.50799e+07	4.92897e+07	5.07391e+07	1.46417e+07	5.00144e+07	1.77226	0.000572739	0.0189763	1.02343	PC (2:0/16:2)	--	C26 H48 N O8 P	6.737	534.32	--	--	--	-	-	-	-
Com_659_pos	8.98933e+07	8.90772e+07	5.64788e+07	5.30978e+07	8.94852e+07	5.47883e+07	-0.707782	0.00250262	0.0294858	1.0127	SM (d14:0/12:1)	--	C31 H63 N2 O6 P	7.921	591.462	--	--	--	-	-	-	-

## Sheet: NEG_CK-T1
index	CK-1	CK-2	T1-1	T1-2	control_mean	case_mean	log2_FC(case_mean/control_mean)	Pvalue	fdr	vip	MS2_name	MS1_name	formula	rtmin	mz	Class	CAS	HMDB	C_ID	Pathway	KEGG_B_class	KEGG_A_class
Com_11_neg	7.9061e+09	8.18739e+09	1.06052e+10	1.06038e+10	8.04675e+09	1.06045e+10	0.3982	0.00301012	0.0536682	10.5918	(卤)9-HpODE	--	C18 H32 O4	7.904	311.223	--	--	--	-	-	-	-
Com_30_neg	2.78087e+09	2.56236e+09	1.87523e+09	1.78667e+09	2.67162e+09	1.83095e+09	-0.545122	0.0191029	0.104322	6.03044	12-Oxo phytodienoic acid	--	C18 H28 O3	7.189	291.197	--	--	--	-	-	-	-
Com_152_neg	9.9899e+07	1.03587e+08	4.31357e+08	4.48476e+08	1.01743e+08	4.39916e+08	2.1123	0.0006697	0.032816	3.85361	Bilobalide	--	C15 H18 O8	5.193	325.093	Prenol lipids	33570-04-6	HMDB0036735	-	-	-	-
Com_126_neg	2.65554e+08	2.47954e+08	5.71834e+08	5.64931e+08	2.56754e+08	5.68383e+08	1.14648	0.000918793	0.0376919	3.6966	--	Ixoside	C16 H20 O11	5.059	387.093	--	--	--	-	-	-	-
Com_80_neg	4.42088e+08	4.00742e+08	6.9986e+08	6.85954e+08	4.21415e+08	6.92907e+08	0.717421	0.00639212	0.0658118	3.43845	Dihydroroseoside	--	C19 H32 O8	5.357	387.203	Fatty Acyls	142235-28-7	HMDB0040614	-	-	-	-
Com_45_neg	3.54951e+08	3.49269e+08	1.76775e+08	1.77944e+08	3.5211e+08	1.77359e+08	-0.989351	0.000275381	0.025163	2.77083	N-Acetyl-L-phenylalanine	--	C11 H13 N O3	5.475	206.082	Carboxylic acids and derivatives	2018-61-3	HMDB0000512	C03519	ko00360//Phenylalanine metabolism	Amino acid metabolism	Metabolism
Com_351_neg	1.81247e+08	1.80918e+08	8.23357e+06	8.68453e+06	1.81082e+08	8.45905e+06	-4.42001	2.6132e-06	0.00191025	2.75373	Parishin E	--	C19 H24 O13	4.957	459.115	--	--	--	-	-	-	-
Com_102_neg	7.80554e+08	7.33151e+08	5.82515e+08	5.93471e+08	7.56853e+08	5.87993e+08	-0.364213	0.0201288	0.105292	2.7008	Elaidic acid	--	C18 H34 O2	10.693	281.248	Fatty Acyls	112-79-8	HMDB0000573	-	-	-	-
Com_141_neg	2.36165e+08	2.13487e+08	3.81155e+08	3.92057e+08	2.24826e+08	3.86606e+08	0.782054	0.00599343	0.0637648	2.65563	Succinic acid	--	C4 H6 O4	2.549	117.019	Carboxylic acids and derivatives	110-15-6	HMDB0000254	C00042	ko01100//Metabolic pathways;ko01110//Biosynthesis of secondary metabolites;ko01120//Microbial metabolism in diverse environments;ko01130//Biosynthesis of antibiotics;ko00360//Phenylalanine metabolism;ko01200//Carbon metabolism;ko00350//Tyrosine metabolism;ko00250//Alanine, aspartate and glutamate metabolism;ko01220//Degradation of aromatic compounds;ko00630//Glyoxylate and dicarboxylate metabolis…	Amino acid metabolism;Carbohydrate metabolism;Energy metabolism;Global and overview maps;Metabolism of cofactors and vitamins	Metabolism
Com_321_neg	2.0033e+08	2.05414e+08	5.89643e+07	4.32208e+07	2.02872e+08	5.10926e+07	-1.98938	0.00295703	0.0536682	2.57821	PA (3:0/22:3)	--	C28 H49 O8 P	6.251	543.317	--	--	--	-	-	-	-
Com_148_neg	4.69518e+08	4.82514e+08	3.38258e+08	3.40492e+08	4.76016e+08	3.39375e+08	-0.488132	0.00232007	0.0497672	2.44546	3,8,9-trihydroxy-10-propyl-3,4,5,8,9,10-hexahydro-2H-oxecin-2-one	--	C12 H20 O5	5.685	243.124	--	--	--	-	-	-	-
Com_426_neg	1.31325e+08	1.40418e+08	2.96822e+07	3.12576e+07	1.35871e+08	3.04699e+07	-2.15679	0.00191127	0.0436763	2.14837	MGDG (2:0/16:3)	--	C27 H44 O10	6.246	587.307	--	--	--	-	-	-	-
Com_163_neg	4.61675e+08	4.51281e+08	3.50206e+08	3.61891e+08	4.56478e+08	3.56049e+08	-0.35847	0.00600743	0.0637648	2.09508	3-Hydroxysebacic acid	--	C10 H18 O5	5.582	217.108	Hydroxy acids and derivatives	73141-46-5	HMDB0000350	-	-	-	-
Com_262_neg	1.48635e+08	1.35183e+08	2.40928e+08	2.39836e+08	1.41909e+08	2.40382e+08	0.76036	0.00466322	0.0599847	2.07299	Picroside III	--	C25 H30 O13	5.522	537.161	--	--	--	-	-	-	-
Com_151_neg	3.20851e+08	3.2692e+08	2.16823e+08	2.41455e+08	3.23885e+08	2.29139e+08	-0.499261	0.0174546	0.101972	2.02033	LPC 18:1	--	C26 H52 N O7 P	9.362	566.346	--	--	--	-	-	-	-
Com_156_neg	1.58059e+08	1.51805e+08	2.28011e+08	2.269e+08	1.54932e+08	2.27455e+08	0.553949	0.00191196	0.0436763	1.78207	--	Tricin 5-O-hexoside derivative	C24 H22 O14	5.521	533.093	--	--	--	-	-	-	-
Com_581_neg	9.91272e+07	9.36007e+07	2.41515e+07	2.58673e+07	9.6364e+07	2.50094e+07	-1.94602	0.00164021	0.0436763	1.76984	Mangostin	--	C24 H26 O6	5.013	409.172	Benzopyrans	1551491	HMDB0035796	-	-	-	-
Com_643_neg	8.77333e+07	8.25127e+07	1.51081e+07	1.74481e+07	8.5123e+07	1.62781e+07	-2.38661	0.00172197	0.0436763	1.73831	MGDG (2:0/16:4)	--	C27 H42 O10	5.963	585.292	--	--	--	-	-	-	-
Com_196_neg	6.59823e+07	6.41913e+07	1.31834e+08	1.27767e+08	6.50868e+07	1.29801e+08	0.995862	0.00117664	0.0390964	1.68453	Quercetin-3-O-beta-glucopyranosyl-6'-acetate	--	C23 H22 O13	5.417	505.099	--	--	--	-	-	-	-
Com_472_neg	1.27986e+08	1.16007e+08	6.74882e+07	5.24378e+07	1.21996e+08	5.9963e+07	-1.02469	0.0232043	0.113841	1.63439	Suberic acid	--	C8 H14 O4	5.551	173.082	Fatty Acyls	505-48-6	HMDB0000893	-	-	-	-
Com_659_neg	8.45696e+07	6.33536e+07	1.54173e+07	1.54719e+07	7.39616e+07	1.54446e+07	-2.25967	0.0313268	0.133139	1.58187	Mevalonic acid	--	C6 H12 O4	5.066	147.066	Fatty Acyls	150-97-0	HMDB0000227	C00418	ko01100//Metabolic pathways;ko01110//Biosynthesis of secondary metabolites;ko01130//Biosynthesis of antibiotics;ko00900//Terpenoid backbone biosynthesis	Global and overview maps;Metabolism of terpenoids and polyketides	Metabolism
Com_208_neg	5.40326e+07	5.58824e+07	1.03362e+08	1.18128e+08	5.49575e+07	1.10745e+08	1.01085	0.0173268	0.101972	1.55295	Fumaric acid	--	C4 H4 O4	1.715	115.003	Carboxylic acids and derivatives	110-17-8	HMDB0000134	C00122	ko01100//Metabolic pathways;ko01110//Biosynthesis of secondary metabolites;ko01120//Microbial metabolism in diverse environments;ko01130//Biosynthesis of antibiotics;ko00360//Phenylalanine metabolism;ko01200//Carbon metabolism;ko00350//Tyrosine metabolism;ko00250//Alanine, aspartate and glutamate metabolism;ko01220//Degradation of aromatic compounds;ko00220//Arginine biosynthesis;ko00760//Nicotin…	Amino acid metabolism;Carbohydrate metabolism;Energy metabolism;Global and overview maps;Metabolism of cofactors and vitamins	Metabolism
Com_852_neg	6.03202e+07	5.47915e+07	2.9585e+06	5.30624e+06	5.75558e+07	4.13237e+06	-3.79992	0.0031454	0.0547449	1.53046	--	Octanedioic acid	C8 H14 O4	5.636	393.178	Fatty Acyls	505-48-6	HMDB0000893	-	-	-	-
Com_824_neg	6.33498e+07	5.67486e+07	1.07713e+07	1.81178e+06	6.00492e+07	6.29153e+06	-3.25466	0.0105447	0.0845649	1.53034	LPA 17:0	--	C20 H41 O7 P	5.853	423.25	--	--	--	-	-	-	-
Com_364_neg	1.61105e+08	1.71212e+08	1.12765e+08	1.15775e+08	1.66159e+08	1.1427e+08	-0.54012	0.0101686	0.0845649	1.4999	(卤)9(10)-DiHOME	--	C18 H34 O4	7.546	313.238	--	--	--	-	-	-	-
Com_567_neg	3.33268e+06	3.40827e+06	5.3177e+07	5.37624e+07	3.37048e+06	5.34697e+07	3.9877	3.46994e-05	0.0126826	1.48351	4,5-Dicaffeoylquinic acid	--	C25 H24 O12	5.317	515.119	Alcohols and polyols	57378-72-0	HMDB0030707	-	-	-	-
Com_618_neg	8.02639e+07	8.93613e+07	3.6079e+07	3.38859e+07	8.48126e+07	3.49825e+07	-1.27765	0.00870222	0.0807273	1.47134	Orcinol gentiobioside	--	C19 H28 O12	5.302	447.151	--	--	--	-	-	-	-
Com_503_neg	6.00794e+07	5.12743e+07	1.09998e+08	9.90551e+07	5.56768e+07	1.04526e+08	0.908719	0.0200478	0.105292	1.44772	--	Sinapoyl O-hexoside	C17 H22 O10	5.282	385.114	--	--	--	-	-	-	-
Com_501_neg	1.05623e+08	9.98098e+07	5.97531e+07	5.75673e+07	1.02716e+08	5.86602e+07	-0.808211	0.00493118	0.0606285	1.38909	4-((5-(4-Nitrophenyl)oxazol-2-yl)amino)benzonitrile	--	C16 H10 N4 O3	5.26	305.07	--	--	--	-	-	-	-
Com_866_neg	5.9125e+07	5.76187e+07	9.59563e+06	2.1204e+07	5.83719e+07	1.53998e+07	-1.92236	0.0180501	0.102284	1.36109	PI (3:0/18:4)	--	C30 H49 O13 P	5.891	629.282	--	--	--	-	-	-	-
Com_285_neg	1.45761e+08	1.38938e+08	1.87057e+08	1.81297e+08	1.42349e+08	1.84177e+08	0.371659	0.0112018	0.0845649	1.34604	LPC 18:2	--	C26 H50 N O7 P	9.004	564.33	--	--	--	-	-	-	-
Com_639_neg	7.91338e+07	8.63639e+07	3.17201e+07	4.78511e+07	8.27489e+07	3.97856e+07	-1.05649	0.0398125	0.147731	1.34365	2-(1-benzothiophen-3-ylmethylene)-3,4-dihydronaphthalen-1(2H)-one	--	C19 H14 O S	1.423	289.069	--	--	--	-	-	-	-
Com_1157_neg	4.07912e+07	3.64299e+07	4.95973e+06	4.79756e+06	3.86105e+07	4.87865e+06	-2.98444	0.00415892	0.0596112	1.21582	4-Oxoproline	--	C5 H7 N O3	1.445	128.035	--	--	--	C01877	ko00330//Arginine and proline metabolism	Amino acid metabolism	Metabolism
Com_1109_neg	4.31628e+07	4.1088e+07	1.2283e+07	1.32937e+07	4.21254e+07	1.27883e+07	-1.71986	0.00154356	0.0436763	1.13481	16伪-Hydroxyestrone	--	C18 H22 O3	5.169	285.146	--	--	--	-	-	-	-
Com_1213_neg	3.63079e+07	3.73122e+07	9.80846e+06	5.75315e+06	3.68101e+07	7.7808e+06	-2.24211	0.0051382	0.0606285	1.12637	MGDG (2:0/16:2)	--	C27 H46 O10	6.256	589.323	--	--	--	-	-	-	-
Com_890_neg	5.73946e+07	5.42756e+07	2.5921e+07	2.80729e+07	5.58351e+07	2.69969e+07	-1.04838	0.00428873	0.0598003	1.12377	LPA 16:3	--	C19 H33 O7 P	6.217	403.197	--	--	--	-	-	-	-
Com_249_neg	5.71995e+07	5.37287e+07	8.40868e+07	8.44019e+07	5.54641e+07	8.42443e+07	0.603026	0.00364596	0.0567063	1.12144	PA (2:0/22:3)	--	C27 H47 O8 P	6.808	529.302	--	--	--	-	-	-	-
Com_381_neg	5.66613e+07	6.17718e+07	8.99535e+07	8.53518e+07	5.92166e+07	8.76527e+07	0.565796	0.0143083	0.0952839	1.11064	PI (2:0/22:3)	--	C33 H57 O13 P	6.624	691.354	--	--	--	-	-	-	-
Com_679_neg	6.31687e+07	6.05183e+07	3.14653e+07	3.83039e+07	6.18435e+07	3.48846e+07	-0.82603	0.0180051	0.102284	1.07859	5-Methoxypsoralen	--	C12 H8 O4	1.433	215.032	Coumarins and derivatives	484-20-8	HMDB0030637	C01557	ko01110//Biosynthesis of secondary metabolites	Global and overview maps	Metabolism
Com_878_neg	1.14816e+07	1.31098e+07	3.89135e+07	3.84789e+07	1.22957e+07	3.86962e+07	1.65403	0.00101715	0.0376919	1.07677	--	Arabidopyl ketoadipic acid	C15 H14 O9	5.357	337.057	--	--	--	-	-	-	-
Com_911_neg	5.56451e+07	5.44907e+07	2.88259e+07	2.86973e+07	5.50679e+07	2.87616e+07	-0.937068	0.000487006	0.0296668	1.07505	3-methyl-4-[2-(2-methylphenyl)hydrazono]-4,5-dihydro-1H-pyrazol-5-one	--	C11 H12 N4 O	5.418	215.092	--	--	--	-	-	-	-
Com_325_neg	1.22795e+08	1.23864e+08	9.12049e+07	1.01451e+08	1.23329e+08	9.63278e+07	-0.35649	0.0345165	0.137353	1.06907	Gentiopicrin	--	C16 H20 O9	5.243	355.103	--	--	--	C09782	ko01110//Biosynthesis of secondary metabolites	Global and overview maps	Metabolism
Com_632_neg	8.97062e+07	8.02189e+07	6.10787e+07	5.77491e+07	8.49625e+07	5.94139e+07	-0.516027	0.0366065	0.139955	1.0427	1a,1b-Dihomo prostaglandin F2伪	--	C22 H38 O5	7.88	381.264	--	--	--	-	-	-	-
Com_421_neg	2.29452e+07	2.1974e+07	4.9284e+07	4.4541e+07	2.24596e+07	4.69125e+07	1.06264	0.00965829	0.0840501	1.03074	Rutin	--	C27 H30 O16	5.373	609.146	Flavonoids	153-18-4	HMDB0003249	C05625	ko01100//Metabolic pathways;ko01110//Biosynthesis of secondary metabolites;ko00944//Flavone and flavonol biosynthesis	Biosynthesis of other secondary metabolites;Global and overview maps	Metabolism
Com_1210_neg	3.6841e+07	3.40331e+07	1.20647e+07	1.04422e+07	3.54371e+07	1.12534e+07	-1.65489	0.00446542	0.0598003	1.02934	4-Nitrophenol	--	C6 H5 N O3	5.384	138.019	Benzene and substituted derivatives	98-95-3	HMDB0041950	C00870	ko01120//Microbial metabolism in diverse environments	Global and overview maps	Metabolism
Com_605_neg	9.47148e+07	8.43691e+07	6.53677e+07	6.42837e+07	8.9542e+07	6.48257e+07	-0.465999	0.0415425	0.148861	1.02311	--	delta-Hexanolactone	C6 H10 O2	5.453	113.061	Lactones	823-22-3	HMDB0000453	-	-	-	-

## Sheet: NEG_CK-T2
index	CK-1	CK-2	T2-1	T2-2	control_mean	case_mean	log2_FC(case_mean/control_mean)	Pvalue	fdr	vip	MS2_name	MS1_name	formula	rtmin	mz	Class	CAS	HMDB	C_ID	Pathway	KEGG_B_class	KEGG_A_class
Com_11_neg	7.9061e+09	8.18739e+09	4.24613e+09	3.97471e+09	8.04675e+09	4.11042e+09	-0.96912	0.00245613	0.0260207	10.0332	(卤)9-HpODE	--	C18 H32 O4	7.904	311.223	--	--	--	-	-	-	-
Com_45_neg	3.54951e+08	3.49269e+08	3.03281e+09	3.0146e+09	3.5211e+08	3.0237e+09	3.10222	1.2742e-05	0.00911857	8.27422	N-Acetyl-L-phenylalanine	--	C11 H13 N O3	5.475	206.082	Carboxylic acids and derivatives	2018-61-3	HMDB0000512	C03519	ko00360//Phenylalanine metabolism	Amino acid metabolism	Metabolism
Com_30_neg	2.78087e+09	2.56236e+09	4.45851e+09	4.7682e+09	2.67162e+09	4.61336e+09	0.788103	0.00939122	0.043726	7.02481	12-Oxo phytodienoic acid	--	C18 H28 O3	7.189	291.197	--	--	--	-	-	-	-
Com_50_neg	3.03074e+08	3.14145e+08	1.39736e+09	1.50444e+09	3.0861e+08	1.4509e+09	2.23309	0.00221323	0.0258003	5.40773	DL-Malic acid	--	C4 H6 O5	1.692	133.014	Hydroxy acids and derivatives	6915-15-7	HMDB0000744	-	-	-	-
Com_53_neg	7.54195e+08	6.41313e+08	1.56422e+09	1.98811e+09	6.97754e+08	1.77617e+09	1.34798	0.0389641	0.0954583	5.16336	D-(+)-Malic acid	--	C4 H6 O5	1.521	133.014	Fatty Acyls	636-61-3	HMDB0031518	C00497	ko00650//Butanoate metabolism	Carbohydrate metabolism	Metabolism
Com_80_neg	4.42088e+08	4.00742e+08	1.13053e+09	1.13984e+09	4.21415e+08	1.13518e+09	1.42961	0.000880173	0.0220412	4.27462	Dihydroroseoside	--	C19 H32 O8	5.357	387.203	Fatty Acyls	142235-28-7	HMDB0040614	-	-	-	-
Com_68_neg	1.36272e+09	1.34903e+09	7.00074e+08	6.09833e+08	1.35587e+09	6.54954e+08	-1.04976	0.0042126	0.0314861	4.23278	--	13-HPODE	C18 H32 O4	7.006	311.223	Fatty Acyls	33964-75-9	HMDB0003871	C04717	ko01100//Metabolic pathways;ko00591//Linoleic acid metabolism	Global and overview maps;Lipid metabolism	Metabolism
Com_141_neg	2.36165e+08	2.13487e+08	5.64183e+08	5.56697e+08	2.24826e+08	5.6044e+08	1.31775	0.00126346	0.0237004	2.92991	Succinic acid	--	C4 H6 O4	2.549	117.019	Carboxylic acids and derivatives	110-15-6	HMDB0000254	C00042	ko01100//Metabolic pathways;ko01110//Biosynthesis of secondary metabolites;ko01120//Microbial metabolism in diverse environments;ko01130//Biosynthesis of antibiotics;ko00360//Phenylalanine metabolism;ko01200//Carbon metabolism;ko00350//Tyrosine metabolism;ko00250//Alanine, aspartate and glutamate metabolism;ko01220//Degradation of aromatic compounds;ko00630//Glyoxylate and dicarboxylate metabolis…	Amino acid metabolism;Carbohydrate metabolism;Energy metabolism;Global and overview maps;Metabolism of cofactors and vitamins	Metabolism
Com_234_neg	3.84924e+07	3.50914e+07	3.21973e+08	3.15468e+08	3.67919e+07	3.18721e+08	3.11483	0.00016941	0.0154799	2.68734	--	D-Phenylalanine	C9 H11 N O2	5.475	164.071	--	--	--	C02265	ko00360//Phenylalanine metabolism	Amino acid metabolism	Metabolism
Com_156_neg	1.58059e+08	1.51805e+08	3.87776e+08	3.85004e+08	1.54932e+08	3.8639e+08	1.31842	0.000218253	0.017727	2.43492	--	Tricin 5-O-hexoside derivative	C24 H22 O14	5.521	533.093	--	--	--	-	-	-	-
Com_257_neg	6.45516e+07	7.5755e+07	2.87959e+08	2.9454e+08	7.01533e+07	2.91249e+08	2.05367	0.000862285	0.0220412	2.38021	Esculin	--	C15 H16 O9	5.027	339.072	Coumarins and derivatives	531-75-9	HMDB0030820	-	-	-	-
Com_92_neg	8.17136e+08	9.02237e+08	6.0841e+08	6.61006e+08	8.59687e+08	6.34708e+08	-0.437718	0.0460467	0.105496	2.33919	(卤)13-HODE	--	C18 H32 O3	6.588	295.227	--	--	--	-	-	-	-
Com_126_neg	2.65554e+08	2.47954e+08	4.57316e+08	4.44362e+08	2.56754e+08	4.50839e+08	0.812226	0.00315447	0.0288112	2.22524	--	Ixoside	C16 H20 O11	5.059	387.093	--	--	--	-	-	-	-
Com_151_neg	3.20851e+08	3.2692e+08	1.34691e+08	1.33349e+08	3.23885e+08	1.3402e+08	-1.27304	0.000267812	0.0191994	2.20546	LPC 18:1	--	C26 H52 N O7 P	9.362	566.346	--	--	--	-	-	-	-
Com_175_neg	2.60552e+08	2.54896e+08	4.37377e+08	4.16736e+08	2.57724e+08	4.27057e+08	0.728602	0.00396996	0.0314861	2.07742	2-Propylglutaric acid	--	C8 H14 O4	5.653	173.082	Fatty Acyls	-	HMDB0060684	-	-	-	-
Com_102_neg	7.80554e+08	7.33151e+08	9.17971e+08	9.40185e+08	7.56853e+08	9.29078e+08	0.295788	0.0223268	0.0682881	2.07691	Elaidic acid	--	C18 H34 O2	10.693	281.248	Fatty Acyls	112-79-8	HMDB0000573	-	-	-	-
Com_163_neg	4.61675e+08	4.51281e+08	3.04897e+08	2.97242e+08	4.56478e+08	3.01069e+08	-0.600449	0.00172035	0.0241842	1.99502	3-Hydroxysebacic acid	--	C10 H18 O5	5.582	217.108	Hydroxy acids and derivatives	73141-46-5	HMDB0000350	-	-	-	-
Com_351_neg	1.81247e+08	1.80918e+08	2.10134e+07	4.97034e+07	1.81082e+08	3.53584e+07	-2.35652	0.00955298	0.0441976	1.92118	Parishin E	--	C19 H24 O13	4.957	459.115	--	--	--	-	-	-	-
Com_196_neg	6.59823e+07	6.41913e+07	2.0612e+08	1.99032e+08	6.50868e+07	2.02576e+08	1.63803	0.000706178	0.0220412	1.87586	Quercetin-3-O-beta-glucopyranosyl-6'-acetate	--	C23 H22 O13	5.417	505.099	--	--	--	-	-	-	-
Com_405_neg	1.57072e+07	1.56316e+07	1.61836e+08	1.3796e+08	1.56694e+07	1.49898e+08	3.25796	0.0078179	0.0396215	1.84564	--	Plantagoside	C21 H22 O12	4.984	465.104	--	--	--	-	-	-	-
Com_148_neg	4.69518e+08	4.82514e+08	3.54066e+08	3.61701e+08	4.76016e+08	3.57884e+08	-0.41152	0.00404496	0.0314861	1.73519	3,8,9-trihydroxy-10-propyl-3,4,5,8,9,10-hexahydro-2H-oxecin-2-one	--	C12 H20 O5	5.685	243.124	--	--	--	-	-	-	-
Com_240_neg	1.82555e+08	1.84032e+08	3.05167e+08	2.9504e+08	1.83293e+08	3.00103e+08	0.711306	0.00191364	0.0245415	1.72781	Dihydroartemisinin	--	C15 H24 O5	5.657	283.155	Prenol lipids	81496-81-3	HMDB0060593	-	-	-	-
Com_321_neg	2.0033e+08	2.05414e+08	1.02055e+08	1.05304e+08	2.02872e+08	1.03679e+08	-0.968442	0.000923445	0.0220412	1.59312	PA (3:0/22:3)	--	C28 H49 O8 P	6.251	543.317	--	--	--	-	-	-	-
Com_364_neg	1.61105e+08	1.71212e+08	6.02608e+07	7.54485e+07	1.66159e+08	6.78546e+07	-1.29204	0.00850028	0.0413949	1.57858	(卤)9(10)-DiHOME	--	C18 H34 O4	7.546	313.238	--	--	--	-	-	-	-
Com_285_neg	1.45761e+08	1.38938e+08	2.33991e+08	2.45785e+08	1.42349e+08	2.39888e+08	0.752927	0.0048429	0.032493	1.57794	LPC 18:2	--	C26 H50 N O7 P	9.004	564.33	--	--	--	-	-	-	-
Com_143_neg	1.53367e+07	1.41885e+07	1.04627e+08	1.09683e+08	1.47626e+07	1.07155e+08	2.85968	0.000786222	0.0220412	1.53861	Quercetin-3尾-D-glucoside	--	C21 H20 O12	5.401	463.088	--	--	--	-	-	-	-
Com_262_neg	1.48635e+08	1.35183e+08	5.59803e+07	5.85616e+07	1.41909e+08	5.7271e+07	-1.30909	0.00648398	0.0385349	1.46857	Picroside III	--	C25 H30 O13	5.522	537.161	--	--	--	-	-	-	-
Com_603_neg	2.55213e+07	2.56952e+07	1.01257e+08	1.05095e+08	2.56082e+07	1.03176e+08	2.01042	0.000612592	0.0220412	1.40992	--	Gly-Phe	C11 H14 N2 O3	5.087	221.093	Carboxylic acids and derivatives	-	HMDB0028848	-	-	-	-
Com_313_neg	2.18372e+08	2.05916e+08	1.46692e+08	1.22906e+08	2.12144e+08	1.34799e+08	-0.654238	0.0288314	0.0801358	1.39065	--	Azelaic acid	C9 H16 O4	5.875	187.097	Fatty Acyls	123-99-9	HMDB0000784	-	-	-	-
Com_581_neg	9.91272e+07	9.36007e+07	2.59564e+07	2.73874e+07	9.6364e+07	2.66719e+07	-1.85317	0.00167329	0.0240177	1.33555	Mangostin	--	C24 H26 O6	5.013	409.172	Benzopyrans	1551491	HMDB0035796	-	-	-	-
Com_426_neg	1.31325e+08	1.40418e+08	6.41823e+07	6.93948e+07	1.35871e+08	6.67886e+07	-1.02457	0.00570598	0.0353481	1.32565	MGDG (2:0/16:3)	--	C27 H44 O10	6.246	587.307	--	--	--	-	-	-	-
Com_441_neg	1.35098e+08	1.363e+08	6.63615e+07	6.95503e+07	1.35699e+08	6.79559e+07	-0.997736	0.000632114	0.0220412	1.31679	--	alpha-Zearalanol	C18 H26 O5	6.106	321.171	Macrolides and analogues	26538-44-3	HMDB0032702	-	-	-	-
Com_241_neg	2.60152e+08	2.41396e+08	1.81468e+08	1.83843e+08	2.50774e+08	1.82656e+08	-0.457261	0.018719	0.0617496	1.30983	Nystose	--	C24 H42 O21	5.445	355.104	Organooxygen compounds	13133-07-8	HMDB0039176	-	-	-	-
Com_193_neg	1.96928e+08	1.65137e+08	2.50477e+08	2.50727e+08	1.81033e+08	2.50602e+08	0.469151	0.0484465	0.10958	1.30054	PI (2:0/20:4)	--	C31 H51 O13 P	5.907	661.286	--	--	--	-	-	-	-
Com_687_neg	2.00154e+07	1.72716e+07	8.44953e+07	8.4808e+07	1.86435e+07	8.46516e+07	2.18286	0.000437299	0.0219025	1.30022	N-Acetyl-D-alloisoleucine	--	C8 H15 N O3	5.444	172.098	--	--	--	-	-	-	-
Com_618_neg	8.02639e+07	8.93613e+07	2.23701e+07	2.3162e+07	8.48126e+07	2.2766e+07	-1.8974	0.0053717	0.0347496	1.25691	Orcinol gentiobioside	--	C19 H28 O12	5.302	447.151	--	--	--	-	-	-	-
Com_472_neg	1.27986e+08	1.16007e+08	6.27446e+07	5.85419e+07	1.21996e+08	6.06433e+07	-1.00842	0.0105338	0.0469523	1.24865	Suberic acid	--	C8 H14 O4	5.551	173.082	Fatty Acyls	505-48-6	HMDB0000893	-	-	-	-
Com_871_neg	4.15392e+06	3.77393e+06	6.03881e+07	6.4907e+07	3.96392e+06	6.26475e+07	3.98226	0.00148958	0.0237004	1.22596	Safflomin A	--	C27 H32 O16	5.135	611.161	Cinnamic acids and derivatives	146087-19-6	HMDB0040677	-	-	-	-
Com_643_neg	8.77333e+07	8.25127e+07	2.92845e+07	3.54929e+07	8.5123e+07	3.23887e+07	-1.39406	0.00586329	0.0357172	1.15876	MGDG (2:0/16:4)	--	C27 H42 O10	5.963	585.292	--	--	--	-	-	-	-
Com_358_neg	1.79353e+08	1.62364e+08	1.19132e+08	1.19353e+08	1.70858e+08	1.19242e+08	-0.518905	0.0260335	0.0749231	1.13633	--	Aminophylline	C16 H24 N10 O4	5.569	419.192	Imidazopyrimidines	58-55-9	HMDB0001889	C07130	ko01100//Metabolic pathways;ko01110//Biosynthesis of secondary metabolites;ko01120//Microbial metabolism in diverse environments;ko00232//Caffeine metabolism	Biosynthesis of other secondary metabolites;Global and overview maps	Metabolism
Com_824_neg	6.33498e+07	5.67486e+07	1.05717e+07	1.07922e+07	6.00492e+07	1.0682e+07	-2.49097	0.00444512	0.0323776	1.1228	LPA 17:0	--	C20 H41 O7 P	5.853	423.25	--	--	--	-	-	-	-
Com_730_neg	6.42524e+07	5.04665e+07	5.61424e+06	9.99261e+06	5.73594e+07	7.80342e+06	-2.87785	0.0206414	0.0653198	1.11578	Salvinorin B	--	C21 H26 O7	7.409	389.164	--	--	--	-	-	-	-
Com_466_neg	1.02803e+08	9.83365e+07	5.32552e+07	5.42358e+07	1.0057e+08	5.37455e+07	-0.903979	0.00237585	0.0258003	1.09439	--	Neocnidilide	C12 H18 O2	5.961	239.129	Lactones	4567-33-3	HMDB0034450	-	-	-	-
Com_890_neg	5.73946e+07	5.42756e+07	1.36477e+07	1.26708e+07	5.58351e+07	1.31593e+07	-2.08509	0.00146317	0.0237004	1.04545	LPA 16:3	--	C19 H33 O7 P	6.217	403.197	--	--	--	-	-	-	-
Com_768_neg	3.23965e+07	3.0439e+07	7.20426e+07	7.59643e+07	3.14178e+07	7.40034e+07	1.23601	0.00263785	0.0271587	1.04371	8Z,11Z,14Z-Eicosatrienoic acid	--	C20 H34 O2	10.422	305.248	Fatty Acyls	1783-84-2	HMDB0002925	C03242	ko01100//Metabolic pathways;ko01040//Biosynthesis of unsaturated fatty acids;ko00591//Linoleic acid metabolism	Global and overview maps;Lipid metabolism	Metabolism
Com_878_neg	1.14816e+07	1.31098e+07	5.41288e+07	4.94577e+07	1.22957e+07	5.17933e+07	2.07461	0.00389841	0.0314861	1.00363	--	Arabidopyl ketoadipic acid	C15 H14 O9	5.357	337.057	--	--	--	-	-	-	-

## Sheet: NEG_CK-T3
index	CK-1	CK-2	T3-1	T3-2	control_mean	case_mean	log2_FC(case_mean/control_mean)	Pvalue	fdr	vip	MS2_name	MS1_name	formula	rtmin	mz	Class	CAS	HMDB	C_ID	Pathway	KEGG_B_class	KEGG_A_class
Com_9_neg	1.02584e+10	9.58118e+09	1.18554e+10	1.2367e+10	9.91977e+09	1.21112e+10	0.287965	0.0355112	0.0914039	8.35435	13(S)-HOTrE	--	C18 H30 O3	7.545	293.212	--	--	--	C16316	ko00592//alpha-Linolenic acid metabolism	Lipid metabolism	Metabolism
Com_53_neg	7.54195e+08	6.41313e+08	2.12843e+09	2.34457e+09	6.97754e+08	2.2365e+09	1.68045	0.00621966	0.0381639	7.13558	D-(+)-Malic acid	--	C4 H6 O5	1.521	133.014	Fatty Acyls	636-61-3	HMDB0031518	C00497	ko00650//Butanoate metabolism	Carbohydrate metabolism	Metabolism
Com_30_neg	2.78087e+09	2.56236e+09	3.84648e+09	3.58481e+09	2.67162e+09	3.71565e+09	0.475899	0.0256358	0.0747762	5.8418	12-Oxo phytodienoic acid	--	C18 H28 O3	7.189	291.197	--	--	--	-	-	-	-
Com_45_neg	3.54951e+08	3.49269e+08	1.0961e+09	1.13792e+09	3.5211e+08	1.11701e+09	1.66554	0.000760301	0.0221141	5.05473	N-Acetyl-L-phenylalanine	--	C11 H13 N O3	5.475	206.082	Carboxylic acids and derivatives	2018-61-3	HMDB0000512	C03519	ko00360//Phenylalanine metabolism	Amino acid metabolism	Metabolism
Com_68_neg	1.36272e+09	1.34903e+09	7.51677e+08	9.2893e+08	1.35587e+09	8.40303e+08	-0.690242	0.028463	0.0800249	4.11617	--	13-HPODE	C18 H32 O4	7.006	311.223	Fatty Acyls	33964-75-9	HMDB0003871	C04717	ko01100//Metabolic pathways;ko00591//Linoleic acid metabolism	Global and overview maps;Lipid metabolism	Metabolism
Com_80_neg	4.42088e+08	4.00742e+08	8.98238e+08	8.47502e+08	4.21415e+08	8.7287e+08	1.05053	0.00521329	0.035952	3.87965	Dihydroroseoside	--	C19 H32 O8	5.357	387.203	Fatty Acyls	142235-28-7	HMDB0040614	-	-	-	-
Com_208_neg	5.40326e+07	5.58824e+07	3.64334e+08	3.93403e+08	5.49575e+07	3.78869e+08	2.78531	0.00201554	0.0240497	3.28621	Fumaric acid	--	C4 H4 O4	1.715	115.003	Carboxylic acids and derivatives	110-17-8	HMDB0000134	C00122	ko01100//Metabolic pathways;ko01110//Biosynthesis of secondary metabolites;ko01120//Microbial metabolism in diverse environments;ko01130//Biosynthesis of antibiotics;ko00360//Phenylalanine metabolism;ko01200//Carbon metabolism;ko00350//Tyrosine metabolism;ko00250//Alanine, aspartate and glutamate metabolism;ko01220//Degradation of aromatic compounds;ko00220//Arginine biosynthesis;ko00760//Nicotin…	Amino acid metabolism;Carbohydrate metabolism;Energy metabolism;Global and overview maps;Metabolism of cofactors and vitamins	Metabolism
Com_126_neg	2.65554e+08	2.47954e+08	5.68547e+08	5.82333e+08	2.56754e+08	5.7544e+08	1.16428	0.00122807	0.0222654	3.26057	--	Ixoside	C16 H20 O11	5.059	387.093	--	--	--	-	-	-	-
Com_249_neg	5.71995e+07	5.37287e+07	3.0379e+08	2.49156e+08	5.54641e+07	2.76473e+08	2.31751	0.0149946	0.0565001	2.70861	PA (2:0/22:3)	--	C27 H47 O8 P	6.808	529.302	--	--	--	-	-	-	-
Com_156_neg	1.58059e+08	1.51805e+08	3.69818e+08	3.69583e+08	1.54932e+08	3.69701e+08	1.25472	0.000212184	0.0205357	2.68053	--	Tricin 5-O-hexoside derivative	C24 H22 O14	5.521	533.093	--	--	--	-	-	-	-
Com_152_neg	9.9899e+07	1.03587e+08	3.10573e+08	2.88303e+08	1.01743e+08	2.99438e+08	1.55733	0.0032437	0.0303993	2.57331	Bilobalide	--	C15 H18 O8	5.193	325.093	Prenol lipids	33570-04-6	HMDB0036735	-	-	-	-
Com_196_neg	6.59823e+07	6.41913e+07	2.65025e+08	2.51048e+08	6.50868e+07	2.58037e+08	1.98714	0.00133067	0.0222654	2.54241	Quercetin-3-O-beta-glucopyranosyl-6'-acetate	--	C23 H22 O13	5.417	505.099	--	--	--	-	-	-	-
Com_141_neg	2.36165e+08	2.13487e+08	4.20684e+08	4.16991e+08	2.24826e+08	4.18838e+08	0.89758	0.00348803	0.0322754	2.54146	Succinic acid	--	C4 H6 O4	2.549	117.019	Carboxylic acids and derivatives	110-15-6	HMDB0000254	C00042	ko01100//Metabolic pathways;ko01110//Biosynthesis of secondary metabolites;ko01120//Microbial metabolism in diverse environments;ko01130//Biosynthesis of antibiotics;ko00360//Phenylalanine metabolism;ko01200//Carbon metabolism;ko00350//Tyrosine metabolism;ko00250//Alanine, aspartate and glutamate metabolism;ko01220//Degradation of aromatic compounds;ko00630//Glyoxylate and dicarboxylate metabolis…	Amino acid metabolism;Carbohydrate metabolism;Energy metabolism;Global and overview maps;Metabolism of cofactors and vitamins	Metabolism
Com_207_neg	3.32456e+06	3.1615e+06	1.87963e+08	1.95485e+08	3.24303e+06	1.91724e+08	5.88555	0.000398047	0.0205357	2.51033	--	Przewaquinone A	C19 H18 O4	6.422	309.113	--	--	--	-	-	-	-
Com_102_neg	7.80554e+08	7.33151e+08	5.6183e+08	5.76287e+08	7.56853e+08	5.69059e+08	-0.411435	0.0169684	0.0602132	2.49651	Elaidic acid	--	C18 H34 O2	10.693	281.248	Fatty Acyls	112-79-8	HMDB0000573	-	-	-	-
Com_163_neg	4.61675e+08	4.51281e+08	2.93655e+08	2.87026e+08	4.56478e+08	2.9034e+08	-0.6528	0.00137373	0.0222654	2.3575	3-Hydroxysebacic acid	--	C10 H18 O5	5.582	217.108	Hydroxy acids and derivatives	73141-46-5	HMDB0000350	-	-	-	-
Com_321_neg	2.0033e+08	2.05414e+08	3.85683e+07	4.23839e+07	2.02872e+08	4.04761e+07	-2.32543	0.000382737	0.0205357	2.33135	PA (3:0/22:3)	--	C28 H49 O8 P	6.251	543.317	--	--	--	-	-	-	-
Com_193_neg	1.96928e+08	1.65137e+08	3.43039e+08	3.07996e+08	1.81033e+08	3.25517e+08	0.846485	0.0257779	0.0747762	2.17253	PI (2:0/20:4)	--	C31 H51 O13 P	5.907	661.286	--	--	--	-	-	-	-
Com_351_neg	1.81247e+08	1.80918e+08	4.46008e+07	4.14533e+07	1.81082e+08	4.3027e+07	-2.07333	0.000131342	0.0205357	2.14932	Parishin E	--	C19 H24 O13	4.957	459.115	--	--	--	-	-	-	-
Com_257_neg	6.45516e+07	7.5755e+07	2.09475e+08	1.92579e+08	7.01533e+07	2.01027e+08	1.5188	0.00594551	0.0381639	2.09304	Esculin	--	C15 H16 O9	5.027	339.072	Coumarins and derivatives	531-75-9	HMDB0030820	-	-	-	-
Com_381_neg	5.66613e+07	6.17718e+07	1.79571e+08	1.84269e+08	5.92166e+07	1.8192e+08	1.61923	0.000799221	0.0221141	2.02615	PI (2:0/22:3)	--	C33 H57 O13 P	6.624	691.354	--	--	--	-	-	-	-
Com_364_neg	1.61105e+08	1.71212e+08	5.18644e+07	4.99718e+07	1.66159e+08	5.09181e+07	-1.70631	0.00198444	0.0240497	1.95993	(卤)9(10)-DiHOME	--	C18 H34 O4	7.546	313.238	--	--	--	-	-	-	-
Com_426_neg	1.31325e+08	1.40418e+08	2.37535e+07	1.90354e+07	1.35871e+08	2.13944e+07	-2.66693	0.0019962	0.0240497	1.95294	MGDG (2:0/16:3)	--	C27 H44 O10	6.246	587.307	--	--	--	-	-	-	-
Com_567_neg	3.33268e+06	3.40827e+06	1.06589e+08	1.14459e+08	3.37048e+06	1.10524e+08	5.03526	0.00134594	0.0222654	1.89104	4,5-Dicaffeoylquinic acid	--	C25 H24 O12	5.317	515.119	Alcohols and polyols	57378-72-0	HMDB0030707	-	-	-	-
Com_325_neg	1.22795e+08	1.23864e+08	2.26823e+08	2.18696e+08	1.23329e+08	2.22759e+08	0.85297	0.00169492	0.0238117	1.82542	Gentiopicrin	--	C16 H20 O9	5.243	355.103	--	--	--	C09782	ko01110//Biosynthesis of secondary metabolites	Global and overview maps	Metabolism
Com_313_neg	2.18372e+08	2.05916e+08	1.17765e+08	1.27493e+08	2.12144e+08	1.22629e+08	-0.790741	0.00770388	0.0411061	1.73011	--	Azelaic acid	C9 H16 O4	5.875	187.097	Fatty Acyls	123-99-9	HMDB0000784	-	-	-	-
Com_405_neg	1.57072e+07	1.56316e+07	1.0796e+08	1.00068e+08	1.56694e+07	1.04014e+08	2.73076	0.00198928	0.0240497	1.72034	--	Plantagoside	C21 H22 O12	4.984	465.104	--	--	--	-	-	-	-
Com_148_neg	4.69518e+08	4.82514e+08	3.9064e+08	3.83632e+08	4.76016e+08	3.87136e+08	-0.298169	0.00682853	0.0390788	1.71436	3,8,9-trihydroxy-10-propyl-3,4,5,8,9,10-hexahydro-2H-oxecin-2-one	--	C12 H20 O5	5.685	243.124	--	--	--	-	-	-	-
Com_476_neg	2.59336e+07	2.35607e+07	9.90328e+07	1.11976e+08	2.47471e+07	1.05505e+08	2.09197	0.00657258	0.0381639	1.63483	--	2-Methylpentanedioic acid	C6 H10 O4	5.113	145.05	Fatty Acyls	617-62-9	HMDB0000422	-	-	-	-
Com_234_neg	3.84924e+07	3.50914e+07	1.11183e+08	1.16949e+08	3.67919e+07	1.14066e+08	1.63241	0.00187111	0.0239961	1.60458	--	D-Phenylalanine	C9 H11 N O2	5.475	164.071	--	--	--	C02265	ko00360//Phenylalanine metabolism	Amino acid metabolism	Metabolism
Com_759_neg	142381	127558	7.63172e+07	7.58856e+07	134970	7.61014e+07	9.13914	8.07809e-06	0.00590508	1.59503	Catechin	--	C15 H14 O6	5.016	289.072	Flavonoids	35323-91-2	HMDB0037954	-	-	-	-
Com_708_neg	6.88394e+06	7.57738e+06	8.32164e+07	8.0178e+07	7.23066e+06	8.16972e+07	3.49809	0.000437611	0.0205357	1.57981	--	3-O-p-coumaroyl shikimic acid O-hexoside	C22 H26 O12	5.412	481.136	--	--	--	-	-	-	-
Com_581_neg	9.91272e+07	9.36007e+07	2.52204e+07	2.37136e+07	9.6364e+07	2.4467e+07	-1.97766	0.00158321	0.0226927	1.55137	Mangostin	--	C24 H26 O6	5.013	409.172	Benzopyrans	1551491	HMDB0035796	-	-	-	-
Com_421_neg	2.29452e+07	2.1974e+07	9.00303e+07	9.67072e+07	2.24596e+07	9.33688e+07	2.05561	0.00225587	0.0258186	1.53692	Rutin	--	C27 H30 O16	5.373	609.146	Flavonoids	153-18-4	HMDB0003249	C05625	ko01100//Metabolic pathways;ko01110//Biosynthesis of secondary metabolites;ko00944//Flavone and flavonol biosynthesis	Biosynthesis of other secondary metabolites;Global and overview maps	Metabolism
Com_592_neg	3.13274e+07	3.03942e+07	1.05349e+08	9.23847e+07	3.08608e+07	9.88668e+07	1.67971	0.00900914	0.0443543	1.50593	MGDG (20:4/18:5)	--	C47 H72 O10	6.827	855.51	--	--	--	-	-	-	-
Com_143_neg	1.53367e+07	1.41885e+07	8.55979e+07	7.85761e+07	1.47626e+07	8.2087e+07	2.47521	0.00278063	0.0288523	1.50122	Quercetin-3尾-D-glucoside	--	C21 H20 O12	5.401	463.088	--	--	--	-	-	-	-
Com_643_neg	8.77333e+07	8.25127e+07	2.18722e+07	2.3972e+07	8.5123e+07	2.29221e+07	-1.89281	0.00203978	0.0240497	1.44386	MGDG (2:0/16:4)	--	C27 H42 O10	5.963	585.292	--	--	--	-	-	-	-
Com_632_neg	8.97062e+07	8.02189e+07	2.2657e+07	2.24933e+07	8.49625e+07	2.25752e+07	-1.91209	0.00573336	0.0377575	1.44381	1a,1b-Dihomo prostaglandin F2伪	--	C22 H38 O5	7.88	381.264	--	--	--	-	-	-	-
Com_472_neg	1.27986e+08	1.16007e+08	5.68656e+07	6.90383e+07	1.21996e+08	6.2952e+07	-0.954515	0.0202809	0.0670563	1.39914	Suberic acid	--	C8 H14 O4	5.551	173.082	Fatty Acyls	505-48-6	HMDB0000893	-	-	-	-
Com_824_neg	6.33498e+07	5.67486e+07	1.96599e+06	2.23372e+06	6.00492e+07	2.09986e+06	-4.83778	0.0032336	0.0303993	1.39275	LPA 17:0	--	C20 H41 O7 P	5.853	423.25	--	--	--	-	-	-	-
Com_441_neg	1.35098e+08	1.363e+08	7.74656e+07	8.16831e+07	1.35699e+08	7.95743e+07	-0.770031	0.00152294	0.0222654	1.37091	--	alpha-Zearalanol	C18 H26 O5	6.106	321.171	Macrolides and analogues	26538-44-3	HMDB0032702	-	-	-	-
Com_618_neg	8.02639e+07	8.93613e+07	2.82533e+07	2.87642e+07	8.48126e+07	2.85088e+07	-1.57287	0.00648381	0.0381639	1.36612	Orcinol gentiobioside	--	C19 H28 O12	5.302	447.151	--	--	--	-	-	-	-
Com_772_neg	1.8984e+07	1.6628e+07	7.44591e+07	7.26444e+07	1.7806e+07	7.35518e+07	2.0464	0.000710747	0.0221141	1.36569	PS (5:0/16:2)	--	C27 H48 N O10 P	8.395	576.302	--	--	--	-	-	-	-
Com_285_neg	1.45761e+08	1.38938e+08	1.89925e+08	2.09385e+08	1.42349e+08	1.99655e+08	0.488077	0.0308808	0.08202	1.35535	LPC 18:2	--	C26 H50 N O7 P	9.004	564.33	--	--	--	-	-	-	-
Com_642_neg	4.05624e+07	4.00465e+07	9.27685e+07	9.74483e+07	4.03045e+07	9.51084e+07	1.23863	0.00183998	0.0239961	1.35168	LPC 16:0	--	C24 H50 N O7 P	9.346	540.331	--	--	--	-	-	-	-
Com_659_neg	8.45696e+07	6.33536e+07	1.98916e+07	1.9214e+07	7.39616e+07	1.95528e+07	-1.9194	0.0360087	0.0923591	1.33127	Mevalonic acid	--	C6 H12 O4	5.066	147.066	Fatty Acyls	150-97-0	HMDB0000227	C00418	ko01100//Metabolic pathways;ko01110//Biosynthesis of secondary metabolites;ko01130//Biosynthesis of antibiotics;ko00900//Terpenoid backbone biosynthesis	Global and overview maps;Metabolism of terpenoids and polyketides	Metabolism
Com_241_neg	2.60152e+08	2.41396e+08	1.97128e+08	2.05558e+08	2.50774e+08	2.01343e+08	-0.316733	0.0406459	0.0980599	1.26887	Nystose	--	C24 H42 O21	5.445	355.104	Organooxygen compounds	13133-07-8	HMDB0039176	-	-	-	-
Com_688_neg	2.49519e+07	2.68587e+07	8.3852e+07	6.36903e+07	2.59053e+07	7.37711e+07	1.50981	0.0419557	0.100556	1.24697	GlcADG (22:3-18:5)	--	C49 H76 O11	6.835	839.516	--	--	--	-	-	-	-
Com_878_neg	1.14816e+07	1.31098e+07	5.79794e+07	5.85725e+07	1.22957e+07	5.8276e+07	2.24475	0.000354907	0.0205357	1.24092	--	Arabidopyl ketoadipic acid	C15 H14 O9	5.357	337.057	--	--	--	-	-	-	-
Com_935_neg	1.22296e+07	1.03927e+07	5.91571e+07	5.46805e+07	1.13111e+07	5.69188e+07	2.33116	0.00280235	0.0288523	1.23513	Gambogellic acid	--	C38 H44 O8	8.394	627.3	--	--	--	-	-	-	-
Com_151_neg	3.20851e+08	3.2692e+08	2.83267e+08	2.80731e+08	3.23885e+08	2.81999e+08	-0.199792	0.00610897	0.0381639	1.17763	LPC 18:1	--	C26 H52 N O7 P	9.362	566.346	--	--	--	-	-	-	-
Com_358_neg	1.79353e+08	1.62364e+08	1.28401e+08	1.3316e+08	1.70858e+08	1.30781e+08	-0.385651	0.045188	0.105202	1.13962	--	Aminophylline	C16 H24 N10 O4	5.569	419.192	Imidazopyrimidines	58-55-9	HMDB0001889	C07130	ko01100//Metabolic pathways;ko01110//Biosynthesis of secondary metabolites;ko01120//Microbial metabolism in diverse environments;ko00232//Caffeine metabolism	Biosynthesis of other secondary metabolites;Global and overview maps	Metabolism
Com_455_neg	1.15629e+08	9.88056e+07	1.48236e+08	1.47301e+08	1.07217e+08	1.47769e+08	0.462804	0.0405529	0.0980599	1.13605	12-oxo Leukotriene B4	--	C20 H30 O4	7.275	333.205	--	--	--	-	-	-	-
Com_943_neg	5.36117e+07	5.0361e+07	1.54851e+07	1.12094e+07	5.19864e+07	1.33473e+07	-1.96159	0.00479599	0.0348344	1.13416	PE (3:0/15:1)	--	C23 H44 N O8 P	8.681	492.273	--	--	--	-	-	-	-
Com_1074_neg	4.49975e+07	3.55814e+07	2.20168e+06	2.19489e+06	4.02894e+07	2.19828e+06	-4.19595	0.0149357	0.0565001	1.12426	Dihydrocucurbitacin F	--	C30 H48 O7	8.668	519.33	--	--	--	-	-	-	-
Com_909_neg	5.60323e+07	4.63561e+07	1.47222e+07	1.66412e+07	5.11942e+07	1.56817e+07	-1.7069	0.0187497	0.0646509	1.08457	MGDG (4:0/22:3)	--	C35 H60 O10	6.107	685.416	--	--	--	-	-	-	-
Com_541_neg	1.09543e+08	1.05034e+08	7.30481e+07	7.28519e+07	1.07289e+08	7.295e+07	-0.556519	0.00429177	0.0348344	1.07162	2-Hydroxyvaleric acid	--	C5 H10 O3	5.451	117.055	Fatty Acyls	617-31-2	HMDB0001863	-	-	-	-
Com_866_neg	5.9125e+07	5.76187e+07	2.50214e+07	2.38583e+07	5.83719e+07	2.44399e+07	-1.25604	0.000785438	0.0221141	1.06559	PI (3:0/18:4)	--	C30 H49 O13 P	5.891	629.282	--	--	--	-	-	-	-
Com_1157_neg	4.07912e+07	3.64299e+07	6.10597e+06	6.40554e+06	3.86105e+07	6.25576e+06	-2.62574	0.00453299	0.0348344	1.04033	4-Oxoproline	--	C5 H7 N O3	1.445	128.035	--	--	--	C01877	ko00330//Arginine and proline metabolism	Amino acid metabolism	Metabolism
Com_730_neg	6.42524e+07	5.04665e+07	2.18863e+07	2.64181e+07	5.73594e+07	2.41522e+07	-1.24788	0.0445746	0.104825	1.03783	Salvinorin B	--	C21 H26 O7	7.409	389.164	--	--	--	-	-	-	-
Com_1109_neg	4.31628e+07	4.1088e+07	1.12675e+07	1.11368e+07	4.21254e+07	1.12021e+07	-1.91092	0.00112801	0.0222654	1.01778	16伪-Hydroxyestrone	--	C18 H22 O3	5.169	285.146	--	--	--	-	-	-	-
Com_1213_neg	3.63079e+07	3.73122e+07	5.88963e+06	6.60397e+06	3.68101e+07	6.2468e+06	-2.55891	0.000406278	0.0205357	1.01136	MGDG (2:0/16:2)	--	C27 H46 O10	6.256	589.323	--	--	--	-	-	-	-
Com_911_neg	5.56451e+07	5.44907e+07	2.7053e+07	2.17956e+07	5.50679e+07	2.44243e+07	-1.1729	0.0076254	0.0410955	1.00718	3-methyl-4-[2-(2-methylphenyl)hydrazono]-4,5-dihydro-1H-pyrazol-5-one	--	C11 H12 N4 O	5.418	215.092	--	--	--	-	-	-	-
Com_1162_neg	3.27319e+06	1.04806e+07	3.71961e+07	3.717e+07	6.87689e+06	3.71831e+07	2.43482	0.0138467	0.0553111	1.00327	8-O-Acetylharpagide	--	C17 H26 O11	5.091	387.129	--	--	--	-	-	-	-

## Sheet: NEG_CK-T4
index	CK-1	CK-2	T4-1	T4-2	control_mean	case_mean	log2_FC(case_mean/control_mean)	Pvalue	fdr	vip	MS2_name	MS1_name	formula	rtmin	mz	Class	CAS	HMDB	C_ID	Pathway	KEGG_B_class	KEGG_A_class
Com_24_neg	4.27833e+09	4.92481e+09	2.37594e+09	2.32606e+09	4.60157e+09	2.351e+09	-0.968851	0.0201267	0.0791893	10.0629	(+/-)9-HpODE	--	C18 H32 O4	7.274	311.223	--	--	--	-	-	-	-
Com_80_neg	4.42088e+08	4.00742e+08	9.30154e+08	9.37514e+08	4.21415e+08	9.33834e+08	1.14792	0.00167493	0.0372031	4.84163	Dihydroroseoside	--	C19 H32 O8	5.357	387.203	Fatty Acyls	142235-28-7	HMDB0040614	-	-	-	-
Com_68_neg	1.36272e+09	1.34903e+09	8.55428e+08	9.32764e+08	1.35587e+09	8.94096e+08	-0.600722	0.00715432	0.0493378	4.58264	--	13-HPODE	C18 H32 O4	7.006	311.223	Fatty Acyls	33964-75-9	HMDB0003871	C04717	ko01100//Metabolic pathways;ko00591//Linoleic acid metabolism	Global and overview maps;Lipid metabolism	Metabolism
Com_50_neg	3.03074e+08	3.14145e+08	8.07572e+08	6.93224e+08	3.0861e+08	7.50398e+08	1.28187	0.0164884	0.0710982	4.46215	DL-Malic acid	--	C4 H6 O5	1.692	133.014	Hydroxy acids and derivatives	6915-15-7	HMDB0000744	-	-	-	-
Com_126_neg	2.65554e+08	2.47954e+08	6.15754e+08	6.04672e+08	2.56754e+08	6.10213e+08	1.24893	0.00086446	0.0371718	4.0225	--	Ixoside	C16 H20 O11	5.059	387.093	--	--	--	-	-	-	-
Com_102_neg	7.80554e+08	7.33151e+08	5.11843e+08	5.01096e+08	7.56853e+08	5.0647e+08	-0.579536	0.0092899	0.0546136	3.36666	Elaidic acid	--	C18 H34 O2	10.693	281.248	Fatty Acyls	112-79-8	HMDB0000573	-	-	-	-
Com_158_neg	2.57849e+08	2.41614e+08	5.09396e+08	4.56774e+08	2.49732e+08	4.83085e+08	0.951899	0.0136387	0.0660258	3.24901	LPS 18:2	--	C24 H44 N O9 P	10.281	520.268	--	--	--	-	-	-	-
Com_152_neg	9.9899e+07	1.03587e+08	2.88028e+08	3.01863e+08	1.01743e+08	2.94946e+08	1.53552	0.00137015	0.0372031	2.97155	Bilobalide	--	C15 H18 O8	5.193	325.093	Prenol lipids	33570-04-6	HMDB0036735	-	-	-	-
Com_151_neg	3.20851e+08	3.2692e+08	5.10265e+08	5.05965e+08	3.23885e+08	5.08115e+08	0.649673	0.000407275	0.0251491	2.90347	LPC 18:1	--	C26 H52 N O7 P	9.362	566.346	--	--	--	-	-	-	-
Com_351_neg	1.81247e+08	1.80918e+08	1.39054e+07	1.9123e+07	1.81082e+08	1.65142e+07	-3.45486	0.000252203	0.0251491	2.74485	Parishin E	--	C19 H24 O13	4.957	459.115	--	--	--	-	-	-	-
Com_321_neg	2.0033e+08	2.05414e+08	5.55952e+07	5.18558e+07	2.02872e+08	5.37255e+07	-1.91689	0.000447248	0.0251491	2.61301	PA (3:0/22:3)	--	C28 H49 O8 P	6.251	543.317	--	--	--	-	-	-	-
Com_249_neg	5.71995e+07	5.37287e+07	1.92971e+08	2.00151e+08	5.54641e+07	1.96561e+08	1.82535	0.000797663	0.0364432	2.54082	PA (2:0/22:3)	--	C27 H47 O8 P	6.808	529.302	--	--	--	-	-	-	-
Com_285_neg	1.45761e+08	1.38938e+08	2.54589e+08	2.48211e+08	1.42349e+08	2.514e+08	0.820552	0.00182875	0.0372031	2.23349	LPC 18:2	--	C26 H50 N O7 P	9.004	564.33	--	--	--	-	-	-	-
Com_238_neg	1.08157e+08	9.60434e+07	1.94022e+08	2.17863e+08	1.021e+08	2.05942e+08	1.01225	0.016179	0.0703978	2.16312	Ranaconitine	--	C32 H44 N2 O9	6.379	645.292	--	--	--	-	-	-	-
Com_426_neg	1.31325e+08	1.40418e+08	3.47415e+07	3.86772e+07	1.35871e+08	3.67093e+07	-1.88802	0.00248696	0.0372031	2.12935	MGDG (2:0/16:3)	--	C27 H44 O10	6.246	587.307	--	--	--	-	-	-	-
Com_196_neg	6.59823e+07	6.41913e+07	1.55795e+08	1.56457e+08	6.50868e+07	1.56126e+08	1.26228	0.000109946	0.0251491	2.04176	Quercetin-3-O-beta-glucopyranosyl-6'-acetate	--	C23 H22 O13	5.417	505.099	--	--	--	-	-	-	-
Com_146_neg	4.21296e+08	4.09796e+08	4.95052e+08	5.22567e+08	4.15546e+08	5.0881e+08	0.292117	0.0246204	0.088531	2.04097	--	Methylenesuccinic acid	C5 H6 O4	1.402	129.019	Fatty Acyls	97-65-4	HMDB0002092	C00490	ko00660//C5-Branched dibasic acid metabolism	Carbohydrate metabolism	Metabolism
Com_45_neg	3.54951e+08	3.49269e+08	2.65575e+08	2.62583e+08	3.5211e+08	2.64079e+08	-0.415058	0.00132753	0.0372031	2.00556	N-Acetyl-L-phenylalanine	--	C11 H13 N O3	5.475	206.082	Carboxylic acids and derivatives	2018-61-3	HMDB0000512	C03519	ko00360//Phenylalanine metabolism	Amino acid metabolism	Metabolism
Com_240_neg	1.82555e+08	1.84032e+08	2.74846e+08	2.67038e+08	1.83293e+08	2.70942e+08	0.563831	0.00204845	0.0372031	2.00145	Dihydroartemisinin	--	C15 H24 O5	5.657	283.155	Prenol lipids	81496-81-3	HMDB0060593	-	-	-	-
Com_257_neg	6.45516e+07	7.5755e+07	1.57016e+08	1.52122e+08	7.01533e+07	1.54569e+08	1.13967	0.00520276	0.0432184	1.95981	Esculin	--	C15 H16 O9	5.027	339.072	Coumarins and derivatives	531-75-9	HMDB0030820	-	-	-	-
Com_325_neg	1.22795e+08	1.23864e+08	2.01838e+08	2.0993e+08	1.23329e+08	2.05884e+08	0.739318	0.00243485	0.0372031	1.94136	Gentiopicrin	--	C16 H20 O9	5.243	355.103	--	--	--	C09782	ko01110//Biosynthesis of secondary metabolites	Global and overview maps	Metabolism
Com_381_neg	5.66613e+07	6.17718e+07	1.31736e+08	1.46267e+08	5.92166e+07	1.39001e+08	1.23102	0.00918986	0.0546136	1.90122	PI (2:0/22:3)	--	C33 H57 O13 P	6.624	691.354	--	--	--	-	-	-	-
Com_364_neg	1.61105e+08	1.71212e+08	9.0903e+07	9.1757e+07	1.66159e+08	9.133e+07	-0.863403	0.00456192	0.040622	1.84811	(卤)9(10)-DiHOME	--	C18 H34 O4	7.546	313.238	--	--	--	-	-	-	-
Com_567_neg	3.33268e+06	3.40827e+06	7.28362e+07	7.47257e+07	3.37048e+06	7.37809e+07	4.45222	0.000180264	0.0251491	1.79528	4,5-Dicaffeoylquinic acid	--	C25 H24 O12	5.317	515.119	Alcohols and polyols	57378-72-0	HMDB0030707	-	-	-	-
Com_148_neg	4.69518e+08	4.82514e+08	3.93703e+08	4.15119e+08	4.76016e+08	4.04411e+08	-0.235188	0.0292611	0.0951459	1.78673	3,8,9-trihydroxy-10-propyl-3,4,5,8,9,10-hexahydro-2H-oxecin-2-one	--	C12 H20 O5	5.685	243.124	--	--	--	-	-	-	-
Com_163_neg	4.61675e+08	4.51281e+08	3.8357e+08	3.90931e+08	4.56478e+08	3.8725e+08	-0.237278	0.00835718	0.0512954	1.77197	3-Hydroxysebacic acid	--	C10 H18 O5	5.582	217.108	Hydroxy acids and derivatives	73141-46-5	HMDB0000350	-	-	-	-
Com_581_neg	9.91272e+07	9.36007e+07	2.97053e+07	2.62097e+07	9.6364e+07	2.79575e+07	-1.78526	0.00227677	0.0372031	1.76689	Mangostin	--	C24 H26 O6	5.013	409.172	Benzopyrans	1551491	HMDB0035796	-	-	-	-
Com_262_neg	1.48635e+08	1.35183e+08	1.9917e+08	2.19782e+08	1.41909e+08	2.09476e+08	0.561818	0.0316114	0.098033	1.73158	Picroside III	--	C25 H30 O13	5.522	537.161	--	--	--	-	-	-	-
Com_659_neg	8.45696e+07	6.33536e+07	1.03865e+07	1.42681e+07	7.39616e+07	1.23273e+07	-2.58492	0.0292763	0.0951459	1.65247	Mevalonic acid	--	C6 H12 O4	5.066	147.066	Fatty Acyls	150-97-0	HMDB0000227	C00418	ko01100//Metabolic pathways;ko01110//Biosynthesis of secondary metabolites;ko01130//Biosynthesis of antibiotics;ko00900//Terpenoid backbone biosynthesis	Global and overview maps;Metabolism of terpenoids and polyketides	Metabolism
Com_175_neg	2.60552e+08	2.54896e+08	3.16355e+08	3.1853e+08	2.57724e+08	3.17443e+08	0.300671	0.0025643	0.03749	1.65216	2-Propylglutaric acid	--	C8 H14 O4	5.653	173.082	Fatty Acyls	-	HMDB0060684	-	-	-	-
Com_643_neg	8.77333e+07	8.25127e+07	2.49121e+07	2.66881e+07	8.5123e+07	2.58001e+07	-1.72217	0.00215325	0.0372031	1.64571	MGDG (2:0/16:4)	--	C27 H42 O10	5.963	585.292	--	--	--	-	-	-	-
Com_592_neg	3.13274e+07	3.03942e+07	9.39012e+07	8.38848e+07	3.08608e+07	8.8893e+07	1.52629	0.00742892	0.0495431	1.62472	MGDG (20:4/18:5)	--	C47 H72 O10	6.827	855.51	--	--	--	-	-	-	-
Com_632_neg	8.97062e+07	8.02189e+07	2.3005e+07	3.1882e+07	8.49625e+07	2.74435e+07	-1.63036	0.0125169	0.0628348	1.61183	1a,1b-Dihomo prostaglandin F2伪	--	C22 H38 O5	7.88	381.264	--	--	--	-	-	-	-
Com_421_neg	2.29452e+07	2.1974e+07	7.79034e+07	7.4003e+07	2.24596e+07	7.59532e+07	1.75778	0.00140851	0.0372031	1.56432	Rutin	--	C27 H30 O16	5.373	609.146	Flavonoids	153-18-4	HMDB0003249	C05625	ko01100//Metabolic pathways;ko01110//Biosynthesis of secondary metabolites;ko00944//Flavone and flavonol biosynthesis	Biosynthesis of other secondary metabolites;Global and overview maps	Metabolism
Com_472_neg	1.27986e+08	1.16007e+08	6.929e+07	6.7174e+07	1.21996e+08	6.8232e+07	-0.838318	0.0125563	0.0628348	1.55724	Suberic acid	--	C8 H14 O4	5.551	173.082	Fatty Acyls	505-48-6	HMDB0000893	-	-	-	-
Com_852_neg	6.03202e+07	5.47915e+07	4.21868e+06	5.36851e+06	5.75558e+07	4.79359e+06	-3.58578	0.00285151	0.0390064	1.55134	--	Octanedioic acid	C8 H14 O4	5.636	393.178	Fatty Acyls	505-48-6	HMDB0000893	-	-	-	-
Com_688_neg	2.49519e+07	2.68587e+07	7.5412e+07	8.19549e+07	2.59053e+07	7.86835e+07	1.60281	0.00414252	0.0404657	1.55066	GlcADG (22:3-18:5)	--	C49 H76 O11	6.835	839.516	--	--	--	-	-	-	-
Com_501_neg	1.05623e+08	9.98098e+07	5.72363e+07	4.63323e+07	1.02716e+08	5.17843e+07	-0.98808	0.0143982	0.0683446	1.51456	4-((5-(4-Nitrophenyl)oxazol-2-yl)amino)benzonitrile	--	C16 H10 N4 O3	5.26	305.07	--	--	--	-	-	-	-
Com_618_neg	8.02639e+07	8.93613e+07	3.47826e+07	3.44192e+07	8.48126e+07	3.46009e+07	-1.29347	0.00811982	0.0511748	1.51148	Orcinol gentiobioside	--	C19 H28 O12	5.302	447.151	--	--	--	-	-	-	-
Com_503_neg	6.00794e+07	5.12743e+07	1.02194e+08	1.0849e+08	5.56768e+07	1.05342e+08	0.919931	0.0116672	0.0613575	1.50015	--	Sinapoyl O-hexoside	C17 H22 O10	5.282	385.114	--	--	--	-	-	-	-
Com_156_neg	1.58059e+08	1.51805e+08	2.01126e+08	2.05329e+08	1.54932e+08	2.03227e+08	0.391458	0.00602962	0.0459131	1.48329	--	Tricin 5-O-hexoside derivative	C24 H22 O14	5.521	533.093	--	--	--	-	-	-	-
Com_358_neg	1.79353e+08	1.62364e+08	1.26036e+08	1.24579e+08	1.70858e+08	1.25308e+08	-0.447322	0.0332913	0.100979	1.41717	--	Aminophylline	C16 H24 N10 O4	5.569	419.192	Imidazopyrimidines	58-55-9	HMDB0001889	C07130	ko01100//Metabolic pathways;ko01110//Biosynthesis of secondary metabolites;ko01120//Microbial metabolism in diverse environments;ko00232//Caffeine metabolism	Biosynthesis of other secondary metabolites;Global and overview maps	Metabolism
Com_890_neg	5.73946e+07	5.42756e+07	1.50344e+07	1.67016e+07	5.58351e+07	1.5868e+07	-1.81505	0.0019518	0.0372031	1.35104	LPA 16:3	--	C19 H33 O7 P	6.217	403.197	--	--	--	-	-	-	-
Com_476_neg	2.59336e+07	2.35607e+07	5.97221e+07	6.59674e+07	2.47471e+07	6.28447e+07	1.34453	0.00760066	0.0496078	1.31572	--	2-Methylpentanedioic acid	C6 H10 O4	5.113	145.05	Fatty Acyls	617-62-9	HMDB0000422	-	-	-	-
Com_1074_neg	4.49975e+07	3.55814e+07	1.8215e+06	2.1643e+06	4.02894e+07	1.9929e+06	-4.33746	0.0147986	0.0684331	1.31276	Dihydrocucurbitacin F	--	C30 H48 O7	8.668	519.33	--	--	--	-	-	-	-
Com_878_neg	1.14816e+07	1.31098e+07	4.66659e+07	5.11841e+07	1.22957e+07	4.8925e+07	1.99242	0.00427029	0.0404657	1.29169	--	Arabidopyl ketoadipic acid	C15 H14 O9	5.357	337.057	--	--	--	-	-	-	-
Com_861_neg	5.56415e+07	5.12265e+07	1.95904e+07	1.90161e+07	5.3434e+07	1.93033e+07	-1.46891	0.00422694	0.0404657	1.24661	Dodecanedioic acid	--	C12 H22 O4	6.382	229.144	Fatty Acyls	6402-36-4	HMDB0000933	-	-	-	-
Com_208_neg	5.40326e+07	5.58824e+07	8.68642e+07	8.88212e+07	5.49575e+07	8.78427e+07	0.676606	0.00167218	0.0372031	1.22557	Fumaric acid	--	C4 H4 O4	1.715	115.003	Carboxylic acids and derivatives	110-17-8	HMDB0000134	C00122	ko01100//Metabolic pathways;ko01110//Biosynthesis of secondary metabolites;ko01120//Microbial metabolism in diverse environments;ko01130//Biosynthesis of antibiotics;ko00360//Phenylalanine metabolism;ko01200//Carbon metabolism;ko00350//Tyrosine metabolism;ko00250//Alanine, aspartate and glutamate metabolism;ko01220//Degradation of aromatic compounds;ko00220//Arginine biosynthesis;ko00760//Nicotin…	Amino acid metabolism;Carbohydrate metabolism;Energy metabolism;Global and overview maps;Metabolism of cofactors and vitamins	Metabolism
Com_143_neg	1.53367e+07	1.41885e+07	4.55867e+07	4.53594e+07	1.47626e+07	4.54731e+07	1.62307	0.000363014	0.0251491	1.18585	Quercetin-3尾-D-glucoside	--	C21 H20 O12	5.401	463.088	--	--	--	-	-	-	-
Com_943_neg	5.36117e+07	5.0361e+07	2.22147e+07	2.0656e+07	5.19864e+07	2.14354e+07	-1.27814	0.00346308	0.0391905	1.17994	PE (3:0/15:1)	--	C23 H44 N O8 P	8.681	492.273	--	--	--	-	-	-	-
Com_441_neg	1.35098e+08	1.363e+08	1.08689e+08	1.04946e+08	1.35699e+08	1.06817e+08	-0.345263	0.00459998	0.040622	1.14727	--	alpha-Zearalanol	C18 H26 O5	6.106	321.171	Macrolides and analogues	26538-44-3	HMDB0032702	-	-	-	-
Com_935_neg	1.22296e+07	1.03927e+07	3.79836e+07	4.1387e+07	1.13111e+07	3.96853e+07	1.81086	0.00461235	0.040622	1.1373	Gambogellic acid	--	C38 H44 O8	8.394	627.3	--	--	--	-	-	-	-
Com_1213_neg	3.63079e+07	3.73122e+07	8.30098e+06	1.13008e+07	3.68101e+07	9.80088e+06	-1.90912	0.00341205	0.0391905	1.11063	MGDG (2:0/16:2)	--	C27 H46 O10	6.256	589.323	--	--	--	-	-	-	-
Com_1109_neg	4.31628e+07	4.1088e+07	1.69556e+07	1.61427e+07	4.21254e+07	1.65492e+07	-1.34793	0.00189241	0.0372031	1.08063	16伪-Hydroxyestrone	--	C18 H22 O3	5.169	285.146	--	--	--	-	-	-	-
Com_1002_neg	4.9652e+07	4.7714e+07	2.35556e+07	2.31092e+07	4.8683e+07	2.33324e+07	-1.06108	0.00153507	0.0372031	1.0761	--	Prohydrojasmon	C15 H26 O3	6.896	253.181	--	--	--	-	-	-	-
Com_708_neg	6.88394e+06	7.57738e+06	3.26397e+07	2.99551e+07	7.23066e+06	3.12974e+07	2.11384	0.00330187	0.0391905	1.0481	--	3-O-p-coumaroyl shikimic acid O-hexoside	C22 H26 O12	5.412	481.136	--	--	--	-	-	-	-
Com_831_neg	4.83001e+07	5.29769e+07	2.65676e+07	2.74406e+07	5.06385e+07	2.70041e+07	-0.907055	0.00997882	0.0565466	1.03619	8-Prenylnaringenin	--	C20 H20 O5	5.058	339.129	--	--	--	-	-	-	-
Com_541_neg	1.09543e+08	1.05034e+08	8.41956e+07	8.40574e+07	1.07289e+08	8.41265e+07	-0.350867	0.00935208	0.0546136	1.02399	2-Hydroxyvaleric acid	--	C5 H10 O3	5.451	117.055	Fatty Acyls	617-31-2	HMDB0001863	-	-	-	-
Com_1086_neg	2.41865e+07	1.90345e+07	4.25693e+07	4.59222e+07	2.16105e+07	4.42458e+07	1.03381	0.017942	0.0745205	1.00974	DGDG (18:4/20:5)	--	C53 H82 O15	6.645	1017.56	--	--	--	-	-	-	-

## Sheet: NEG_CK-T5
index	CK-1	CK-2	T5-1	T5-2	control_mean	case_mean	log2_FC(case_mean/control_mean)	Pvalue	fdr	vip	MS2_name	MS1_name	formula	rtmin	mz	Class	CAS	HMDB	C_ID	Pathway	KEGG_B_class	KEGG_A_class
Com_24_neg	4.27833e+09	4.92481e+09	2.49867e+09	2.52654e+09	4.60157e+09	2.51261e+09	-0.872942	0.0231578	0.0714362	8.13203	(+/-)9-HpODE	--	C18 H32 O4	7.274	311.223	--	--	--	-	-	-	-
Com_30_neg	2.78087e+09	2.56236e+09	4.37376e+09	4.21443e+09	2.67162e+09	4.2941e+09	0.68464	0.00687395	0.0458935	7.22349	12-Oxo phytodienoic acid	--	C18 H28 O3	7.189	291.197	--	--	--	-	-	-	-
Com_11_neg	7.9061e+09	8.18739e+09	6.7138e+09	6.57469e+09	8.04675e+09	6.64425e+09	-0.2763	0.0122857	0.0557424	6.69906	(卤)9-HpODE	--	C18 H32 O4	7.904	311.223	--	--	--	-	-	-	-
Com_18_neg	3.68645e+09	3.71654e+09	4.77743e+09	5.18837e+09	3.70149e+09	4.9829e+09	0.428878	0.0248883	0.0736574	6.36006	LPG 16:0	--	C22 H45 O9 P	10.195	483.272	--	--	--	-	-	-	-
Com_21_neg	4.63524e+09	4.26212e+09	5.38041e+09	5.60087e+09	4.44868e+09	5.49064e+09	0.303598	0.0406325	0.101373	5.69273	2-Oxoglutaric acid	--	C5 H6 O5	1.402	191.019	Keto acids and derivatives	328-50-7	HMDB0000208	C00026	ko01100//Metabolic pathways;ko01110//Biosynthesis of secondary metabolites;ko01120//Microbial metabolism in diverse environments;ko01130//Biosynthesis of antibiotics;ko01230//Biosynthesis of amino acids;ko01200//Carbon metabolism;ko01210//2-Oxocarboxylic acid metabolism;ko00250//Alanine, aspartate and glutamate metabolism;ko00220//Arginine biosynthesis;ko00630//Glyoxylate and dicarboxylate metabo…	Amino acid metabolism;Carbohydrate metabolism;Global and overview maps;Metabolism of other amino acids	Metabolism
Com_80_neg	4.42088e+08	4.00742e+08	1.29663e+09	1.27391e+09	4.21415e+08	1.28527e+09	1.60876	0.000744752	0.0237136	5.28631	Dihydroroseoside	--	C19 H32 O8	5.357	387.203	Fatty Acyls	142235-28-7	HMDB0040614	-	-	-	-
Com_23_neg	4.02566e+09	3.65648e+09	2.94545e+09	2.94878e+09	3.84107e+09	2.94711e+09	-0.382206	0.0400935	0.100716	5.26588	Corchorifatty acid F	--	C18 H32 O5	6.135	327.217	Fatty Acyls	95341-44-9	HMDB0035919	-	-	-	-
Com_68_neg	1.36272e+09	1.34903e+09	7.32305e+08	8.39197e+08	1.35587e+09	7.85751e+08	-0.78708	0.00881449	0.0491224	4.27627	--	13-HPODE	C18 H32 O4	7.006	311.223	Fatty Acyls	33964-75-9	HMDB0003871	C04717	ko01100//Metabolic pathways;ko00591//Linoleic acid metabolism	Global and overview maps;Lipid metabolism	Metabolism
Com_143_neg	1.53367e+07	1.41885e+07	5.49329e+08	5.46039e+08	1.47626e+07	5.47684e+08	5.21332	1.06939e-05	0.00781723	4.15323	Quercetin-3尾-D-glucoside	--	C21 H20 O12	5.401	463.088	--	--	--	-	-	-	-
Com_102_neg	7.80554e+08	7.33151e+08	3.97924e+08	3.85829e+08	7.56853e+08	3.91877e+08	-0.949612	0.00446157	0.0420079	3.42855	Elaidic acid	--	C18 H34 O2	10.693	281.248	Fatty Acyls	112-79-8	HMDB0000573	-	-	-	-
Com_156_neg	1.58059e+08	1.51805e+08	5.26259e+08	5.10194e+08	1.54932e+08	5.18226e+08	1.74195	0.000562477	0.0237136	3.42823	--	Tricin 5-O-hexoside derivative	C24 H22 O14	5.521	533.093	--	--	--	-	-	-	-
Com_196_neg	6.59823e+07	6.41913e+07	3.92799e+08	3.8728e+08	6.50868e+07	3.9004e+08	2.58319	7.96964e-05	0.0139415	3.24303	Quercetin-3-O-beta-glucopyranosyl-6'-acetate	--	C23 H22 O13	5.417	505.099	--	--	--	-	-	-	-
Com_208_neg	5.40326e+07	5.58824e+07	2.62897e+08	2.61805e+08	5.49575e+07	2.62351e+08	2.25511	2.6818e-05	0.00980199	2.59083	Fumaric acid	--	C4 H4 O4	1.715	115.003	Carboxylic acids and derivatives	110-17-8	HMDB0000134	C00122	ko01100//Metabolic pathways;ko01110//Biosynthesis of secondary metabolites;ko01120//Microbial metabolism in diverse environments;ko01130//Biosynthesis of antibiotics;ko00360//Phenylalanine metabolism;ko01200//Carbon metabolism;ko00350//Tyrosine metabolism;ko00250//Alanine, aspartate and glutamate metabolism;ko01220//Degradation of aromatic compounds;ko00220//Arginine biosynthesis;ko00760//Nicotin…	Amino acid metabolism;Carbohydrate metabolism;Energy metabolism;Global and overview maps;Metabolism of cofactors and vitamins	Metabolism
Com_257_neg	6.45516e+07	7.5755e+07	2.84005e+08	2.68629e+08	7.01533e+07	2.76317e+08	1.97774	0.00212225	0.0310272	2.58013	Esculin	--	C15 H16 O9	5.027	339.072	Coumarins and derivatives	531-75-9	HMDB0030820	-	-	-	-
Com_238_neg	1.08157e+08	9.60434e+07	2.99498e+08	3.14722e+08	1.021e+08	3.0711e+08	1.58877	0.00224402	0.0321643	2.57347	Ranaconitine	--	C32 H44 N2 O9	6.379	645.292	--	--	--	-	-	-	-
Com_163_neg	4.61675e+08	4.51281e+08	2.70437e+08	2.54532e+08	4.56478e+08	2.62484e+08	-0.798314	0.00238964	0.033513	2.50264	3-Hydroxysebacic acid	--	C10 H18 O5	5.582	217.108	Hydroxy acids and derivatives	73141-46-5	HMDB0000350	-	-	-	-
Com_193_neg	1.96928e+08	1.65137e+08	3.40759e+08	3.80561e+08	1.81033e+08	3.6066e+08	0.994393	0.0195186	0.0680124	2.38866	PI (2:0/20:4)	--	C31 H51 O13 P	5.907	661.286	--	--	--	-	-	-	-
Com_126_neg	2.65554e+08	2.47954e+08	4.18206e+08	4.13258e+08	2.56754e+08	4.15732e+08	0.695268	0.00328976	0.0381717	2.26516	--	Ixoside	C16 H20 O11	5.059	387.093	--	--	--	-	-	-	-
Com_45_neg	3.54951e+08	3.49269e+08	2.09186e+08	1.97632e+08	3.5211e+08	2.03409e+08	-0.791644	0.00186916	0.0297034	2.19173	N-Acetyl-L-phenylalanine	--	C11 H13 N O3	5.475	206.082	Carboxylic acids and derivatives	2018-61-3	HMDB0000512	C03519	ko00360//Phenylalanine metabolism	Amino acid metabolism	Metabolism
Com_351_neg	1.81247e+08	1.80918e+08	3.72388e+07	3.38194e+07	1.81082e+08	3.55291e+07	-2.34957	0.000139221	0.0139415	2.17039	Parishin E	--	C19 H24 O13	4.957	459.115	--	--	--	-	-	-	-
Com_152_neg	9.9899e+07	1.03587e+08	2.41445e+08	2.33922e+08	1.01743e+08	2.37684e+08	1.22412	0.000948409	0.0237136	2.09648	Bilobalide	--	C15 H18 O8	5.193	325.093	Prenol lipids	33570-04-6	HMDB0036735	-	-	-	-
Com_421_neg	2.29452e+07	2.1974e+07	1.52259e+08	1.54857e+08	2.24596e+07	1.53558e+08	2.77338	0.000111917	0.0139415	2.05987	Rutin	--	C27 H30 O16	5.373	609.146	Flavonoids	153-18-4	HMDB0003249	C05625	ko01100//Metabolic pathways;ko01110//Biosynthesis of secondary metabolites;ko00944//Flavone and flavonol biosynthesis	Biosynthesis of other secondary metabolites;Global and overview maps	Metabolism
Com_141_neg	2.36165e+08	2.13487e+08	3.54539e+08	3.50664e+08	2.24826e+08	3.52601e+08	0.649226	0.00800779	0.04798	2.02619	Succinic acid	--	C4 H6 O4	2.549	117.019	Carboxylic acids and derivatives	110-15-6	HMDB0000254	C00042	ko01100//Metabolic pathways;ko01110//Biosynthesis of secondary metabolites;ko01120//Microbial metabolism in diverse environments;ko01130//Biosynthesis of antibiotics;ko00360//Phenylalanine metabolism;ko01200//Carbon metabolism;ko00350//Tyrosine metabolism;ko00250//Alanine, aspartate and glutamate metabolism;ko01220//Degradation of aromatic compounds;ko00630//Glyoxylate and dicarboxylate metabolis…	Amino acid metabolism;Carbohydrate metabolism;Energy metabolism;Global and overview maps;Metabolism of cofactors and vitamins	Metabolism
Com_158_neg	2.57849e+08	2.41614e+08	3.77808e+08	3.52135e+08	2.49732e+08	3.64971e+08	0.547404	0.0169298	0.0658281	1.91528	LPS 18:2	--	C24 H44 N O9 P	10.281	520.268	--	--	--	-	-	-	-
Com_476_neg	2.59336e+07	2.35607e+07	1.3796e+08	1.22881e+08	2.47471e+07	1.3042e+08	2.39783	0.00517619	0.0420079	1.84462	--	2-Methylpentanedioic acid	C6 H10 O4	5.113	145.05	Fatty Acyls	617-62-9	HMDB0000422	-	-	-	-
Com_240_neg	1.82555e+08	1.84032e+08	2.99591e+08	2.63611e+08	1.83293e+08	2.81601e+08	0.619499	0.0319461	0.0840021	1.75478	Dihydroartemisinin	--	C15 H24 O5	5.657	283.155	Prenol lipids	81496-81-3	HMDB0060593	-	-	-	-
Com_313_neg	2.18372e+08	2.05916e+08	1.30489e+08	1.20873e+08	2.12144e+08	1.25681e+08	-0.755281	0.0081799	0.04798	1.66565	--	Azelaic acid	C9 H16 O4	5.875	187.097	Fatty Acyls	123-99-9	HMDB0000784	-	-	-	-
Com_321_neg	2.0033e+08	2.05414e+08	1.31435e+08	1.23777e+08	2.02872e+08	1.27606e+08	-0.668878	0.00370758	0.039285	1.55821	PA (3:0/22:3)	--	C28 H49 O8 P	6.251	543.317	--	--	--	-	-	-	-
Com_148_neg	4.69518e+08	4.82514e+08	3.96155e+08	4.09323e+08	4.76016e+08	4.02739e+08	-0.241167	0.0155648	0.0628612	1.52847	3,8,9-trihydroxy-10-propyl-3,4,5,8,9,10-hexahydro-2H-oxecin-2-one	--	C12 H20 O5	5.685	243.124	--	--	--	-	-	-	-
Com_249_neg	5.71995e+07	5.37287e+07	1.39386e+08	1.16385e+08	5.54641e+07	1.27885e+08	1.20523	0.0248348	0.0736574	1.51187	PA (2:0/22:3)	--	C27 H47 O8 P	6.808	529.302	--	--	--	-	-	-	-
Com_472_neg	1.27986e+08	1.16007e+08	5.19309e+07	5.56119e+07	1.21996e+08	5.37714e+07	-1.18193	0.00832901	0.04798	1.47928	Suberic acid	--	C8 H14 O4	5.551	173.082	Fatty Acyls	505-48-6	HMDB0000893	-	-	-	-
Com_581_neg	9.91272e+07	9.36007e+07	3.27252e+07	3.07424e+07	9.6364e+07	3.17338e+07	-1.60247	0.00205695	0.0310272	1.44463	Mangostin	--	C24 H26 O6	5.013	409.172	Benzopyrans	1551491	HMDB0035796	-	-	-	-
Com_364_neg	1.61105e+08	1.71212e+08	9.71847e+07	1.10787e+08	1.66159e+08	1.03986e+08	-0.676179	0.0180702	0.0671303	1.40605	(卤)9(10)-DiHOME	--	C18 H34 O4	7.546	313.238	--	--	--	-	-	-	-
Com_441_neg	1.35098e+08	1.363e+08	7.80166e+07	7.45053e+07	1.35699e+08	7.62609e+07	-0.83139	0.000973335	0.0237136	1.38645	--	alpha-Zearalanol	C18 H26 O5	6.106	321.171	Macrolides and analogues	26538-44-3	HMDB0032702	-	-	-	-
Com_824_neg	6.33498e+07	5.67486e+07	3.41334e+06	2.29106e+06	6.00492e+07	2.8522e+06	-4.396	0.00340866	0.0384031	1.35802	LPA 17:0	--	C20 H41 O7 P	5.853	423.25	--	--	--	-	-	-	-
Com_618_neg	8.02639e+07	8.93613e+07	3.11183e+07	2.6038e+07	8.48126e+07	2.85781e+07	-1.56937	0.00847437	0.0483966	1.34389	Orcinol gentiobioside	--	C19 H28 O12	5.302	447.151	--	--	--	-	-	-	-
Com_710_neg	1.76095e+07	1.74194e+07	8.27044e+07	6.23414e+07	1.75145e+07	7.25229e+07	2.04989	0.0325955	0.0850976	1.31224	Scopolin	--	C16 H18 O9	5.096	399.093	--	--	--	C01527	ko01110//Biosynthesis of secondary metabolites;ko00940//Phenylpropanoid biosynthesis	Biosynthesis of other secondary metabolites;Global and overview maps	Metabolism
Com_426_neg	1.31325e+08	1.40418e+08	8.58645e+07	8.12493e+07	1.35871e+08	8.35569e+07	-0.701411	0.0093664	0.0503444	1.29565	MGDG (2:0/16:3)	--	C27 H44 O10	6.246	587.307	--	--	--	-	-	-	-
Com_659_neg	8.45696e+07	6.33536e+07	2.32551e+07	2.04559e+07	7.39616e+07	2.18555e+07	-1.75878	0.0396755	0.10001	1.27165	Mevalonic acid	--	C6 H12 O4	5.066	147.066	Fatty Acyls	150-97-0	HMDB0000227	C00418	ko01100//Metabolic pathways;ko01110//Biosynthesis of secondary metabolites;ko01130//Biosynthesis of antibiotics;ko00900//Terpenoid backbone biosynthesis	Global and overview maps;Metabolism of terpenoids and polyketides	Metabolism
Com_632_neg	8.97062e+07	8.02189e+07	2.62139e+07	4.2157e+07	8.49625e+07	3.41855e+07	-1.31344	0.0317908	0.0838955	1.26084	1a,1b-Dihomo prostaglandin F2伪	--	C22 H38 O5	7.88	381.264	--	--	--	-	-	-	-
Com_776_neg	2.74528e+07	2.03242e+07	7.25775e+07	7.20486e+07	2.38885e+07	7.23131e+07	1.59794	0.00540344	0.0420079	1.24893	--	Prim-O-glucosylcimifugin	C22 H28 O11	5.375	467.156	--	--	--	-	-	-	-
Com_878_neg	1.14816e+07	1.31098e+07	6.30137e+07	5.55978e+07	1.22957e+07	5.93057e+07	2.27002	0.00645806	0.0458334	1.22938	--	Arabidopyl ketoadipic acid	C15 H14 O9	5.357	337.057	--	--	--	-	-	-	-
Com_599_neg	5.00003e+07	4.59365e+07	8.17714e+07	1.01422e+08	4.79684e+07	9.15969e+07	0.933214	0.0490306	0.115246	1.15926	Phytolaccagenin	--	C31 H48 O7	7.629	531.332	--	--	--	-	-	-	-
Com_541_neg	1.09543e+08	1.05034e+08	6.23873e+07	6.86035e+07	1.07289e+08	6.54954e+07	-0.712034	0.00833578	0.04798	1.15791	2-Hydroxyvaleric acid	--	C5 H10 O3	5.451	117.055	Fatty Acyls	617-31-2	HMDB0001863	-	-	-	-
Com_567_neg	3.33268e+06	3.40827e+06	4.75894e+07	4.14798e+07	3.37048e+06	4.45346e+07	3.7239	0.0054629	0.0420079	1.15106	4,5-Dicaffeoylquinic acid	--	C25 H24 O12	5.317	515.119	Alcohols and polyols	57378-72-0	HMDB0030707	-	-	-	-
Com_325_neg	1.22795e+08	1.23864e+08	8.38489e+07	8.25857e+07	1.23329e+08	8.32173e+07	-0.56756	0.000425262	0.0237136	1.13928	Gentiopicrin	--	C16 H20 O9	5.243	355.103	--	--	--	C09782	ko01110//Biosynthesis of secondary metabolites	Global and overview maps	Metabolism
Com_866_neg	5.9125e+07	5.76187e+07	2.3009e+07	1.39872e+07	5.83719e+07	1.84981e+07	-1.6579	0.0129013	0.0563261	1.12872	PI (3:0/18:4)	--	C30 H49 O13 P	5.891	629.282	--	--	--	-	-	-	-
Com_730_neg	6.42524e+07	5.04665e+07	1.68913e+07	1.69403e+07	5.73594e+07	1.69158e+07	-1.76166	0.0278405	0.0801235	1.12734	Salvinorin B	--	C21 H26 O7	7.409	389.164	--	--	--	-	-	-	-
Com_1074_neg	4.49975e+07	3.55814e+07	2.57393e+06	2.02871e+06	4.02894e+07	2.30132e+06	-4.12987	0.0150642	0.0615193	1.09995	Dihydrocucurbitacin F	--	C30 H48 O7	8.668	519.33	--	--	--	-	-	-	-
Com_1315_neg	441010	621728	3.78899e+07	3.52532e+07	531369	3.65715e+07	6.10486	0.00134165	0.0261107	1.0793	Plantamajoside	--	C29 H36 O16	5.268	639.193	--	--	--	-	-	-	-
Com_1109_neg	4.31628e+07	4.1088e+07	8.54054e+06	7.97976e+06	4.21254e+07	8.26015e+06	-2.35045	0.00100543	0.0237136	1.04632	16伪-Hydroxyestrone	--	C18 H22 O3	5.169	285.146	--	--	--	-	-	-	-
Com_605_neg	9.47148e+07	8.43691e+07	5.47738e+07	5.75298e+07	8.9542e+07	5.61518e+07	-0.673232	0.0247532	0.0736574	1.02598	--	delta-Hexanolactone	C6 H10 O2	5.453	113.061	Lactones	823-22-3	HMDB0000453	-	-	-	-
Com_957_neg	2.2888e+07	2.46301e+07	5.65023e+07	5.58015e+07	2.3759e+07	5.61519e+07	1.24086	0.000839034	0.0237136	1.02341	Rosamultin	--	C36 H58 O10	5.769	685.381	--	--	--	-	-	-	-
Com_1157_neg	4.07912e+07	3.64299e+07	5.81419e+06	7.05917e+06	3.86105e+07	6.43668e+06	-2.58461	0.00493141	0.0420079	1.01768	4-Oxoproline	--	C5 H7 N O3	1.445	128.035	--	--	--	C01877	ko00330//Arginine and proline metabolism	Amino acid metabolism	Metabolism
Com_943_neg	5.36117e+07	5.0361e+07	2.09455e+07	1.95322e+07	5.19864e+07	2.02388e+07	-1.36101	0.00310195	0.0377921	1.01194	PE (3:0/15:1)	--	C23 H44 N O8 P	8.681	492.273	--	--	--	-	-	-	-
Com_643_neg	8.77333e+07	8.25127e+07	5.43014e+07	5.26428e+07	8.5123e+07	5.34721e+07	-0.670763	0.00740511	0.047127	1.00809	MGDG (2:0/16:4)	--	C27 H42 O10	5.963	585.292	--	--	--	-	-	-	-
