# Supplementary material for: Magnesium Nutrient Application Induces Metabolomics and Physiological Responses in Mulberry (Morus alba) Plants
Source: Int J Mol Sci. 2023 Jun 2;24(11):9650. doi: 10.3390/ijms24119650 (PMC10253527; doi:10.3390/ijms24119650)
Supplement: Supplementary file 1 [file ijms-24-09650-s001.zip › Supplementary Table S3.xlsx]

## Sheet: CK-T5
Table S3. Metabolic KEGG pathway and enrichment analysis
KEGG_A_class	KEGG_B_class	Pathway	CK-vs-T5 (35)	All (254)	Pvalue	Qvalue	Pathway ID	Metabolites	C_IDs
Metabolism	Biosynthesis of other secondary metabolites	Flavone and flavonol biosynthesis	4	6	0.00376352	0.19194	ko00944	Com_321_pos(Kaempferol);Com_428_pos(Quercetin);Com_303_pos(Trifolin);Com_421_neg(Rutin)	C05903+C00389+C12626+C05625
Metabolism	Amino acid metabolism	Alanine, aspartate and glutamate metabolism	4	10	0.0347769	0.457994	ko00250	Com_869_pos(N-Acetyl-L-aspartic acid);Com_208_neg(Fumaric acid);Com_21_neg(2-Oxoglutaric acid);Com_141_neg(Succinic acid)	C01042+C00122+C00026+C00042
Metabolism	Carbohydrate metabolism	Citrate cycle (TCA cycle)	3	6	0.0359211	0.457994	ko00020	Com_208_neg(Fumaric acid);Com_21_neg(2-Oxoglutaric acid);Com_141_neg(Succinic acid)	C00122+C00026+C00042
Metabolism	Carbohydrate metabolism	Butanoate metabolism	3	6	0.0359211	0.457994	ko00650	Com_208_neg(Fumaric acid);Com_21_neg(2-Oxoglutaric acid);Com_141_neg(Succinic acid)	C00122+C00026+C00042
Metabolism	Carbohydrate metabolism	Pyruvate metabolism	2	3	0.0507039	0.51718	ko00620	Com_208_neg(Fumaric acid);Com_141_neg(Succinic acid)	C00122+C00042
Metabolism	Energy metabolism	Oxidative phosphorylation	2	4	0.0926354	0.595941	ko00190	Com_208_neg(Fumaric acid);Com_141_neg(Succinic acid)	C00122+C00042
Metabolism	Lipid metabolism	Fatty acid elongation	1	1	0.137795	0.595941	ko00062	Com_429_pos(Palmitic Acid)	C00249
Metabolism	Carbohydrate metabolism	Propanoate metabolism	1	1	0.137795	0.595941	ko00640	Com_141_neg(Succinic acid)	C00042
Metabolism	Metabolism of terpenoids and polyketides	Terpenoid backbone biosynthesis	1	1	0.137795	0.595941	ko00900	Com_659_neg(Mevalonic acid)	C00418
Metabolism	Global and overview maps	Fatty acid metabolism	1	1	0.137795	0.595941	ko01212	Com_429_pos(Palmitic Acid)	C00249
Metabolism	Global and overview maps	Degradation of aromatic compounds	3	10	0.145406	0.595941	ko01220	Com_1210_pos(Cuminaldehyde);Com_208_neg(Fumaric acid);Com_141_neg(Succinic acid)	C06577+C00122+C00042
Metabolism	Amino acid metabolism	Phenylalanine metabolism	4	16	0.162882	0.595941	ko00360	Com_558_pos(2-Hydroxycinnamic acid);Com_45_neg(N-Acetyl-L-phenylalanine);Com_208_neg(Fumaric acid);Com_141_neg(Succinic acid)	C01772+C03519+C00122+C00042
Metabolism	Lipid metabolism	Linoleic acid metabolism	2	6	0.193786	0.595941	ko00591	Com_69_pos(9-Oxo-ODE);Com_68_neg(-)	C14766+C04717
Metabolism	Carbohydrate metabolism	C5-Branched dibasic acid metabolism	2	6	0.193786	0.595941	ko00660	Com_435_pos(trans-Aconitic acid);Com_21_neg(2-Oxoglutaric acid)	C02341+C00026
Metabolism	Metabolism of cofactors and vitamins	Porphyrin and chlorophyll metabolism	2	6	0.193786	0.595941	ko00860	Com_1073_pos(Stercobilin);Com_39_pos(-)	C05793+C18021
Metabolism	Biosynthesis of other secondary metabolites	Phenylpropanoid biosynthesis	4	18	0.223687	0.595941	ko00940	Com_586_pos(Coumarin);Com_1431_pos(Scopoletin);Com_558_pos(2-Hydroxycinnamic acid);Com_710_neg(Scopolin)	C05851+C01752+C01772+C01527
Metabolism	Carbohydrate metabolism	Glyoxylate and dicarboxylate metabolism	2	7	0.248529	0.595941	ko00630	Com_21_neg(2-Oxoglutaric acid);Com_141_neg(Succinic acid)	C00026+C00042
Metabolism	Metabolism of cofactors and vitamins	Nicotinate and nicotinamide metabolism	2	7	0.248529	0.595941	ko00760	Com_208_neg(Fumaric acid);Com_141_neg(Succinic acid)	C00122+C00042
Metabolism	Lipid metabolism	Fatty acid biosynthesis	1	2	0.257073	0.595941	ko00061	Com_429_pos(Palmitic Acid)	C00249
Metabolism	Lipid metabolism	Fatty acid degradation	1	2	0.257073	0.595941	ko00071	Com_429_pos(Palmitic Acid)	C00249
Metabolism	Lipid metabolism	Sphingolipid metabolism	1	2	0.257073	0.595941	ko00600	Com_597_pos(Psychosine)	C01747
Metabolism	Energy metabolism	Sulfur metabolism	1	2	0.257073	0.595941	ko00920	Com_141_neg(Succinic acid)	C00042
Metabolism	Global and overview maps	Carbon metabolism	3	14	0.300366	0.612437	ko01200	Com_208_neg(Fumaric acid);Com_21_neg(2-Oxoglutaric acid);Com_141_neg(Succinic acid)	C00122+C00026+C00042
Metabolism	Metabolism of other amino acids	Glutathione metabolism	2	8	0.303863	0.612437	ko00480	Com_358_pos(L-Pyroglutamic acid);Com_708_pos(-)	C01879+C01879
Metabolism	Biosynthesis of other secondary metabolites	Tropane, piperidine and pyridine alkaloid biosynthesis	2	8	0.303863	0.612437	ko00960	Com_65_pos(Pipecolic acid);Com_702_pos(Ecgonine methyl ester)	C00408+C12448
Metabolism	Global and overview maps	Microbial metabolism in diverse environments	8	49	0.353884	0.612437	ko01120	Com_548_pos(Testosterone);Com_1131_pos(4-Hydroxybenzaldehyde);Com_545_pos(Pyridoxine);Com_1210_pos(Cuminaldehyde);Com_558_pos(2-Hydroxycinnamic acid);Com_208_neg(Fumaric acid);Com_21_neg(2-Oxoglutaric acid);Com_141_neg(Succinic acid)	C00535+C00633+C00314+C06577+C01772+C00122+C00026+C00042
Metabolism	Amino acid metabolism	Arginine biosynthesis	2	9	0.358619	0.612437	ko00220	Com_208_neg(Fumaric acid);Com_21_neg(2-Oxoglutaric acid)	C00122+C00026
Metabolism	Lipid metabolism	Cutin, suberine and wax biosynthesis	1	3	0.360257	0.612437	ko00073	Com_429_pos(Palmitic Acid)	C00249
Metabolism	Metabolism of other amino acids	Taurine and hypotaurine metabolism	1	3	0.360257	0.612437	ko00430	Com_21_neg(2-Oxoglutaric acid)	C00026
Metabolism	Metabolism of cofactors and vitamins	Vitamin B6 metabolism	1	3	0.360257	0.612437	ko00750	Com_545_pos(Pyridoxine)	C00314
Metabolism	Global and overview maps	Biosynthesis of secondary metabolites	17	116	0.42392	0.694627	ko01110	Com_321_pos(Kaempferol);Com_586_pos(Coumarin);Com_65_pos(Pipecolic acid);Com_702_pos(Ecgonine methyl ester);Com_428_pos(Quercetin);Com_211_pos(Pantothenic acid);Com_1431_pos(Scopoletin);Com_558_pos(2-Hydroxycinnamic acid);Com_524_pos(Allocryptopine);Com_39_pos(-);Com_421_neg(Rutin);Com_208_neg(Fumaric acid);Com_325_neg(Gentiopicrin);Com_21_neg(2-Oxoglutaric acid);Com_710_neg(Scopolin);Com_141_neg…	C05903+C05851+C00408+C12448+C00389+C00864+C01752+C01772+C02134+C18021+C05625+C00122+C09782+C00026+C01527+C00042+C00418
Metabolism	Carbohydrate metabolism	Ascorbate and aldarate metabolism	1	4	0.449464	0.694627	ko00053	Com_21_neg(2-Oxoglutaric acid)	C00026
Metabolism	Lipid metabolism	Glycerophospholipid metabolism	1	4	0.449464	0.694627	ko00564	Com_35_pos(Choline)	C00114
Metabolism	Carbohydrate metabolism	Pentose and glucuronate interconversions	1	5	0.526539	0.737746	ko00040	Com_21_neg(2-Oxoglutaric acid)	C00026
Metabolism	Metabolism of cofactors and vitamins	Pantothenate and CoA biosynthesis	1	5	0.526539	0.737746	ko00770	Com_211_pos(Pantothenic acid)	C00864
Metabolism	Amino acid metabolism	Tyrosine metabolism	2	13	0.557695	0.737746	ko00350	Com_208_neg(Fumaric acid);Com_141_neg(Succinic acid)	C00122+C00042
Metabolism	Nucleotide metabolism	Purine metabolism	1	6	0.59309	0.737746	ko00230	Com_829_pos(Guanine)	C00242
Metabolism	Amino acid metabolism	Glycine, serine and threonine metabolism	1	6	0.59309	0.737746	ko00260	Com_35_pos(Choline)	C00114
Metabolism	Amino acid metabolism	Lysine biosynthesis	1	6	0.59309	0.737746	ko00300	Com_21_neg(2-Oxoglutaric acid)	C00026
Metabolism	Amino acid metabolism	Lysine degradation	1	6	0.59309	0.737746	ko00310	Com_65_pos(Pipecolic acid)	C00408
Metabolism	Amino acid metabolism	Histidine metabolism	1	6	0.59309	0.737746	ko00340	Com_21_neg(2-Oxoglutaric acid)	C00026
Metabolism	Global and overview maps	Metabolic pathways	20	148	0.631571	0.754008	ko01100	Com_321_pos(Kaempferol);Com_35_pos(Choline);Com_65_pos(Pipecolic acid);Com_548_pos(Testosterone);Com_702_pos(Ecgonine methyl ester);Com_358_pos(L-Pyroglutamic acid);Com_829_pos(Guanine);Com_1131_pos(4-Hydroxybenzaldehyde);Com_428_pos(Quercetin);Com_545_pos(Pyridoxine);Com_211_pos(Pantothenic acid);Com_869_pos(N-Acetyl-L-aspartic acid);Com_708_pos(-);Com_429_pos(Palmitic Acid);Com_421_neg(Rutin);C…	C05903+C00114+C00408+C00535+C12448+C01879+C00242+C00633+C00389+C00314+C00864+C01042+C01879+C00249+C05625+C00122+C00026+C00042+C04717+C00418
Metabolism	Metabolism of other amino acids	beta-Alanine metabolism	1	7	0.650517	0.754008	ko00410	Com_211_pos(Pantothenic acid)	C00864
Metabolism	Biosynthesis of other secondary metabolites	Isoquinoline alkaloid biosynthesis	1	7	0.650517	0.754008	ko00950	Com_524_pos(Allocryptopine)	C02134
Metabolism	Biosynthesis of other secondary metabolites	Flavonoid biosynthesis	2	16	0.677208	0.767502	ko00941	Com_321_pos(Kaempferol);Com_428_pos(Quercetin)	C05903+C00389
Metabolism	Amino acid metabolism	Arginine and proline metabolism	1	8	0.700039	0.77613	ko00330	Com_1157_neg(4-Oxoproline)	C01877
Metabolism	Global and overview maps	Biosynthesis of antibiotics	4	34	0.726337	0.788153	ko01130	Com_208_neg(Fumaric acid);Com_21_neg(2-Oxoglutaric acid);Com_141_neg(Succinic acid);Com_659_neg(Mevalonic acid)	C00122+C00026+C00042+C00418
Metabolism	Lipid metabolism	Biosynthesis of unsaturated fatty acids	1	9	0.742716	0.789136	ko01040	Com_429_pos(Palmitic Acid)	C00249
Metabolism	Global and overview maps	2-Oxocarboxylic acid metabolism	1	14	0.881782	0.917773	ko01210	Com_21_neg(2-Oxoglutaric acid)	C00026
Environmental Information Processing	Membrane transport	ABC transporters	1	22	0.967177	0.976352	ko02010	Com_35_pos(Choline)	C00114
Metabolism	Global and overview maps	Biosynthesis of amino acids	1	24	0.976352	0.976352	ko01230	Com_21_neg(2-Oxoglutaric acid)	C00026

## Sheet: CK-T4
KEGG_A_class	KEGG_B_class	Pathway	CK-vs-T4 (24)	All (254)	Pvalue	Qvalue	Pathway ID	Metabolites	C_IDs
Metabolism	Metabolism of cofactors and vitamins	Porphyrin and chlorophyll metabolism	3	6	0.0123516	0.506552	ko00860	Com_168_pos(L-Glutamic acid);Com_1073_pos(Stercobilin);Com_39_pos(-)	C00025+C05793+C18021
Metabolism	Amino acid metabolism	Phenylalanine metabolism	4	16	0.0515891	0.506552	ko00360	Com_44_pos(L-Phenylalanine);Com_558_pos(2-Hydroxycinnamic acid);Com_45_neg(N-Acetyl-L-phenylalanine);Com_208_neg(Fumaric acid)	C00079+C01772+C03519+C00122
Metabolism	Lipid metabolism	Fatty acid elongation	1	1	0.0944882	0.506552	ko00062	Com_429_pos(Palmitic Acid)	C00249
Metabolism	Metabolism of terpenoids and polyketides	Terpenoid backbone biosynthesis	1	1	0.0944882	0.506552	ko00900	Com_659_neg(Mevalonic acid)	C00418
Metabolism	Energy metabolism	Nitrogen metabolism	1	1	0.0944882	0.506552	ko00910	Com_168_pos(L-Glutamic acid)	C00025
Metabolism	Global and overview maps	Fatty acid metabolism	1	1	0.0944882	0.506552	ko01212	Com_429_pos(Palmitic Acid)	C00249
Metabolism	Lipid metabolism	Linoleic acid metabolism	2	6	0.101556	0.506552	ko00591	Com_69_pos(9-Oxo-ODE);Com_68_neg(-)	C14766+C04717
Metabolism	Carbohydrate metabolism	Butanoate metabolism	2	6	0.101556	0.506552	ko00650	Com_168_pos(L-Glutamic acid);Com_208_neg(Fumaric acid)	C00025+C00122
Metabolism	Carbohydrate metabolism	C5-Branched dibasic acid metabolism	2	6	0.101556	0.506552	ko00660	Com_168_pos(L-Glutamic acid);Com_146_neg(-)	C00025+C00490
Metabolism	Metabolism of cofactors and vitamins	Nicotinate and nicotinamide metabolism	2	7	0.134073	0.506552	ko00760	Com_309_pos(Nicotinamide);Com_208_neg(Fumaric acid)	C00153+C00122
Metabolism	Global and overview maps	Microbial metabolism in diverse environments	7	49	0.154235	0.506552	ko01120	Com_375_pos(Acetophenone);Com_1131_pos(4-Hydroxybenzaldehyde);Com_168_pos(L-Glutamic acid);Com_545_pos(Pyridoxine);Com_558_pos(2-Hydroxycinnamic acid);Com_208_neg(Fumaric acid);Com_358_neg(-)	C07113+C00633+C00025+C00314+C01772+C00122+C07130
Metabolism	Metabolism of other amino acids	Glutathione metabolism	2	8	0.168629	0.506552	ko00480	Com_168_pos(L-Glutamic acid);Com_708_pos(-)	C00025+C01879
Metabolism	Lipid metabolism	Fatty acid biosynthesis	1	2	0.180387	0.506552	ko00061	Com_429_pos(Palmitic Acid)	C00249
Metabolism	Lipid metabolism	Fatty acid degradation	1	2	0.180387	0.506552	ko00071	Com_429_pos(Palmitic Acid)	C00249
Metabolism	Biosynthesis of other secondary metabolites	Carbapenem biosynthesis	1	2	0.180387	0.506552	ko00332	Com_168_pos(L-Glutamic acid)	C00025
Metabolism	Biosynthesis of other secondary metabolites	Glucosinolate biosynthesis	1	2	0.180387	0.506552	ko00966	Com_44_pos(L-Phenylalanine)	C00079
Metabolism	Amino acid metabolism	Arginine biosynthesis	2	9	0.204591	0.506552	ko00220	Com_168_pos(L-Glutamic acid);Com_208_neg(Fumaric acid)	C00025+C00122
Metabolism	Biosynthesis of other secondary metabolites	Phenylpropanoid biosynthesis	3	18	0.234561	0.506552	ko00940	Com_586_pos(Coumarin);Com_44_pos(L-Phenylalanine);Com_558_pos(2-Hydroxycinnamic acid)	C05851+C00079+C01772
Metabolism	Amino acid metabolism	Alanine, aspartate and glutamate metabolism	2	10	0.241415	0.506552	ko00250	Com_168_pos(L-Glutamic acid);Com_208_neg(Fumaric acid)	C00025+C00122
Genetic Information Processing	Translation	Aminoacyl-tRNA biosynthesis	2	10	0.241415	0.506552	ko00970	Com_44_pos(L-Phenylalanine);Com_168_pos(L-Glutamic acid)	C00079+C00025
Metabolism	Global and overview maps	Degradation of aromatic compounds	2	10	0.241415	0.506552	ko01220	Com_375_pos(Acetophenone);Com_208_neg(Fumaric acid)	C07113+C00122
Metabolism	Lipid metabolism	Cutin, suberine and wax biosynthesis	1	3	0.258445	0.506552	ko00073	Com_429_pos(Palmitic Acid)	C00249
Metabolism	Metabolism of other amino acids	Taurine and hypotaurine metabolism	1	3	0.258445	0.506552	ko00430	Com_168_pos(L-Glutamic acid)	C00025
Metabolism	Carbohydrate metabolism	Pyruvate metabolism	1	3	0.258445	0.506552	ko00620	Com_208_neg(Fumaric acid)	C00122
Metabolism	Metabolism of cofactors and vitamins	Vitamin B6 metabolism	1	3	0.258445	0.506552	ko00750	Com_545_pos(Pyridoxine)	C00314
Metabolism	Energy metabolism	Oxidative phosphorylation	1	4	0.329351	0.540396	ko00190	Com_208_neg(Fumaric acid)	C00122
Metabolism	Biosynthesis of other secondary metabolites	Caffeine metabolism	1	4	0.329351	0.540396	ko00232	Com_358_neg(-)	C07130
Metabolism	Lipid metabolism	Glycerophospholipid metabolism	1	4	0.329351	0.540396	ko00564	Com_35_pos(Choline)	C00114
Metabolism	Metabolism of terpenoids and polyketides	Diterpenoid biosynthesis	1	4	0.329351	0.540396	ko00904	Com_1085_pos(-)	C09092
Environmental Information Processing	Membrane transport	ABC transporters	3	22	0.345136	0.540396	ko02010	Com_35_pos(Choline);Com_44_pos(L-Phenylalanine);Com_168_pos(L-Glutamic acid)	C00114+C00079+C00025
Metabolism	Global and overview maps	Carbon metabolism	2	14	0.389177	0.540396	ko01200	Com_168_pos(L-Glutamic acid);Com_208_neg(Fumaric acid)	C00025+C00122
Metabolism	Global and overview maps	2-Oxocarboxylic acid metabolism	2	14	0.389177	0.540396	ko01210	Com_44_pos(L-Phenylalanine);Com_168_pos(L-Glutamic acid)	C00079+C00025
Metabolism	Metabolism of other amino acids	Cyanoamino acid metabolism	1	5	0.393733	0.540396	ko00460	Com_44_pos(L-Phenylalanine)	C00079
Metabolism	Metabolism of cofactors and vitamins	Pantothenate and CoA biosynthesis	1	5	0.393733	0.540396	ko00770	Com_211_pos(Pantothenic acid)	C00864
Metabolism	Global and overview maps	Biosynthesis of antibiotics	4	34	0.404272	0.540396	ko01130	Com_44_pos(L-Phenylalanine);Com_168_pos(L-Glutamic acid);Com_208_neg(Fumaric acid);Com_659_neg(Mevalonic acid)	C00079+C00025+C00122+C00418
Metabolism	Global and overview maps	Biosynthesis of secondary metabolites	12	116	0.406535	0.540396	ko01110	Com_586_pos(Coumarin);Com_44_pos(L-Phenylalanine);Com_168_pos(L-Glutamic acid);Com_211_pos(Pantothenic acid);Com_1085_pos(-);Com_558_pos(2-Hydroxycinnamic acid);Com_39_pos(-);Com_421_neg(Rutin);Com_208_neg(Fumaric acid);Com_325_neg(Gentiopicrin);Com_358_neg(-);Com_659_neg(Mevalonic acid)	C05851+C00079+C00025+C00864+C09092+C01772+C18021+C05625+C00122+C09782+C07130+C00418
Metabolism	Carbohydrate metabolism	Citrate cycle (TCA cycle)	1	6	0.452168	0.540396	ko00020	Com_208_neg(Fumaric acid)	C00122
Metabolism	Amino acid metabolism	Glycine, serine and threonine metabolism	1	6	0.452168	0.540396	ko00260	Com_35_pos(Choline)	C00114
Metabolism	Amino acid metabolism	Histidine metabolism	1	6	0.452168	0.540396	ko00340	Com_168_pos(L-Glutamic acid)	C00025
Metabolism	Amino acid metabolism	Phenylalanine, tyrosine and tryptophan biosynthesis	1	6	0.452168	0.540396	ko00400	Com_44_pos(L-Phenylalanine)	C00079
Metabolism	Biosynthesis of other secondary metabolites	Flavone and flavonol biosynthesis	1	6	0.452168	0.540396	ko00944	Com_421_neg(Rutin)	C05625
Metabolism	Metabolism of other amino acids	beta-Alanine metabolism	1	7	0.505184	0.575675	ko00410	Com_211_pos(Pantothenic acid)	C00864
Metabolism	Carbohydrate metabolism	Glyoxylate and dicarboxylate metabolism	1	7	0.505184	0.575675	ko00630	Com_168_pos(L-Glutamic acid)	C00025
Metabolism	Amino acid metabolism	Arginine and proline metabolism	1	8	0.553264	0.602443	ko00330	Com_168_pos(L-Glutamic acid)	C00025
Metabolism	Biosynthesis of other secondary metabolites	Tropane, piperidine and pyridine alkaloid biosynthesis	1	8	0.553264	0.602443	ko00960	Com_44_pos(L-Phenylalanine)	C00079
Metabolism	Global and overview maps	Metabolic pathways	14	148	0.58687	0.622245	ko01100	Com_35_pos(Choline);Com_309_pos(Nicotinamide);Com_44_pos(L-Phenylalanine);Com_1131_pos(4-Hydroxybenzaldehyde);Com_168_pos(L-Glutamic acid);Com_545_pos(Pyridoxine);Com_211_pos(Pantothenic acid);Com_708_pos(-);Com_429_pos(Palmitic Acid);Com_421_neg(Rutin);Com_208_neg(Fumaric acid);Com_358_neg(-);Com_68_neg(-);Com_659_neg(Mevalonic acid)	C00114+C00153+C00079+C00633+C00025+C00314+C00864+C01879+C00249+C05625+C00122+C07130+C04717+C00418
Metabolism	Lipid metabolism	Biosynthesis of unsaturated fatty acids	1	9	0.596848	0.622245	ko01040	Com_429_pos(Palmitic Acid)	C00249
Metabolism	Global and overview maps	Biosynthesis of amino acids	2	24	0.690573	0.70496	ko01230	Com_44_pos(L-Phenylalanine);Com_168_pos(L-Glutamic acid)	C00079+C00025
Metabolism	Amino acid metabolism	Tyrosine metabolism	1	13	0.7338	0.7338	ko00350	Com_208_neg(Fumaric acid)	C00122

## Sheet: CK-T3
KEGG_A_class	KEGG_B_class	Pathway	CK-vs-T3 (33)	All (254)	Pvalue	Qvalue	Pathway ID	Metabolites	C_IDs
Metabolism	Lipid metabolism	Fatty acid biosynthesis	2	2	0.0164327	0.389195	ko00061	Com_6_pos(Palmitoleic Acid);Com_429_pos(Palmitic Acid)	C08362+C00249
Metabolism	Carbohydrate metabolism	Butanoate metabolism	3	6	0.0305346	0.389195	ko00650	Com_53_neg(D-(+)-Malic acid);Com_208_neg(Fumaric acid);Com_141_neg(Succinic acid)	C00497+C00122+C00042
Metabolism	Biosynthesis of other secondary metabolites	Flavone and flavonol biosynthesis	3	6	0.0305346	0.389195	ko00944	Com_321_pos(Kaempferol);Com_428_pos(Quercetin);Com_421_neg(Rutin)	C05903+C00389+C05625
Metabolism	Amino acid metabolism	Phenylalanine metabolism	5	16	0.0414467	0.389195	ko00360	Com_558_pos(2-Hydroxycinnamic acid);Com_45_neg(N-Acetyl-L-phenylalanine);Com_208_neg(Fumaric acid);Com_234_neg(-);Com_141_neg(Succinic acid)	C01772+C03519+C00122+C02265+C00042
Metabolism	Carbohydrate metabolism	Pyruvate metabolism	2	3	0.0452552	0.389195	ko00620	Com_208_neg(Fumaric acid);Com_141_neg(Succinic acid)	C00122+C00042
Metabolism	Energy metabolism	Oxidative phosphorylation	2	4	0.0831493	0.507874	ko00190	Com_208_neg(Fumaric acid);Com_141_neg(Succinic acid)	C00122+C00042
Metabolism	Global and overview maps	Degradation of aromatic compounds	3	10	0.126706	0.507874	ko01220	Com_375_pos(Acetophenone);Com_208_neg(Fumaric acid);Com_141_neg(Succinic acid)	C07113+C00122+C00042
Metabolism	Lipid metabolism	Fatty acid elongation	1	1	0.129921	0.507874	ko00062	Com_429_pos(Palmitic Acid)	C00249
Metabolism	Carbohydrate metabolism	Propanoate metabolism	1	1	0.129921	0.507874	ko00640	Com_141_neg(Succinic acid)	C00042
Metabolism	Metabolism of terpenoids and polyketides	Terpenoid backbone biosynthesis	1	1	0.129921	0.507874	ko00900	Com_659_neg(Mevalonic acid)	C00418
Metabolism	Global and overview maps	Fatty acid metabolism	1	1	0.129921	0.507874	ko01212	Com_429_pos(Palmitic Acid)	C00249
Metabolism	Carbohydrate metabolism	Citrate cycle (TCA cycle)	2	6	0.175847	0.540102	ko00020	Com_208_neg(Fumaric acid);Com_141_neg(Succinic acid)	C00122+C00042
Metabolism	Lipid metabolism	Linoleic acid metabolism	2	6	0.175847	0.540102	ko00591	Com_69_pos(9-Oxo-ODE);Com_68_neg(-)	C14766+C04717
Metabolism	Metabolism of cofactors and vitamins	Porphyrin and chlorophyll metabolism	2	6	0.175847	0.540102	ko00860	Com_1073_pos(Stercobilin);Com_39_pos(-)	C05793+C18021
Metabolism	Metabolism of cofactors and vitamins	Nicotinate and nicotinamide metabolism	2	7	0.226707	0.615684	ko00760	Com_208_neg(Fumaric acid);Com_141_neg(Succinic acid)	C00122+C00042
Metabolism	Lipid metabolism	Fatty acid degradation	1	2	0.24341	0.615684	ko00071	Com_429_pos(Palmitic Acid)	C00249
Metabolism	Energy metabolism	Sulfur metabolism	1	2	0.24341	0.615684	ko00920	Com_141_neg(Succinic acid)	C00042
Metabolism	Metabolism of other amino acids	Glutathione metabolism	2	8	0.278595	0.630505	ko00480	Com_358_pos(L-Pyroglutamic acid);Com_708_pos(-)	C01879+C01879
Metabolism	Biosynthesis of other secondary metabolites	Tropane, piperidine and pyridine alkaloid biosynthesis	2	8	0.278595	0.630505	ko00960	Com_65_pos(Pipecolic acid);Com_702_pos(Ecgonine methyl ester)	C00408+C12448
Metabolism	Lipid metabolism	Cutin, suberine and wax biosynthesis	1	3	0.342487	0.692303	ko00073	Com_429_pos(Palmitic Acid)	C00249
Metabolism	Biosynthesis of other secondary metabolites	Flavonoid biosynthesis	3	16	0.345176	0.692303	ko00941	Com_321_pos(Kaempferol);Com_428_pos(Quercetin);Com_1509_pos(Prunin)	C05903+C00389+C09099
Metabolism	Amino acid metabolism	Alanine, aspartate and glutamate metabolism	2	10	0.381354	0.692303	ko00250	Com_208_neg(Fumaric acid);Com_141_neg(Succinic acid)	C00122+C00042
Metabolism	Biosynthesis of other secondary metabolites	Caffeine metabolism	1	4	0.428933	0.692303	ko00232	Com_358_neg(-)	C07130
Metabolism	Lipid metabolism	Glycerophospholipid metabolism	1	4	0.428933	0.692303	ko00564	Com_35_pos(Choline)	C00114
Metabolism	Lipid metabolism	alpha-Linolenic acid metabolism	1	4	0.428933	0.692303	ko00592	Com_9_neg(13(S)-HOTrE)	C16316
Metabolism	Metabolism of terpenoids and polyketides	Diterpenoid biosynthesis	1	4	0.428933	0.692303	ko00904	Com_1085_pos(-)	C09092
Metabolism	Global and overview maps	Biosynthesis of secondary metabolites	16	116	0.434702	0.692303	ko01110	Com_321_pos(Kaempferol);Com_586_pos(Coumarin);Com_65_pos(Pipecolic acid);Com_702_pos(Ecgonine methyl ester);Com_428_pos(Quercetin);Com_211_pos(Pantothenic acid);Com_1085_pos(-);Com_558_pos(2-Hydroxycinnamic acid);Com_524_pos(Allocryptopine);Com_39_pos(-);Com_421_neg(Rutin);Com_208_neg(Fumaric acid);Com_325_neg(Gentiopicrin);Com_358_neg(-);Com_141_neg(Succinic acid);Com_659_neg(Mevalonic acid)	C05903+C05851+C00408+C12448+C00389+C00864+C09092+C01772+C02134+C18021+C05625+C00122+C09782+C07130+C00042+C00418
Metabolism	Global and overview maps	Microbial metabolism in diverse environments	7	49	0.46034	0.706951	ko01120	Com_548_pos(Testosterone);Com_375_pos(Acetophenone);Com_1131_pos(4-Hydroxybenzaldehyde);Com_558_pos(2-Hydroxycinnamic acid);Com_208_neg(Fumaric acid);Com_358_neg(-);Com_141_neg(Succinic acid)	C00535+C07113+C00633+C01772+C00122+C07130+C00042
Metabolism	Metabolism of cofactors and vitamins	Pantothenate and CoA biosynthesis	1	5	0.504314	0.742737	ko00770	Com_211_pos(Pantothenic acid)	C00864
Metabolism	Amino acid metabolism	Tyrosine metabolism	2	13	0.523251	0.742737	ko00350	Com_208_neg(Fumaric acid);Com_141_neg(Succinic acid)	C00122+C00042
Metabolism	Global and overview maps	Carbon metabolism	2	14	0.565816	0.742737	ko01200	Com_208_neg(Fumaric acid);Com_141_neg(Succinic acid)	C00122+C00042
Metabolism	Amino acid metabolism	Glycine, serine and threonine metabolism	1	6	0.570007	0.742737	ko00260	Com_35_pos(Choline)	C00114
Metabolism	Amino acid metabolism	Lysine degradation	1	6	0.570007	0.742737	ko00310	Com_65_pos(Pipecolic acid)	C00408
Metabolism	Metabolism of other amino acids	beta-Alanine metabolism	1	7	0.627224	0.749184	ko00410	Com_211_pos(Pantothenic acid)	C00864
Metabolism	Carbohydrate metabolism	Glyoxylate and dicarboxylate metabolism	1	7	0.627224	0.749184	ko00630	Com_141_neg(Succinic acid)	C00042
Metabolism	Biosynthesis of other secondary metabolites	Isoquinoline alkaloid biosynthesis	1	7	0.627224	0.749184	ko00950	Com_524_pos(Allocryptopine)	C02134
Metabolism	Amino acid metabolism	Arginine and proline metabolism	1	8	0.677028	0.77438	ko00330	Com_1157_neg(4-Oxoproline)	C01877
Metabolism	Biosynthesis of other secondary metabolites	Phenylpropanoid biosynthesis	2	18	0.709383	0.77438	ko00940	Com_586_pos(Coumarin);Com_558_pos(2-Hydroxycinnamic acid)	C05851+C01772
Metabolism	Amino acid metabolism	Arginine biosynthesis	1	9	0.720354	0.77438	ko00220	Com_208_neg(Fumaric acid)	C00122
Metabolism	Lipid metabolism	Biosynthesis of unsaturated fatty acids	1	9	0.720354	0.77438	ko01040	Com_429_pos(Palmitic Acid)	C00249
Metabolism	Global and overview maps	Metabolic pathways	17	148	0.84902	0.875734	ko01100	Com_321_pos(Kaempferol);Com_35_pos(Choline);Com_65_pos(Pipecolic acid);Com_548_pos(Testosterone);Com_702_pos(Ecgonine methyl ester);Com_358_pos(L-Pyroglutamic acid);Com_1131_pos(4-Hydroxybenzaldehyde);Com_428_pos(Quercetin);Com_211_pos(Pantothenic acid);Com_708_pos(-);Com_429_pos(Palmitic Acid);Com_421_neg(Rutin);Com_208_neg(Fumaric acid);Com_358_neg(-);Com_141_neg(Succinic acid);Com_68_neg(-);Co…	C05903+C00114+C00408+C00535+C12448+C01879+C00633+C00389+C00864+C01879+C00249+C05625+C00122+C07130+C00042+C04717+C00418
Metabolism	Global and overview maps	Biosynthesis of antibiotics	3	34	0.855369	0.875734	ko01130	Com_208_neg(Fumaric acid);Com_141_neg(Succinic acid);Com_659_neg(Mevalonic acid)	C00122+C00042+C00418
Environmental Information Processing	Membrane transport	ABC transporters	1	22	0.959499	0.959499	ko02010	Com_35_pos(Choline)	C00114

## Sheet: CK-T2
KEGG_A_class	KEGG_B_class	Pathway	CK-vs-T2 (26)	All (254)	Pvalue	Qvalue	Pathway ID	Metabolites	C_IDs
Metabolism	Lipid metabolism	Linoleic acid metabolism	3	6	0.0155672	0.190698	ko00591	Com_69_pos(9-Oxo-ODE);Com_768_neg(8Z,11Z,14Z-Eicosatrienoic acid);Com_68_neg(-)	C14766+C03242+C04717
Metabolism	Carbohydrate metabolism	Butanoate metabolism	3	6	0.0155672	0.190698	ko00650	Com_168_pos(L-Glutamic acid);Com_53_neg(D-(+)-Malic acid);Com_141_neg(Succinic acid)	C00025+C00497+C00042
Metabolism	Metabolism of cofactors and vitamins	Porphyrin and chlorophyll metabolism	3	6	0.0155672	0.190698	ko00860	Com_168_pos(L-Glutamic acid);Com_1073_pos(Stercobilin);Com_39_pos(-)	C00025+C05793+C18021
Metabolism	Biosynthesis of other secondary metabolites	Flavone and flavonol biosynthesis	3	6	0.0155672	0.190698	ko00944	Com_321_pos(Kaempferol);Com_428_pos(Quercetin);Com_303_pos(Trifolin)	C05903+C00389+C12626
Metabolism	Metabolism of other amino acids	Glutathione metabolism	3	8	0.0378415	0.370847	ko00480	Com_358_pos(L-Pyroglutamic acid);Com_168_pos(L-Glutamic acid);Com_708_pos(-)	C01879+C00025+C01879
Metabolism	Amino acid metabolism	Phenylalanine metabolism	4	16	0.0669616	0.529771	ko00360	Com_44_pos(L-Phenylalanine);Com_45_neg(N-Acetyl-L-phenylalanine);Com_234_neg(-);Com_141_neg(Succinic acid)	C00079+C03519+C02265+C00042
Metabolism	Biosynthesis of other secondary metabolites	Benzoxazinoid biosynthesis	1	1	0.102362	0.529771	ko00402	Com_365_pos(Indole)	C00463
Metabolism	Carbohydrate metabolism	Propanoate metabolism	1	1	0.102362	0.529771	ko00640	Com_141_neg(Succinic acid)	C00042
Metabolism	Energy metabolism	Nitrogen metabolism	1	1	0.102362	0.529771	ko00910	Com_168_pos(L-Glutamic acid)	C00025
Metabolism	Amino acid metabolism	Phenylalanine, tyrosine and tryptophan biosynthesis	2	6	0.116979	0.529771	ko00400	Com_44_pos(L-Phenylalanine);Com_365_pos(Indole)	C00079+C00463
Metabolism	Carbohydrate metabolism	Glyoxylate and dicarboxylate metabolism	2	7	0.153618	0.529771	ko00630	Com_168_pos(L-Glutamic acid);Com_141_neg(Succinic acid)	C00025+C00042
Metabolism	Metabolism of cofactors and vitamins	Nicotinate and nicotinamide metabolism	2	7	0.153618	0.529771	ko00760	Com_309_pos(Nicotinamide);Com_141_neg(Succinic acid)	C00153+C00042
Metabolism	Biosynthesis of other secondary metabolites	Tropane, piperidine and pyridine alkaloid biosynthesis	2	8	0.19221	0.529771	ko00960	Com_65_pos(Pipecolic acid);Com_44_pos(L-Phenylalanine)	C00408+C00079
Metabolism	Lipid metabolism	Fatty acid biosynthesis	1	2	0.19461	0.529771	ko00061	Com_6_pos(Palmitoleic Acid)	C08362
Metabolism	Biosynthesis of other secondary metabolites	Carbapenem biosynthesis	1	2	0.19461	0.529771	ko00332	Com_168_pos(L-Glutamic acid)	C00025
Metabolism	Biosynthesis of other secondary metabolites	Indole alkaloid biosynthesis	1	2	0.19461	0.529771	ko00901	Com_230_pos(Vindoline)	C01626
Metabolism	Energy metabolism	Sulfur metabolism	1	2	0.19461	0.529771	ko00920	Com_141_neg(Succinic acid)	C00042
Metabolism	Biosynthesis of other secondary metabolites	Glucosinolate biosynthesis	1	2	0.19461	0.529771	ko00966	Com_44_pos(L-Phenylalanine)	C00079
Metabolism	Amino acid metabolism	Alanine, aspartate and glutamate metabolism	2	10	0.272404	0.618526	ko00250	Com_168_pos(L-Glutamic acid);Com_141_neg(Succinic acid)	C00025+C00042
Genetic Information Processing	Translation	Aminoacyl-tRNA biosynthesis	2	10	0.272404	0.618526	ko00970	Com_44_pos(L-Phenylalanine);Com_168_pos(L-Glutamic acid)	C00079+C00025
Metabolism	Metabolism of other amino acids	Taurine and hypotaurine metabolism	1	3	0.277705	0.618526	ko00430	Com_168_pos(L-Glutamic acid)	C00025
Metabolism	Carbohydrate metabolism	Pyruvate metabolism	1	3	0.277705	0.618526	ko00620	Com_141_neg(Succinic acid)	C00042
Metabolism	Energy metabolism	Oxidative phosphorylation	1	4	0.352525	0.672614	ko00190	Com_141_neg(Succinic acid)	C00042
Metabolism	Biosynthesis of other secondary metabolites	Caffeine metabolism	1	4	0.352525	0.672614	ko00232	Com_358_neg(-)	C07130
Metabolism	Amino acid metabolism	Tryptophan metabolism	1	5	0.419862	0.672614	ko00380	Com_365_pos(Indole)	C00463
Metabolism	Metabolism of other amino acids	Cyanoamino acid metabolism	1	5	0.419862	0.672614	ko00460	Com_44_pos(L-Phenylalanine)	C00079
Metabolism	Metabolism of cofactors and vitamins	Pantothenate and CoA biosynthesis	1	5	0.419862	0.672614	ko00770	Com_211_pos(Pantothenic acid)	C00864
Metabolism	Global and overview maps	Carbon metabolism	2	14	0.43086	0.672614	ko01200	Com_168_pos(L-Glutamic acid);Com_141_neg(Succinic acid)	C00025+C00042
Metabolism	Global and overview maps	2-Oxocarboxylic acid metabolism	2	14	0.43086	0.672614	ko01210	Com_44_pos(L-Phenylalanine);Com_168_pos(L-Glutamic acid)	C00079+C00025
Metabolism	Global and overview maps	Metabolic pathways	16	148	0.44532	0.672614	ko01100	Com_321_pos(Kaempferol);Com_65_pos(Pipecolic acid);Com_548_pos(Testosterone);Com_309_pos(Nicotinamide);Com_44_pos(L-Phenylalanine);Com_358_pos(L-Pyroglutamic acid);Com_829_pos(Guanine);Com_428_pos(Quercetin);Com_168_pos(L-Glutamic acid);Com_211_pos(Pantothenic acid);Com_365_pos(Indole);Com_708_pos(-);Com_768_neg(8Z,11Z,14Z-Eicosatrienoic acid);Com_358_neg(-);Com_141_neg(Succinic acid);Com_68_neg(…	C05903+C00408+C00535+C00153+C00079+C01879+C00242+C00389+C00025+C00864+C00463+C01879+C03242+C07130+C00042+C04717
Metabolism	Carbohydrate metabolism	Citrate cycle (TCA cycle)	1	6	0.480439	0.672614	ko00020	Com_141_neg(Succinic acid)	C00042
Metabolism	Nucleotide metabolism	Purine metabolism	1	6	0.480439	0.672614	ko00230	Com_829_pos(Guanine)	C00242
Metabolism	Amino acid metabolism	Lysine degradation	1	6	0.480439	0.672614	ko00310	Com_65_pos(Pipecolic acid)	C00408
Metabolism	Amino acid metabolism	Histidine metabolism	1	6	0.480439	0.672614	ko00340	Com_168_pos(L-Glutamic acid)	C00025
Metabolism	Carbohydrate metabolism	C5-Branched dibasic acid metabolism	1	6	0.480439	0.672614	ko00660	Com_168_pos(L-Glutamic acid)	C00025
Metabolism	Biosynthesis of other secondary metabolites	Flavonoid biosynthesis	2	16	0.504054	0.686074	ko00941	Com_321_pos(Kaempferol);Com_428_pos(Quercetin)	C05903+C00389
Metabolism	Metabolism of other amino acids	beta-Alanine metabolism	1	7	0.534909	0.689751	ko00410	Com_211_pos(Pantothenic acid)	C00864
Metabolism	Biosynthesis of other secondary metabolites	Isoquinoline alkaloid biosynthesis	1	7	0.534909	0.689751	ko00950	Com_524_pos(Allocryptopine)	C02134
Metabolism	Global and overview maps	Biosynthesis of secondary metabolites	12	116	0.559719	0.703237	ko01110	Com_321_pos(Kaempferol);Com_65_pos(Pipecolic acid);Com_44_pos(L-Phenylalanine);Com_428_pos(Quercetin);Com_168_pos(L-Glutamic acid);Com_211_pos(Pantothenic acid);Com_365_pos(Indole);Com_230_pos(Vindoline);Com_524_pos(Allocryptopine);Com_39_pos(-);Com_358_neg(-);Com_141_neg(Succinic acid)	C05903+C00408+C00079+C00389+C00025+C00864+C00463+C01626+C02134+C18021+C07130+C00042
Metabolism	Amino acid metabolism	Arginine and proline metabolism	1	8	0.583866	0.715236	ko00330	Com_168_pos(L-Glutamic acid)	C00025
Metabolism	Amino acid metabolism	Arginine biosynthesis	1	9	0.627848	0.732489	ko00220	Com_168_pos(L-Glutamic acid)	C00025
Metabolism	Lipid metabolism	Biosynthesis of unsaturated fatty acids	1	9	0.627848	0.732489	ko01040	Com_768_neg(8Z,11Z,14Z-Eicosatrienoic acid)	C03242
Metabolism	Global and overview maps	Degradation of aromatic compounds	1	10	0.667341	0.760459	ko01220	Com_141_neg(Succinic acid)	C00042
Environmental Information Processing	Membrane transport	ABC transporters	2	22	0.686765	0.764806	ko02010	Com_44_pos(L-Phenylalanine);Com_168_pos(L-Glutamic acid)	C00079+C00025
Metabolism	Global and overview maps	Biosynthesis of antibiotics	3	34	0.709649	0.772729	ko01130	Com_44_pos(L-Phenylalanine);Com_168_pos(L-Glutamic acid);Com_141_neg(Succinic acid)	C00079+C00025+C00042
Metabolism	Global and overview maps	Biosynthesis of amino acids	2	24	0.734768	0.782688	ko01230	Com_44_pos(L-Phenylalanine);Com_168_pos(L-Glutamic acid)	C00079+C00025
Metabolism	Amino acid metabolism	Tyrosine metabolism	1	13	0.763104	0.795577	ko00350	Com_141_neg(Succinic acid)	C00042
Metabolism	Global and overview maps	Microbial metabolism in diverse environments	4	49	0.781539	0.797821	ko01120	Com_548_pos(Testosterone);Com_168_pos(L-Glutamic acid);Com_358_neg(-);Com_141_neg(Succinic acid)	C00535+C00025+C07130+C00042
Metabolism	Biosynthesis of other secondary metabolites	Phenylpropanoid biosynthesis	1	18	0.866815	0.866815	ko00940	Com_44_pos(L-Phenylalanine)	C00079

## Sheet: CK-T1
KEGG_A_class	KEGG_B_class	Pathway	CK-vs-T1 (24)	All (254)	Pvalue	Qvalue	Pathway ID	Metabolites	C_IDs
Metabolism	Carbohydrate metabolism	Pyruvate metabolism	2	3	0.0242697	0.385913	ko00620	Com_208_neg(Fumaric acid);Com_141_neg(Succinic acid)	C00122+C00042
Metabolism	Energy metabolism	Oxidative phosphorylation	2	4	0.045728	0.385913	ko00190	Com_208_neg(Fumaric acid);Com_141_neg(Succinic acid)	C00122+C00042
Metabolism	Global and overview maps	Degradation of aromatic compounds	3	10	0.057295	0.385913	ko01220	Com_375_pos(Acetophenone);Com_208_neg(Fumaric acid);Com_141_neg(Succinic acid)	C07113+C00122+C00042
Metabolism	Lipid metabolism	Fatty acid elongation	1	1	0.0944882	0.385913	ko00062	Com_429_pos(Palmitic Acid)	C00249
Metabolism	Carbohydrate metabolism	Propanoate metabolism	1	1	0.0944882	0.385913	ko00640	Com_141_neg(Succinic acid)	C00042
Metabolism	Metabolism of terpenoids and polyketides	Terpenoid backbone biosynthesis	1	1	0.0944882	0.385913	ko00900	Com_659_neg(Mevalonic acid)	C00418
Metabolism	Global and overview maps	Fatty acid metabolism	1	1	0.0944882	0.385913	ko01212	Com_429_pos(Palmitic Acid)	C00249
Metabolism	Carbohydrate metabolism	Citrate cycle (TCA cycle)	2	6	0.101556	0.385913	ko00020	Com_208_neg(Fumaric acid);Com_141_neg(Succinic acid)	C00122+C00042
Metabolism	Carbohydrate metabolism	Butanoate metabolism	2	6	0.101556	0.385913	ko00650	Com_208_neg(Fumaric acid);Com_141_neg(Succinic acid)	C00122+C00042
Metabolism	Metabolism of cofactors and vitamins	Porphyrin and chlorophyll metabolism	2	6	0.101556	0.385913	ko00860	Com_1073_pos(Stercobilin);Com_39_pos(-)	C05793+C18021
Metabolism	Metabolism of cofactors and vitamins	Nicotinate and nicotinamide metabolism	2	7	0.134073	0.408046	ko00760	Com_208_neg(Fumaric acid);Com_141_neg(Succinic acid)	C00122+C00042
Metabolism	Metabolism of other amino acids	Glutathione metabolism	2	8	0.168629	0.408046	ko00480	Com_358_pos(L-Pyroglutamic acid);Com_708_pos(-)	C01879+C01879
Metabolism	Lipid metabolism	Fatty acid biosynthesis	1	2	0.180387	0.408046	ko00061	Com_429_pos(Palmitic Acid)	C00249
Metabolism	Lipid metabolism	Fatty acid degradation	1	2	0.180387	0.408046	ko00071	Com_429_pos(Palmitic Acid)	C00249
Metabolism	Lipid metabolism	Sphingolipid metabolism	1	2	0.180387	0.408046	ko00600	Com_597_pos(Psychosine)	C01747
Metabolism	Energy metabolism	Sulfur metabolism	1	2	0.180387	0.408046	ko00920	Com_141_neg(Succinic acid)	C00042
Metabolism	Amino acid metabolism	Phenylalanine metabolism	3	16	0.182547	0.408046	ko00360	Com_45_neg(N-Acetyl-L-phenylalanine);Com_208_neg(Fumaric acid);Com_141_neg(Succinic acid)	C03519+C00122+C00042
Metabolism	Amino acid metabolism	Alanine, aspartate and glutamate metabolism	2	10	0.241415	0.491046	ko00250	Com_208_neg(Fumaric acid);Com_141_neg(Succinic acid)	C00122+C00042
Metabolism	Lipid metabolism	Cutin, suberine and wax biosynthesis	1	3	0.258445	0.491046	ko00073	Com_429_pos(Palmitic Acid)	C00249
Metabolism	Metabolism of cofactors and vitamins	Vitamin B6 metabolism	1	3	0.258445	0.491046	ko00750	Com_545_pos(Pyridoxine)	C00314
Metabolism	Global and overview maps	Microbial metabolism in diverse environments	6	49	0.305925	0.553579	ko01120	Com_375_pos(Acetophenone);Com_1131_pos(4-Hydroxybenzaldehyde);Com_545_pos(Pyridoxine);Com_1210_neg(4-Nitrophenol);Com_208_neg(Fumaric acid);Com_141_neg(Succinic acid)	C07113+C00633+C00314+C00870+C00122+C00042
Metabolism	Metabolism of terpenoids and polyketides	Diterpenoid biosynthesis	1	4	0.329351	0.568878	ko00904	Com_1085_pos(-)	C09092
Metabolism	Amino acid metabolism	Tyrosine metabolism	2	13	0.352818	0.582916	ko00350	Com_208_neg(Fumaric acid);Com_141_neg(Succinic acid)	C00122+C00042
Metabolism	Global and overview maps	Carbon metabolism	2	14	0.389177	0.598474	ko01200	Com_208_neg(Fumaric acid);Com_141_neg(Succinic acid)	C00122+C00042
Metabolism	Metabolism of cofactors and vitamins	Pantothenate and CoA biosynthesis	1	5	0.393733	0.598474	ko00770	Com_706_pos(Uracil)	C00106
Metabolism	Nucleotide metabolism	Pyrimidine metabolism	1	6	0.452168	0.636385	ko00240	Com_706_pos(Uracil)	C00106
Metabolism	Biosynthesis of other secondary metabolites	Flavone and flavonol biosynthesis	1	6	0.452168	0.636385	ko00944	Com_421_neg(Rutin)	C05625
Metabolism	Metabolism of other amino acids	beta-Alanine metabolism	1	7	0.505184	0.6399	ko00410	Com_706_pos(Uracil)	C00106
Metabolism	Carbohydrate metabolism	Glyoxylate and dicarboxylate metabolism	1	7	0.505184	0.6399	ko00630	Com_141_neg(Succinic acid)	C00042
Metabolism	Biosynthesis of other secondary metabolites	Isoquinoline alkaloid biosynthesis	1	7	0.505184	0.6399	ko00950	Com_524_pos(Allocryptopine)	C02134
Metabolism	Amino acid metabolism	Arginine and proline metabolism	1	8	0.553264	0.648006	ko00330	Com_1157_neg(4-Oxoproline)	C01877
Metabolism	Biosynthesis of other secondary metabolites	Tropane, piperidine and pyridine alkaloid biosynthesis	1	8	0.553264	0.648006	ko00960	Com_702_pos(Ecgonine methyl ester)	C12448
Metabolism	Global and overview maps	Biosynthesis of secondary metabolites	11	116	0.576454	0.648006	ko01110	Com_586_pos(Coumarin);Com_702_pos(Ecgonine methyl ester);Com_1085_pos(-);Com_524_pos(Allocryptopine);Com_39_pos(-);Com_421_neg(Rutin);Com_208_neg(Fumaric acid);Com_325_neg(Gentiopicrin);Com_679_neg(5-Methoxypsoralen);Com_141_neg(Succinic acid);Com_659_neg(Mevalonic acid)	C05851+C12448+C09092+C02134+C18021+C05625+C00122+C09782+C01557+C00042+C00418
Metabolism	Amino acid metabolism	Arginine biosynthesis	1	9	0.596848	0.648006	ko00220	Com_208_neg(Fumaric acid)	C00122
Metabolism	Lipid metabolism	Biosynthesis of unsaturated fatty acids	1	9	0.596848	0.648006	ko01040	Com_429_pos(Palmitic Acid)	C00249
Metabolism	Global and overview maps	Biosynthesis of antibiotics	3	34	0.652775	0.68904	ko01130	Com_208_neg(Fumaric acid);Com_141_neg(Succinic acid);Com_659_neg(Mevalonic acid)	C00122+C00042+C00418
Metabolism	Biosynthesis of other secondary metabolites	Phenylpropanoid biosynthesis	1	18	0.84318	0.859846	ko00940	Com_586_pos(Coumarin)	C05851
Metabolism	Global and overview maps	Metabolic pathways	12	148	0.859846	0.859846	ko01100	Com_706_pos(Uracil);Com_702_pos(Ecgonine methyl ester);Com_358_pos(L-Pyroglutamic acid);Com_1131_pos(4-Hydroxybenzaldehyde);Com_545_pos(Pyridoxine);Com_1340_pos(Cortisone);Com_708_pos(-);Com_429_pos(Palmitic Acid);Com_421_neg(Rutin);Com_208_neg(Fumaric acid);Com_141_neg(Succinic acid);Com_659_neg(Mevalonic acid)	C00106+C12448+C01879+C00633+C00314+C00762+C01879+C00249+C05625+C00122+C00042+C00418
